# Supplementary material for: Efficient access to amides of the carborane carboxylic acid [1-(COOH)–CB11H11]−
Source: PubMed Central journal article supplement — RSC Adv. 2018 Jun 19;8(40):22447–51. doi: 10.1039/c8ra03067g (PMC9081092; doi:10.1039/c8ra03067g), 2018-06-19
Supplement: RA-008-C8RA03067G-s001.pdf [file RA-008-C8RA03067G-s001.pdf]

**Supplementary Information for**

**Efficient access to amides of the carborane  
carboxylic acid [1-(COOH)-CB<sub>11</sub>H<sub>11</sub>]<sup>-</sup>**

Yunjun Shen,<sup>‡a</sup> Kai Zheng,<sup>‡a</sup> Rakesh Dontha,<sup>a</sup> Yani Pan,<sup>a</sup> Jiyong Liu,<sup>a</sup> and Simon  
Duttwyler<sup>\*a</sup>

<sup>a</sup>Department of Chemistry, Zhejiang University,  
38 Zheda Road, 310027 Hangzhou, PR China

\*Email address: [duttwyler@zju.edu.cn](mailto:duttwyler@zju.edu.cn)

<sup>‡</sup>These authors contributed equally

**Table of Contents**

|            |                              |                      |
|------------|------------------------------|----------------------|
| <b>I</b>   | <b>General Information</b>   | <b>p. S2–S3</b>      |
| <b>II</b>  | <b>Experimental Section</b>  | <b>p. S4–S19</b>     |
| <b>III</b> | <b>X-ray Crystallography</b> | <b>p. S20–S23</b>    |
| <b>IV</b>  | <b>References</b>            | <b>p. S24</b>        |
| <b>V</b>   | <b>NMR spectra</b>           | <b>p. NMR1–NMR80</b> |
| <b>VI</b>  | <b>Mass spectra</b>          | <b>p. MS1–MS20</b>   |

## I General Information

### Chemicals

If not otherwise specified, reagents and organic solvents were commercially available and used without further purification. acetone- $d_6$  and  $CD_3CN$  were purchased from Cambridge Isotope Laboratories and filtered through  $Al_2O_3$  prior to use. All carborane starting materials were prepared according to the literature.[1] Anhydrous solvents were prepared by passage through activated  $Al_2O_3$  and stored over 3 Å molecular sieves.

### Reaction Conditions

Glassware for air-sensitive reactions was dried at 150 °C for at least 12 h and allowed to cool in a vacuum.

### Characterization

Thin-layer chromatography (TLC) was carried out using silica gel 60, F254 with a thickness of 0.25 mm. Column chromatography was performed on silica gel 60 (200-30 mesh).

NMR spectra were recorded on a Bruker AVANCE III 500 spectrometer ( $^1H$  NMR 500.13 MHz,  $^{13}C$  NMR 125.77 MHz,  $^{11}B$  NMR 160.46 MHz) or a Bruker AVANCE III 400 spectrometer ( $^1H$  NMR 400.13 MHz,  $^{13}C$  NMR 100.62 MHz,  $^{11}B$  NMR 128.38 MHz) at the temperature indicated. Data are reported as follows: Chemical shift in ppm, multiplicity (s = singlet, d = doublet, t = triplet, q = quartet, m = multiplet, dd = doublet of doublets, etc.), coupling constant  $J$  in Hz, integration, and (where applicable) interpretation. Signals were referenced against solvent peaks ( $^1H$ : residual  $CHD_2C(O)CD_3$  = 2.05 ppm, residual  $CHD_2CN$  = 1.94 ppm, residual  $^{13}C\{^1H\}$ :  $CD_3C(O)CD_3$  = 29.84 ppm,  $CD_3CN$  = 1.32 ppm).  $^{11}B$  and  $^{11}B\{^1H\}$  NMR spectra were calibrated against external  $BF_3 \cdot Et_2O$  = 0 ppm ( $BF_3 \cdot Et_2O$  capillary in  $C_6D_6$ ).

In certain  $^1H$  and  $^1H\{^{11}B\}$  NMR spectra measured in acetone- $d_6$ , double water peaks were observed. This is a result of different resonances from  $H_2O$  and  $HOD$  and has been described in the literature.[2]

Low-resolution ESI-MS data were recorded on Advion Expression CMS instrument.

High-resolution MS data were recorded using IT-TOF detection (Shimadzu, Japan) equipped with an electrospray ionization source (ESI). Calibration to achieve accurate mass determination was carried out with sodium trifluoroacetate clusters as a reference.

Single-crystal X-ray diffraction studies were performed on an Oxford Diffraction Gemini A Ultra diffractometer equipped with an 135mm Atlas CCD detector and using Mo K- $\alpha$  radiation.

Elemental analysis of boron-containing compounds performed by our department has resulted in inconsistent C/H/N values for identical crystalline batches. The reason seems to be irreproducible formation of boron carbide and boron nitride species as a result of incomplete combustion, at least on our instrument. Other groups have observed discrepancies between calculated and found values for certain boron cage compounds as well, see references [3,4].

We therefore refrained from "submitting until the numbers are right" and focused on collecting spectroscopic data that give evidence of the purity of the isolated products. Especially the full-range mass spectra demonstrate the absence of undesired carborane by-products.

## II Experimental Section

### II. a) Synthesis of acid chloride **1**

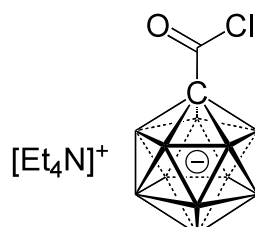

To a stirred suspension of carboxylic acid  $[\text{Et}_4\text{N}][1-(\text{COOH})\text{-CB}_{11}\text{H}_{11}]$  (800 mg, 2.52 mmol) in dry  $\text{CH}_2\text{Cl}_2$  (15 mL) were added dimethylformamide (*ca.* 10 drops) and oxalyl chloride (0.234 mL, 2.77 mmol). The reaction mixture was allowed to stir for 30 min at room temperature. Isolation of the acid chloride **1** could be accomplished using the following methods:

- (i) The volatiles were removed carefully under vacuum with nitrogen-cooled solvent traps. A white solid was obtained that was dried under high vacuum at 25 °C for 12 h. It was identified as acid chloride **1** in >95% purity as evidenced by NMR spectroscopy and mass spectrometry (735 mg, 87% yield).
- (ii): Direct precipitation by hexane addition (10 mL), stirring at 25 °C for 1 h and collection in a glass frit. After washing with hexane (2 x 10 mL) and drying in a vacuum, **1** was obtained in identical yield.

$^1\text{H}\{^{11}\text{B}\}$  NMR (400 MHz,  $\text{CD}_3\text{CN}$ , 22 °C):  $\delta$  3.16 (q,  $J = 7.3$  Hz, 8H,  $\text{CH}_2$  of cation), 1.97 (broad signal, 5H, BH), 1.78 (broad signal, 1H, BH), 1.59 (broad signal, 5H, BH), 1.21 (tt,  $J = 7.3$  Hz, 1.9 Hz, 12H,  $\text{CH}_3$  of cation).

$^{13}\text{C}\{^1\text{H}\}$  NMR (100 MHz,  $\text{CD}_3\text{CN}$ , 22 °C):  $\delta$  169.72 (CO), 75.55 (cage C), 53.02 ( $\text{CH}_2$  of cation), 7.65 ( $\text{CH}_3$  of cation).

$^{11}\text{B}\{^1\text{H}\}$  NMR (128 MHz,  $\text{CD}_3\text{CN}$ , 22 °C):  $\delta$  -4.87 (1B), -12.64 (5B), -13.39 (5B).

HRMS (ESI):  $m/z$  Calcd. for  $[\text{C}_2\text{H}_{11}\text{B}_{11}\text{ClO}]^-$ , 205.1595; found, 205.1609.

## Monitoring of the hydrolysis of 1

The hydrolysis of acid chloride **1** was followed by NMR spectroscopy in CD<sub>3</sub>CN/D<sub>2</sub>O (5:1 v/v) at 25 °C and 50 °C. The <sup>11</sup>B{<sup>1</sup>H} NMR spectra are shown in Figures S1 and S2. At 25 °C, hydrolysis was slow with a 52% conversion to the acid after 40 h. At 50 °C, the conversion to the acid was 83% after 20 h and >95% after 40 h.

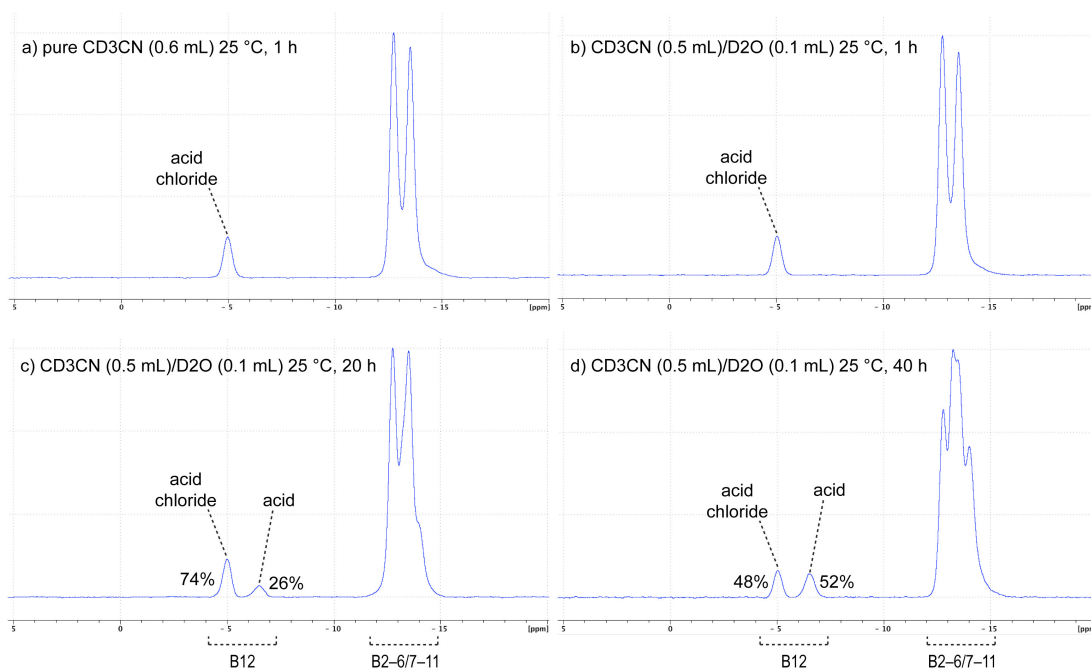

**Figure S1.** Monitoring of the hydrolysis of **1** at 25 °C by <sup>11</sup>B{<sup>1</sup>H} NMR spectroscopy by integration of the resonance of the B12 position.

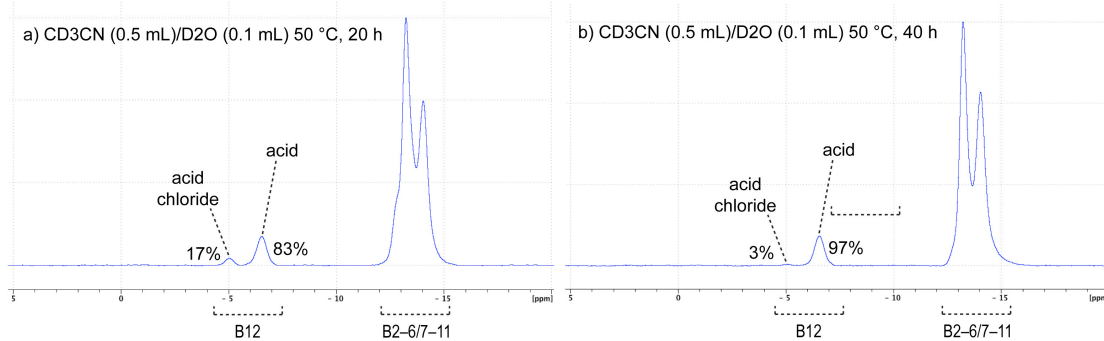

**Figure S2.** Monitoring of the hydrolysis of **1** at 50 °C by <sup>11</sup>B{<sup>1</sup>H} NMR spectroscopy by integration of the resonance of the B12 position.

## b) General procedure for the synthesis of carborane amides 2

Acid chloride **1** (250 mg, 0.75 mmol) was dissolved in dry  $\text{CH}_2\text{Cl}_2$  (20 mL), amine (1.5 mmol) and  $\text{Et}_3\text{N}$  (0.10 mL, 0.75 mmol) were added, and the resulting mixture was stirred at room temperature for 20 min. All volatile components were then removed completely in a vacuum.

(i) For the synthesis of **2b**, **2d**, and **2f-l**, the residue was taken up in 1 M HCl (pH = 2) and extracted with diethyl ether (3 x 40 mL). The combined organic extracts were evaporated under reduced pressure, and the crude product was dissolved in water (15 mL) and filtered.  $[\text{Et}_4\text{N}]^+\text{Br}^-$  (315 mg, 1.5 mmol) was added to the filtrate, and the resulting white precipitate was collected in a glass frit and dried in a vacuum to give the product.

(ii) For synthesis of **2a**, **2c**, **2e** and **2m**, the residue was purified by column chromatography on silica gel eluting with a mixture of  $\text{CH}_2\text{Cl}_2/\text{CH}_3\text{CN}$  to afford the desired product.

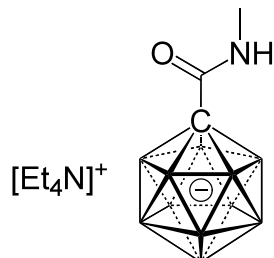

**2a**: Prepared following the general procedure, using methylamine as the substrate, **2a** (114 mg, 46 % yield) was obtained as a white solid. Methylamine was prepared as a 0.1 M solution in EtOAc by mixing  $[\text{MeNH}_3][\text{Cl}]$  with  $\text{Na}_2\text{CO}_3$  (1.5 equiv) in EtOAc/ $\text{H}_2\text{O}$  (2:1 v/v).

$^1\text{H}\{^{11}\text{B}\}$  NMR (400 MHz, acetone- $d_6$ , 22 °C):  $\delta$  6.49 (broad signal, 1H, NH), 3.47 (q,  $J = 7.3$  Hz, 8H,  $\text{CH}_2$  of cation), 2.60 (d,  $J = 6.2$  Hz 3H,  $\text{CH}_3\text{NH}$ ), 1.90 (broad signal, 5H, BH), 1.73 (broad signal, 1H, BH), 1.59 (broad signal, 5H, BH), 1.39 (tt,  $J = 7.3$  Hz, 1.9 Hz, 12H,  $\text{CH}_3$  of cation).

$^{13}\text{C}\{^1\text{H}\}$  NMR (100 MHz, acetone- $d_6$ , 22 °C):  $\delta$  166.20 (CO), 71.57 (cage C), 52.62

(CH<sub>2</sub> of cation), 26.80, 7.30 (CH<sub>3</sub> of cation).

<sup>11</sup>B{<sup>1</sup>H} NMR (160 MHz, acetone-*d*<sub>6</sub>, 22 °C): δ -6.13 (1B), -12.27 (5B), -13.41 (5B).

HRMS (ESI): *m/z* Calcd. for [C<sub>3</sub>H<sub>15</sub>B<sub>11</sub>NO]<sup>-</sup>, 200.2250; found, 200.2265.

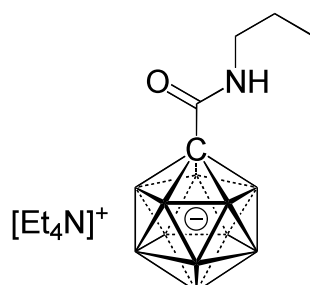

**2b**: Prepared following the general procedure, using propylamine as the substrate, **2b** (243 mg, 91% yield) was obtained as a white solid.

<sup>1</sup>H{<sup>11</sup>B} NMR (400 MHz, acetone-*d*<sub>6</sub>, 22 °C): δ 6.42 (1H, NH), 3.48 (q, *J* = 7.3 Hz, 8H, CH<sub>2</sub> of cation), 3.03 (q, *J* = 6.3 Hz, 2H, NHCH<sub>2</sub>), 1.92 (broad signal, 5H, BH), 1.74 (broad signal, 1H, BH), 1.60 (broad signal, 5H, BH), 1.42 (overlapping signals, 14H, CH<sub>3</sub> of cation and CH<sub>2</sub>), 0.82 (t, *J* = 7.3 Hz, 3H, CH<sub>3</sub>).

<sup>13</sup>C{<sup>1</sup>H} NMR (100 MHz, acetone-*d*<sub>6</sub>, 22 °C): δ 165.93 (CO), 72.18 (cage C), 53.00 (CH<sub>2</sub> of cation), 42.19, 23.31, 11.46, 7.68 (CH<sub>3</sub> of cation).

<sup>11</sup>B{<sup>1</sup>H} NMR (128 MHz, acetone-*d*<sub>6</sub>, 22 °C): δ -7.09 (1B), -13.14 (5B), -14.27 (5B).

HRMS (ESI): *m/z* Calcd. for [C<sub>5</sub>H<sub>19</sub>B<sub>11</sub>NO]<sup>-</sup>, 228.2563; found, 228.2576.

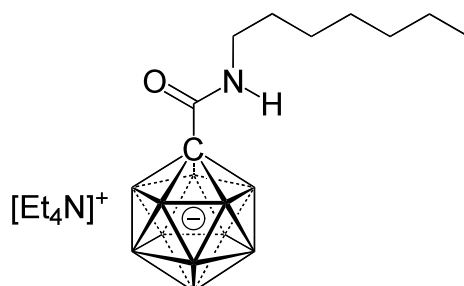

**2c**: Prepared following the general procedure, using *n*-heptylamine as the substrate, **2c** (280 mg, 90% yield) was obtained as a white solid.

$^1\text{H}\{^{11}\text{B}\}$  NMR (400 MHz, acetone- $d_6$ , 22 °C):  $\delta$  6.51 (broad signal, 1H, NH), 3.46 (q,  $J = 7.3$  Hz, 8H,  $\text{CH}_2$  of cation), 3.08 (q,  $J = 6.7$  Hz, 2H,  $\text{NHCH}_2$ ), 1.90 (broad signal, 5H, BH), 1.73 (broad signal, 1H, BH), 1.59 (broad signal, 5H, BH), 1.38 (tt,  $J = 7.3$  Hz, 1.9 Hz, 12H,  $\text{CH}_3$  of cation), 1.26 (overlapping m, 10H,  $\text{CH}_2$ ), 0.86 (t,  $J = 6.5$  Hz, 3H,  $\text{CH}_3$ ).

$^{13}\text{C}\{^1\text{H}\}$  NMR (100 MHz, acetone- $d_6$ , 22 °C):  $\delta$  166.22 (CO), 71.90 (cage C), 52.94 ( $\text{CH}_2$  of cation), 40.55, 32.42, 29.99, 29.60, 27.28, 23.14, 14.28, 7.63 ( $\text{CH}_3$  of cation).

$^{11}\text{B}\{^1\text{H}\}$  NMR (128 MHz, acetone- $d_6$ , 22 °C):  $\delta$  -7.01 (1B), -13.11 (5B), -14.29 (5B).

HRMS (ESI):  $m/z$  Calcd. for  $[\text{C}_9\text{H}_{27}\text{B}_{11}\text{NO}]^-$ , 284.3189; found, 284.3224.

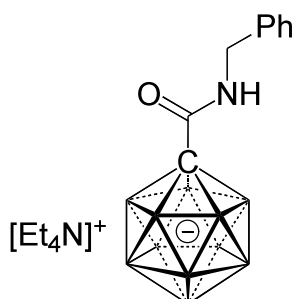

**2d**: Prepared following the general procedure, using benzylamine as the substrate, **2d** (265 mg, 87% yield) was obtained as a white solid.

$^1\text{H}\{^{11}\text{B}\}$  NMR (400 MHz, acetone- $d_6$ , 22 °C):  $\delta$  7.30 (m, 2H, ArH), 7.21 (m, 3H, ArH), 7.00 (broad signal, 1H, NH), 4.31 (d,  $J = 6.2$  Hz, 2H,  $\text{NHCH}_2$ ), 3.44 (q,  $J = 7.3$  Hz, 8H,  $\text{CH}_2$  of cation), 1.98 (broad signal, 5H, BH), 1.77 (broad signal, 1H, BH), 1.63 (broad signal, 5H, BH), 1.36 (tt,  $J = 7.3$  Hz, 1.9 Hz, 12H,  $\text{CH}_3$  of cation).

$^{13}\text{C}\{^1\text{H}\}$  NMR (100 MHz, acetone- $d_6$ , 22 °C):  $\delta$  166.25 (CO), 140.72, 129.03, 127.58, 127.41 (aryl C), 71.88 (cage C), 52.95 ( $\text{CH}_2$  of cation), 43.9, 7.64 ( $\text{CH}_3$  of cation).

$^{11}\text{B}\{^1\text{H}\}$  NMR (128 MHz, acetone- $d_6$ , 22 °C):  $\delta$  -6.85 (1B), -13.05 (5B), -14.21 (5B).

HRMS (ESI):  $m/z$  Calcd. for  $[\text{C}_9\text{H}_{25}\text{B}_{11}\text{NO}]^-$ , 276.2563; found, 276.2576.



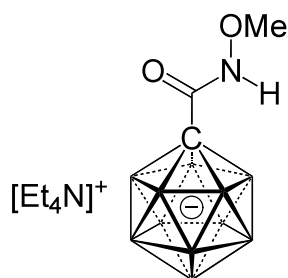

**2e**: Prepared following the general procedure b, using methoxyamine as the substrate, **2e** (130 mg, 50% yield) was obtained as a white solid. Methoxyamine was prepared as a 0.1 M solution in EtOAc by mixing [MeONH<sub>3</sub>][Cl] with Na<sub>2</sub>CO<sub>3</sub> (1.5 equiv) in EtOAc/H<sub>2</sub>O (2:1 v/v).

<sup>1</sup>H{<sup>11</sup>B} NMR (500 MHz, CD<sub>3</sub>CN, 22 °C): δ 9.03 (broad signal, 1 H, NH), 3.55 (s, 3H, CH<sub>3</sub>O), 3.16 (q, *J* = 7.3 Hz, 8H, CH<sub>2</sub> of cation), 1.81 (broad overlapping signals, 6H, BH), 1.52 (broad signal, 5H, BH), 1.21 (tt, *J* = 7.3Hz, 1.9 Hz, 12H, CH<sub>3</sub> of cation).  
<sup>13</sup>C{<sup>1</sup>H} NMR (100 MHz, CD<sub>3</sub>CN, 22 °C): δ 163.80 (CO), 68.91 (cage C), 63.93 (CH<sub>3</sub>O), 53.03 (CH<sub>2</sub> of cation), 7.66 (CH<sub>3</sub> of cation).

<sup>11</sup>B{<sup>1</sup>H} NMR (160 MHz, CD<sub>3</sub>CN, 22 °C): δ -6.70 (1B), -13.25 (5B), -14.55 (5B).

HRMS (ESI): *m/z* Calcd. for [C<sub>3</sub>H<sub>15</sub>B<sub>11</sub>NO<sub>2</sub>]<sup>-</sup>, 216.2199; found, 216.2248.

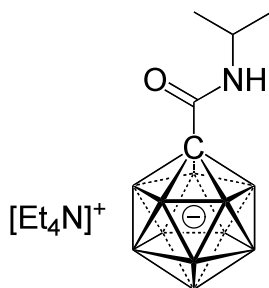

**2f**: Prepared following the general procedure, using isopropylamine as the substrate, **2f** (239 mg, 89% yield) was obtained as a white solid.

<sup>1</sup>H{<sup>11</sup>B} NMR (400 MHz, acetone-*d*<sub>6</sub>, 22 °C): δ 3.78 (septet, *J* = 6.5 Hz, 1H, CH), 3.48 (q, *J* = 7.3 Hz, 8H, CH<sub>2</sub> of cation), 1.89 (broad signal, 5H, BH), 1.74 (broad signal, 1H, BH), 1.60 (broad signal, 5H, BH), 1.39 (tt, *J* = 7.3Hz, 1.9 Hz, 12H, CH<sub>3</sub> of cation), 1.05 (d, *J* = 6.5 Hz, 6H, CH<sub>3</sub>). The N-H signal could not be detected unambiguously.

<sup>13</sup>C{<sup>1</sup>H} NMR (100 MHz, acetone-*d*<sub>6</sub>, 22 °C): δ 165.05 (CO), 72.09 (cage C), 52.98

(CH<sub>2</sub> of cation), 42.28, 22.36, 7.66 (CH<sub>3</sub> of cation).

<sup>11</sup>B{<sup>1</sup>H} NMR (128 MHz, acetone-*d*<sub>6</sub>, 22 °C): δ -7.06 (1B), -13.14 (5B), -14.30 (5B).

HRMS (ESI): *m/z* Calcd. for [C<sub>5</sub>H<sub>19</sub>B<sub>11</sub>NO]<sup>-</sup>, 228.2563; found, 228.2575.

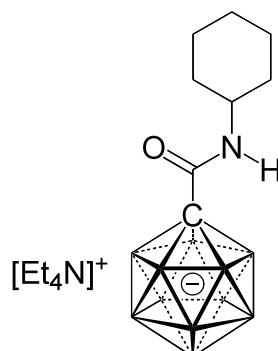

**2g**: Prepared following the general procedure, using cyclohexylamine as the substrate, **2g** (257 mg, 86% yield) was obtained as a white solid.

<sup>1</sup>H{<sup>11</sup>B} NMR (400 MHz, acetone-*d*<sub>6</sub>, 22 °C): δ 3.35-3.60 (overlapping signals, 9H, CH<sub>2</sub> of cation and N-CH), 1.90 (broad signal, 5H, BH), 1.80-1.47 (overlapping signals, 11H, BH, cyclohexyl CH), 1.39 (tt, *J* = 7.3Hz, 1.9 Hz, 12H, CH<sub>3</sub> of cation), 1.10-1.30 (overlapping signals, 5H, cyclohexyl CH). The N-H signal appeared as a weak signal at 6.07 ppm.

<sup>13</sup>C{<sup>1</sup>H} NMR (100 MHz, acetone-*d*<sub>6</sub>, 22 °C): δ 164.97 (CO), 72.11 (cage C), 52.97 (CH<sub>2</sub> of cation), 49.13, 32.92, 26.19, 25.36, 7.66 (CH<sub>3</sub> of cation).

<sup>11</sup>B{<sup>1</sup>H} NMR (128 MHz, acetone-*d*<sub>6</sub>, 22 °C): δ -7.06 (1B), -13.12 (5B), -14.29 (5B).

HRMS (ESI): *m/z* Calcd. for [C<sub>8</sub>H<sub>23</sub>B<sub>11</sub>NO]<sup>-</sup>, 268.2876; found, 268.2890.

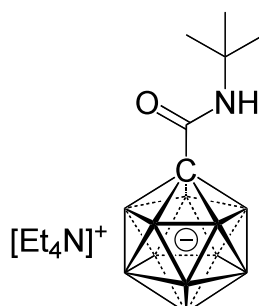

**2h**: Prepared following the general procedure, using *tert*-butylamine as the substrate, **2h** (251 mg, 90% yield) was obtained as a white solid.

$^1\text{H}\{^{11}\text{B}\}$  NMR (400 MHz, acetone- $d_6$ , 22 °C):  $\delta$  5.91 (broad signal, 1 H, NH), 3.48 (q,  $J = 7.3$  Hz, 8H,  $\text{CH}_2$  of cation), 1.89 (broad signal, 5H, BH), 1.73 (broad signal, 1H, BH), 1.60 (broad signal, 5H, BH), 1.40 (tt,  $J = 7.3$  Hz, 1.9 Hz, 12H,  $\text{CH}_3$  of cation), 1.22 (s, 9H,  $\text{CH}_3$ ). The N-H signal appeared as a weak signal at 5.91 ppm.

$^{13}\text{C}\{^1\text{H}\}$  NMR (100 MHz, acetone- $d_6$ , 22 °C):  $\delta$  165.12 (CO), 72.95 (cage C), 52.99 ( $\text{CH}_2$  of cation), 51.13, 29.64, 7.66 ( $\text{CH}_3$  of cation).

$^{11}\text{B}\{^1\text{H}\}$  NMR (128 MHz, acetone- $d_6$ , 22 °C):  $\delta$  -7.23 (1B), -13.14 (5B), -14.26 (5B).

HRMS (ESI):  $m/z$  Calcd. for  $[\text{C}_6\text{H}_{21}\text{B}_{11}\text{NO}]^-$ , 242.2719; found, 242.2727.

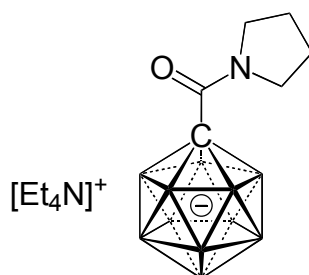

**2i**: Prepared following the general procedure, using pyrrolidine as the substrate, **2i** (251 mg, 90% yield) was obtained as a white solid.

The spectroscopic data matched with those reported.[1]

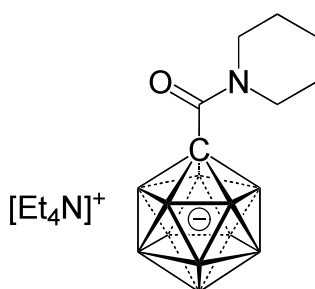

**2j**: Prepared following the general procedure, using piperidine as the substrate, **2j** (242 mg, 84% yield) was obtained as a white solid.

$^1\text{H}\{^{11}\text{B}\}$  NMR (400 MHz, acetone- $d_6$ , 22 °C):  $\delta$  3.63 (m, 4H,  $\text{CH}_2\text{NCH}_2$ ), 3.48 (q,  $J = 7.3$  Hz, 8H,  $\text{CH}_2$  of cation), 2.05 (broad signal, overlapping with solvent residual signal, 5 H, BH), 1.84 (broad signal, 1H, BH), 1.65-1.55 (overlapping signals, 7H,

BH and CH<sub>2</sub>), 1.45-1.30 (overlapping signals, 18H, CH<sub>3</sub> of cation and CH<sub>2</sub>).

<sup>13</sup>C{<sup>1</sup>H} NMR (100 MHz, acetone-*d*<sub>6</sub>, 22 °C): δ 164.27 (CO), 71.61 (cage C), 53.02 (CH<sub>2</sub> of cation), 48.15, 27.20, 25.33, 7.68 (CH<sub>3</sub> of cation).

<sup>11</sup>B{<sup>1</sup>H} NMR (128 MHz, acetone-*d*<sub>6</sub>, 22 °C): δ -5.26 (1B), -13.23 (10B).

HRMS (ESI): *m/z* Calcd. for [C<sub>7</sub>H<sub>21</sub>B<sub>11</sub>NO]<sup>-</sup>, 254.2719; found, 254.2730.

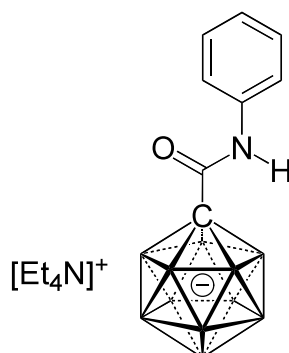

**2k**: Prepared following the general procedure, using aniline as the substrate, **2k** (256 mg, 87% yield) was obtained as a white solid.

<sup>1</sup>H{<sup>11</sup>B} NMR (400 MHz, acetone-*d*<sub>6</sub>, 22°C): δ 8.13 (broad signal, 1H, NH), 7.61 (d, *J* = 8.0 Hz, 2H, ArH), 7.29 (t, *J* = 8.0 Hz, 2H, ArH), 7.06 (t, *J* = 8.0 Hz, 1H, ArH), 3.45 (q, *J* = 7.3 Hz, 8H, CH<sub>2</sub> of cation), 2.05 (broad signal, overlapping with solvent residual signal, 5H, BH), 1.83 (broad signal, 1H, BH), 1.69 (broad signal, 5H, BH), 1.38 (tt, *J* = 7.3 Hz, 1.9 Hz, 12H, CH<sub>3</sub> of cation).

<sup>13</sup>C{<sup>1</sup>H} NMR (100 MHz, acetone-*d*<sub>6</sub>, 22°C): δ 164.31 (CO), 139.73, 129.42, 124.38, 120.32, 72.23 (cage C), 52.96 (CH<sub>2</sub> of cation), 7.63 (CH<sub>3</sub> of cation)

<sup>11</sup>B{<sup>1</sup>H} NMR (128 MHz, acetone-*d*<sub>6</sub>, 22°C): δ -6.62 (1B), -12.87 (5B), -14.18 (5B).

HRMS (ESI): *m/z* Calcd. for [C<sub>8</sub>H<sub>17</sub>B<sub>11</sub>NO]<sup>-</sup>, 262.2406 ; found, 262.2412.

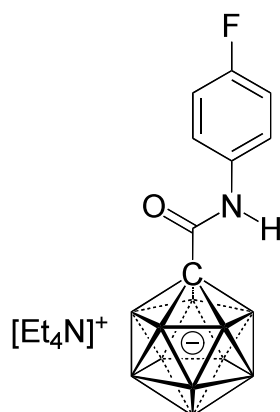

**2l**: Prepared following the general procedure, using 4-fluoroaniline as the substrate, **2l** (265 mg, 86% yield) was obtained as a white solid.

$^1\text{H}\{^{11}\text{B}\}$  NMR (400 MHz, acetone- $d_6$ , 22°C):  $\delta$  8.18 (broad signal, 1H, NH), 7.45-7.78 (m, 2H, ArH), 6.89-7.27 (m, 2H, ArH), 3.47 (q,  $J = 7.3$  Hz, 8H,  $\text{CH}_2$  of cation), 2.02 (broad signal, 5H, BH), 1.81 (broad signal, 1H, BH), 1.67 (broad signal, 5H, BH), 1.38 (tt,  $J = 7.3$  Hz, 1.9 Hz, 12H,  $\text{CH}_3$  of cation).

$^{13}\text{C}\{^1\text{H}\}$  NMR (125 MHz, acetone- $d_6$ , 22°C):  $\delta$  164.55 (CO), 159.75 (d,  $J = 240$  Hz, C-F), 136.24 (d,  $J = 2.4$  Hz), 122.47 (d,  $J = 8.0$  Hz), 115.87 (d,  $J = 22.4$  Hz), 72.06 (cage C), 53.00 ( $\text{CH}_2$  of cation), 7.65 ( $\text{CH}_3$  of cation).

$^{11}\text{B}\{^1\text{H}\}$  NMR (160 MHz, acetone- $d_6$ , 22°C):  $\delta$  -6.54 (1B), -12.87 (5B), -14.20 (5B).

HRMS (ESI):  $m/z$  Calcd. for  $[\text{C}_8\text{H}_{16}\text{B}_{11}\text{FNO}]^-$ , 280.2312; found, 280.2325.

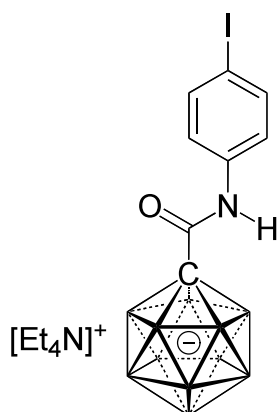

**2m**: Prepared following the general procedure, using 4-iodoaniline as the substrate, **2m** (357 mg, 92% yield) was obtained as a white solid.

$^1\text{H}\{^{11}\text{B}\}$  NMR (400 MHz,  $\text{CD}_3\text{CN}$ , 22 °C):  $\delta$  7.97 (broad signal, 1H, NH), 7.58 (d,  $J = 7.3$  Hz, 2H, ArH), 7.29 (d,  $J = 7.3$ , 2H, ArH), 3.12 (q,  $J = 7.3$  Hz, 8H,  $\text{CH}_2$  of cation), 2.20 (broad signal, 5H, BH), 1.68 (broad signal, 1 H, BH), 1.55 (broad signal, 5H, BH), 1.19 (tt,  $J = 7.3\text{Hz}$ , 1.9 Hz, 12H,  $\text{CH}_3$  of cation).

$^{13}\text{C}\{^1\text{H}\}$  NMR (100 MHz,  $\text{CD}_3\text{CN}$ , 22 °C):  $\delta$  164.66 (CO), 139.09, 138.49, 123.14, 87.64, 72.21 (cage C), 52.98 ( $\text{CH}_2$  of cation), 7.62 ( $\text{CH}_3$  of cation).

$^{11}\text{B}\{^1\text{H}\}$  NMR (128 MHz,  $\text{CD}_3\text{CN}$ , 22 °C):  $\delta$  -6.69 (1B), -12.97 (5B), -14.21 (5B).

HRMS (ESI):  $m/z$  Calcd. for  $[\text{C}_8\text{H}_{16}\text{B}_{11}\text{INO}]^-$ , 388.1373; found, 388.1392.

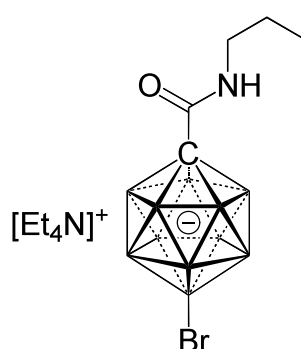

**4a:** The acid chloride [1-(C(O)Cl)-CB<sub>11</sub>H<sub>10</sub>-12-Br][Et<sub>4</sub>N] was prepared in a similar manner to **1** and collected as a precipitate in a glass frit. Prepared following the general procedure for products **2**, using propylamine as the substrate, **4a** (265 mg, 81% yield with respect to the carboxylic acid) was obtained as a white solid.

$^1\text{H}\{^{11}\text{B}\}$  NMR (400 MHz, acetone- $d_6$ , 22 °C):  $\delta$  6.48 (broad signal, 1H, NH), 3.49 (q,  $J = 7.3$  Hz, 8H,  $\text{CH}_2$  of cation), 3.04 (m, 2H,  $\text{NHCH}_2$ ), 2.00-1.80 (broad overlapping signals, 10H, BH), 1.45-1.31 (overlapping signals, 14H,  $\text{CH}_3$  of cation,  $\text{CH}_3\text{CH}_2$ ), 0.81 (t,  $J = 7.4$  Hz, 3H,  $\text{CH}_3\text{CH}_2$ ).

$^{13}\text{C}\{^1\text{H}\}$  NMR (100 MHz, acetone- $d_6$ , 22°C):  $\delta$  165.82 (CO), 66.08 (cage C), 52.99 ( $\text{CH}_2$  of cation), 42.27 ( $\text{NHCH}_2$ ), 23.24 ( $\text{CH}_3\text{CH}_2$ ), 11.41 ( $\text{CH}_3\text{CH}_2$ ), 7.67 ( $\text{CH}_3$  of cation).

$^{11}\text{B}\{^1\text{H}\}$  NMR (160 MHz, acetone- $d_6$ , 22 °C):  $\delta$  -1.94 (1B), -12.37 (5B), -14.90 (5B).

HRMS (ESI):  $m/z$  Calcd. for  $[\text{C}_5\text{H}_{18}\text{B}_{11}\text{BrNO}]^-$ , 306.1668; found, 306.1707.

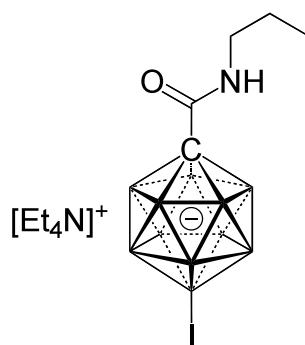

**4b:** The acid chloride [1-(C(O)Cl)-CB<sub>11</sub>H<sub>10</sub>-12-I][Et<sub>4</sub>N] was prepared in a similar manner to **1** and collected as a precipitate in a glass frit. Prepared following the general procedure for products **2**, using propylamine as the substrate, **4b** (320 mg, 88% yield with respect to the carboxylic acid) was obtained as a white solid.

<sup>1</sup>H{<sup>11</sup>B} NMR (400 MHz, acetone-*d*<sub>6</sub>, 22°C): δ 6.45 (broad signal, 1H, NH), 3.49 (q, *J* = 7.3 Hz, 8H, CH<sub>2</sub> of cation), 2.95-3.09 (m, 2H, NHCH<sub>2</sub>), 2.05 (broad signal, overlapping with solvent residual signal, 5H, BH), 1.95 (broad signal, 5H, BH), 1.50-1.32 (overlapping signals, 14H, CH<sub>3</sub> of cation, CH<sub>3</sub>CH<sub>2</sub>), 0.81 (t, *J* = 7.4 Hz, 3H, CH<sub>3</sub>CH<sub>2</sub>).

<sup>13</sup>C{<sup>1</sup>H} NMR (125 MHz, acetone-*d*<sub>6</sub>, 22°C): δ 165.96 (CO), 69.62 (cage C), 53.02 (CH<sub>2</sub> of cation), 42.27 (NHCH<sub>2</sub>), 23.23 (CH<sub>3</sub>CH<sub>2</sub>), 11.40 (CH<sub>3</sub>CH<sub>2</sub>), 7.69 (CH<sub>3</sub> of cation).

<sup>11</sup>B{<sup>1</sup>H} NMR (160 MHz, acetone-*d*<sub>6</sub>, 22°C): δ -11.64 (5B), -14.08 (5B), -17.00 (1B).

HRMS (ESI): *m/z* Calcd. for [C<sub>5</sub>H<sub>18</sub>B<sub>11</sub>INO]<sup>-</sup>, 354.1529; found, 354.1517.

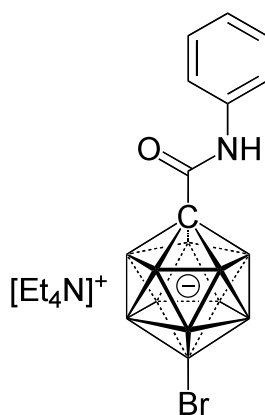

**4c:** The acid chloride [1-(C(O)Cl)-CB<sub>11</sub>H<sub>10</sub>-12-Br][Et<sub>4</sub>N] was prepared in a similar manner to **1** and collected as a precipitate in a glass frit. Prepared following the

general procedure for products **2**, using aniline as the substrate, **4c** (303 mg, 86% yield with respect to the carboxylic acid) was obtained as a white solid.

$^1\text{H}\{^{11}\text{B}\}$  NMR (400 MHz, acetone- $d_6$ , 22 °C):  $\delta$  8.14 (broad signal, 1H, NH), 7.66-7.55 (m, 2H, ArH), 7.33-7.23 (m, 2H, ArH), 7.10-7.00 (m, 1H, ArH), 3.47 (q,  $J = 7.3$  Hz, 8H,  $\text{CH}_2$  of cation), 2.05 (broad signal, overlapping with solvent residual signal, 5H, BH), 2.0 (broad signal, 5H, BH), 1.38 (tt,  $J = 7.3$  Hz, 1.9 Hz, 12H,  $\text{CH}_3$  of cation).

$^{13}\text{C}\{^1\text{H}\}$  NMR (100 MHz, acetone- $d_6$ , 22 °C):  $\delta$  164.39 (CO), 139.57, 129.40, 124.57, 120.58, 66.30 (cage C), 52.97 ( $\text{CH}_2$  of cation), 7.65 ( $\text{CH}_3$  of cation).

$^{11}\text{B}\{^1\text{H}\}$  NMR (160 MHz, acetone- $d_6$ , 22 °C):  $\delta$  -1.57 (1B), -12.12 (5B), -14.82 (5B).

HRMS (ESI):  $m/z$  Calcd. for  $[\text{C}_8\text{H}_{16}\text{B}_{11}\text{BrNO}]^-$ , 340.1512; found, 340.1539.

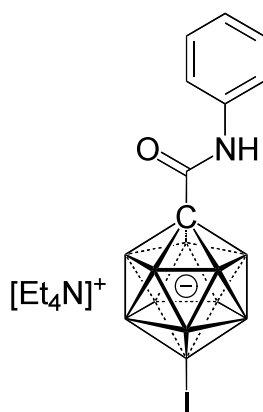

**4d**: The acid chloride  $[1-(\text{C}(\text{O})\text{Cl})\text{-CB}_{11}\text{H}_{10}\text{-12-I}][\text{Et}_4\text{N}]$  was prepared in a similar manner to **1** and collected as a precipitate in a glass frit. Prepared following the general procedure for products **2**, using aniline as the substrate, **4d** (350 mg, 90% yield with respect to the carboxylic acid) was obtained as a white solid.

$^1\text{H}\{^{11}\text{B}\}$  NMR (500 MHz, acetone- $d_6$ , 22 °C):  $\delta$  8.10 (broad signal, 1H, NH), 7.65-7.55 (m, 2H, ArH), 7.30-7.18 (m, 2H, ArH), 7.10-7.00 (m, 1H, ArH), 3.47 (q,  $J = 7.3$  Hz, 8H,  $\text{CH}_2$  of cation), 2.12 (broad signal, 5H, BH), 2.05 (broad signal, overlapping with solvent residual signal, 5H, BH), 1.38 (tt,  $J = 7.3$  Hz, 1.9 Hz, 12H,  $\text{CH}_3$  of cation).

$^{13}\text{C}\{^1\text{H}\}$  NMR (125 MHz, acetone- $d_6$ , 22 °C):  $\delta$  164.50 (CO), 139.54, 129.39, 124.58, 120.61, 69.81 (cage C), 52.99 ( $\text{CH}_2$  of cation), 7.67 ( $\text{CH}_3$  of cation).

$^{11}\text{B}\{^1\text{H}\}$  NMR (160 MHz, acetone- $d_6$ , 22 °C):  $\delta$  -11.41 (5B), -13.99 (5B), -16.71 (1B).



HRMS (ESI):  $m/z$  Calcd. for  $[\text{C}_8\text{H}_{16}\text{B}_{11}\text{INO}]^-$ , 388.1373; found, 388.1385.

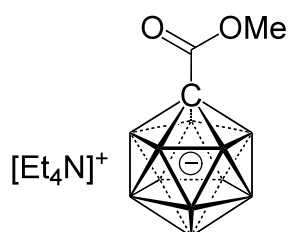

**5**: Prepared following the general procedure for products **2**, using methanol as the solvent. The reaction was conducted at 50 °C for 5 h. **5** (226 mg, 91% yield) was obtained as a white solid.

<sup>1</sup>H{<sup>11</sup>B} NMR (500 MHz, acetone-*d*<sub>6</sub>, 22 °C): δ 3.51 (s, 3H, OCH<sub>3</sub>), 3.48 (q,  $J=7.3$  Hz, 8H, CH<sub>2</sub> of cation), 1.93 (broad signal, 5H, BH), 1.78 (broad signal, 1H, BH), 1.60 (broad signal, 5H, BH), 1.39 (tt,  $J=7.3$  Hz, 1.9 Hz, 12H, CH<sub>3</sub> of cation).

<sup>13</sup>C{<sup>1</sup>H} NMR (125 MHz, acetone-*d*<sub>6</sub>, 22 °C): δ 167.73 (CO), 68.23 (cage C), 53.00 (CH<sub>2</sub> of cation), 52.81 (CO<sub>2</sub>CH<sub>3</sub>), 7.65 (CH<sub>3</sub> of cation).

<sup>11</sup>B{<sup>1</sup>H} NMR (160 MHz, acetone-*d*<sub>6</sub>, 22 °C): δ -6.10 (1B), -13.07 (5B), -14.00 (5B).

HRMS (ESI):  $m/z$  Calcd. for  $[\text{C}_3\text{H}_{14}\text{B}_{11}\text{O}_2]^-$ , 201.2090; found, 201.2095.

### c) Reduction of carborane amides **2** to give carborane amines **6**

To the amide **2** (0.5 mmol ) was added a solution of lithium aluminum hydride (1 M in THF, 5 mL). The reaction mixture was then stirred for 2 h at 25 °C. Water (10 mL) was slowly added, and the aqueous solution was acidified with concentrated HCl (pH = 2), followed by extraction with Et<sub>2</sub>O (3 x 50 mL). The combined organic layers were washed with water, dried over MgSO<sub>4</sub> and concentrated. Drying in a high vacuum at 25 °C afforded products **6**.

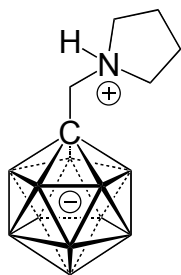

**6a:** Prepared following the above procedure, **6a** (88% yield) was obtained as a white solid.

$^1\text{H}\{^{11}\text{B}\}$  NMR (500 MHz, acetone- $d_6$ , 22 °C):  $\delta$  7.82 (broad signal, 1H, NH), 4.05-3.91 (m, 2H,  $\text{NCH}_2\text{CH}_2$ ), 3.75-3.70 (m, 2H,  $\text{C}(\text{cage})\text{CH}_2\text{N}$ ), 3.39-3.27 (m, 2H,  $\text{NCH}_2\text{CH}_2$ ), 2.27-2.07 (overlapping m, 4 H,  $\text{NCH}_2\text{CH}_2$ ), 1.77 (broad overlapping signals, 6H, BH), 1.66 (broad signal, 5H, BH).

$^{13}\text{C}\{^1\text{H}\}$  NMR (125 MHz, acetone- $d_6$ , 22 °C):  $\delta$  63.92, 63.38 (cage C), 58.16, 23.76.

$^{11}\text{B}\{^1\text{H}\}$  NMR (128 MHz, acetone- $d_6$ , 22 °C):  $\delta$  -7.37 (1B), -12.39 (5B), -14.08 (5B).

HRMS (ESI):  $m/z$  Calcd. for  $[\text{C}_6\text{H}_{21}\text{B}_{11}\text{N}]^-$ , 226.2770; found, 226.2786.

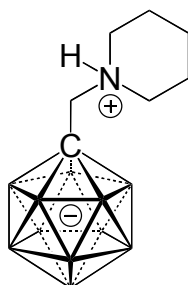

**6b:** Prepared following the above procedure, **6b** (91% yield) was obtained as a white solid.

$^1\text{H}\{^{11}\text{B}\}$  NMR (500 MHz, acetone- $d_6$ , 22 °C):  $\delta$  7.03 (broad signal, 1H, NH), 3.95-3.80 (m, 2H,  $\text{NCH}_2\text{CH}_2$ ), 3.67-3.55 (m, 2H,  $\text{C}(\text{cage})\text{CH}_2\text{N}$ ), 3.27-3.12 (m, 2H,  $\text{NCH}_2\text{CH}_2$ ), 2.04-1.90 (overlapping m, 4 H,  $\text{NCH}_2\text{CH}_2$ ), 1.89-1.45 (overlapping signals, 13H,  $\text{CH}_2$  and BH).

$^{13}\text{C}\{^1\text{H}\}$  NMR (125 MHz, acetone- $d_6$ , 22 °C):  $\delta$  64.60, 62.61 (cage C), 56.69, 22.82, 21.98.

$^{11}\text{B}\{^1\text{H}\}$  NMR (128 MHz, acetone- $d_6$ , 22 °C):  $\delta$  -7.21 (1B), -12.40 (5B), -14.04(5B).  
HRMS (ESI):  $m/z$  Calcd. for  $[\text{C}_7\text{H}_{23}\text{B}_{11}\text{N}]^-$ , 240.2927; found, 240.2952.

### III X-ray Crystallography

#### Crystal structure of 2e (CCDC 1829932)

Compound 2e (15 mg) was dissolved in acetonitrile (1.0 mL) in a 4 mL glass vial to give a clear colorless solution. An aqueous solution of NaCl (1 equiv in 0.1 mL) was added. Slow evaporation afforded colorless crystals of the composition  $[\text{Na}][\text{Et}_4\text{N}][\text{C}_3\text{H}_{15}\text{B}_{11}\text{NO}_2]_2$  suitable for X-ray diffraction within 5 d at 25 °C.

---

|                                                                      |                                               |                                                |                        |
|----------------------------------------------------------------------|-----------------------------------------------|------------------------------------------------|------------------------|
| <b>Bond precision:</b>                                               | <b>C-C = 0.0098 Å</b>                         | <b>Wavelength=0.71073</b>                      |                        |
| <b>Cell:</b>                                                         | <b>a=7.6610(3)</b>                            | <b>b=14.6847(11)</b>                           | <b>c=30.005(2)</b>     |
|                                                                      | <b>alpha=88.511(6)</b>                        | <b>beta=89.235(4)</b>                          | <b>gamma=85.054(5)</b> |
| <b>Temperature:</b>                                                  | <b>170 K</b>                                  |                                                |                        |
|                                                                      | <b>Calculated</b>                             | <b>Reported</b>                                |                        |
| <b>Volume</b>                                                        | <b>3361.6(4)</b>                              | <b>3361.6(4)</b>                               |                        |
| <b>Space group</b>                                                   | <b>P -1</b>                                   | <b>P -1</b>                                    |                        |
| <b>Hall group</b>                                                    | <b>-P 1</b>                                   | <b>-P 1</b>                                    |                        |
| <b>Moiety formula</b>                                                | <b>C12 H60 B44 N4 Na2 O8,<br/>2(C8 H20 N)</b> | <b>2(C6 H30 B22 N2 Na O4),<br/>2(C8 H20 N)</b> |                        |
| <b>Sum formula</b>                                                   | <b>C28 H100 B44 N6 Na2 O8</b>                 | <b>C28 H100 B44 N6 Na2 O8</b>                  |                        |
| <b>Mr</b>                                                            | <b>1170.76</b>                                | <b>1170.76</b>                                 |                        |
| <b>Dx, g cm<sup>-3</sup></b>                                         | <b>1.157</b>                                  | <b>1.157</b>                                   |                        |
| <b>Z</b>                                                             | <b>2</b>                                      | <b>2</b>                                       |                        |
| <b>Mu (mm<sup>-1</sup>)</b>                                          | <b>0.076</b>                                  | <b>0.076</b>                                   |                        |
| <b>F000</b>                                                          | <b>1232.0</b>                                 | <b>1232.0</b>                                  |                        |
| <b>F000'</b>                                                         | <b>1232.40</b>                                |                                                |                        |
| <b>h,k,lmax</b>                                                      | <b>9,17,36</b>                                | <b>9,17,36</b>                                 |                        |
| <b>Nref</b>                                                          | <b>12324</b>                                  | <b>12230</b>                                   |                        |
| <b>Tmin,Tmax</b>                                                     | <b>0.963,0.976</b>                            | <b>0.929,1.000</b>                             |                        |
| <b>Tmin'</b>                                                         | <b>0.963</b>                                  |                                                |                        |
| <b>Correction method= # Reported T Limits: Tmin=0.929 Tmax=1.000</b> |                                               |                                                |                        |
| <b>AbsCorr = MULTI-SCAN</b>                                          |                                               |                                                |                        |
| <b>Data completeness=</b>                                            | <b>0.992</b>                                  | <b>Theta(max)=</b>                             | <b>25.350</b>          |
| <b>R(reflections)=</b>                                               | <b>0.1413( 9444)</b>                          | <b>wR2(reflections)=</b>                       | <b>0.3087( 12230)</b>  |
| <b>S =</b>                                                           | <b>1.146</b>                                  | <b>Npar=</b>                                   | <b>805</b>             |

---

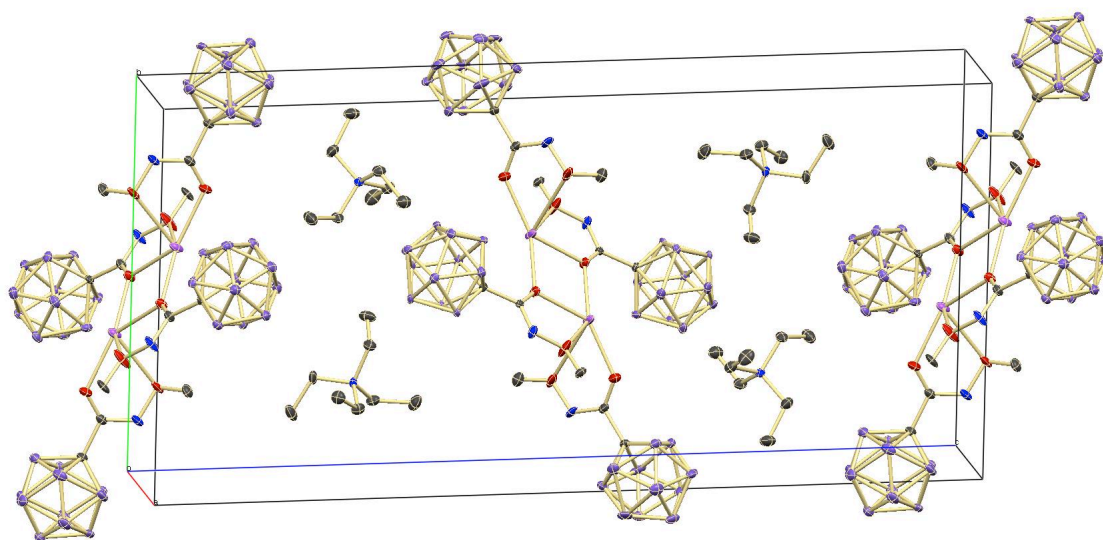

**Figure S3.** Unit cell of  $[\text{Na}][\text{Et}_4\text{N}][\text{C}_3\text{H}_{15}\text{B}_{11}\text{NO}_2]_2$ . Hydrogen atoms are omitted for clarity; 30% displacement ellipsoids.

The unit cell has the composition  $[\text{Na}]_4[\text{Et}_4\text{N}]_4[\text{C}_3\text{H}_{15}\text{B}_{11}\text{NO}_2]_8$ , whereby two similar  $\{[\text{Na}][\text{Et}_4\text{N}][\text{C}_3\text{H}_{15}\text{B}_{11}\text{NO}_2]\}_2$  dimers are present (Fig. S1). O–Na coordination is observed, while the  $[\text{Et}_4\text{N}]^+$  cations are well-separated from the clusters. This structure features a  $wR_2$  value of 0.3087, which is mainly attributed to the relatively large differences in anisotropic displacement parameters for the O and N atoms of the amide groups. This is most likely the result of a slight disorder or rotational flexibility of the methoxyamide group in the crystal. The connectivity of all atoms of the anions and cations is unambiguous.

## Crystal structure of 2m (CCDC 1829933)

Compound **2m** (15 mg, 0.029 mmol) was dissolved in acetone (0.5 mL) a 1 mL glass vial. The resulting colorless solution was filtered into a 18 cm long NMR tube and layered with hexanes (1 mL). Colorless crystals of the composition [Et<sub>4</sub>N][C<sub>8</sub>H<sub>16</sub>B<sub>11</sub>INO] suitable for X-ray diffraction grew within 5 d at 25 °C.

---

|                        |                                            |                            |                 |
|------------------------|--------------------------------------------|----------------------------|-----------------|
| Bond precision:        | C-C = 0.0095 Å                             | Wavelength=1.34139         |                 |
| Cell:                  | a=9.1861(5)                                | b=11.3166(6)               | c=13.6234(6)    |
|                        | alpha=71.718(3)                            | beta=83.920(4)             | gamma=72.759(4) |
| Temperature:           | 170 K                                      |                            |                 |
|                        | Calculated                                 | Reported                   |                 |
| Volume                 | 1284.19(12)                                | 1284.19(12)                |                 |
| Space group            | P -1                                       | P -1                       |                 |
| Hall group             | -P 1                                       | -P 1                       |                 |
| Moiety formula         | C8 H16 B11 I N O, C8 H20 N                 | C8 H16 B11 I N O, C8 H20 N |                 |
| Sum formula            | C16 H36 B11 I N2 O                         | C16 H36 B11 I N2 O         |                 |
| Mr                     | 518.28                                     | 518.28                     |                 |
| Dx, g cm <sup>-3</sup> | 1.340                                      | 1.340                      |                 |
| Z                      | 2                                          | 2                          |                 |
| Mu (mm <sup>-1</sup> ) | 6.759                                      | 6.601                      |                 |
| F000                   | 524.0                                      | 524.0                      |                 |
| F000'                  | 524.81                                     |                            |                 |
| h, k, lmax             | 11, 13, 16                                 | 11, 13, 16                 |                 |
| Nref                   | 4881                                       | 4856                       |                 |
| Tmin, Tmax             | 0.788, 0.876                               | 0.373, 0.751               |                 |
| Tmin'                  | 0.719                                      |                            |                 |
| Correction method=     | # Reported T Limits: Tmin=0.373 Tmax=0.751 |                            |                 |
| AbsCorr =              | MULTI-SCAN                                 |                            |                 |
| Data completeness=     | 0.995                                      | Theta(max)=                | 54.958          |
| R(reflections)=        | 0.0664( 3609)                              | wR2(reflections)=          | 0.1905( 4856)   |
| S =                    | 1.011                                      | Npar=                      | 285             |

---

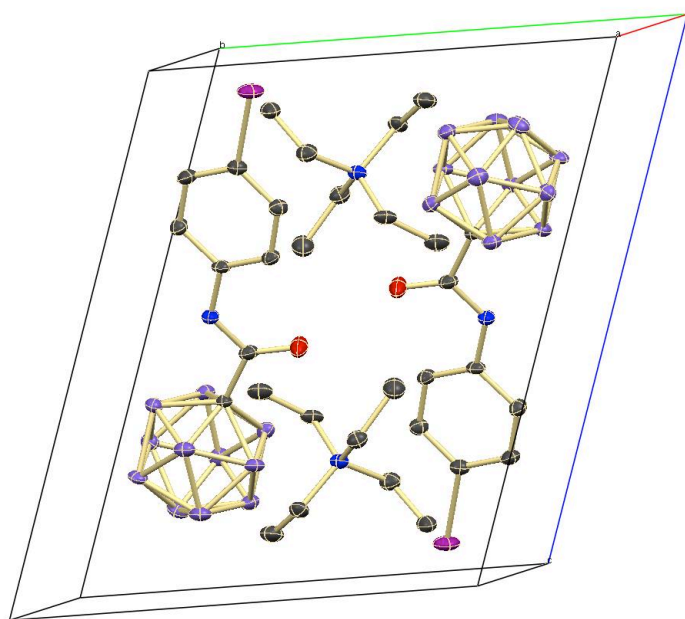

**Figure S4.** Unit cell of  $[\text{Et}_4\text{N}][\text{C}_8\text{H}_{16}\text{B}_{11}\text{INO}]$ . Hydrogen atoms are omitted for clarity; 30% displacement ellipsoids.

The unit cell has the composition  $[\text{Et}_4\text{N}]_2[\text{C}_8\text{H}_{16}\text{B}_{11}\text{INO}]_2$ , with a center of inversion relating the two  $[\text{Et}_4\text{N}][\text{C}_8\text{H}_{16}\text{B}_{11}\text{INO}]$  units (Fig. S2). The structure was solved without any unusual features.

## IV References

- [1] Y. Shen, Y. Pan, K. Zhang, X. Liang, J. Liu, B. Spingler, S. Duttwyler, *Dalton Trans.* **2017**, *46*, 3135.
- [2] J. R. Holmes, D. Kivelson, W. C. Drinkard, *J. Chem. Phys.* **1962**, *37*, 150–152;  
a more recent summary is available online from the Sigma-Aldrich company:  
[https://www.sigmaaldrich.com/content/dam/sigma-aldrich/docs/Aldrich/General\\_Information/double\\_water\\_peaks.pdf](https://www.sigmaaldrich.com/content/dam/sigma-aldrich/docs/Aldrich/General_Information/double_water_peaks.pdf)
- [3] J. Kahlert, L. Böhling, A. Brockhinke, H.-G. Stammer, B. Neumann, L. M. Rendina, P. J. Low, L. Weber, M. A. Fox, *Dalton Trans.* **2015**, *44*, 9766.
- [4] E. Justus, K. Rischka, J. F. Wishart, K. Werner, D. Gabel, *Chem. Eur. J.* **2008**, *14*, 1918 and references cited therein.

## V NMR Spectra

Following on p. NMR1–NMR80

## V Mass Spectra

Following on p. MS1–MS20



**[Et<sub>4</sub>N][CB<sub>11</sub>H<sub>11</sub>-COCl], ca. 8mg in CD<sub>3</sub>CN \***  
**<sup>1</sup>H{<sup>11</sup>B} NMR, 400 MHz, T = 22 C**

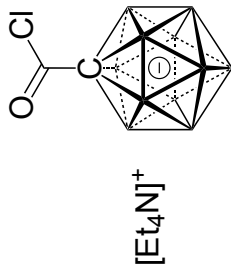

Current Data Parameters  
 NAME 20180203\_PVT\_acid\_chloride  
 EXPNO 1  
 PROCNO 1

F2 - Acquisition Parameters  
 Date\_ 20160315  
 Time 19.20  
 INSTRUM spect  
 PROBHD 5 mm PABBO BB/  
 PULPROG zgpg30  
 TD 16384  
 SOLVENT Acetone  
 NS 16  
 DS 4  
 SWH 8012.820 Hz  
 FIDRES 0.489064 Hz  
 AQ 1.02223616 sec  
 RG 64.43  
 DW 62.400 usec  
 DE 6.50 usec  
 TE 294.1 K  
 D1 1.00000000 sec  
 D11 0.03000000 sec  
 TDO 1

==== CHANNEL f1 =====  
 NUC1 1H  
 P1 15.00 usec  
 PLW1 12.5000000 W  
 SFO1 400.1320007 MHz

==== CHANNEL f2 =====  
 CPDPRG[2] garp4  
 NUC2 11B  
 P1 90.00 usec  
 PLW2 52.9659960 W  
 PLW12 0.6447998 W  
 SFO2 128.3776050 MHz

F2 - Processing parameters  
 SI 32768  
 SF 400.1300560 MHz  
 WDW EM  
 SSB 0  
 LB 1.00 Hz  
 GB 0  
 PC 1.40

3.19  
3.17  
3.15  
3.13

1.97  
1.94  
1.94  
1.78  
1.59  
1.23  
1.22  
1.22  
1.21  
1.21  
1.20  
1.19  
1.19  
1.18

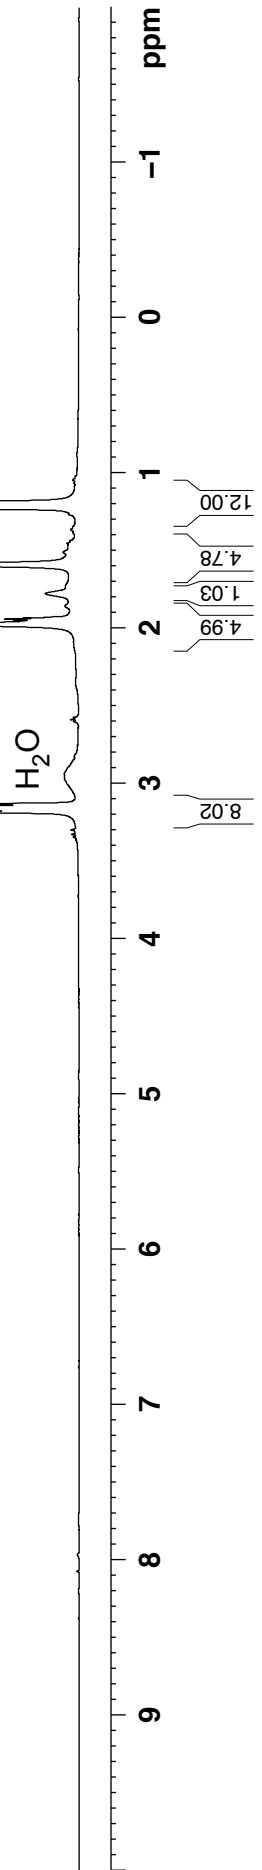

20160314\_pyn-2084-0258-3 [Et4N][CB11H11-COCl], ca. 8 mg in acetone-d6  
 11B NMR, Bruker 500MHz. T=22C

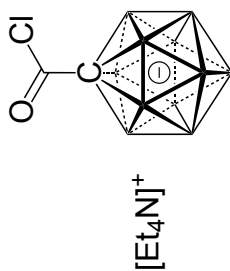

Current Data Parameters  
 NAME 20180203\_pyn\_acid\_chloride  
 EXPNO 3  
 PROCNO 1

F2 - Acquisition Parameters

Date\_ 20160315  
 Time\_ 19.32  
 INSTRUM spect  
 PROBHD 5 mm PABBO BB/  
 PULPROG zg  
 TD 65536  
 SOLVENT Acetone  
 NS 128  
 DS 4  
 SWH 25510.203 Hz  
 FIDRES 0.389255 Hz  
 AQ 1.2845056 sec  
 RG 193.34  
 DW 19.600 usec  
 DE 6.50 usec  
 TE 293.8 K  
 D1 1.0000000 sec  
 TD0 1

==== CHANNEL f1 =====  
 NUC1 11B  
 P1 9.93 usec  
 PLW1 52.9659960 W  
 SF01 128.3776052 MHz

F2 - Processing parameters  
 SI 32768  
 SF 128.3776050 MHz  
 EM  
 WDW 0  
 SSB 0  
 LB 10.00 Hz  
 GB 0  
 PC 1.40

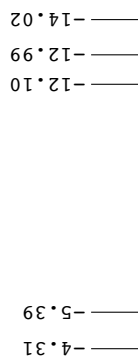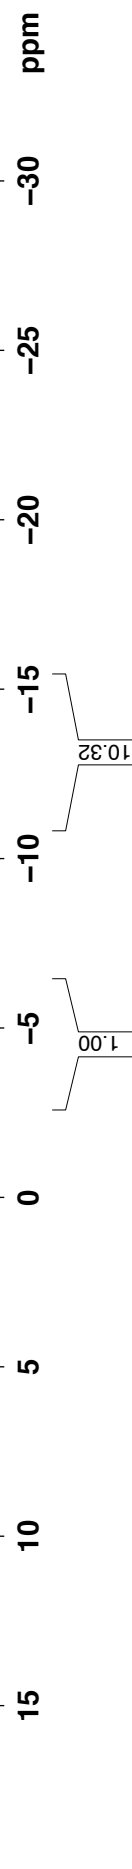

**[Et<sub>4</sub>N][CB11H<sub>11</sub>-COCl], ca. 8mg in CD<sub>3</sub>CN  
<sup>11</sup>B{<sup>1</sup>H} NMR, 128 MHz, T = 22 C**

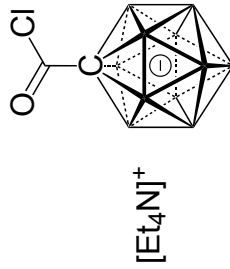

Current Data Parameters  
 NAME 20180203\_pyn\_acid\_chloride  
 EXPNO 2  
 PROCNO 1

F2 - Acquisition Parameters  
 Date\_ 20160315  
 Time\_ 19.26  
 INSTRUM spect  
 PROBHD 5 mm PABBO BB/  
 PULPROG zgpg30  
 TD 65536  
 SOLVENT Acetone  
 NS 128  
 DS 4  
 SWH 25510.203 Hz  
 FIDRES 0.389255 Hz  
 AQ 1.2845056 sec  
 RG 193.34  
 DW 19.600 usec  
 DE 6.50 usec  
 TE 294.6 K  
 D1 1.00000000 sec  
 D11 0.03000000 sec  
 TD0 1

==== CHANNEL f1 =====  
 NUC1 <sup>11</sup>B  
 P1 9.93 usec  
 PLW1 52.9659960 W  
 SFO1 128.3776050 MHz

==== CHANNEL f2 =====  
 CPDPRG[2] waltz16  
 NUC2 <sup>1</sup>H  
 PCPD2 80.00 usec  
 PLW2 12.50000000 W  
 PLW12 0.43945000 W  
 PLW13 0.28125000 W  
 SFO2 400.1320007 MHz

F2 - Processing parameters  
 SI 32768  
 SF 128.3776050 MHz  
 EM  
 WDW 0  
 SSB 0  
 LB 10.00 Hz  
 GB 0  
 PC 1.40

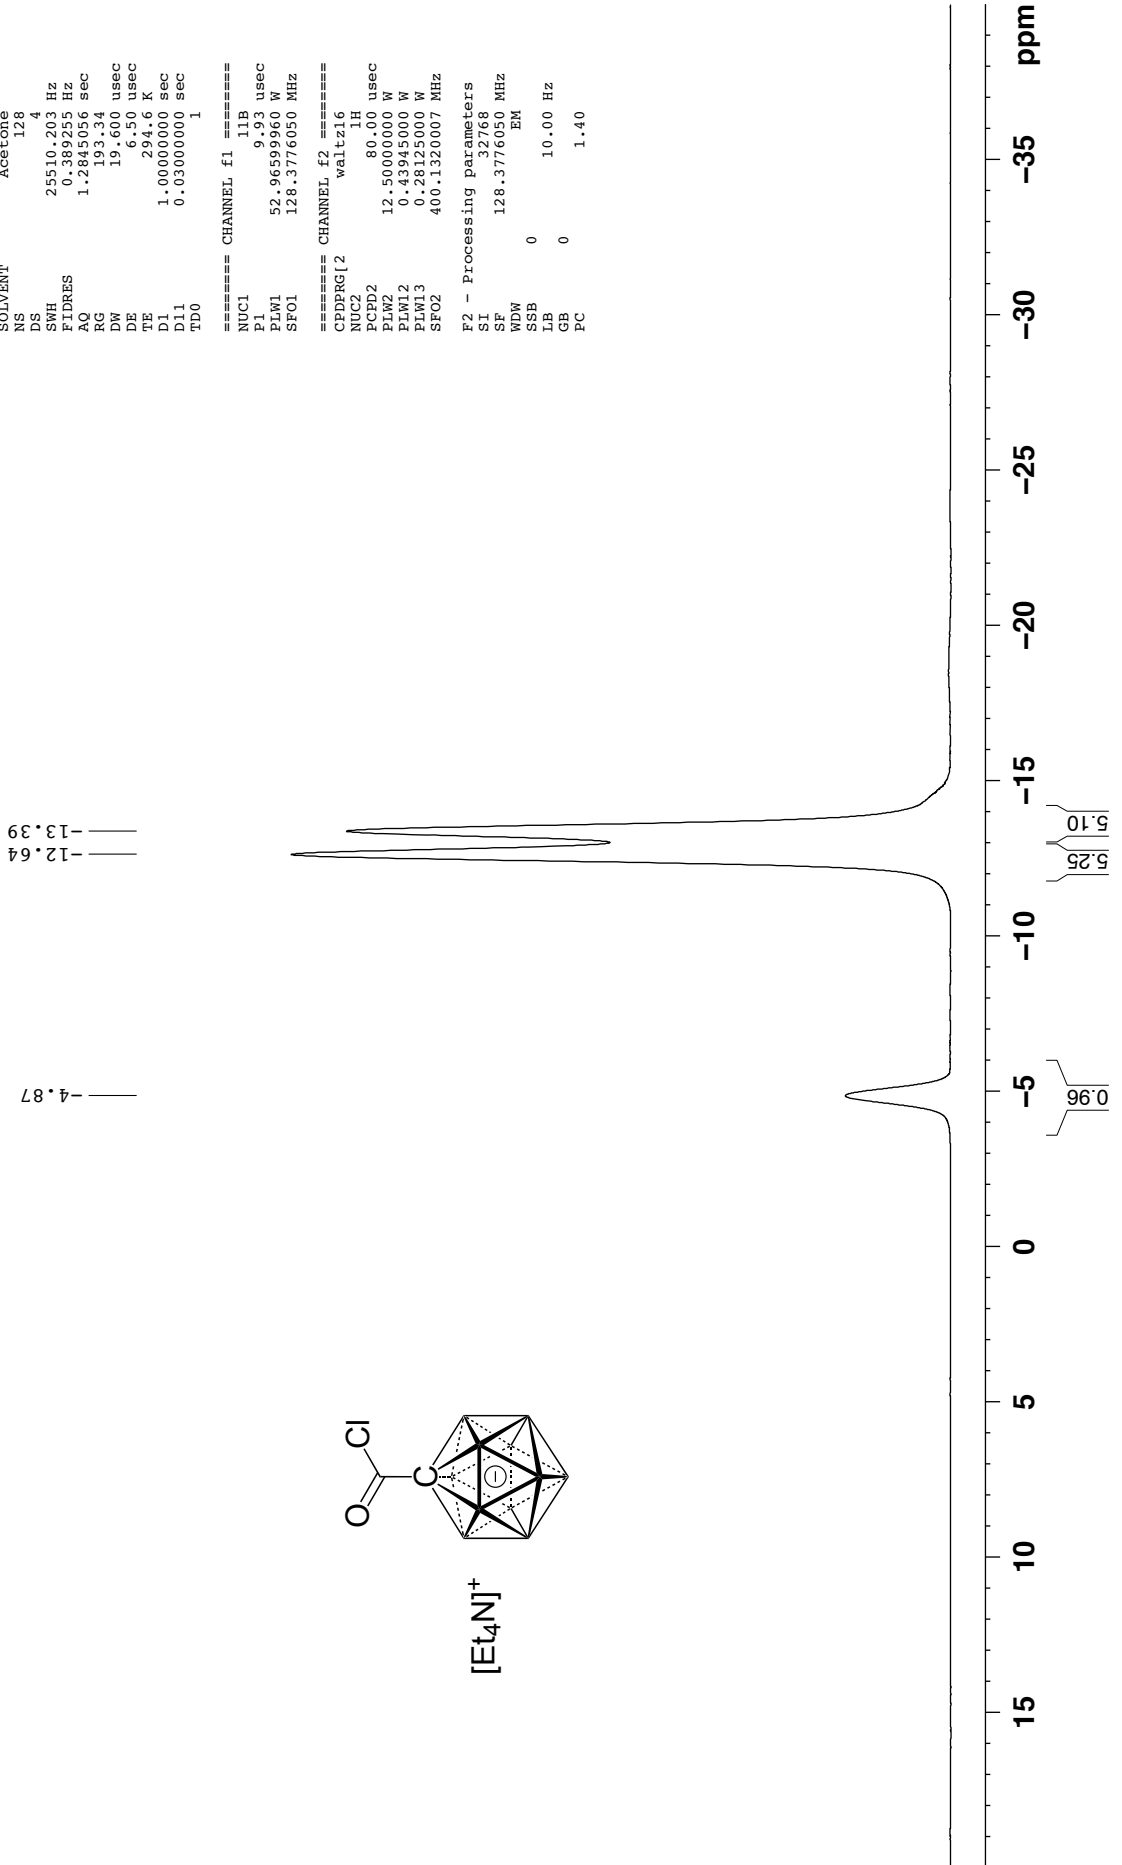

[Et<sub>4</sub>N][CB11H<sub>11</sub>-COCl], ca. 8mg in CD<sub>3</sub>CN\*  
13C{1H} NMR, 100 MHz, T = 22 C

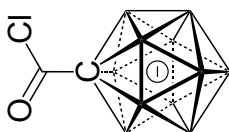

[Et<sub>4</sub>N]<sup>+</sup>

NMR4

Current Data Parameters  
NAME 20180203\_pyn\_acid\_chloride  
EXPNO 4  
PROCNO 1

F2 - Acquisition Parameters  
Date\_ 20160315  
Time\_ 20.19  
INSTRUM spect  
PROBHD 5 mm PABBO BB/  
PULPROG zgpg30  
TD 65336  
SOLVENT Acetone  
NS 1024

DS 4  
SWH 29761.904 Hz  
AQ 0.454131 Hz  
FIDRES 1.1010048 sec  
RG 193.34  
DW 16.800 usec  
DE 6.50 usec  
TE 295.7 K  
D1 1.5000000 sec  
D11 0.0300000 sec  
TDO 1

==== CHANNEL f1 =====  
NUC1 13C  
P1 10.00 usec  
PLW1 53.000000 W  
SFO1 100.6228293 MHz

==== CHANNEL f2 =====  
CPDPRG[2] waltz16  
NUC2 1H  
PCPD2 80.00 usec  
PLW2 12.5000000 W  
PLW12 0.43945000 W  
PLW13 0.28125000 W  
SFO2 400.1316005 MHz

F2 - Processing parameters  
SI 32768  
SF 100.6126670 MHz  
WDW EM  
SSB 0  
LB 7.00 Hz  
GB 0  
PC 1.40

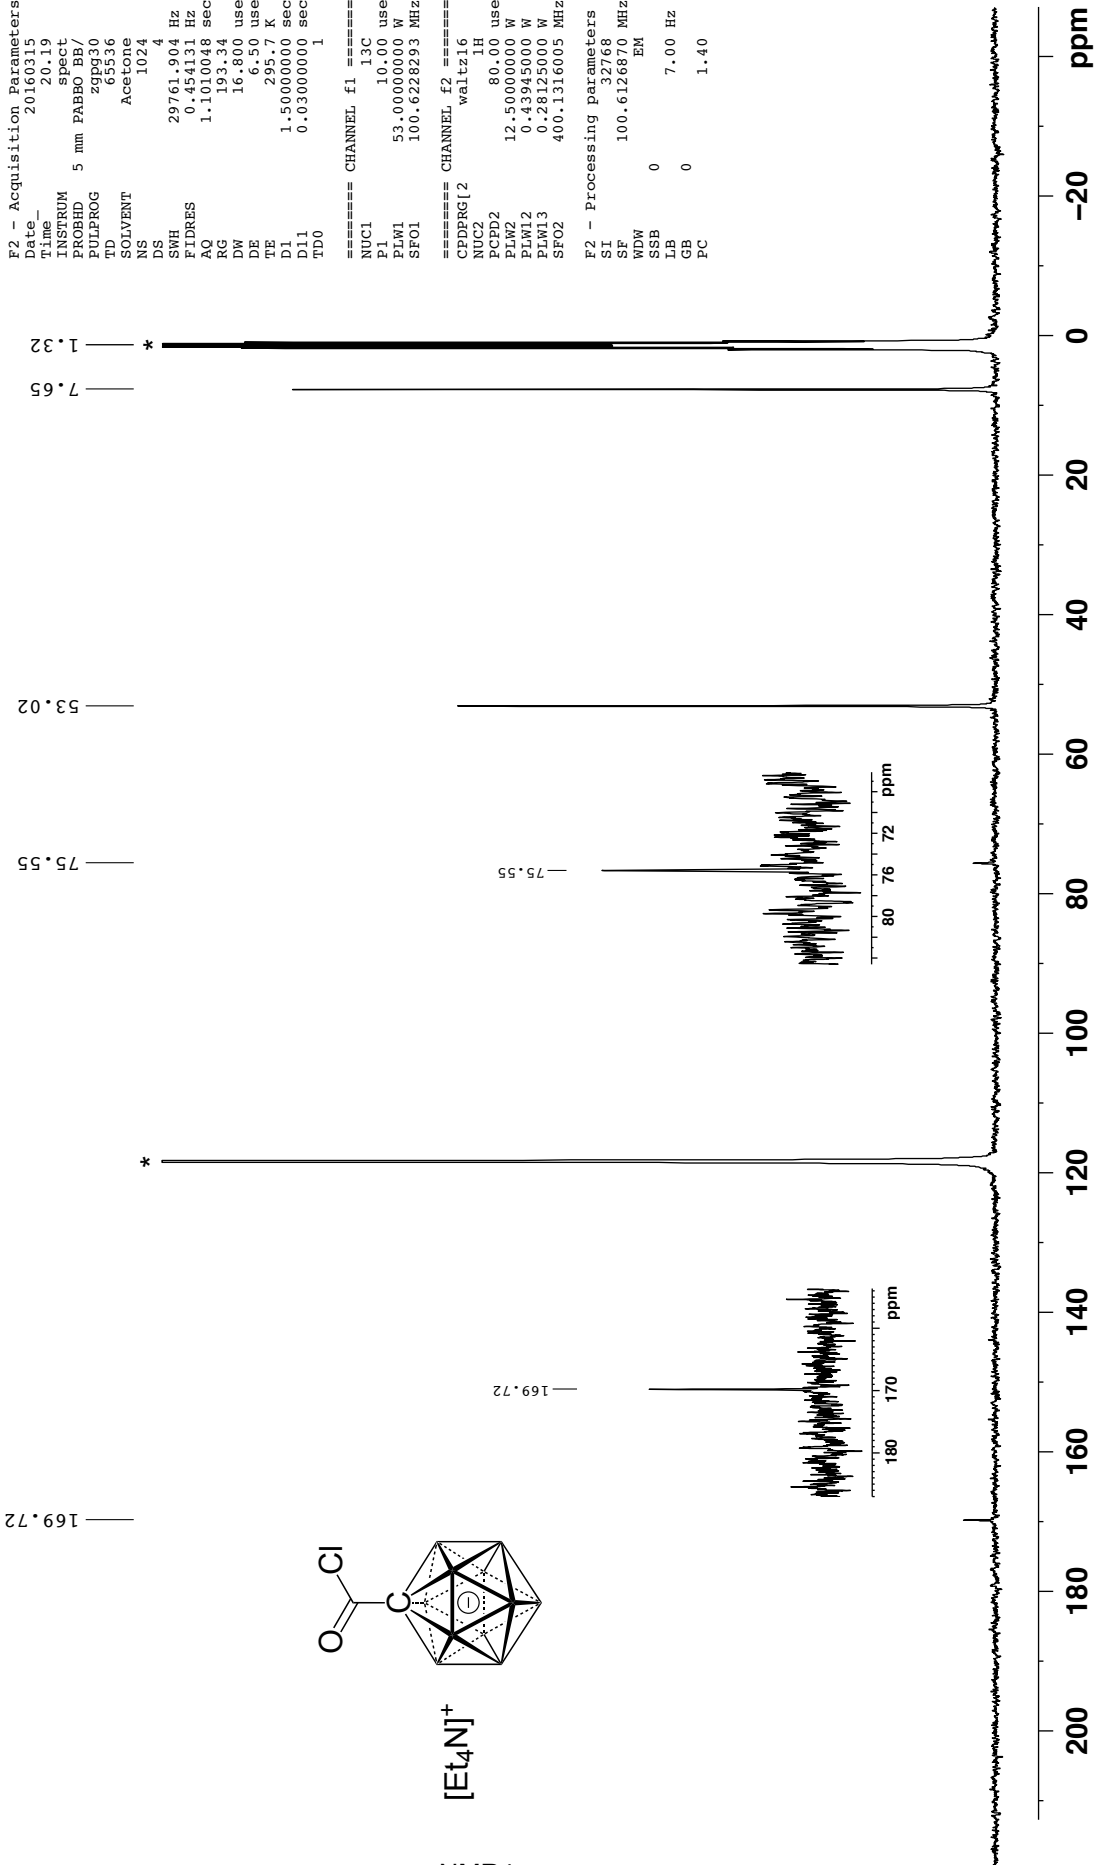

Current Data Parameters  
 NAME 20180203\_20160105-pyn-Mea  
 EXPNO 4  
 PROCNO 1

F2 - Acquisition Parameters  
 Date\_ 20160106  
 Time\_ 15.42  
 INSTRUM spect  
 PROBHD 5 mm PABBO BB/  
 PULPROG zgpg30  
 TD 16384  
 SOLVENT Acetone  
 NS 16  
 DS 4  
 SWH 8012.820 Hz  
 FIDRES 0.489064 Hz  
 AQ 1.0223616 sec  
 RG 55.74  
 DW 62.400 usec  
 DE 6.50 usec  
 TE 294.7 K  
 D1 1.0000000 sec  
 D11 0.0300000 sec  
 TDO 1

==== CHANNEL f1 =====  
 NUC1 1H  
 P1 15.00 usec  
 PLW1 12.5000000 W  
 SFO1 400.1320007 MHz

==== CHANNEL f2 =====  
 CPDPRG[2] gart4  
 NUC2 11B  
 PCPD2 90.00 usec  
 PLW2 52.9659960 W  
 PLM12 0.64477998 W  
 SFO2 128.3776050 MHz

F2 - Processing parameters  
 SI 32768  
 SF 400.1300078 MHz  
 WDW EM  
 SSB 0  
 LB 0  
 GB 0  
 PC 1.40

Me amide, ca. 14 mg in acetone-d6 \*  
 1H{11B} NMR, 400 MHz, T = 22 C

6.49  
 3.50  
 3.48  
 3.46  
 3.45  
 2.60  
 2.59  
 2.05  
 1.90  
 1.73  
 1.59  
 1.40  
 1.39  
 1.37

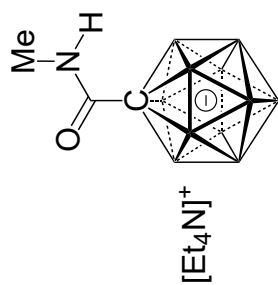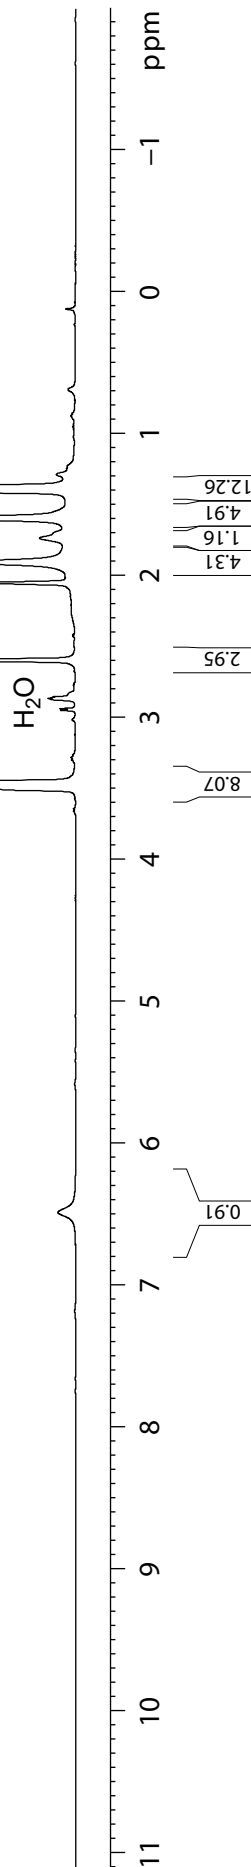

**Me amide, ca. 14 mg in acetone-d6  
11B NMR, 160 MHz, T = 22 C**

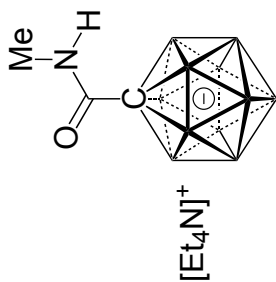

```

Current Data Parameters
NAME 20180203_20160122-pyn-2-Me
EXPNO 3
PROCNO 1

F2 - Acquisition Parameters
Date_ 20160122
Time 17.50
INSTRUM spect
PROBHD 5 mm PABBO BB-
PULPROG zg
TD 64098
SOLVENT C6D6
NS 32
DS 0
SWH 32051.281 Hz
FIDRES 0.500036 Hz
AQ 0.9999288 sec
RG 203
DW 15.600 usec
DE 16.00 usec
TE 292.8 K
D1 1.00000000 sec

===== CHANNEL f1 =====
NUC1 11B
P1 10.00 usec
PLW1 75.00000000 W
SFO1 160.4615792 MHz

F2 - Processing parameters
SI 32768
SF 160.4615993 MHz
WDW EM
SSB 0
LB 10.00 Hz
GB 0
PC 1.40
  
```

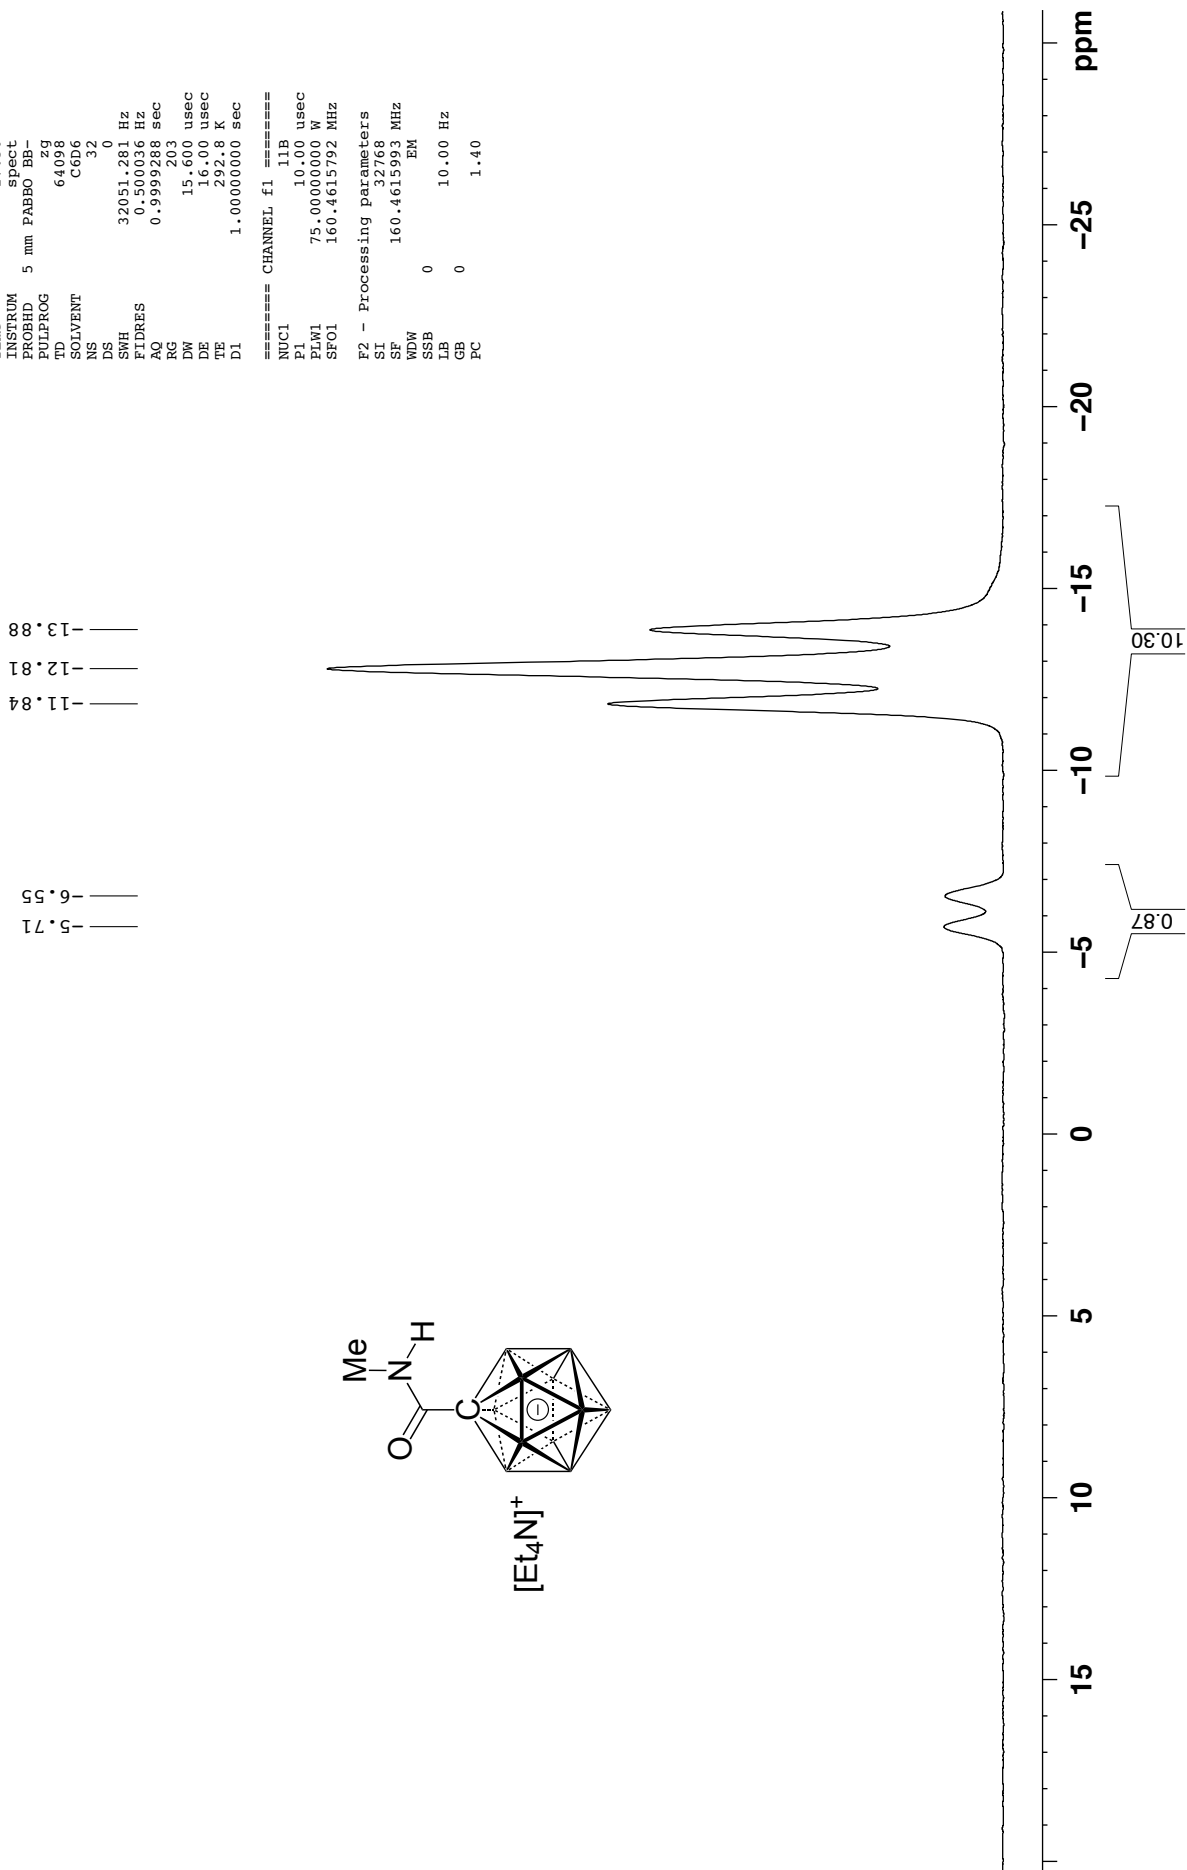

**Me amide, ca. 14 mg in acetone-d6  
11B{1H} NMR, 160 MHz, T = 22 C**

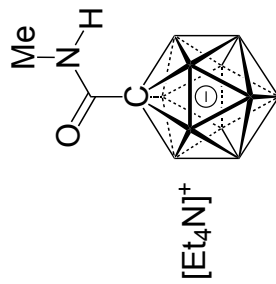

```

Current Data Parameters
NAME      20180203_20160122-pyh-2-Me
EXPNO    2
PROCNO   1

F2 - Acquisition Parameters
Date_    20160122
Time     17.48
INSTRUM spect
PROBHD   5 mm PABBO BB-
PULPROG zgpg30
TD       65536
SOLVENT  C6D6
NS       26
DS       0
SWH      32051.281 Hz
FIDRES   0.489064 Hz
AQ       1.0223616 sec
RG       203
DW       15.600 usec
DE       6.50 usec
TE       293.1 K
D1       5.00000000 sec
D11      0.03000000 sec

===== CHANNEL f1 =====
NUC1     11B
P1       10.00 usec
PLW1     75.0000000 W
SFO1     160.4615792 MHz

===== CHANNEL f2 =====
CPDPRG[2 waltz16
NUC2     1H
PCPD2    80.00 usec
PLW2     19.0000000 W
PLW12    0.42750001 W
PLW13    0.27360001 W
SFO2     500.1330885 MHz

F2 - Processing parameters
SI       32768
SF       160.4615993 MHz
WDW      EM
SSB      0
LB       10.00 Hz
GB       0
PC       1.40
  
```

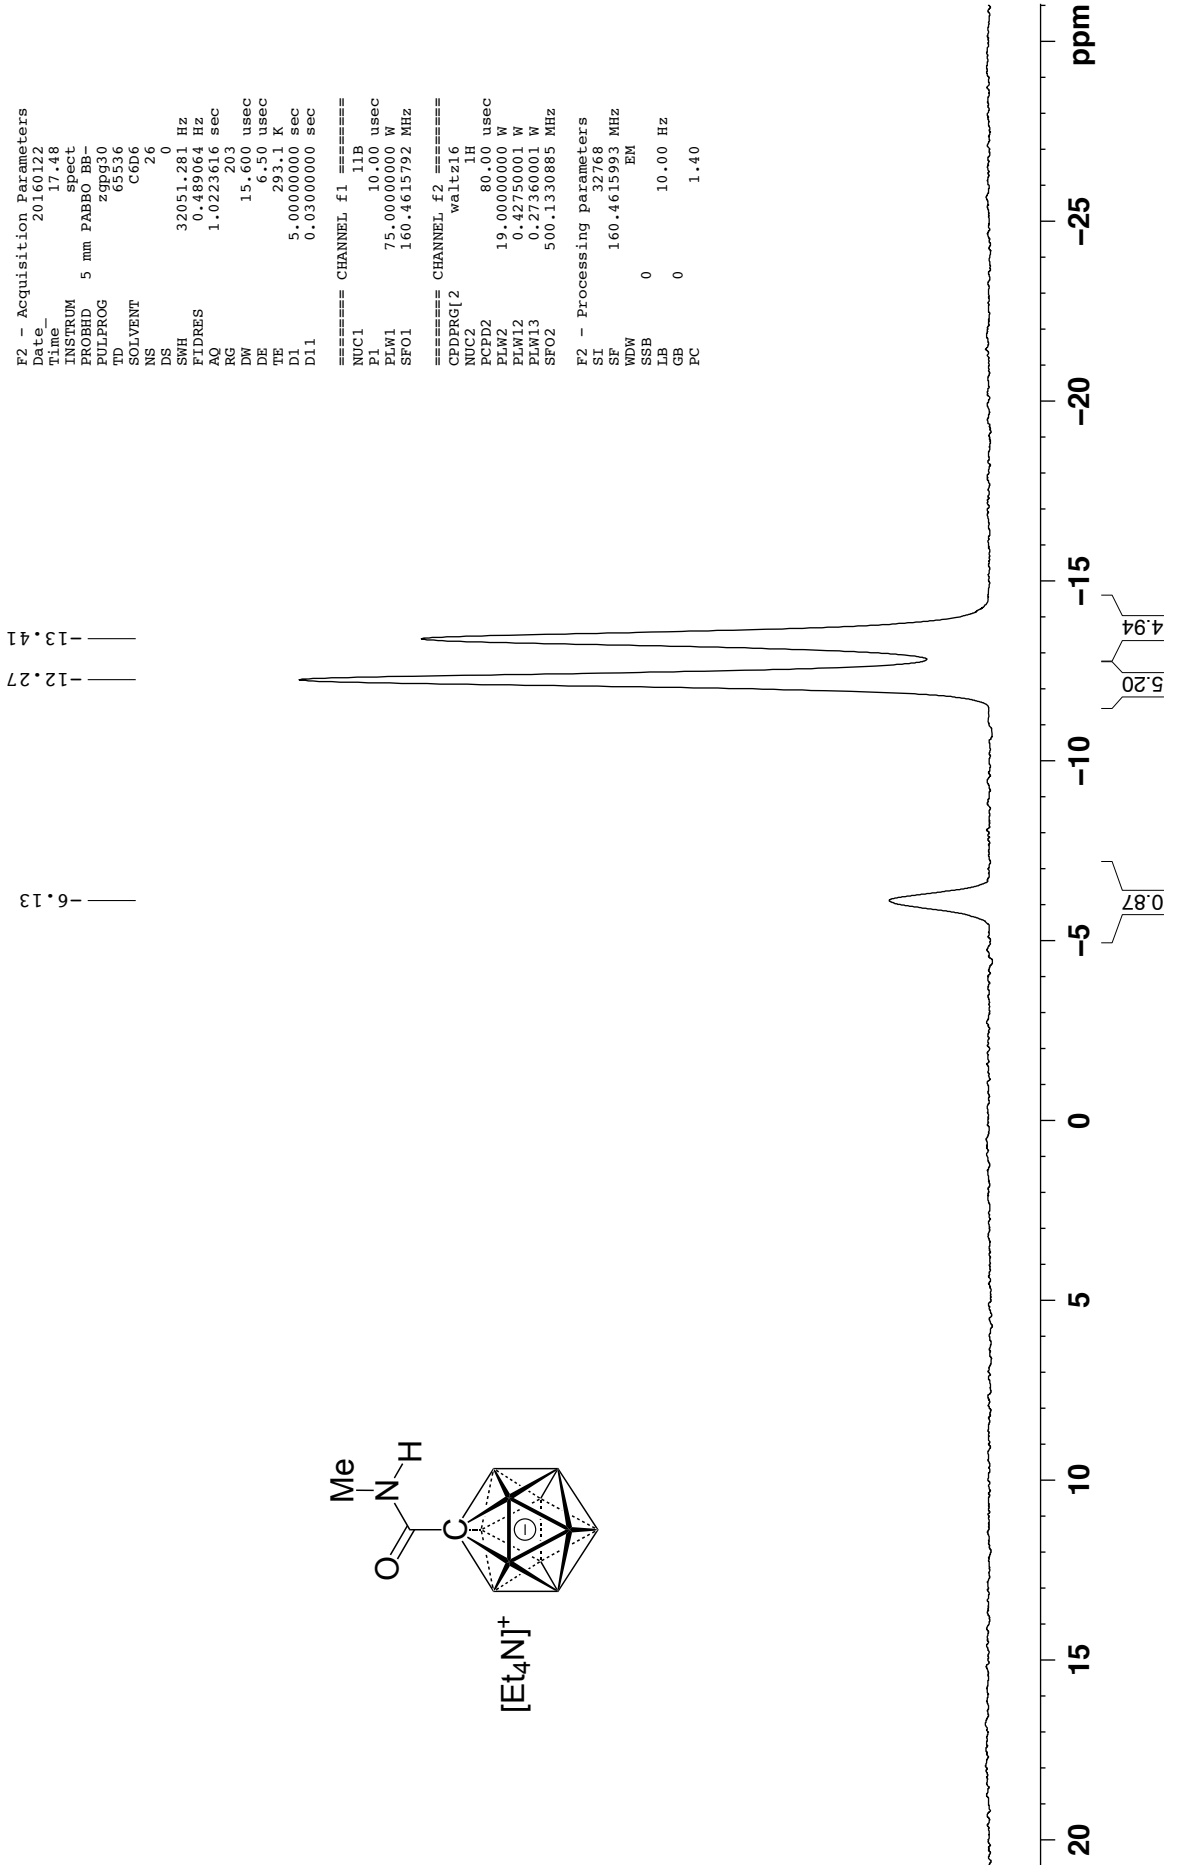

**Me amide, ca. 14 mg in acetone-d6 \***  
**<sup>13</sup>C{<sup>1</sup>H} NMR, 101 MHz, T = 22 C**

```

Current Data Parameters
NAME      20180203_20160105-pyn-Mear
EXPNO    3
PROCNO   1

F2 - Acquisition Parameters
Date_    20160106
Time     15.40
INSTRUM spect
PROBHD   5 mm PABBO BB/
PULPROG zgpg30
TD       65536
SOLVENT  Acetone
NS       512
DS       4
SWH      29761.904 Hz
FIDRES   0.454131 Hz
AQ       1.1010048 sec
RG       193.34
DW       16.800 usec
DE       6.50 usec
TE       295.0 K
D1       1.5000000 sec
D11      0.0300000 sec
TD0      1

===== CHANNEL f1 =====
NUC1     13C
P1       10.00 usec
PLW1     53.0000000 W
SFO1     100.6228293 MHz

===== CHANNEL f2 =====
CPDPRG2  waltz16
NUC2     1H
P2       80.00 usec
PLW2     12.5000000 W
PLW12    0.43945000 W
PLW13    0.28125000 W
SFO2     400.1316005 MHz

F2 - Processing parameters
SI       262144
SF       100.6127234 MHz
WDW      EM
SSB      0
LB       8.00 Hz
GB       0
PC       1.40
    
```

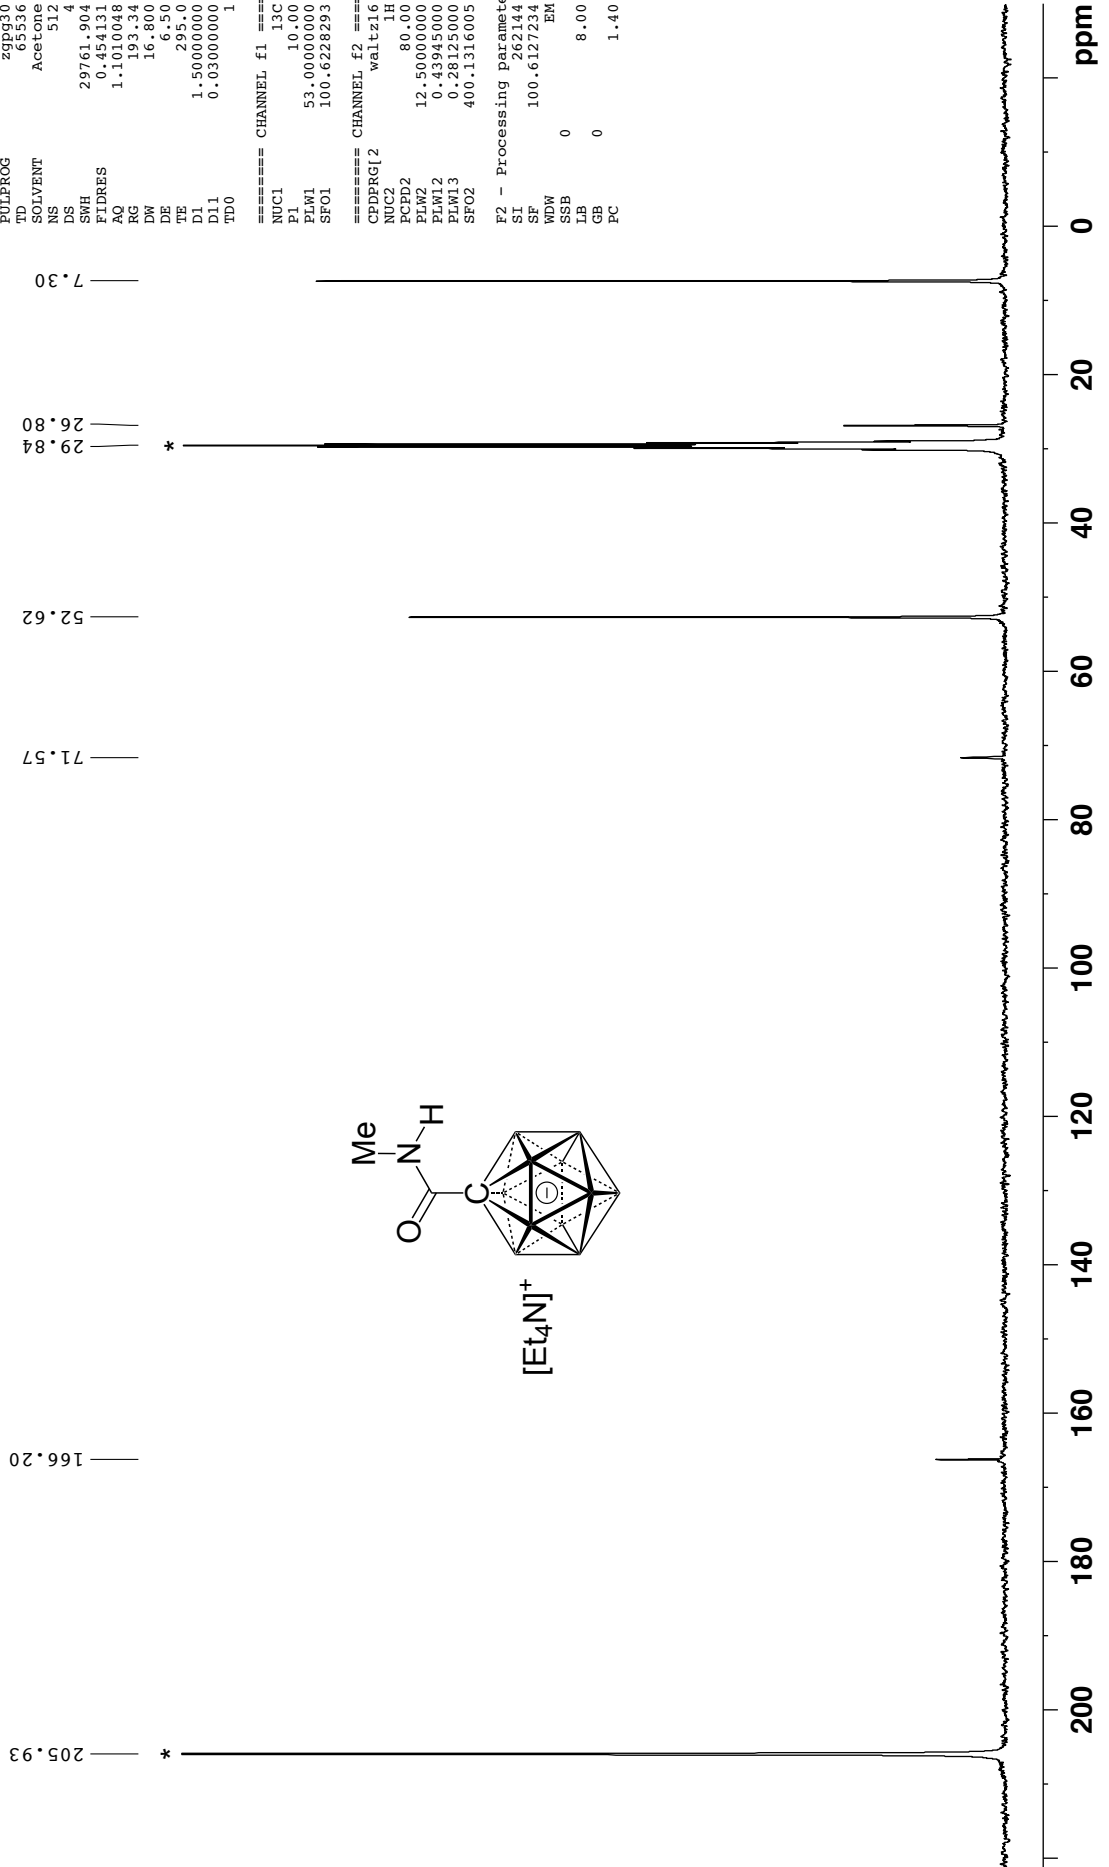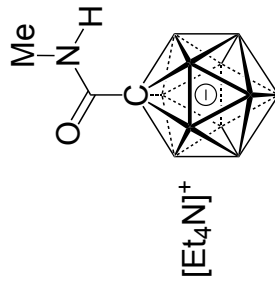



[Et4N][CB11H11-CONPropyl], Ca. 30mg in acetone-d6\*  
 11H{11B}, 400 MHz, T=22 C

Current Data Parameters  
 NAME 20180129-zhk-propyl  
 EXPNO 2  
 PROCNO 1

F2 - Acquisition Parameters  
 Date\_ 20180131  
 Time\_ 22.35  
 INSTRUM spect  
 PROBHD 5 mm PABBO BB/  
 PULPROG zgpg30  
 TD 16384  
 SOLVENT Acetone  
 NS 16  
 DS 4  
 SWH 8012.820 Hz  
 FIDRES 0.489064 Hz  
 AQ 1.0223616 sec  
 RG 64.43  
 DM 62.400 usec  
 DE 6.50 usec  
 TE 294.6 K  
 D1 1.00000000 sec  
 D11 0.03000000 sec  
 TDO 1

==== CHANNEL f1 =====  
 NUC1 1H  
 P1 15.00 usec  
 PL1 12.50000000 W  
 SFO1 400.1320007 MHz  
 ===== CHANNEL f2 =====  
 CPDPRG[2] garp4  
 NUC2 11B  
 PCPD2 90.10 usec  
 PLM2 52.96589960 W  
 PLM1 0.6477898 W  
 SFO2 128.3776050 MHz  
 F2 - Processing parameters  
 SI 32768  
 SF 400.1300073 MHz  
 ADW 0  
 SSB 0  
 LB 1.00 Hz  
 GB 0  
 FC 1.40

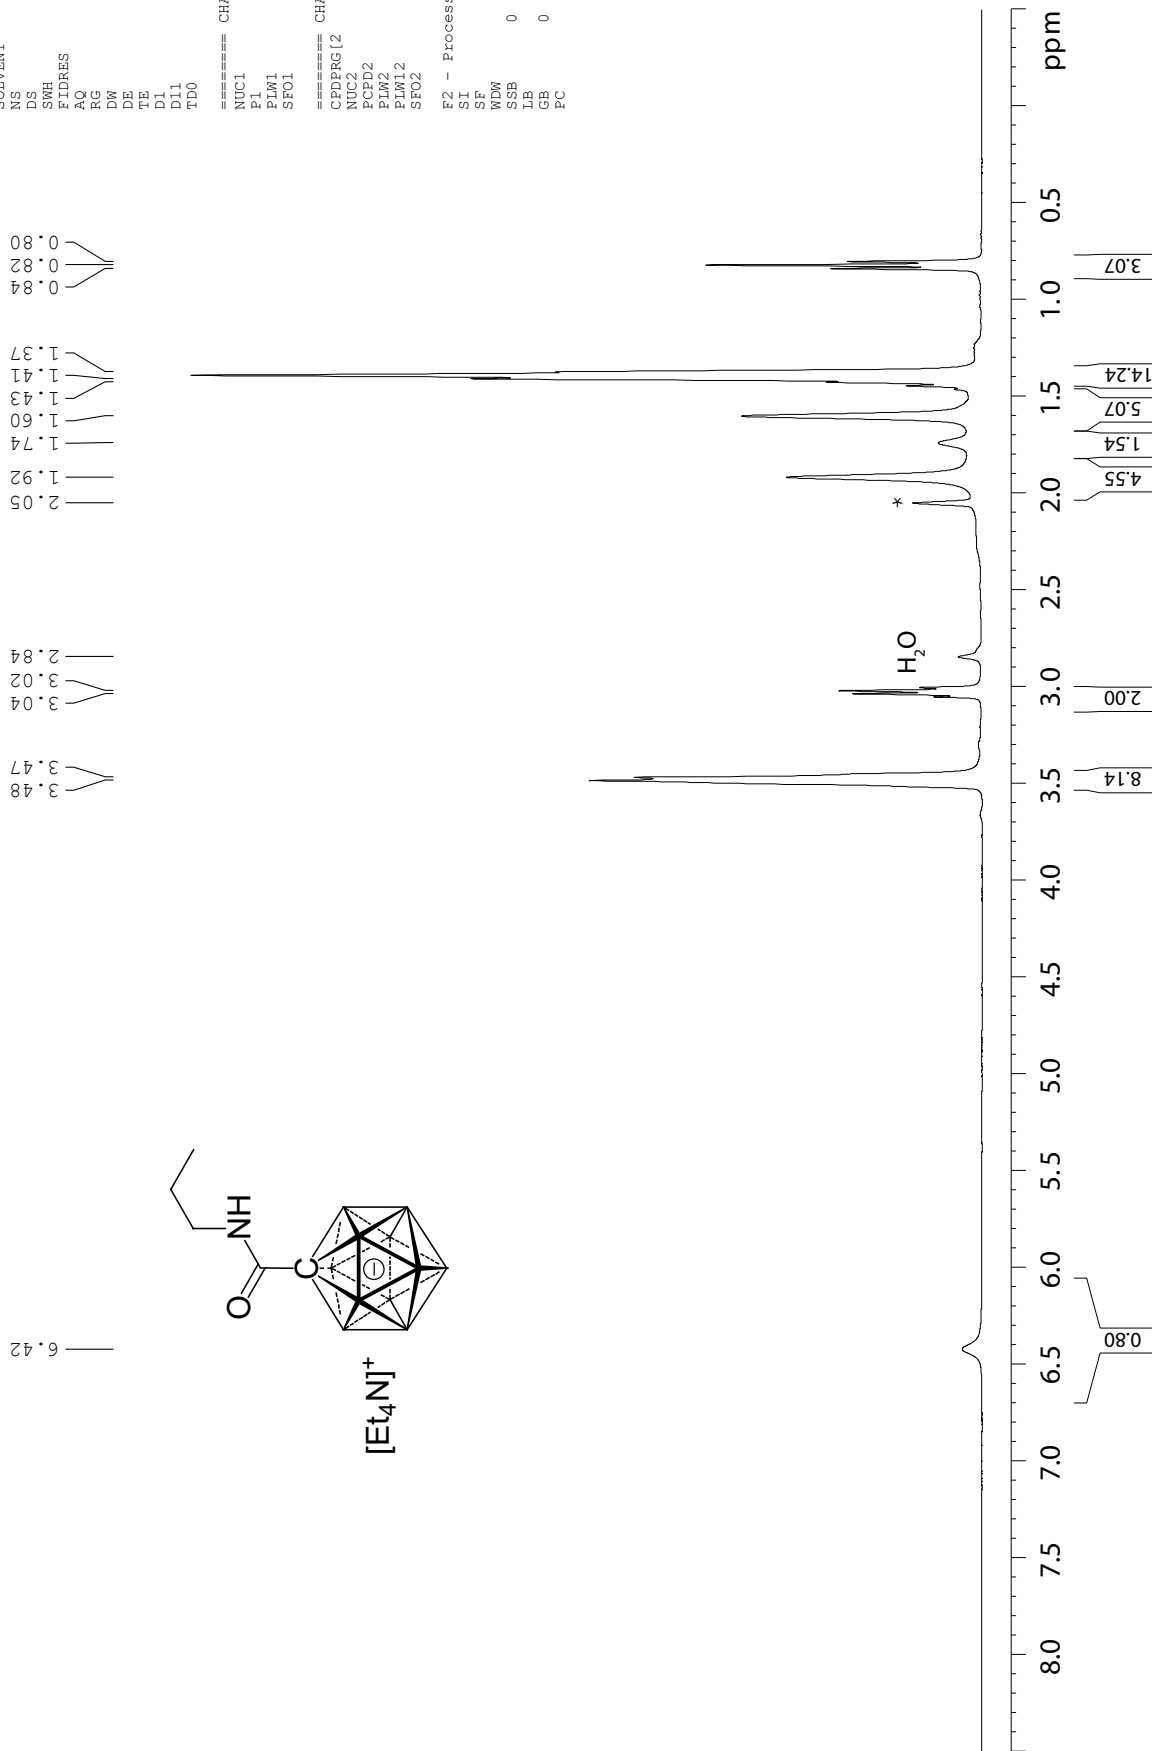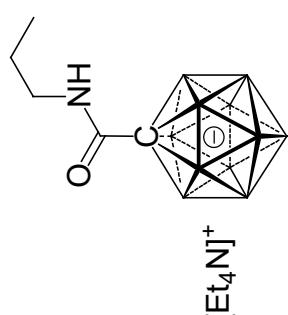

**[Et4N][CB11H11-CONPropyl], Ca. 30mg in acetone-d6  
11B, 128 MHz, T= 22 C**

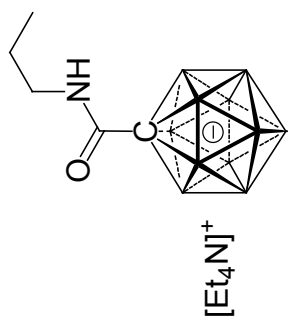

Current Data Parameters  
 NAME 20180129-zhk-propyl  
 EXPNO 3  
 PROCNO 1

F2 - Acquisition Parameters  
 Date\_ 20180131  
 Time 22.41  
 INSTRUM spect  
 PROBHD 5 mm PABBO BB/  
 PULPROG zg  
 TD 65536  
 SOLVENT Acetone  
 NS 128  
 DS 4  
 SMH 25510.203 Hz  
 FIDRES 0.389255 Hz  
 AQ 1.2845056 sec  
 RG 193.34  
 DW 19.600 usec  
 DE 6.50 usec  
 TE 293.9 K  
 D1 1.00000000 sec  
 TD0 1

==== CHANNEL f1 =====  
 NUC1 11B  
 P1 9.93 usec  
 PL1 52.9659960 W  
 SFO1 128.3776052 MHz

F2 - Processing parameters  
 SF 128.3776050 MHz  
 SFO 128.3776050 MHz  
 NDM 0  
 SSB 0  
 LB 1.00 Hz  
 GB 0  
 PC 1.40

12.61  
13.68  
14.87  
6.56  
7.62

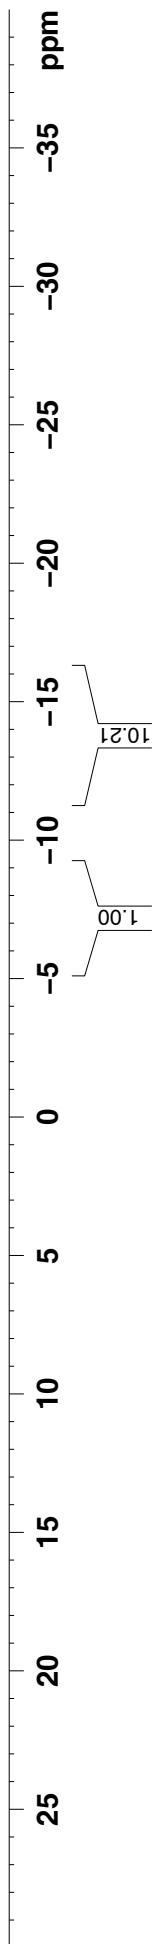

**[Et<sub>4</sub>N][CB11H<sub>11</sub>-CONPropyl], Ca. 30mg in acetone-d<sub>6</sub>  
11B{1H}, 128 MHz, T = 22 C**

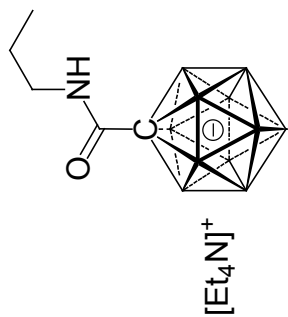

```

Current Data Parameters
NAME      20180129-zhk-propyl
EXPNO     4
PROCNO    1

F2 - Acquisition Parameters
Date_     20180131
Time      22.47
INSTRUM   spect
PROBHD    5 mm PABBO BB/
PULPROG   zgpg30
TD         65536
SOLVENT   Acetone
NS         128
DS         4
SMH        25510.203 Hz
FIDRES     0.389255 Hz
AQ         1.2845056 sec
RG         193.34
DM         19.600 usec
DE         6.50 usec
TE         294.6 K
D1         1.00000000 sec
D1.1      0.03000000 sec
TD0        1
  
```

```

===== CHANNEL f1 =====
NUC1      11B
P1         9.93 usec
PL1       52.96599960 W
SFO1      128.3776050 MHz

===== CHANNEL f2 =====
CPDPRG2   waltz16
NUC2      1H
PCPD2     80.00 usec
PLM2      12.50000000 W
PLM1      0.23945000 W
PLM3      0.28125000 W
SFO2      400.1320007 MHz
  
```

```

F2 - Processing parameters
SI         32768
SF         128.3776050 MHz
WDW        EM
SSB        0
LB         1.00 Hz
GB         0
PC         1.40
  
```

— 14.27  
— 13.14  
— 7.09

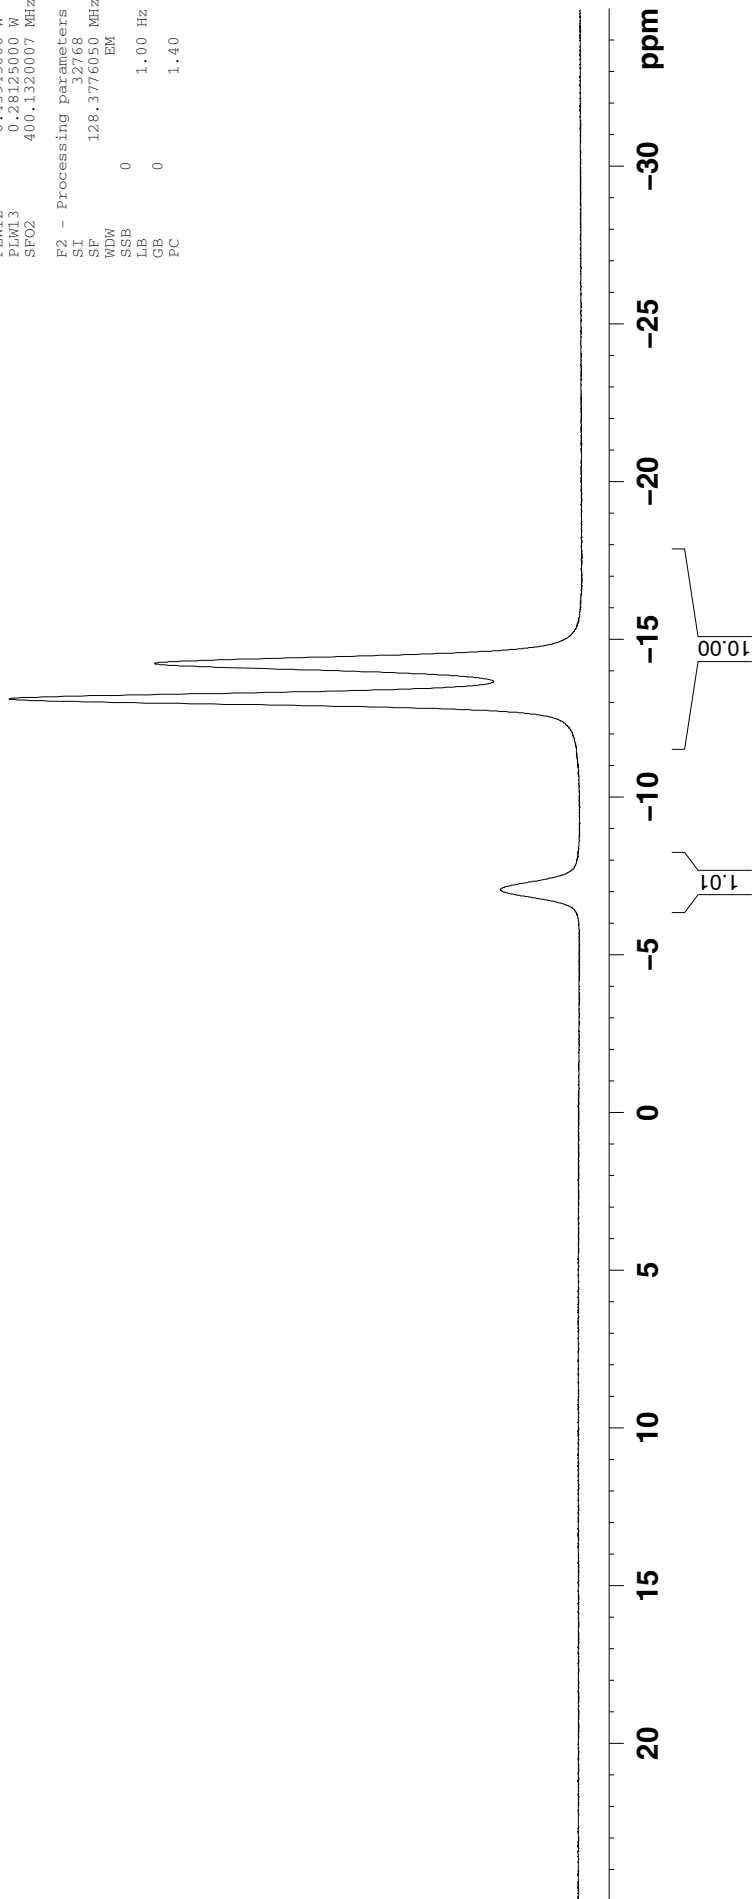

**[Et4N][CB11H11-CONPropyl], Ca. 30mg in acetone-d6  
13C{1H}, 100 MHz, T = 22 C**

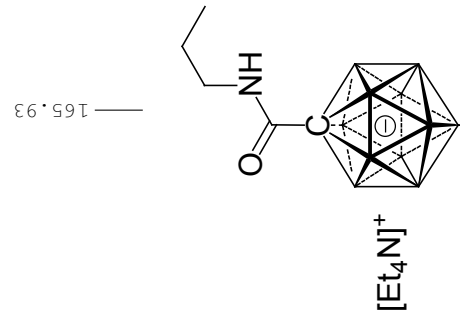

Current Data Parameters  
 NAME 20180129-zhk-propyl  
 EXPNO 5  
 PROCNO 1  
 F2 - Acquisition Parameters  
 Date\_ 20180131  
 Time 23.34  
 INSTRUM spect  
 PROBHD 5 mm PABBO BB/  
 PULPROG zgpg30  
 TD 65536  
 SOLVENT Acetone  
 NS 1024  
 DS 4  
 SMH 29761.904 Hz  
 FIDRES 0.454131 Hz  
 AQ 1.1010048 sec  
 RG 193.34  
 DW 16.800 usec  
 DE 6.50 usec  
 TE 295.1 K  
 D1 1.50000000 sec  
 D11 0.03000000 sec  
 TDO 1

==== CHANNEL f1 =====  
 NUC1 13C  
 P1 10.00 usec  
 PLW1 53.00000000 W  
 SFO1 100.6228293 MHz  
 ===== CHANNEL f2 =====  
 CPDPRG[2] waltz16  
 NUC2 1H  
 ECPD2 80.00 usec  
 PLW2 12.50000000 W  
 PLW12 0.43945000 W  
 PLW13 0.28125000 W  
 SFO2 400.1316005 MHz  
 F2 - Processing Parameters  
 SI 32768  
 SF 100.6126846 MHz  
 VDW EM  
 SSB 0  
 LB 3.00 Hz  
 GB 0  
 FC 1.40

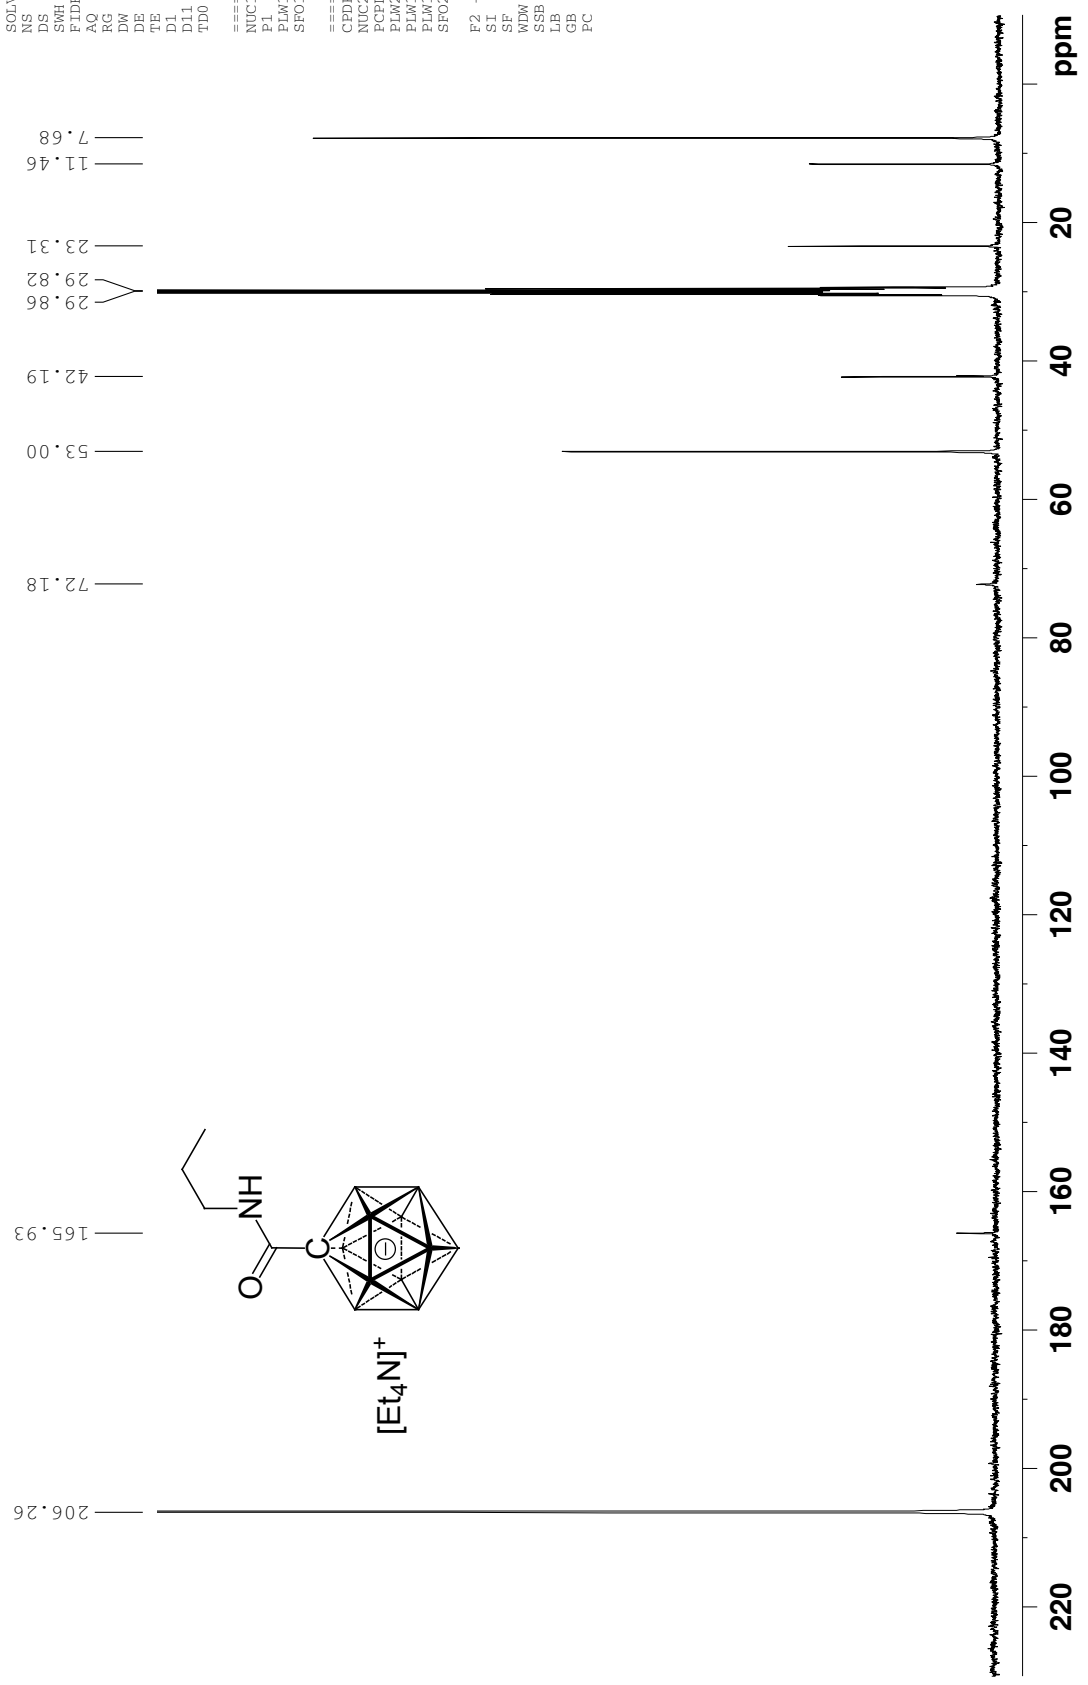

[Et<sub>4</sub>N][CB11H11-CONHC7H15], Ca. 30mg in acetone-d<sub>6</sub> \*  
<sup>1</sup>H{<sup>11</sup>B}, 400 MHz, T = 22 °C

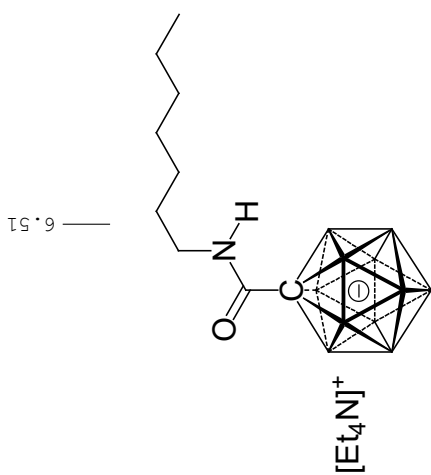

Current Data Parameters  
 NAME 21080106-zbk-C7H15NH2  
 EXPNO 1  
 PROCNO 1

F2 - Acquisition Parameters  
 Date\_ 20180107  
 Time\_ 15.48  
 INSTRUM spect  
 PROBHD 5 mm PABBO BB/  
 PULPROG zgpg30  
 TD 16384  
 SOLVENT Acetone  
 NS 16  
 DS 4  
 SWH 8012.820 Hz  
 FIDRES 0.489064 Hz  
 AQ 1.0223616 sec  
 RG 24.52  
 DW 62.400 usec  
 DE 6.50 usec  
 TE 294.4 K  
 D1 1.00000000 sec  
 D11 0.03000000 sec  
 TDO 1

==== CHANNEL f1 =====  
 NUC1 <sup>1</sup>H  
 P1 15.00 usec  
 PLW1 12.50000000 W  
 SFO1 400.1320007 MHz

==== CHANNEL f2 =====  
 CPDPRG2 garr4  
 NUC2 <sup>11</sup>B  
 P2 90.00 usec  
 PLW2 52.96599960 W  
 PL12 6.00377998 W  
 SFO2 128.3776050 MHz

F2 - Processing parameters  
 SI 32768  
 SF 400.1300074 MHz  
 WDM 0 EM  
 LB 0  
 GB 0  
 FC 1.40

2.05  
1.90  
1.73  
1.59  
1.40  
1.39  
1.38  
1.38  
1.38  
1.37  
1.36  
1.36  
1.26  
1.14  
0.88  
0.86  
0.85

3.49  
3.47  
3.46  
3.44  
3.10  
3.08  
3.07  
3.05

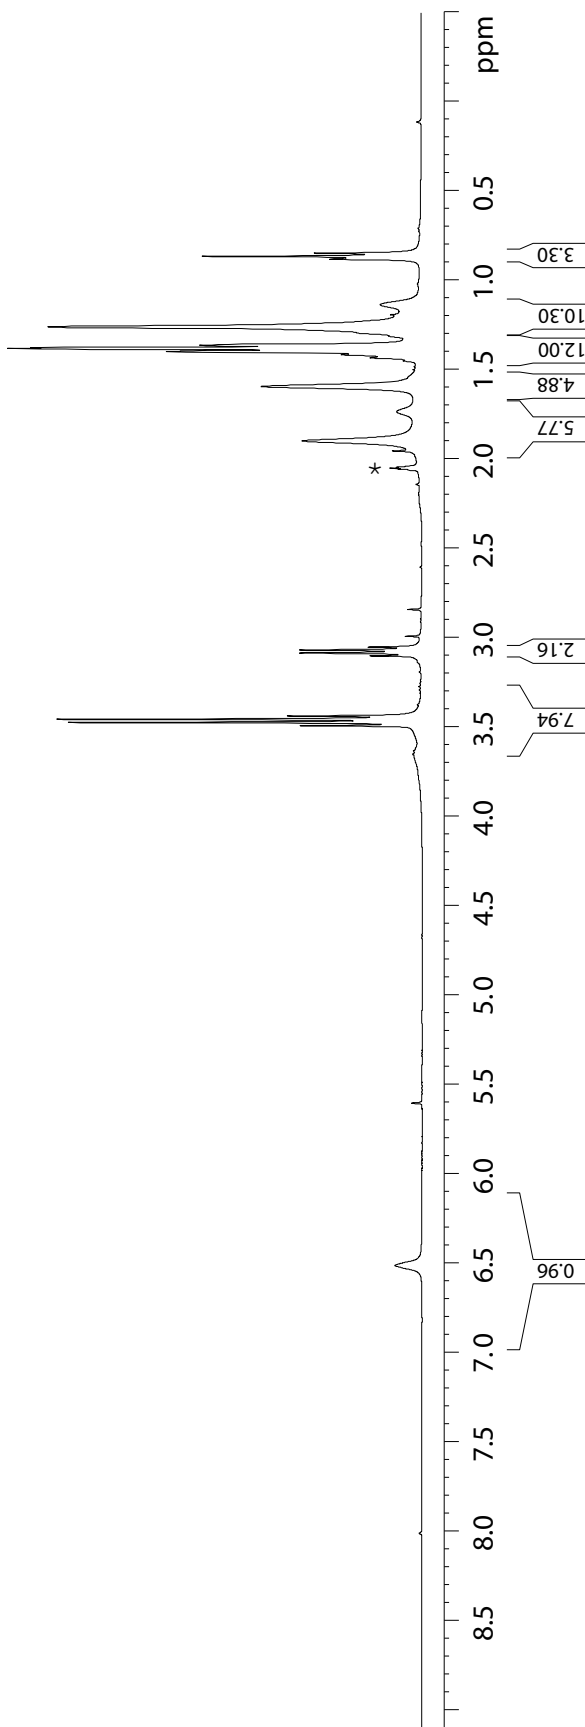

**[Et<sub>4</sub>N][CB11H<sub>11</sub>-CONHC<sub>7</sub>H<sub>15</sub>], Ca. 30mg in acetone-d<sub>6</sub>  
11B, 128 MHz, T= 22 C**

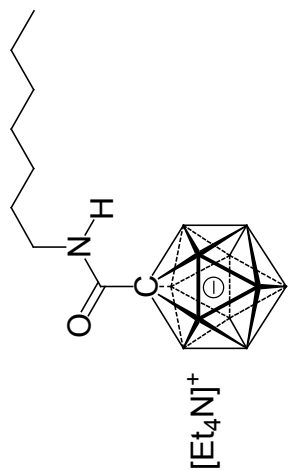

Current Data Parameters  
 NAME 21080106-zhk-C7H15NH2  
 EXPNO 3  
 PROCNO 1

F2 - Acquisition Parameters  
 Date\_ 20180107  
 Time 16.00  
 INSTRUM spect  
 PROBHD 5 mm PABBO BB/  
 PULPROG zg  
 TD 65536  
 SOLVENT Acetone  
 NS 128  
 DS 4  
 SWH 25510.203 Hz  
 FIDRES 0.389255 Hz  
 AQ 1.2845056 sec  
 RG 193.34  
 DW 19.600 usec  
 DE 6.50 usec  
 TE 293.8 K  
 D1 1.00000000 sec  
 TD0 1

==== CHANNEL f1 =====  
 NUC1 11B  
 P1 9.93 usec  
 PLW1 52.9659960 W  
 SFO1 128.3776052 MHz  
 F2 - Processing parameters  
 SI 32768  
 SF 128.3776050 MHz  
 MDW EM  
 SSB 0  
 LB 0  
 GB 0  
 FC 1.40

— 14.88  
 — 13.67  
 — 12.58  
 — 7.50  
 — 6.47

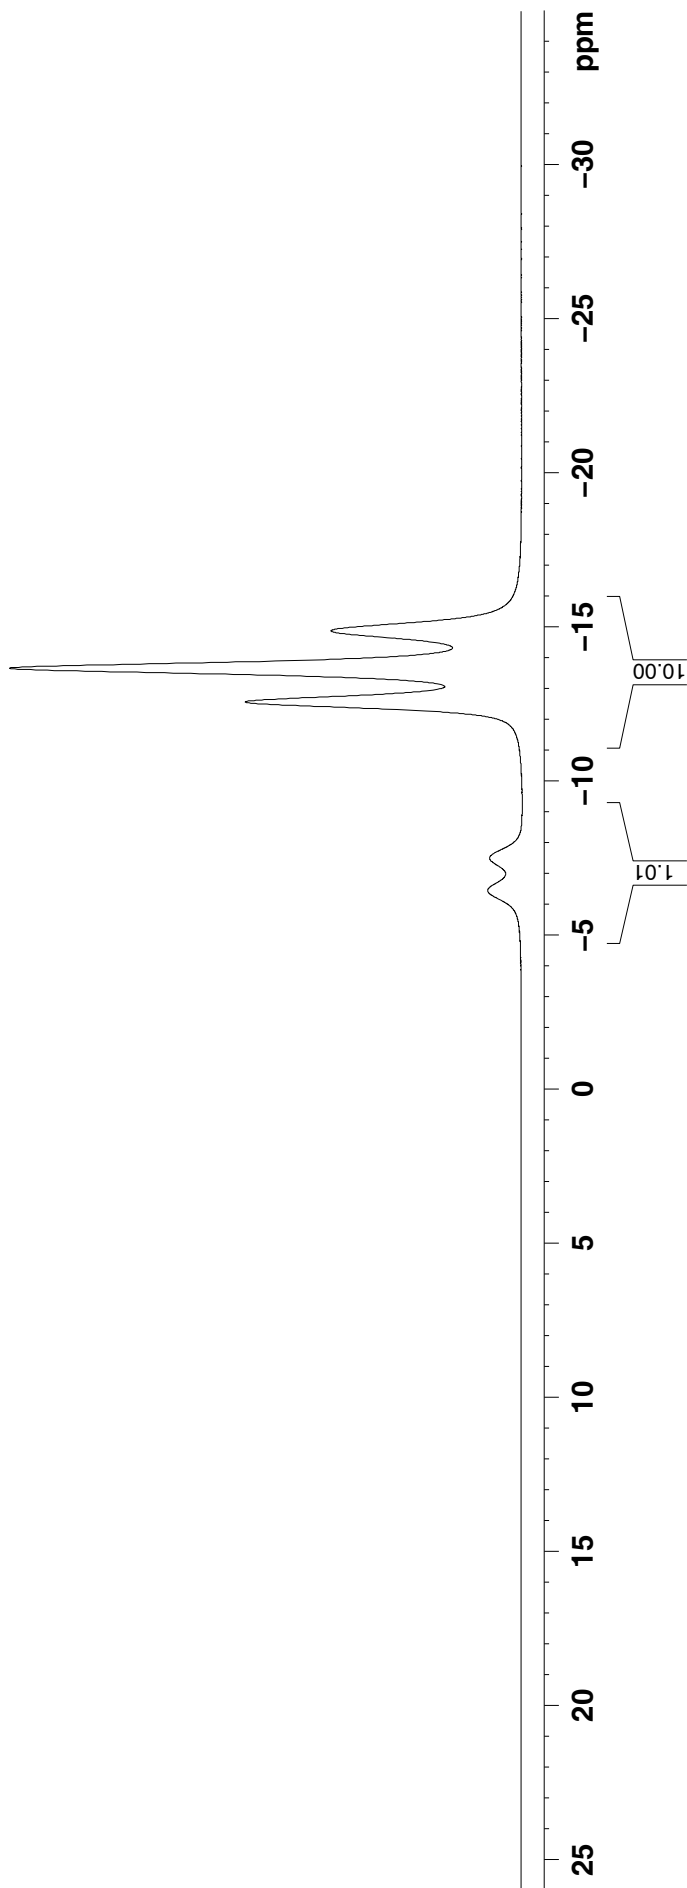

**[Et<sub>4</sub>N][CB11H<sub>11</sub>-CONHC<sub>7</sub>H<sub>15</sub>], Ca. 30mg in acetone-d<sub>6</sub>  
11B{1H}, 128 MHz, T= 22 C**

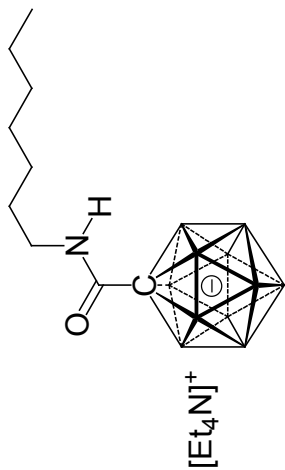

Current Data Parameters  
 NAME 21080106-zhk-C7H15NH2  
 EXPNO 2  
 PROCNO 1

F2 - Acquisition Parameters  
 Date\_ 20180107  
 Time 15.54  
 INSTRUM spect  
 PROBHD 5 mm PARBO BB/  
 PULPROG zgpg30  
 TD 65536  
 SOLVENT Acetone  
 NS 128  
 DS 4  
 SWH 25510.203 Hz  
 FIDRES 0.389255 Hz  
 AQ 1.2845056 sec  
 RG 193.34  
 DW 19.600 usec  
 DE 6.50 usec  
 TE 294.7 K  
 D1 1.00000000 sec  
 D11 0.03000000 sec  
 TD0 1

==== CHANNEL f1 =====  
 NUC1 11B  
 P1 9.93 usec  
 PLW1 52.9659960 W  
 SFO1 128.3776050 MHz

==== CHANNEL f2 =====  
 CPDPRG12 waltz16  
 NUC2 1H  
 P2 80.00 usec  
 PLW2 12.50000000 W  
 PLM2 0.43945000 W  
 PLM12 0.28135000 W  
 PLM13 0.28135000 W  
 SFO2 400.1320007 MHz

F2 - Processing parameters  
 SI 32768  
 SF 128.3776050 MHz  
 EQ  
 WDM 0  
 SSB 0  
 LB 1.00 Hz  
 GB 0  
 FC 1.40

— -7.01  
 — -13.11  
 — -14.29

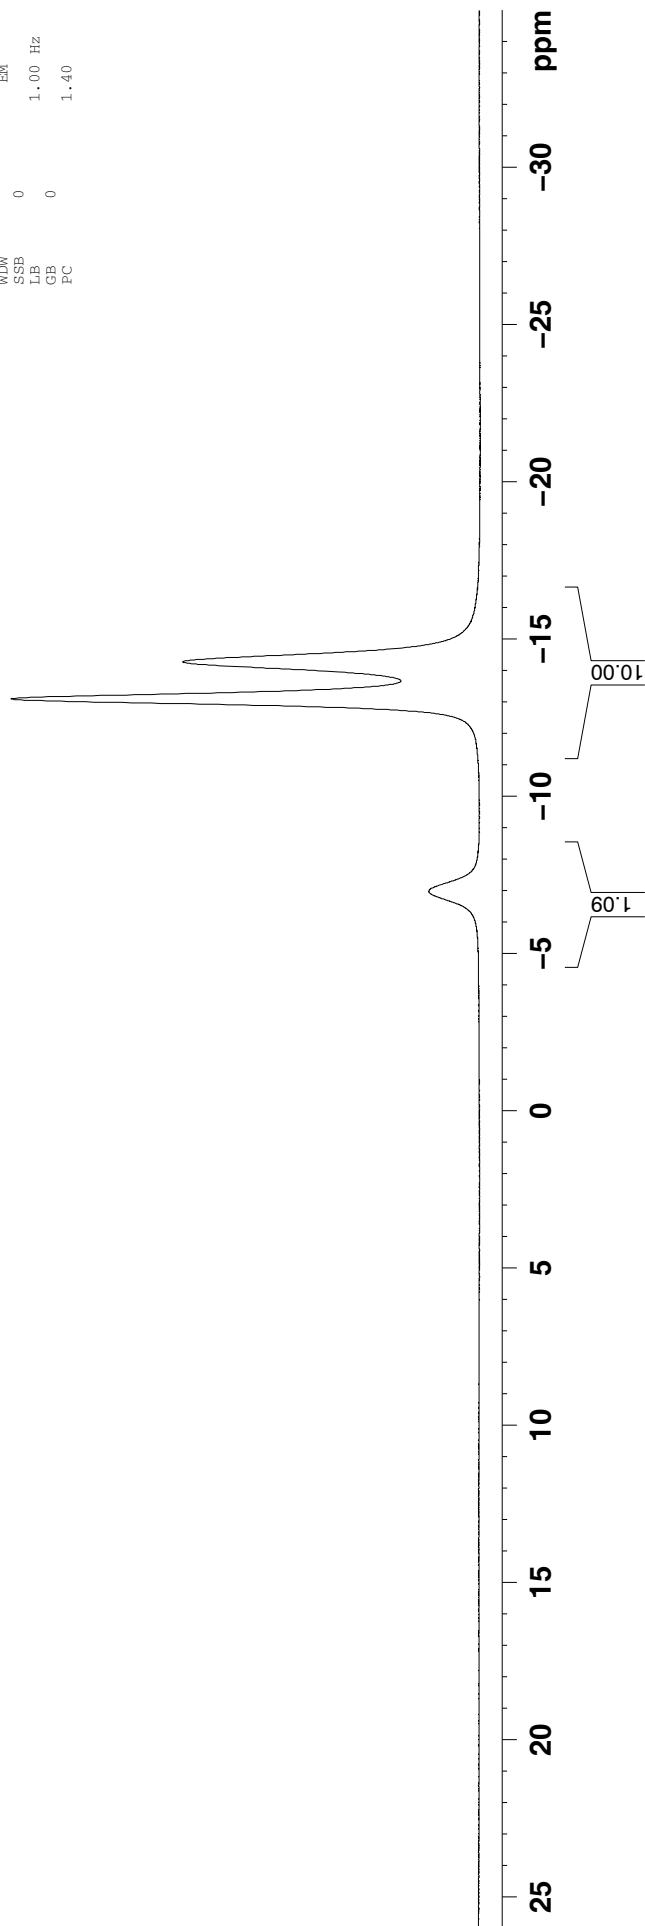

[Et4N][CB11H11-CONHC7H15], Ca. 30mg in acetone-d6\*  
<sup>13</sup>C{1H}, 100 MHz, T= 22 C

Current Data Parameters  
 NAME 21080106-zhk-C7H15NH2  
 EXPNO 4  
 PROCNO 1

F2 - Acquisition Parameters  
 Date\_ 20180107  
 Time 16.47  
 INSTRUM spect  
 PROBHD 5 mm PABBO BB/  
 PULPROG zgpg30  
 TD 65536  
 SOLVENT Acetone  
 NS 1024  
 DS 4  
 SWH 29761.904 Hz  
 FIDRES 0.454131 Hz  
 AQ 1.1010048 sec  
 RG 193.34  
 DW 16.800 usec  
 DE 6.50 usec  
 TE 294.6 K  
 D1 1.50000000 sec  
 D11 0.03000000 sec  
 TD0 1

==== CHANNEL f1 =====  
 NUC1 <sup>13</sup>C  
 P1 10.00 usec  
 PLW1 53.00000000 W  
 SFO1 100.6228293 MHz

==== CHANNEL f2 =====  
 CPDPRG[2] waltz16  
 NUC2 <sup>1</sup>H  
 PCPD2 80.00 usec  
 PLW2 12.50000000 W  
 PLW12 0.43945000 W  
 PLW13 0.28125000 W  
 SFO2 400.1316005 MHz

F2 - Processing parameters  
 SI 32768  
 SF 100.6126925 MHz  
 WDW EM  
 SSB 0  
 LB 0  
 GB 0  
 PC 1.40

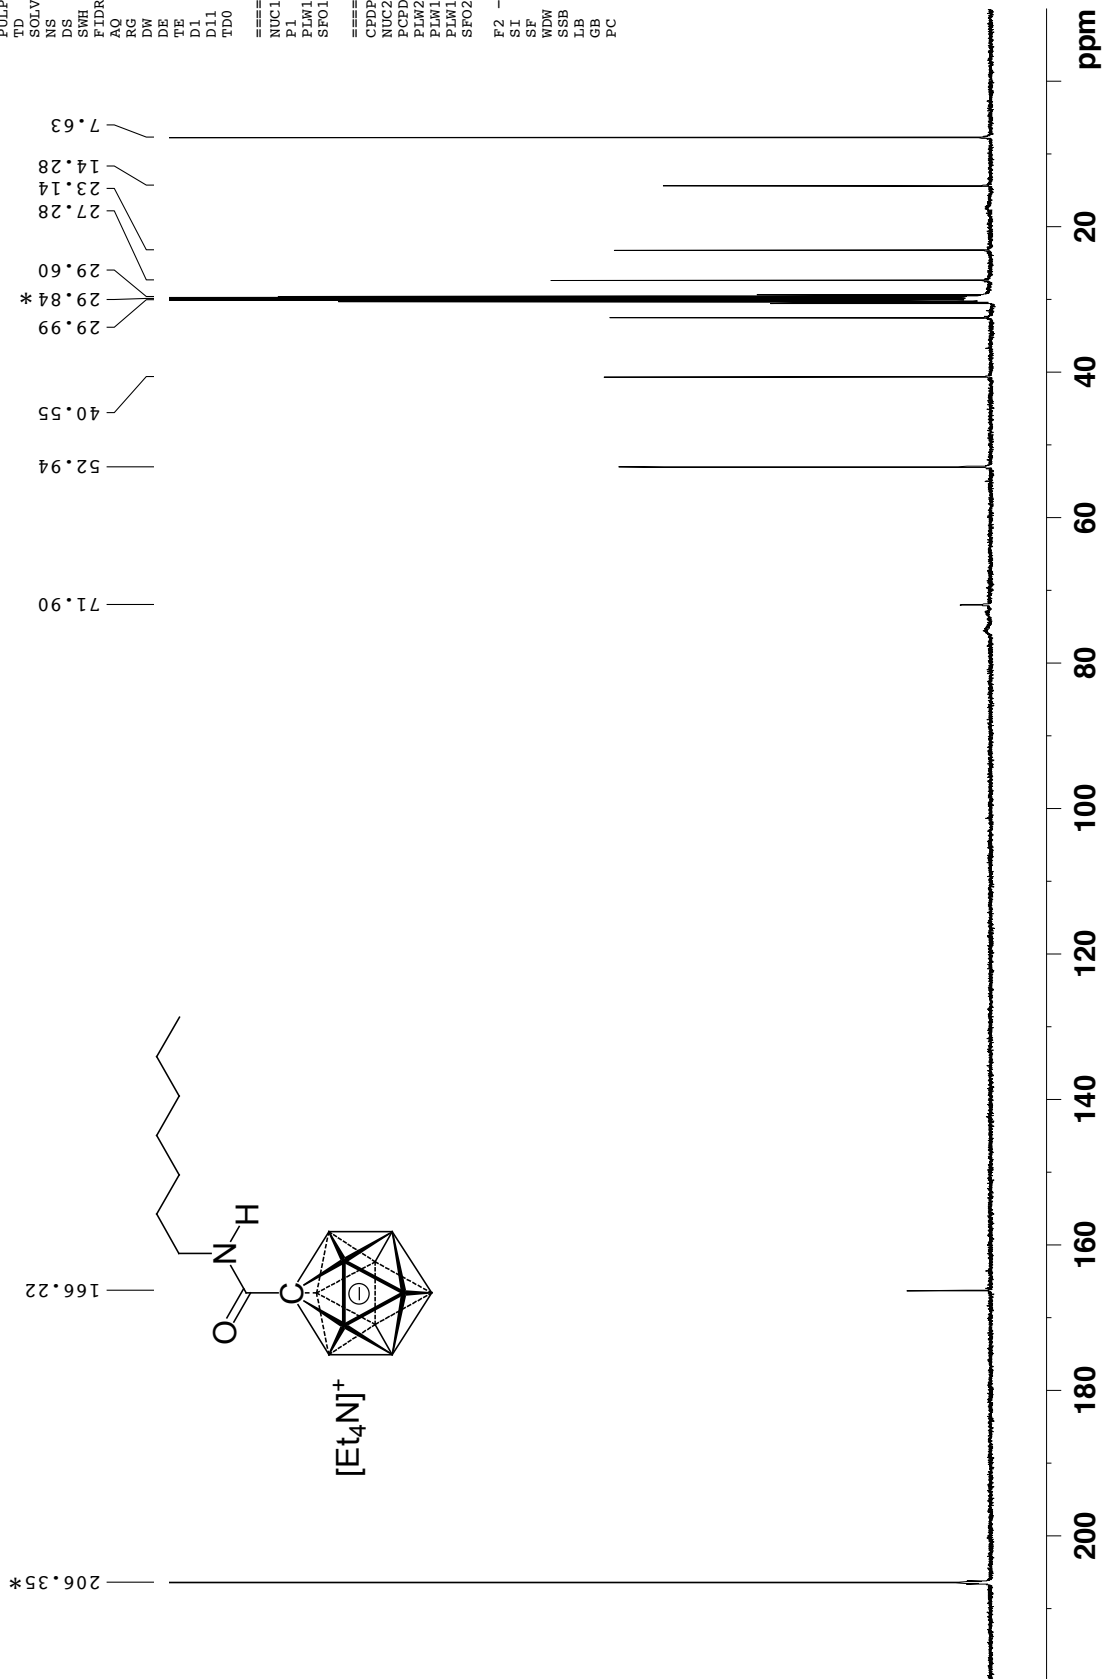



[Et4N][CB11H11-CONHPh], Ca. 20mg in acetone-d6 \*  
<sup>1</sup>H{<sup>1</sup>H}, 400 MHz, T=22 °C

7.31  
7.27  
7.27  
7.22  
7.20  
7.18  
7.00

4.32  
4.30

3.47  
3.45  
3.43  
3.41

2.85

2.05  
1.98  
1.77  
1.63  
1.38  
1.36  
1.37  
1.36  
1.35  
1.34  
1.34  
1.34

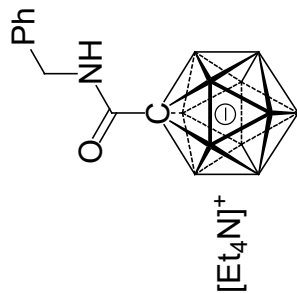

Current Data Parameters  
 NAME 20180119-zhk-benzyl  
 EXPNO 2  
 PROCNO 1

F2 - Acquisition Parameters  
 Date\_ 20180120  
 Time\_ 14.59  
 INSTRUM spect  
 PROBHD 5 mm PABBO BB/  
 PULPROG zgpg30  
 TD 16384  
 SOLVENT Acetone  
 NS 16  
 DS 4  
 SWH 8012.820 Hz  
 FIDRES 0.489064 Hz  
 AQ 1.0223616 sec  
 RG 78.69  
 DW 62.400 usec  
 DE 6.50 usec  
 TE 294.9 K  
 D1 1.00000000 sec  
 D11 0.03000000 sec  
 TDO 1

==== CHANNEL f1 =====  
 NUC1 1H  
 P1 15.00 usec  
 PLW1 12.5000000 W  
 SF01 400.1320007 MHz

==== CHANNEL f2 =====  
 CPDPRG2 garp4  
 NUC2 11B  
 P2 90.00 usec  
 PLW2 52.96599960 W  
 PLW12 0.64477998 W  
 SF02 128.3776050 MHz

F2 - Processing parameters  
 SI 32768  
 SF 400.1300073 MHz  
 WDW EM  
 SSB 0  
 LB 1.00 Hz  
 GB 0  
 PC 1.40

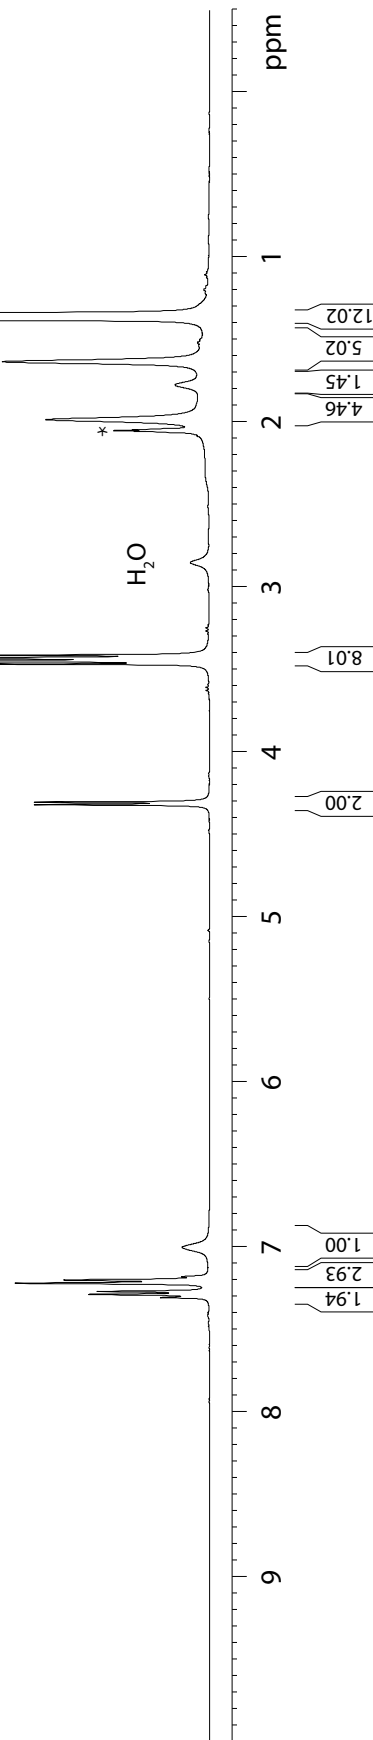

**[Et<sub>4</sub>N][CB11H<sub>11</sub>-CONHPh], Ca. 20mg in acetone-d<sub>6</sub>  
11B, 128 MHz, T = 22 C**

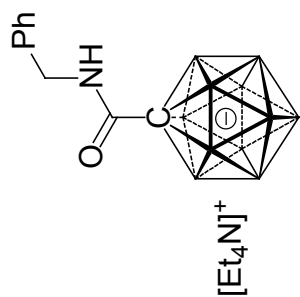

Current Data Parameters  
 NAME 20180119-zhk-benzyl  
 EXNO 3  
 PROCNO 1

F2 - Acquisition Parameters  
 Date\_ 20180120  
 Time 15.05  
 INSTRUM spect  
 PROHD 5 mm PABBO BB/  
 PULPROG zg  
 TD 65536  
 SOLVENT Acetone  
 NS 128  
 DS 4  
 SMH 25510.203 Hz  
 FIDRES 0.389255 Hz  
 AQ 1.2845056 sec  
 RG 193.34  
 DM 19.600 usec  
 DE 6.50 usec  
 TE 294.5 K  
 D1 1.00000000 sec  
 TD0 1

==== CHANNEL f1 =====  
 NUC1 11B  
 P1 9.93 usec  
 PL1 52.96599960 W  
 SF01 128.3776052 MHz

F2 - Processing Parameters  
 SI 32768  
 SF 128.3776050 MHz  
 WDW EM  
 SSB 0  
 LB 0  
 GB 0  
 PC 1.40

14.81  
13.61  
12.52  
7.43  
6.36

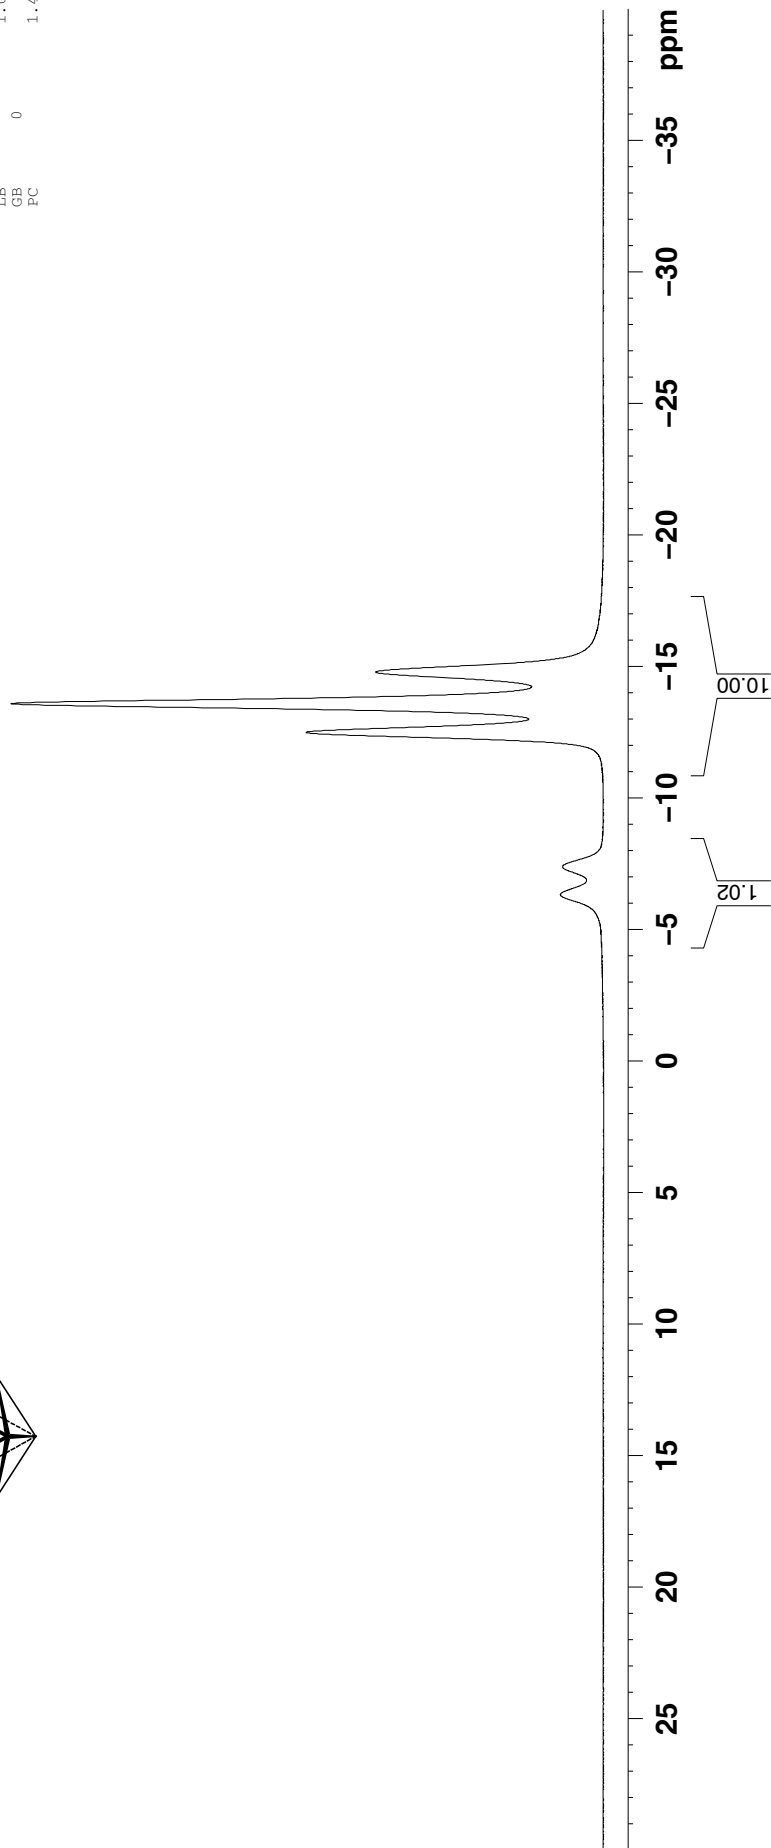

**[Et<sub>4</sub>N][CB11H<sub>11</sub>-CONHBn], Ca. 20mg in acetone-d<sub>6</sub>  
<sup>11</sup>B{<sup>1</sup>H}, 128 MHz, T = 22 C**

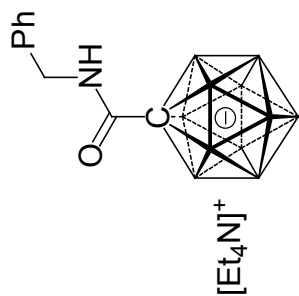

Current Data Parameters  
 NAME 20180119-zhk-benzyl  
 EXNO 4  
 PROCNO 1

F2 - Acquisition Parameters  
 Date\_ 20180120  
 Time 15.11  
 INSTRUM spect  
 PROHD 5 mm PABBO BB/  
 PULPROG zgpg30  
 TD 65536  
 SOLVENT Acetone  
 NS 128  
 DS 4  
 SMH 25510.203 Hz  
 FIDRES 0.389255 Hz  
 AQ 1.2845056 sec  
 RG 193.34  
 DM 19.600 usec  
 DE 6.50 usec  
 TE 295.3 K  
 D1 1.00000000 sec  
 D1.1 0.03000000 sec  
 TD0 1

==== CHANNEL f1 =====  
 NUC1 11B  
 P1 9.93 usec  
 PL1 52.9659960 W  
 SFO1 128.3776050 MHz

==== CHANNEL f2 =====  
 CPDPRG[2] waltz16  
 NUC2 1H  
 P2 80.00 usec  
 PL2 12.5000000 W  
 PL12 0.23945000 W  
 PLM2 0.28125000 W  
 PLM3 0.28125000 W  
 SFO2 400.1320007 MHz

F2 - Processing Parameters  
 SI 32768  
 SF 128.3776050 MHz  
 ADW EM  
 SSB 0  
 LB 1.00 Hz  
 GB 0  
 FC 1.40

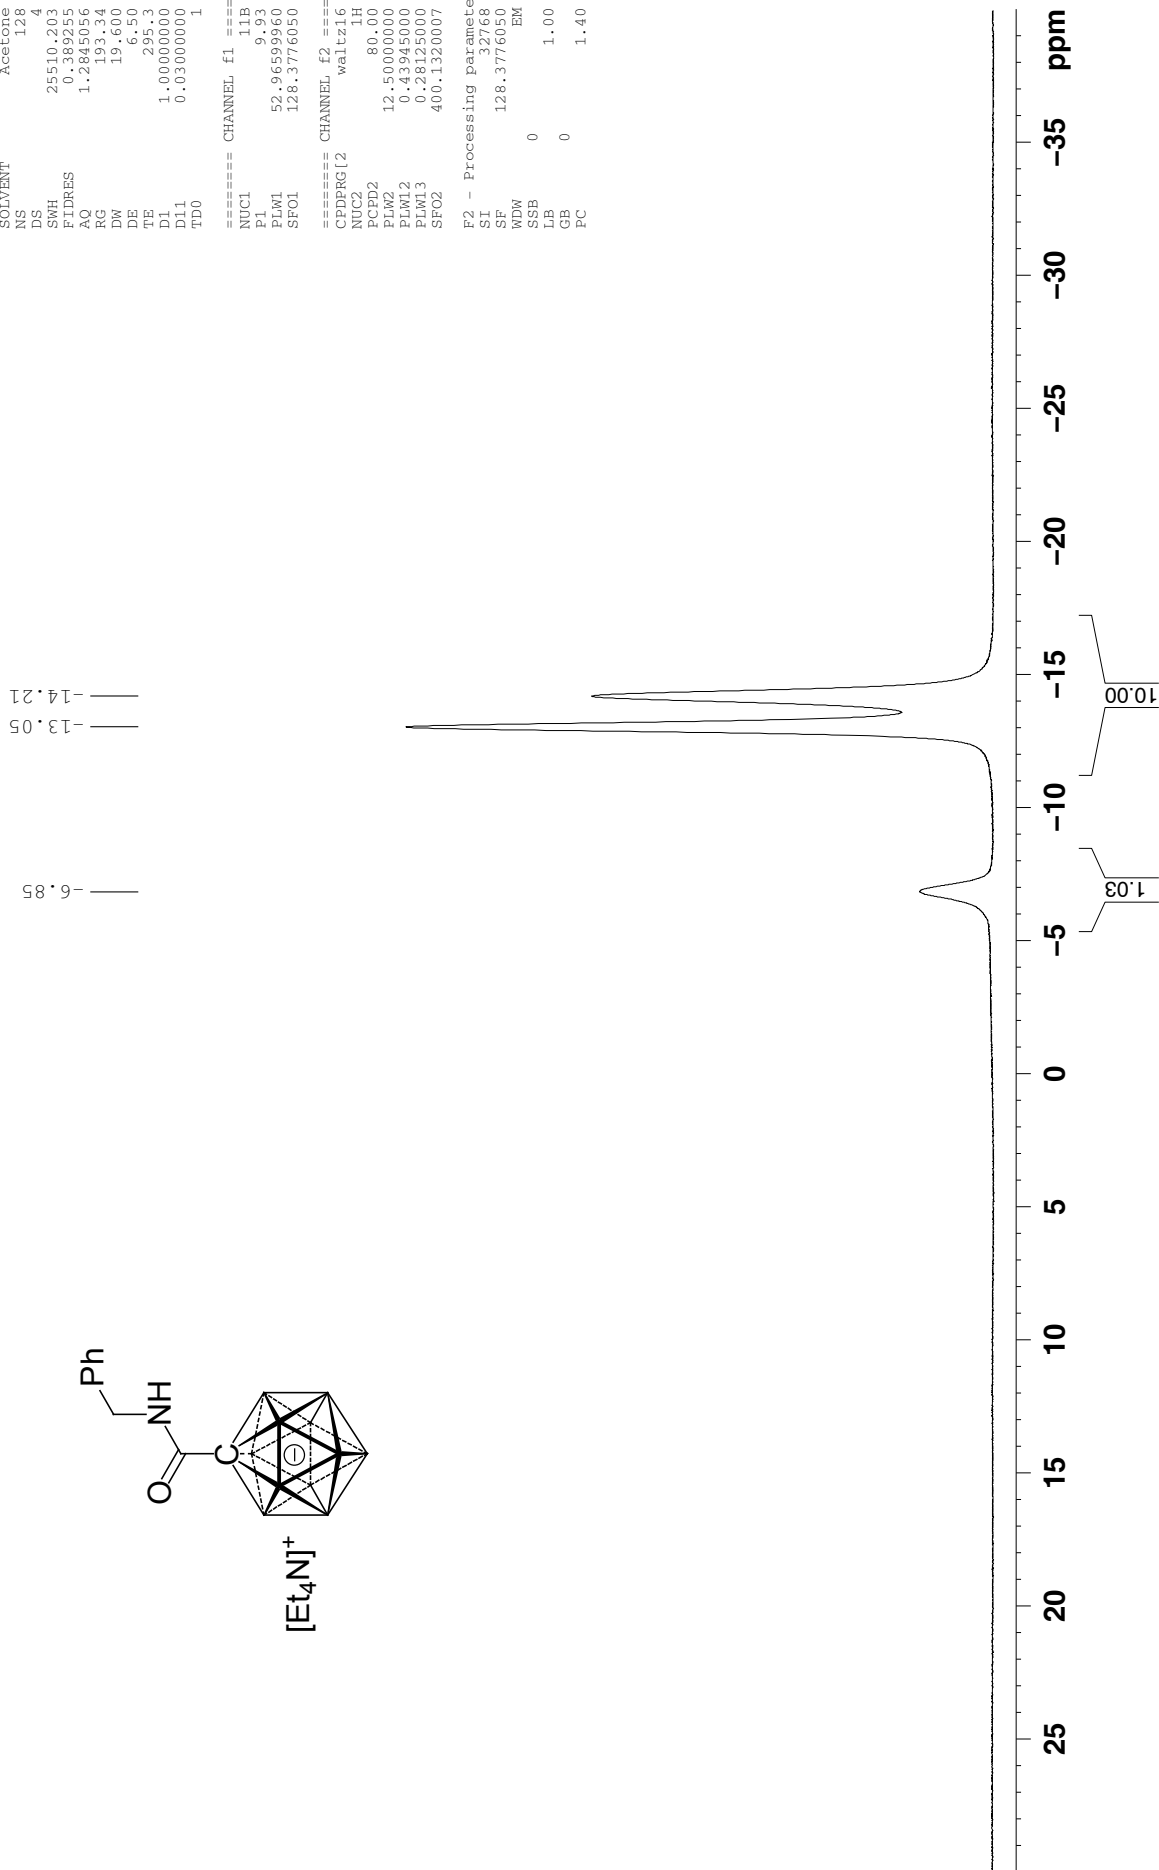

**[Et<sub>4</sub>N][CB11H<sub>11</sub>-CONHPh], Ca. 20mg in acetone-d<sub>6</sub>  
<sup>13</sup>C{<sup>1</sup>H}, 100 MHz, T = 22 C**

Current Data Parameters  
 NAME 20180119-zhk-benzyl  
 EXPNO 5  
 PROCNO 1

F2 - Acquisition Parameters  
 Date\_ 20180120  
 Time 15.35  
 INSTRUM spect  
 PROBHD 5 mm PABBO BB/  
 PULPROG zgpg30  
 TD 65536  
 SOLVENT Acetone  
 NS 512  
 DS 4  
 SMH 29761.904 Hz  
 FIDRES 0.454131 Hz  
 AQ 1.1010048 sec  
 RG 193.34  
 DW 16.800 usec  
 DE 6.50 usec  
 TE 295.4 K  
 D1 1.50000000 sec  
 D11 0.03000000 sec  
 TD0 1

==== CHANNEL f1 =====  
 NUC1 <sup>13</sup>C  
 P1 10.00 usec  
 PLW1 53.00000000 W  
 SFO1 100.6228293 MHz

==== CHANNEL f2 =====  
 CPDPRG2 waltz16  
 NUC2 <sup>1</sup>H  
 PCPD2 80.00 usec  
 PLW2 12.50000000 W  
 PLW12 0.43945000 W  
 PLW13 0.28125000 W  
 SFO2 400.1316005 MHz

F2 - Processing Parameters  
 SI 32768  
 SF 100.6126854 MHz  
 WDW EM  
 SSB 0  
 LB 4.00 Hz  
 GB 0  
 PC 1.40

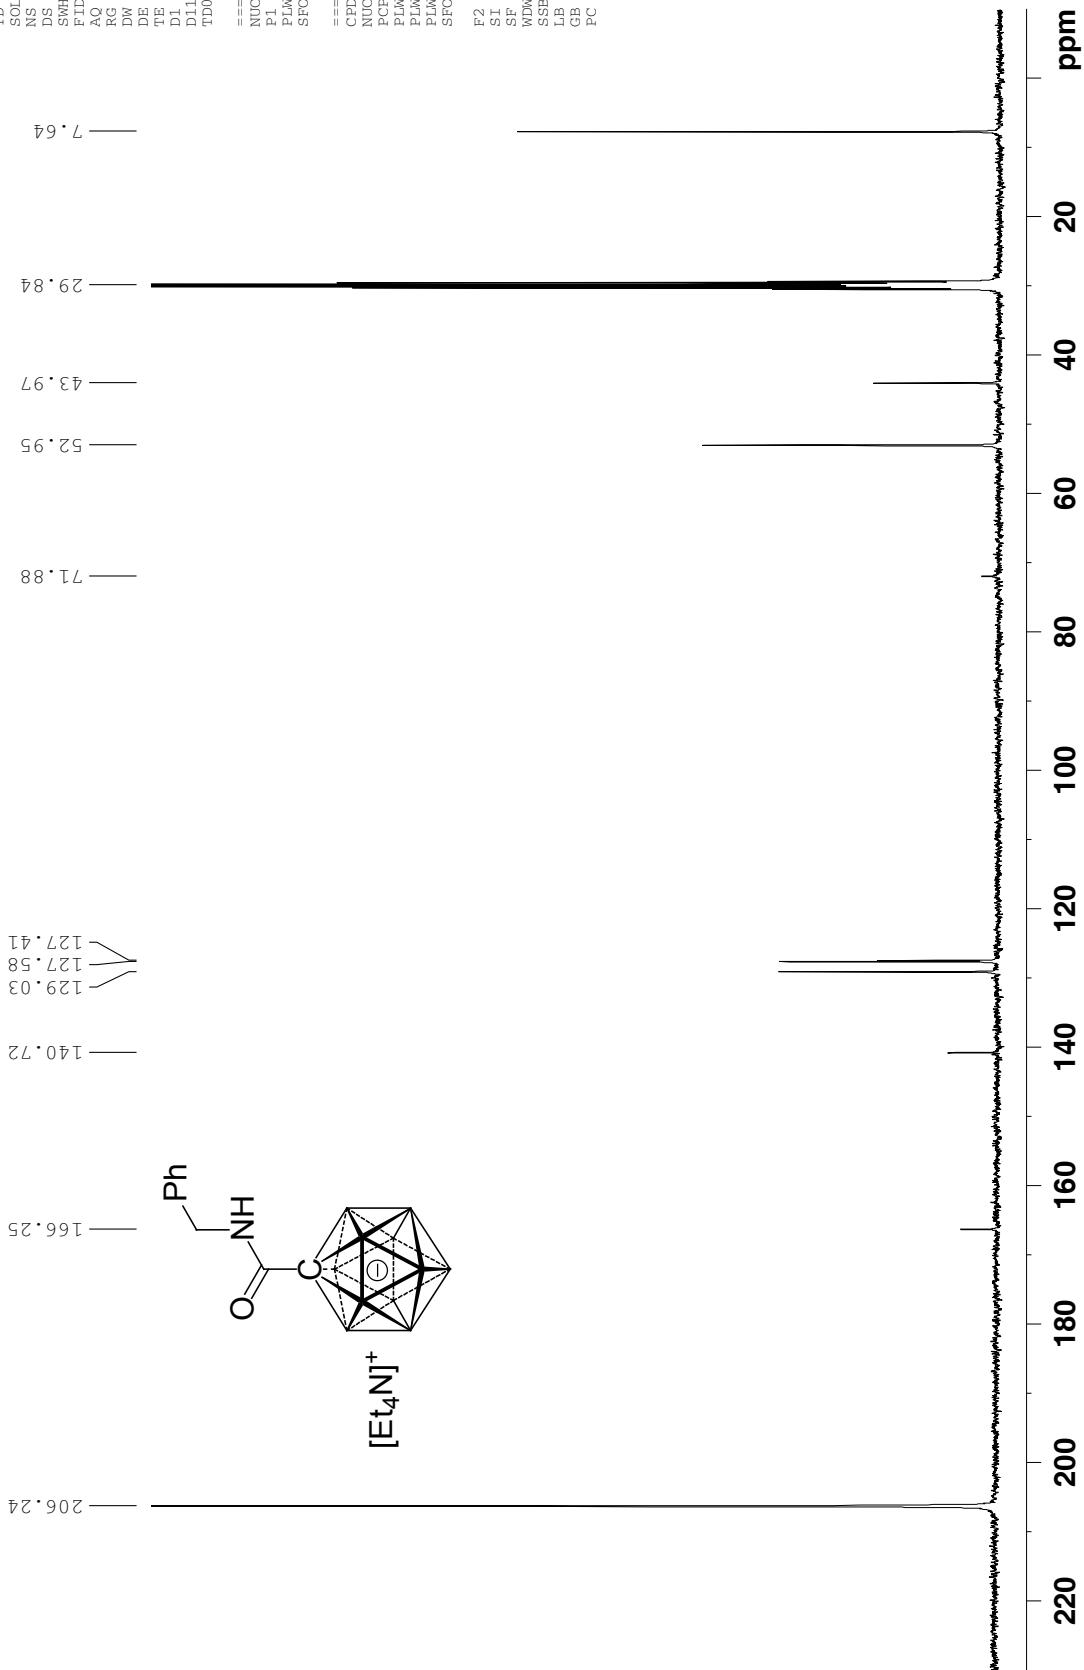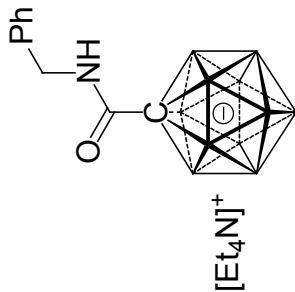

OMe amide, ca. 24 mg in CD3CN \*  
 1H{11B} NMR, 500 MHz, T = 22 C

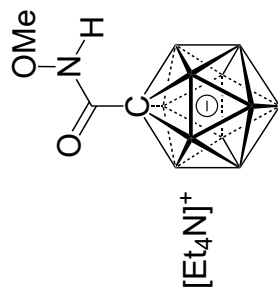

Current Data Parameters  
 NAME 20180203\_pyn\_ome\_amide\_201  
 EXPNO 2  
 PROCNO 1

F2 - Acquisition Parameters

Date\_ 20150127  
 Time\_ 17.56  
 INSTRUM spect  
 PROBHD 5 mm PABBO BB-  
 PULPROG zgpg30  
 TD 65836  
 SOLVENT CD3CN  
 NS 16  
 DS 0  
 SWH 14087.744 Hz  
 FIDRES 0.215115 Hz  
 AQ 2.3243434 sec  
 RG 50.8  
 DW 35.467 usec  
 DE 6.50 usec  
 TE 296.0 K  
 D1 5.0000000 sec  
 D11 0.0300000 sec

==== CHANNEL f1 =====  
 NUC1 1H  
 P1 12.00 usec  
 PLW1 19.0000000 W  
 SFO1 500.1310003 MHz

==== CHANNEL f2 =====  
 CPDPRG2 gspg  
 NUC2 11B  
 P2 60.00 usec  
 PLW2 75.0000000 W  
 PLW12 2.08350011 W  
 SFO2 160.4615690 MHz

F2 - Processing parameters  
 SI 65536  
 SF 500.1300156 MHz  
 WDW 0  
 SSB 0 Hz  
 LB 0  
 GB 0  
 PC 1.00

1.19  
1.19  
1.20  
1.21  
1.21  
1.21  
1.21  
1.22  
1.22  
1.22  
1.23  
1.52  
1.52  
1.81

3.05  
3.05  
3.14  
3.15  
3.17  
3.18

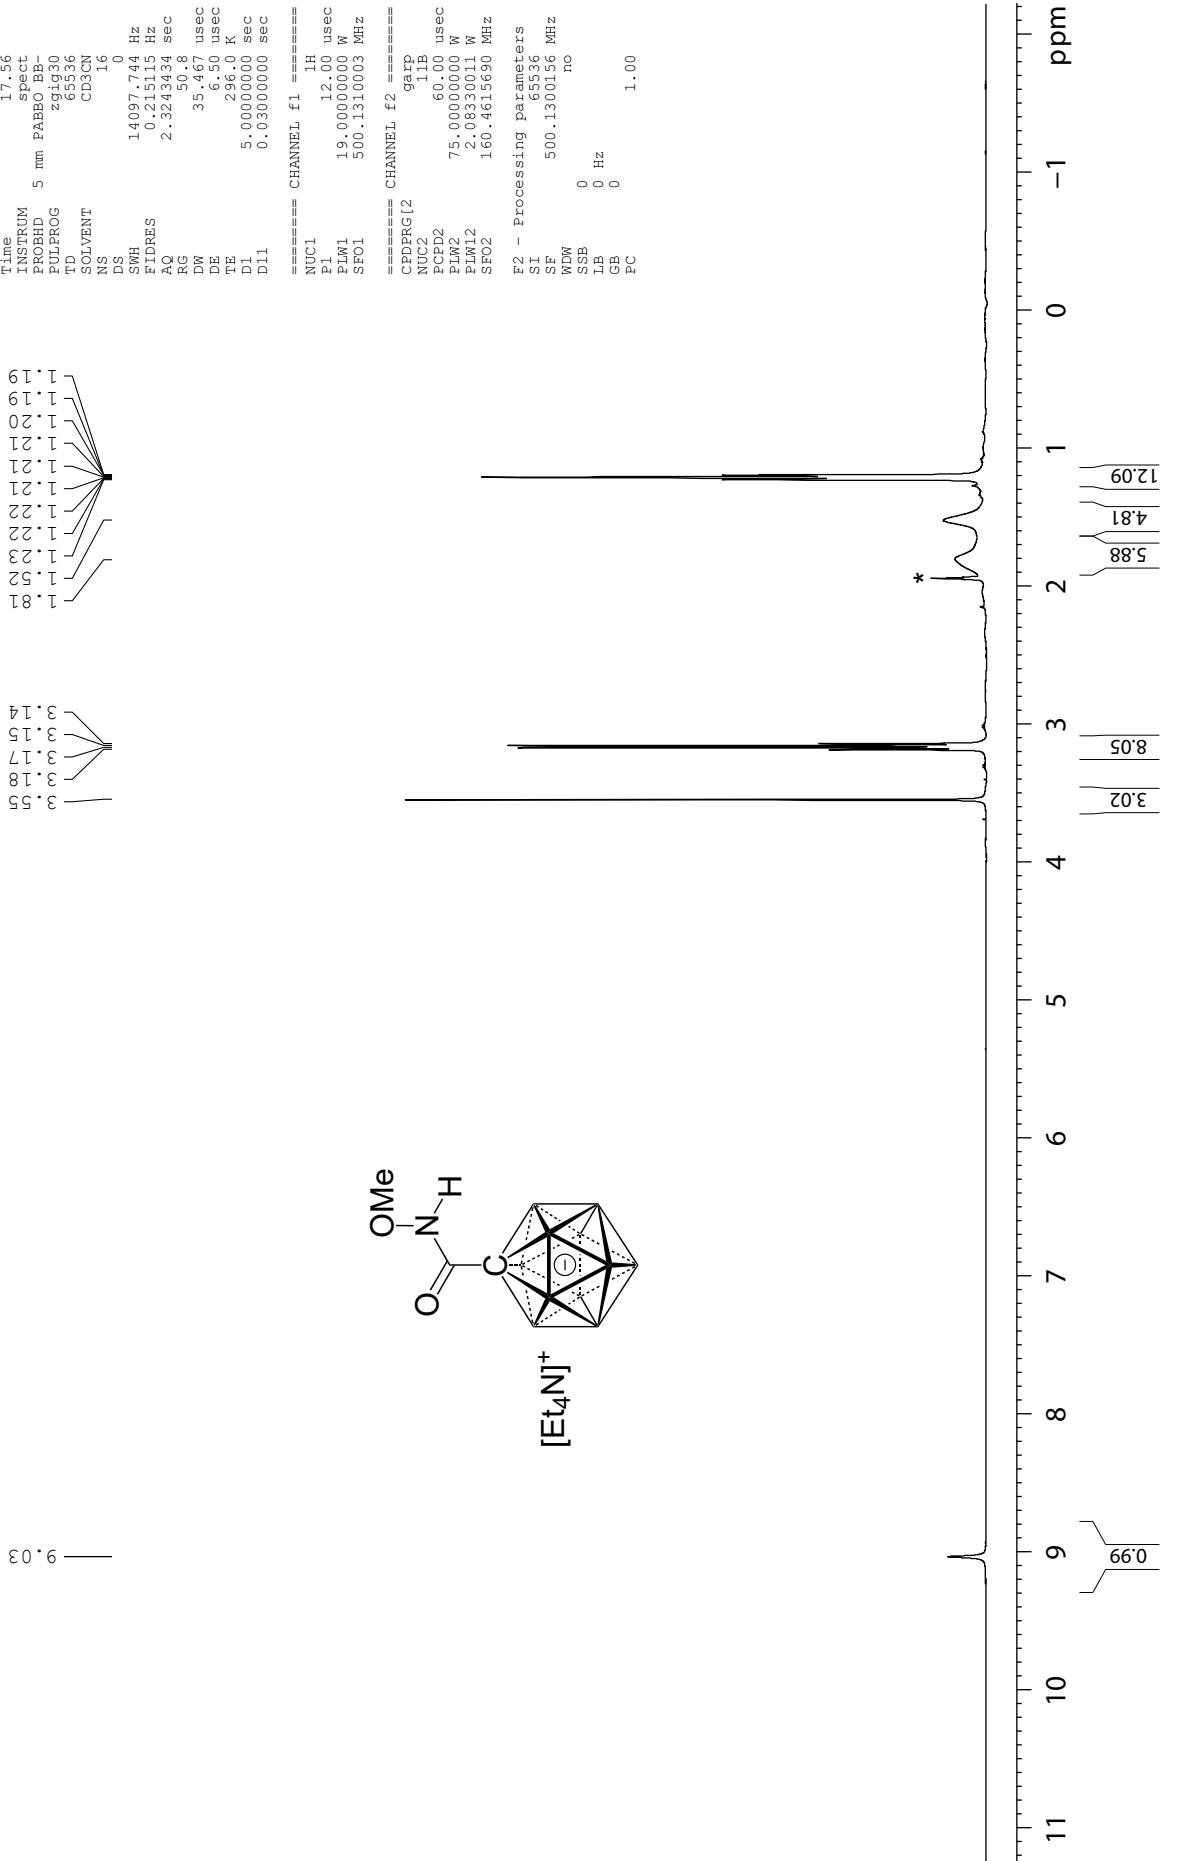

**OMe amide, ca. 24 mg in CD3CN  
11B NMR, 160 MHz, T = 22 C**

Current Data Parameters  
 NAME 20180203\_pyn\_OME amide\_201  
 EXPNO 3  
 PROCNO 1

F2 - Acquisition Parameters  
 Date\_ 20150127  
 Time\_ 17.59  
 INSTRUM spect  
 PROBHD 5 mm PABBO BB-  
 PULPROG zg  
 TD 64098  
 SOLVENT CD3CN  
 NS 32  
 DS 0  
 SWH 37051.281 Hz  
 FIDRES 0.500036 Hz  
 AQ 0.9999288 sec  
 RG 203  
 DW 15.600 usec  
 DE 16.00 usec  
 TE 295.9 K  
 D1 1.0000000 sec

==== CHANNEL f1 =====  
 NUC1 11B  
 P1 10.00 usec  
 PL1 75.000000 W  
 SFO1 160.4615792 MHz

F2 - Processing parameters  
 SI 32768  
 SF 160.4615993 MHz  
 EM  
 RDW 0  
 SSB 0  
 LB 10.00 Hz  
 GB 0  
 PC 1.40

— 15.03  
 — 13.76  
 — 12.83  
 — 7.14  
 — 6.29

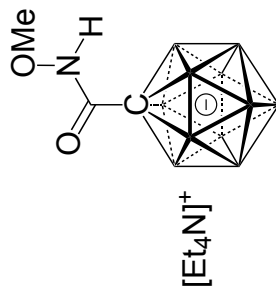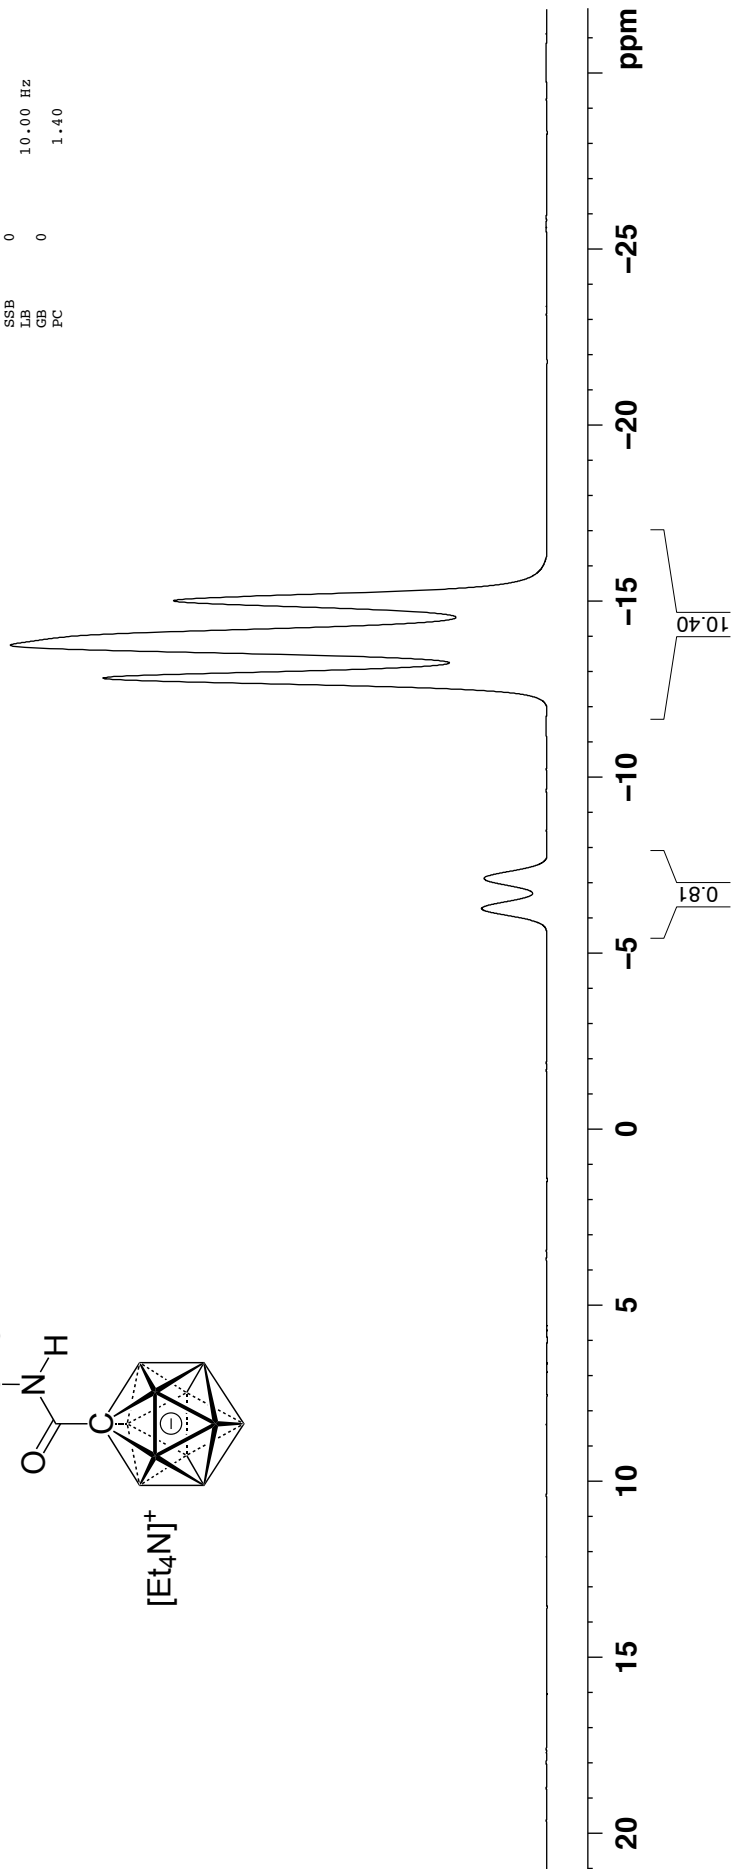

**OMe amide, ca. 24 mg in CD3CN**  
**11B NMR, 160 MHz, T = 22 C**

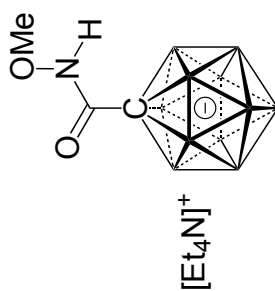

Current Data Parameters  
 NAME 20180203\_pyn\_OME\_amide\_201  
 EXPNO 4  
 PROCNO 1

F2 - Acquisition Parameters

Date\_ 20150127  
 Time\_ 18.03  
 INSTRUM spect  
 PROBD 5 mm PABBO BB-  
 PULPROG zgpg30  
 TD 65536  
 SOLVENT CD3CN  
 NS 32  
 DS 0  
 SWH 32051.281 Hz  
 FIDRES 0.489064 Hz  
 AQ 1.0223616 sec  
 RG 203  
 DW 15.600 usec  
 DE 6.50 usec  
 TE 295.9 K  
 D1 2.00000000 sec  
 D11 0.03000000 sec

==== CHANNEL f1 =====  
 NUC1 11B  
 P1 10.00 usec  
 PLW1 75.00000000 W  
 SFO1 160.4615792 MHz

==== CHANNEL f2 =====  
 CPDPRG2 waitz16  
 NUC2 1H  
 P2 80.00 usec  
 PLW2 19.00000000 W  
 SFO2 427.50001 MHz  
 SFO1 160.4615792 MHz

F2 - Processing parameters  
 SF 327.68 MHz  
 SF 160.4615993 MHz  
 NRGW 0 EM  
 SSB 0  
 LB 10.00 Hz  
 GB 0  
 PC 1.40

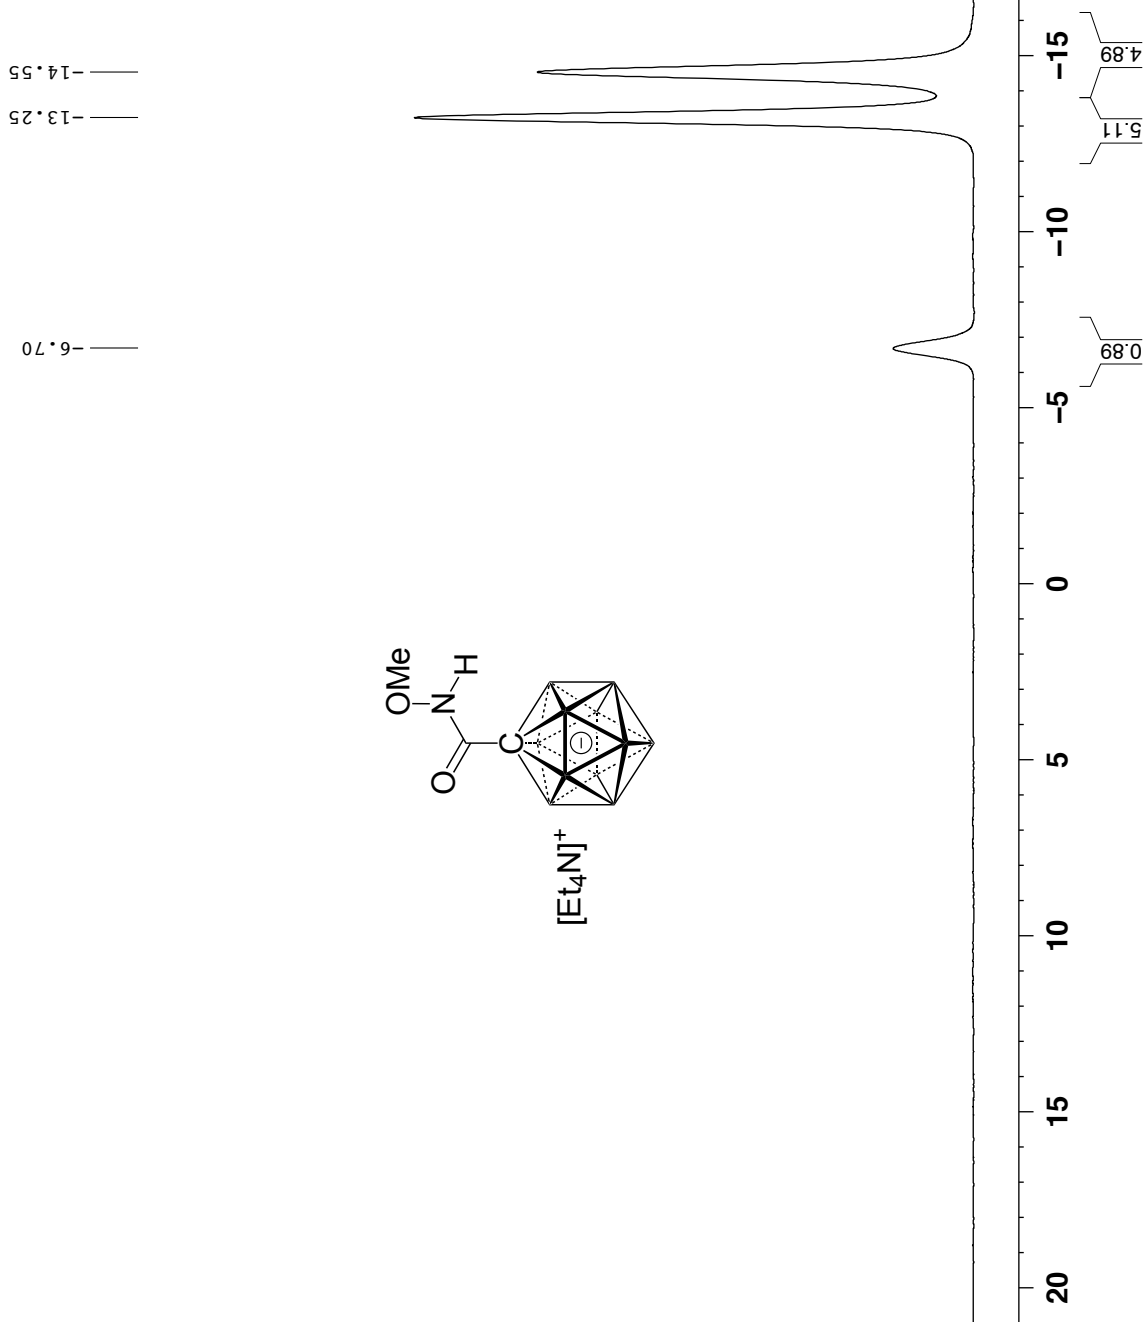

**OMe amide, ca. 24 mg in CD3CN\*  
 13C{1H} NMR, 101 MHz, T = 22 C**

Current Data Parameters  
 NAME 20180203\_pyr\_ome amide\_201  
 EXPNO 5  
 PROCNO 1

F2 - Acquisition Parameters  
 Date\_ 20150128  
 Time 3.41  
 INSTRUM spect  
 PROBHD 5 mm PABBO BB/  
 PULPROG zgpg30  
 TD 65536  
 SOLVENT CD3CN  
 NS 512  
 DS 4  
 SWH 29761.904 Hz  
 FIDRES 0.454131 Hz  
 AQ 1.1010048 sec  
 RG 193.34  
 DW 16.800 usec  
 DE 6.50 usec  
 TE 295.6 K  
 D1 1.5000000 sec  
 D11 0.0300000 sec  
 TDO 1

==== CHANNEL f1 =====  
 NUC1 13C  
 P1 10.00 usec  
 PLW1 53.0000000 W  
 SFO1 100.6228293 MHz

==== CHANNEL f2 =====  
 CPDPRG[2] waltz16  
 NUC2 1H  
 PCPD2 80.00 usec  
 PLW2 12.5000000 W  
 PLW12 0.43945000 W  
 PLW13 0.28125000 W  
 SFO2 400.1316005 MHz

F2 - Processing parameters  
 SI 32768  
 SF 100.6126733 MHz  
 EM  
 WDW 0  
 SSB 0  
 LB 8.00 Hz  
 GB 0  
 PC 1.40

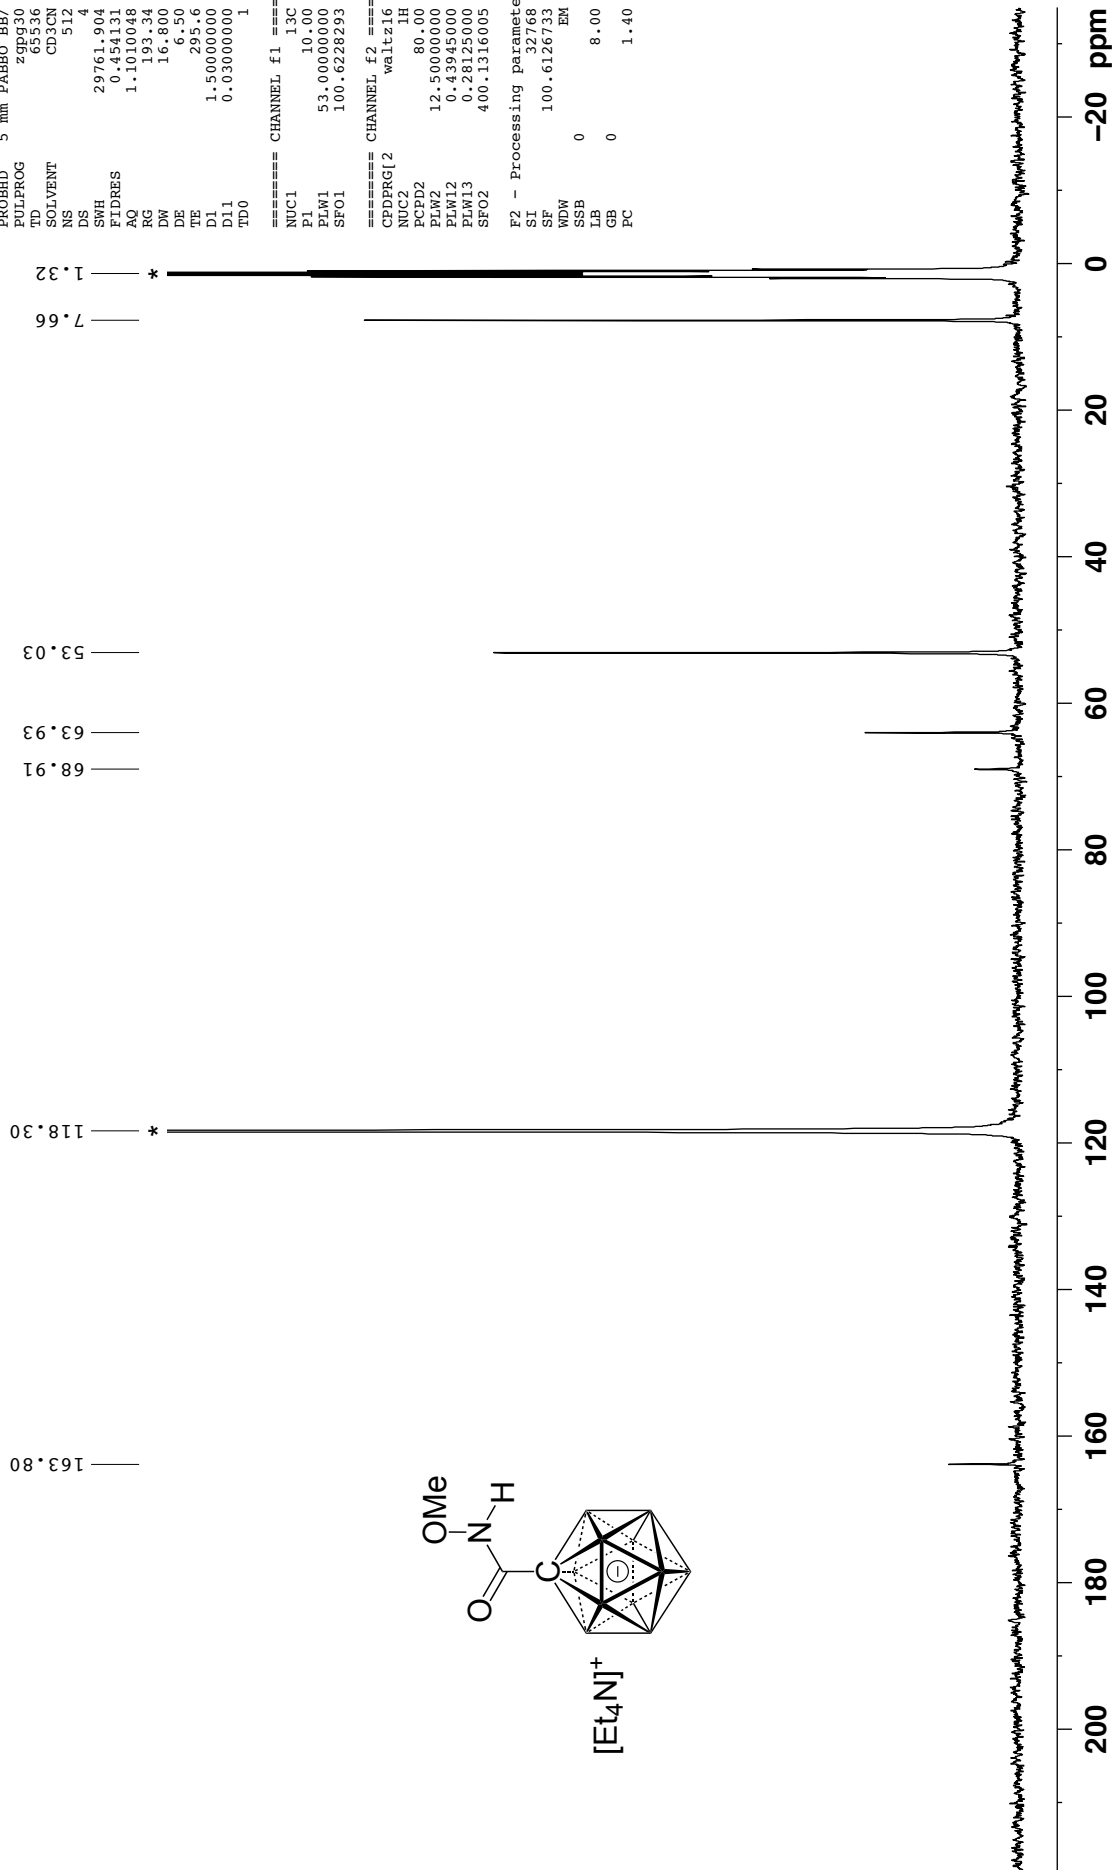



[Et4N][CB11H11-CONHisopropyl], Ca. 30mg in acetone-d6  
 11H{11B}, 400 MHz, T=22 °C

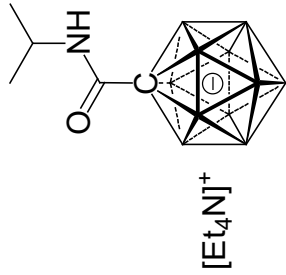

```

Current Data Parameters
NAME      20180129-zhk-i-isopropyl
EXPNO    2
PROCNO   1

F2 - Acquisition Parameters
Date_    20180131
Time     23.41
INSTRUM spect
PROBHD   5 mm PABBO BB/
PULPROG zgpg30
TD       16384
SOLVENT  Acetone
NS       16
DS       4
SWH      8012.820 Hz
FIDRES   0.489064 Hz
AQ       1.0223616 sec
RG       64.43
DM       62.400 usec
DE       6.50 usec
TE       294.2 K
D1       1.00000000 sec
D11      0.03000000 sec
TD0      1

===== CHANNEL f1 =====
NUC1     1H
P1       15.00 usec
PLM1     12.50000000 MHz
SFO1     400.1320007 MHz

===== CHANNEL f2 =====
CPDPRG2  garr4
NUC2     11B
P2       90.10 usec
PLM2     52.9659960 MHz
SFO2     128.3776050 MHz

F2 - Processing parameters
SI       32768
SF       400.1300073 MHz
WDW      EM
SSB      0
LB       1.00 Hz
GB       0
FC       1.40
    
```

2.05  
1.89  
1.74  
1.60  
1.41  
1.41  
1.41  
1.40  
1.39  
1.39  
1.39  
1.39  
1.38  
1.37  
1.37  
1.06  
1.04

3.78  
3.51  
3.49  
3.47  
3.45

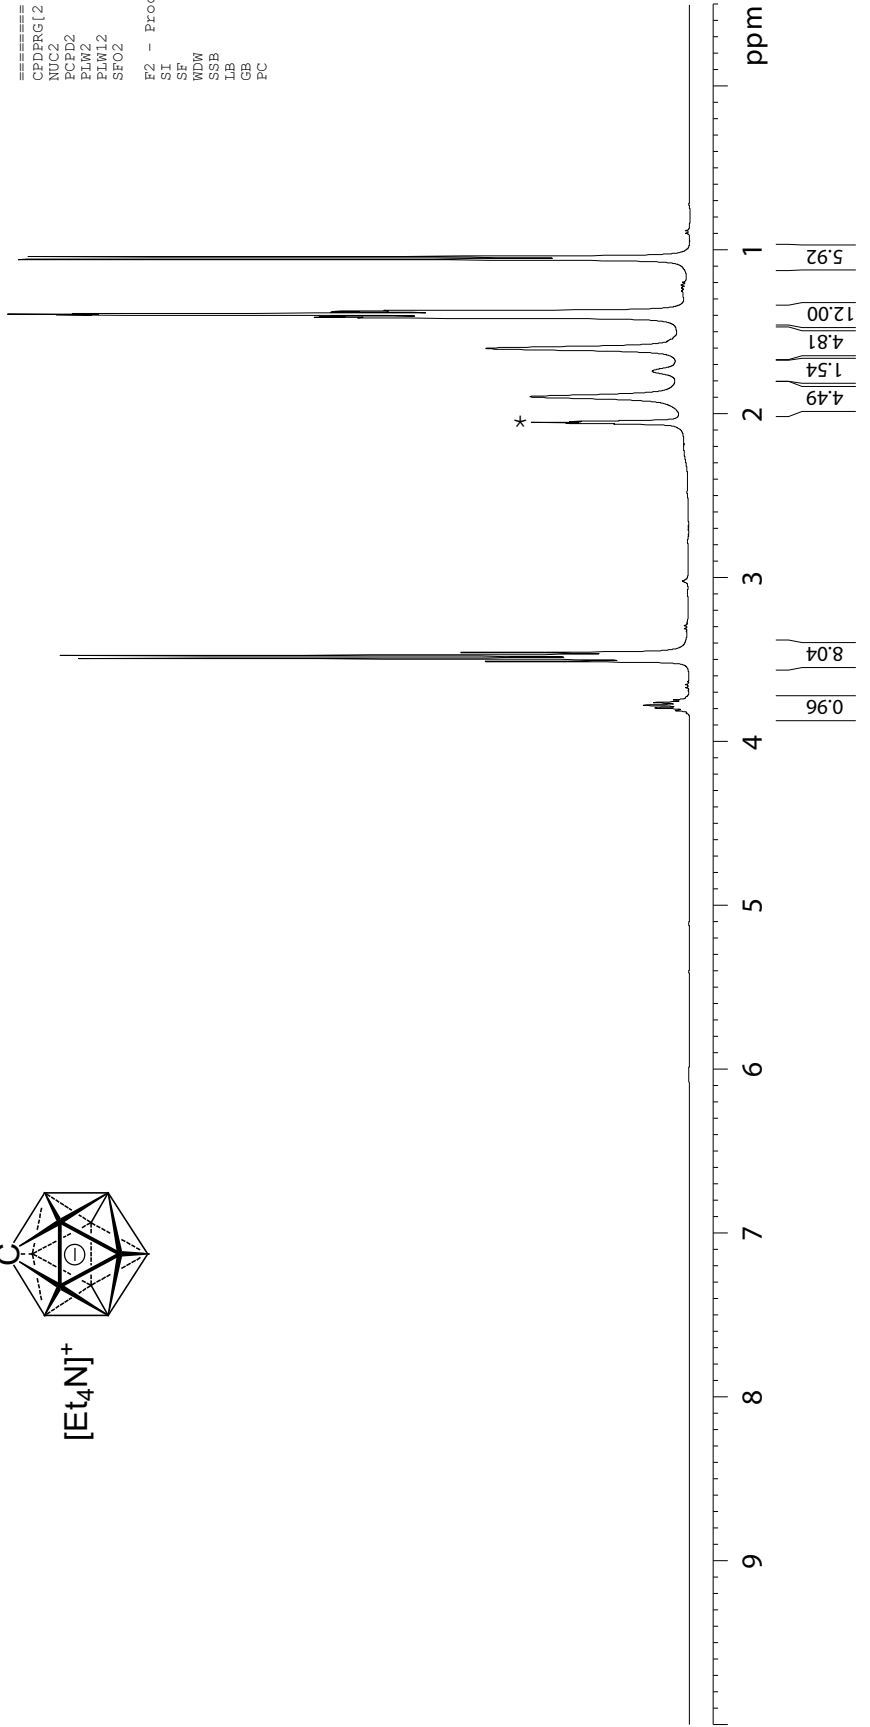

**[Et<sub>4</sub>N][CB11H11-CONHisopropyl], Ca. 30mg in acetone-d<sub>6</sub>  
11B, 128 MHz, T = 22 C**

Current Data Parameters  
 NAME 20180129-zhk-isopropyl  
 EXPNO 3  
 PROCNO 1

F2 - Acquisition Parameters  
 Date\_ 20180131  
 Time 23.46  
 INSTRUM spect  
 PROBHD 5 mm PABBO BB/  
 PULPROG zg  
 TD 65536  
 SOLVENT Acetone  
 NS 128  
 DS 4  
 SWH 25510.203 Hz  
 FIDRES 0.389255 Hz  
 AQ 1.2845056 sec  
 RG 193.34  
 DM 19.600 usec  
 DE 6.50 usec  
 TE 294.1 K  
 D1 1.00000000 sec  
 TD0 1

==== CHANNEL f1 =====  
 NUC1 11B  
 P1 9.93 usec  
 PL1 52.9659960 W  
 SF01 128.3776052 MHz

F2 - Processing Parameters  
 SI 32768  
 SF 128.3776050 MHz  
 WDW EM  
 SSB 0  
 LB 1.00 Hz  
 GB 0  
 FC 1.40

12.60  
13.69  
14.89  
6.52  
7.59

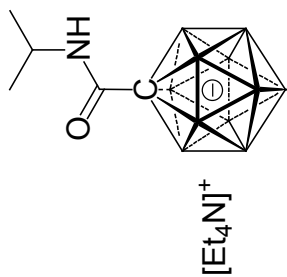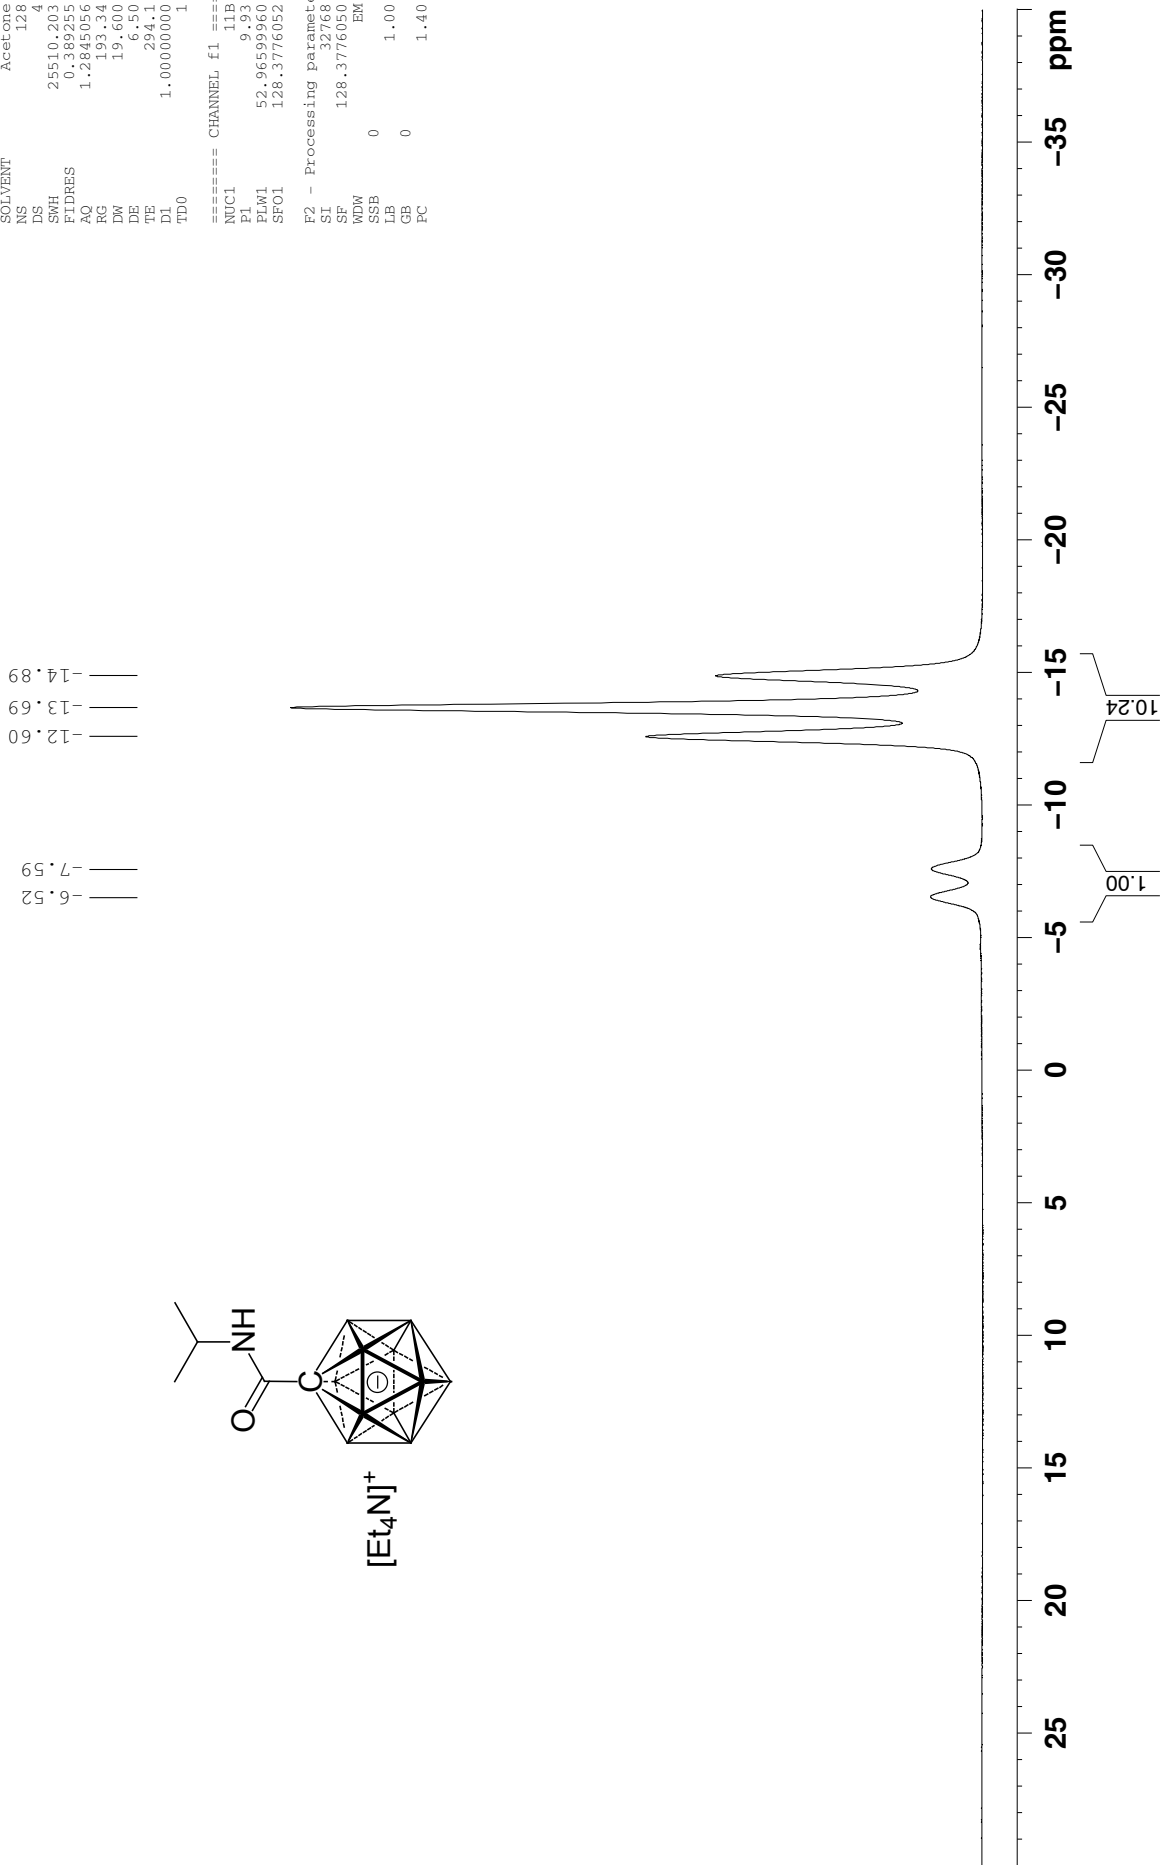

**[Et4N][CB11H11-CONHisopropyl], Ca. 30mg in acetone-d6  
11B{1H}, 128 MHz, T= 22 C**

Current Data Parameters  
 NAME 20180129-zhk-isopropyl  
 EXPNO 4  
 PROCNO 1

F2 - Acquisition Parameters  
 Date\_ 20180131  
 Time 23:53  
 INSTRUM spect  
 PROBHD 5 mm PABBO BB/  
 PULPROG zgpg30  
 TD 65536  
 SOLVENT Acetone  
 NS 128  
 DS 4  
 SWH 25510.203 Hz  
 FIDRES 0.389255 Hz  
 AQ 1.2845056 sec  
 RG 193.34  
 DM 19.600 usec  
 DE 6.50 usec  
 TE 294.9 K  
 D1 1.00000000 sec  
 D11 0.03000000 sec  
 TD0 1

==== CHANNEL f1 =====  
 NUC1 11B  
 P1 9.93 usec  
 FLM1 52.9659960 W  
 SFO1 128.3776050 MHz  
 ===== CHANNEL f2 =====  
 CPDPRG2 waltz16  
 NUC2 1H  
 P2 80.00 usec  
 FLM2 12.5000000 W  
 FLM3 0.2394500 W  
 FLM4 0.2812500 W  
 SFO2 400.1320007 MHz  
 F2 - Processing parameters  
 SI 32768  
 SF 128.3776050 MHz  
 EM  
 ADW 0  
 SSB 0  
 LB 1.00 Hz  
 GB 0  
 FC 1.40

14.30  
13.14  
7.06

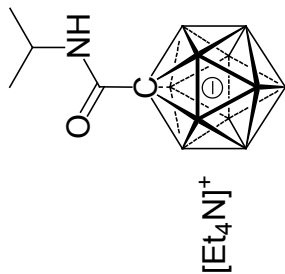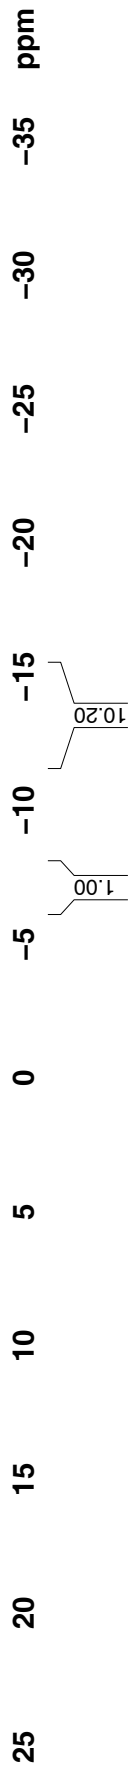

**[Et<sub>4</sub>N][CB11H<sub>11</sub>-CONHisopropyl], Ca. 30mg in acetone-d<sub>6</sub>  
<sup>13</sup>C{<sup>1</sup>H}, 100 MHz, T= 22 C**

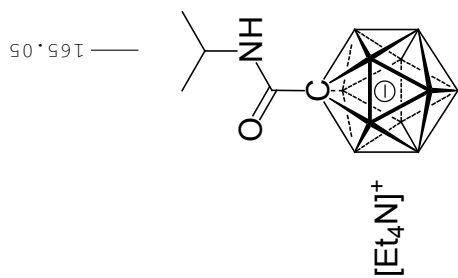

Current Data Parameters  
 NAME 20180129-zhk-isopropyl  
 EXPNO 5  
 PROCNO 1

F2 - Acquisition Parameters  
 Date\_ 20180201  
 Time 0.39  
 INSTRUM spect  
 PROBHD 5 mm PABBO BB/  
 PULPROG zgpg30  
 TD 65536  
 SOLVENT Acetone  
 NS 1024  
 DS 4  
 SWH 29761.904 Hz  
 FIDRES 0.454131 Hz  
 AQ 1.1010048 sec  
 RG 193.34  
 DW 16.800 usec  
 DE 6.50 usec  
 TE 295.0 K  
 D1 1.50000000 sec  
 D1.1 0.03000000 sec  
 TD0 1

==== CHANNEL f1 =====  
 NUC1 <sup>13</sup>C  
 P1 10.00 usec  
 PLW1 53.00000000 W  
 SFO1 100.6228293 MHz

==== CHANNEL f2 =====  
 CPDPRG[2] waltz16  
 NUC2 <sup>1</sup>H  
 PCPD2 80.00 usec  
 PLW2 12.50000000 W  
 PLW12 0.43945000 W  
 PLW13 0.28125000 W  
 SFO2 400.1316005 MHz

F2 - Processing parameters  
 SI 32768  
 SF 100.6126658 MHz  
 WDW EM  
 SSB 0  
 LB 3.00 Hz  
 GB 0  
 FC 1.40

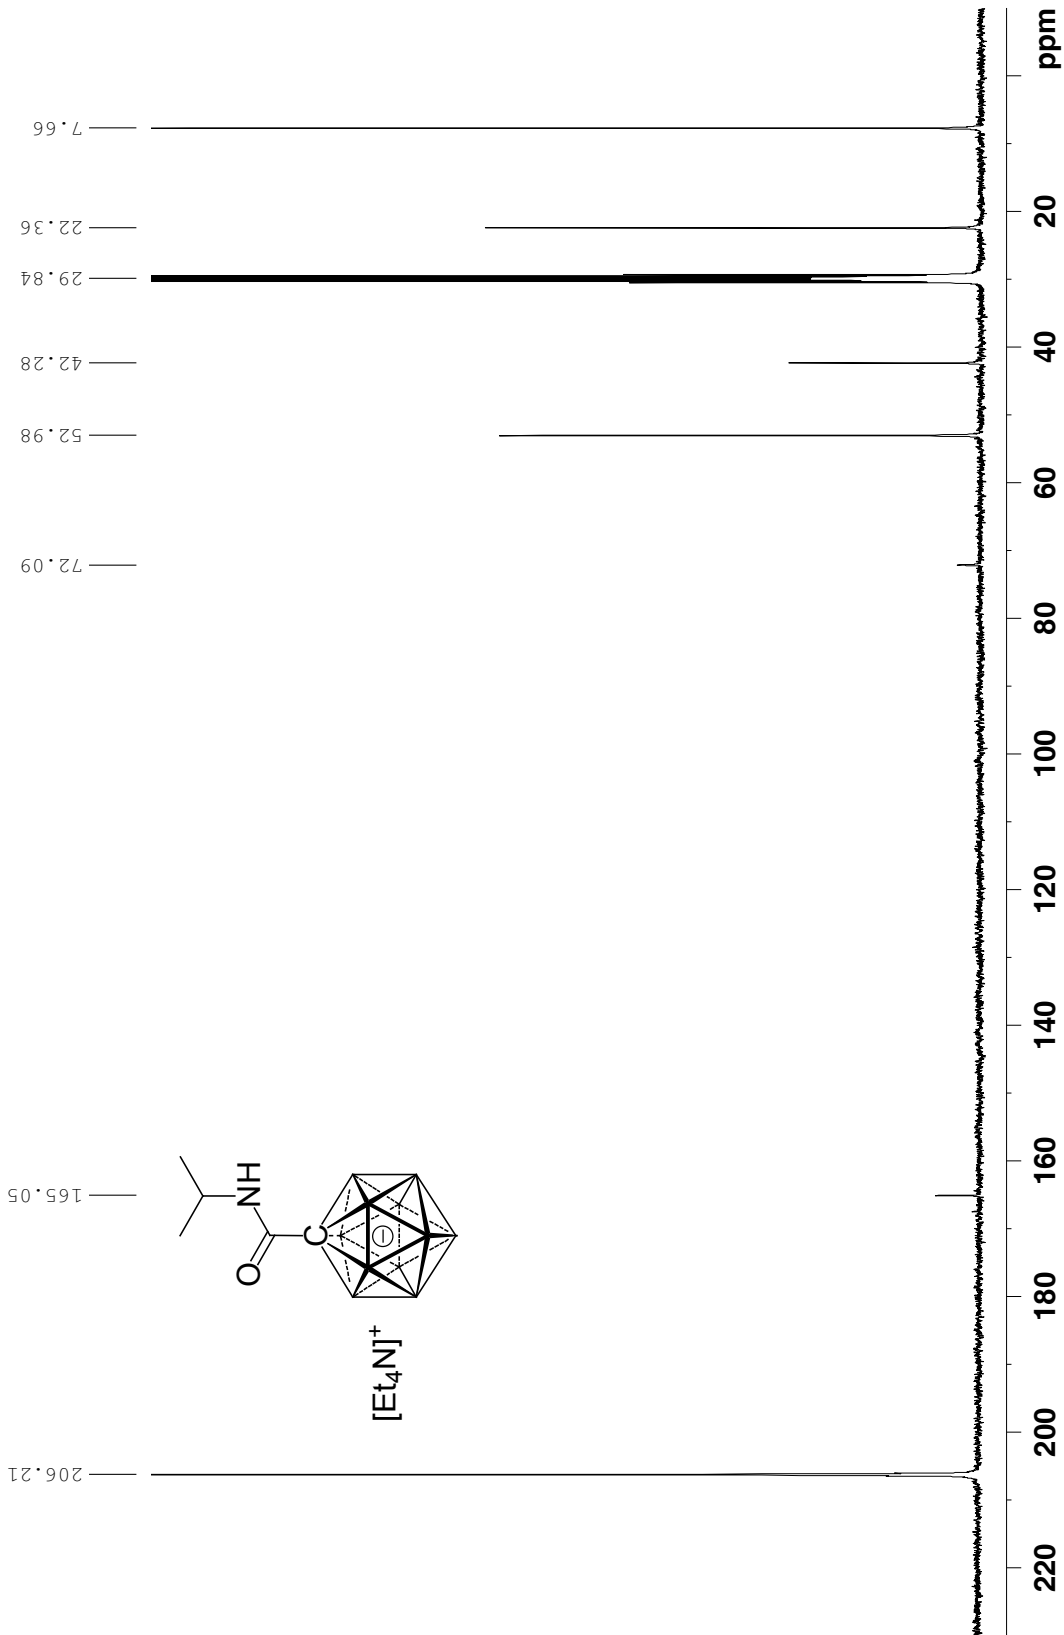

[Et<sub>4</sub>N][CB11H<sub>11</sub>-CONHCyclohex], Ca. 20mg in acetone-d<sub>6</sub> \*  
 11H(1B), 400 MHz, T= 22 °C

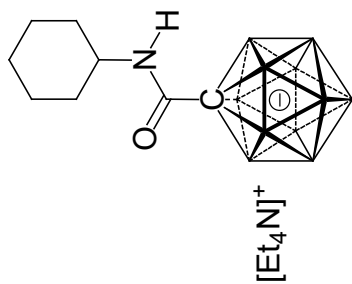

Current Data Parameters  
 NAME 20180110-zhk-cyclohex  
 EXPNO 1  
 PROCNO 1

F2 - Acquisition Parameters  
 Date\_ 20180111  
 Time\_ 22.15  
 INSTRUM spect  
 PROBHD 5 mm PABBO BB/  
 PULPROG zgpg30  
 TD 16384  
 SOLVENT Acetone  
 NS 16  
 DS 4  
 SWH 8012.820 Hz  
 FIDRES 0.489064 Hz  
 AQ 1.0223616 sec  
 RG 52.99  
 DW 62.400 usec  
 DE 6.50 usec  
 TE 293.7 K  
 D1 1.00000000 sec  
 D11 0.03000000 sec  
 TDO 1

==== CHANNEL f1 =====  
 NUC1 1H  
 P1 15.00 usec  
 PL1 12.50000000 W  
 SFO1 400.1320007 MHz

==== CHANNEL f2 =====  
 CPDPRG2 garr4  
 NUC2 11B  
 P2 90.00 usec  
 PL2 52.96599960 W  
 PL12 6.00377998 W  
 SFO2 128.3776050 MHz

F2 - Processing parameters  
 SI 32768  
 SF 400.1300073 MHz  
 WDM 0  
 SSB 0  
 LB 1.00 Hz  
 GB 0  
 FC 1.40

3.51  
3.49  
3.47  
3.45  
2.05  
1.90  
1.72  
1.68  
1.65  
1.60  
1.40  
1.39  
1.37  
1.24

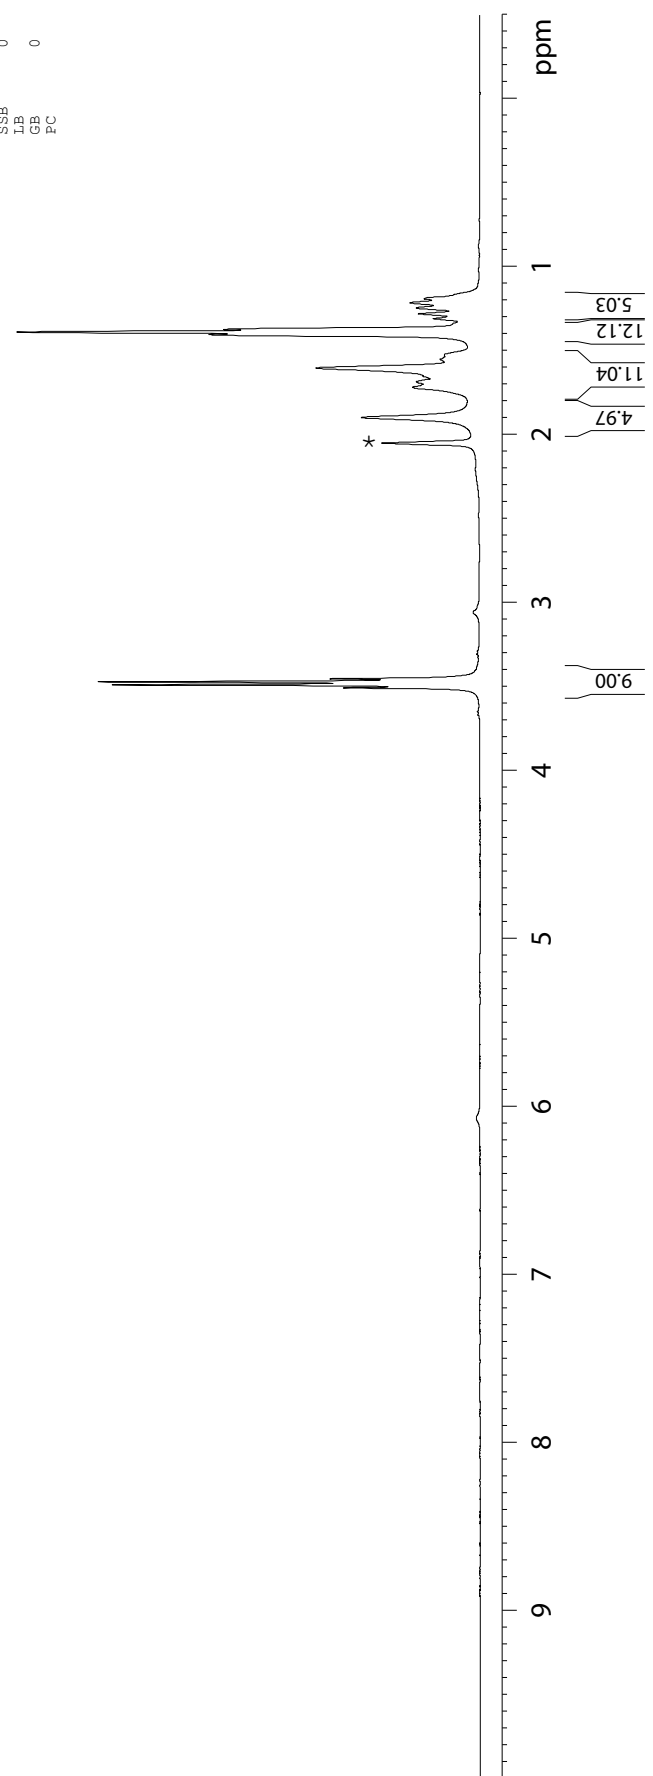

**[Et<sub>4</sub>N][CB11H<sub>11</sub>-CONHCyclohex], Ca. 20mg in acetone-d<sub>6</sub>  
11B, 128 MHz, T= 22 C**

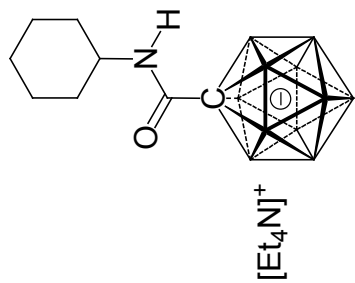

Current Data Parameters  
NAME 20180110-zhk-cyclohex  
EXPNO 3  
PROCNO 1

F2 - Acquisition Parameters  
Date\_ 20180111  
Time 22.27  
INSTRUM spect  
PROBHD 5 mm PABBO BB/  
PULPROG zg  
TD 65536  
SOLVENT Acetone  
NS 128  
DS 4  
SWH 25510.203 Hz  
FIDRES 0.389255 Hz  
AQ 1.2845056 sec  
RG 193.34  
DW 19.600 usec  
DE 6.50 usec  
TE 293.9 K  
D1 1.00000000 sec  
TD0 1

==== CHANNEL f1 =====  
NUC1 11B  
PI 9.93 usec  
PLM1 52.9659960 MHz  
SFO1 128.3776052 MHz

F2 - Processing parameters  
SI 32768  
SF 128.3776050 MHz  
WDW EM  
SSB 0  
LB 1.00 Hz  
GB 0  
FC 1.40

12.59  
13.68  
14.88  
6.56  
7.60

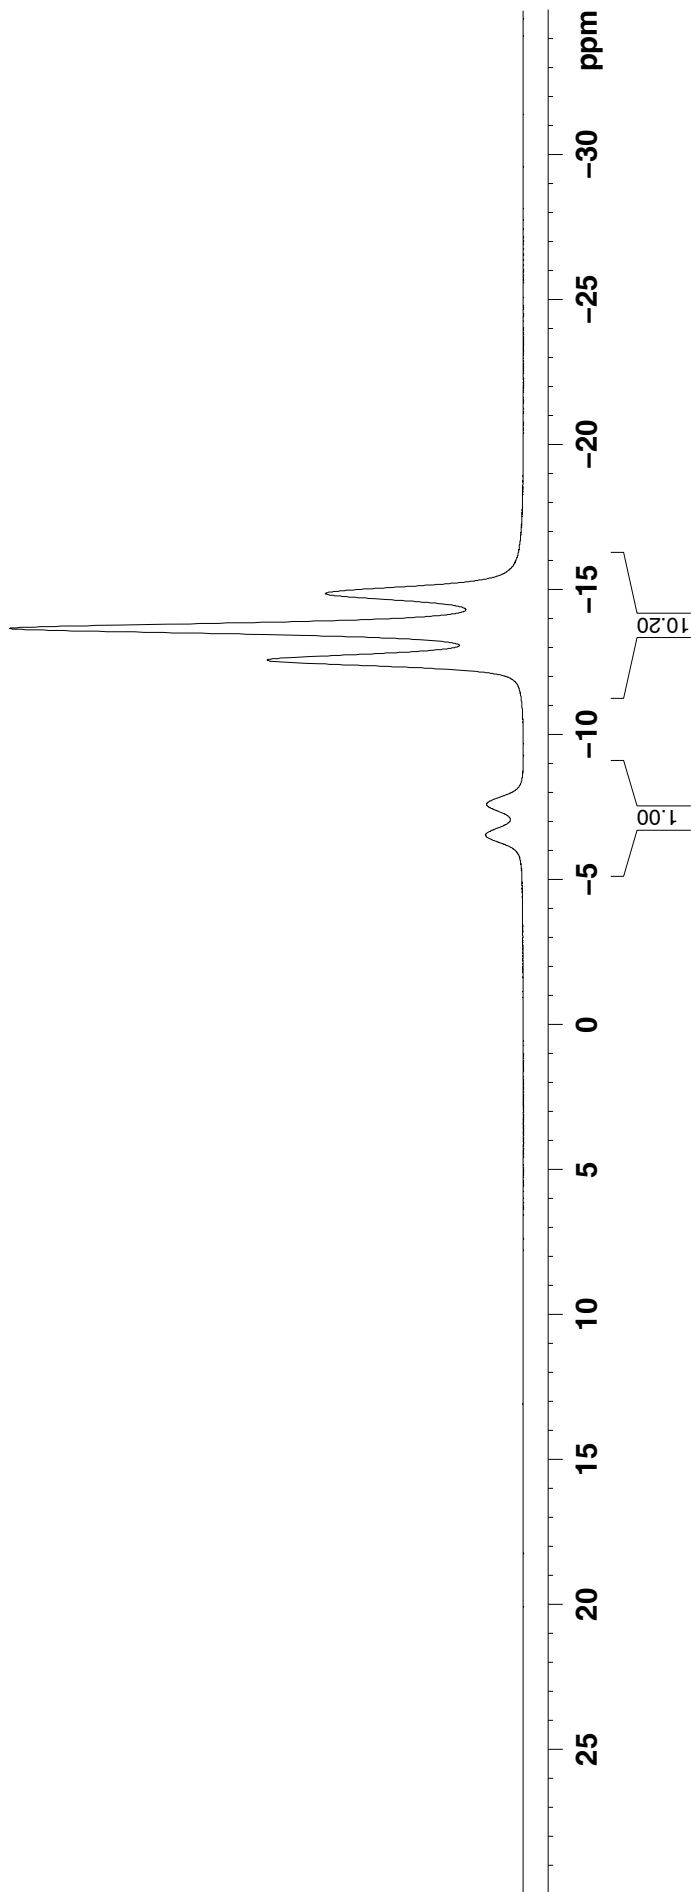

**[Et<sub>4</sub>N][CB11H<sub>11</sub>-CONHCyclohex], Ca. 20mg in acetone-d<sub>6</sub>  
11B{1H}, 128 MHz, T = 22 C**

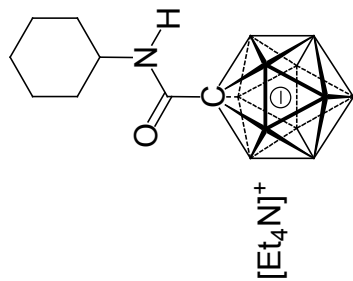

Current Data Parameters  
 NAME 20180110-zhk-cyclohex  
 EXPNO 2  
 PROCNO 1

F2 - Acquisition Parameters  
 Date\_ 20180111  
 Time 22.22  
 INSTRUM spect  
 PROBHD 5 mm PARBO BB/  
 PULPROG zgpg30  
 TD 65536  
 SOLVENT Acetone  
 NS 128  
 DS 4  
 SWH 25510.203 Hz  
 FIDRES 0.389255 Hz  
 AQ 1.2845056 sec  
 RG 193.34  
 DW 19.600 usec  
 DE 6.50 usec  
 TE 294.4 K  
 D1 1.00000000 sec  
 D11 0.03000000 sec  
 TD0 1

==== CHANNEL f1 =====  
 NUC1 11B  
 P1 9.93 usec  
 PLW1 52.9659960 W  
 SFO1 128.3776050 MHz

==== CHANNEL f2 =====  
 CPDPRG[2] waltz16  
 NUC2 1H  
 P2 80.00 usec  
 PLW2 12.50000000 W  
 PLW1 0.43945000 W  
 PLW2 0.28135000 W  
 SFO2 400.1320007 MHz

F2 - Processing parameters  
 SI 32768  
 SF 128.3776050 MHz  
 EQ  
 WDM 0  
 LB 1.00 Hz  
 GB 0  
 PC 1.40

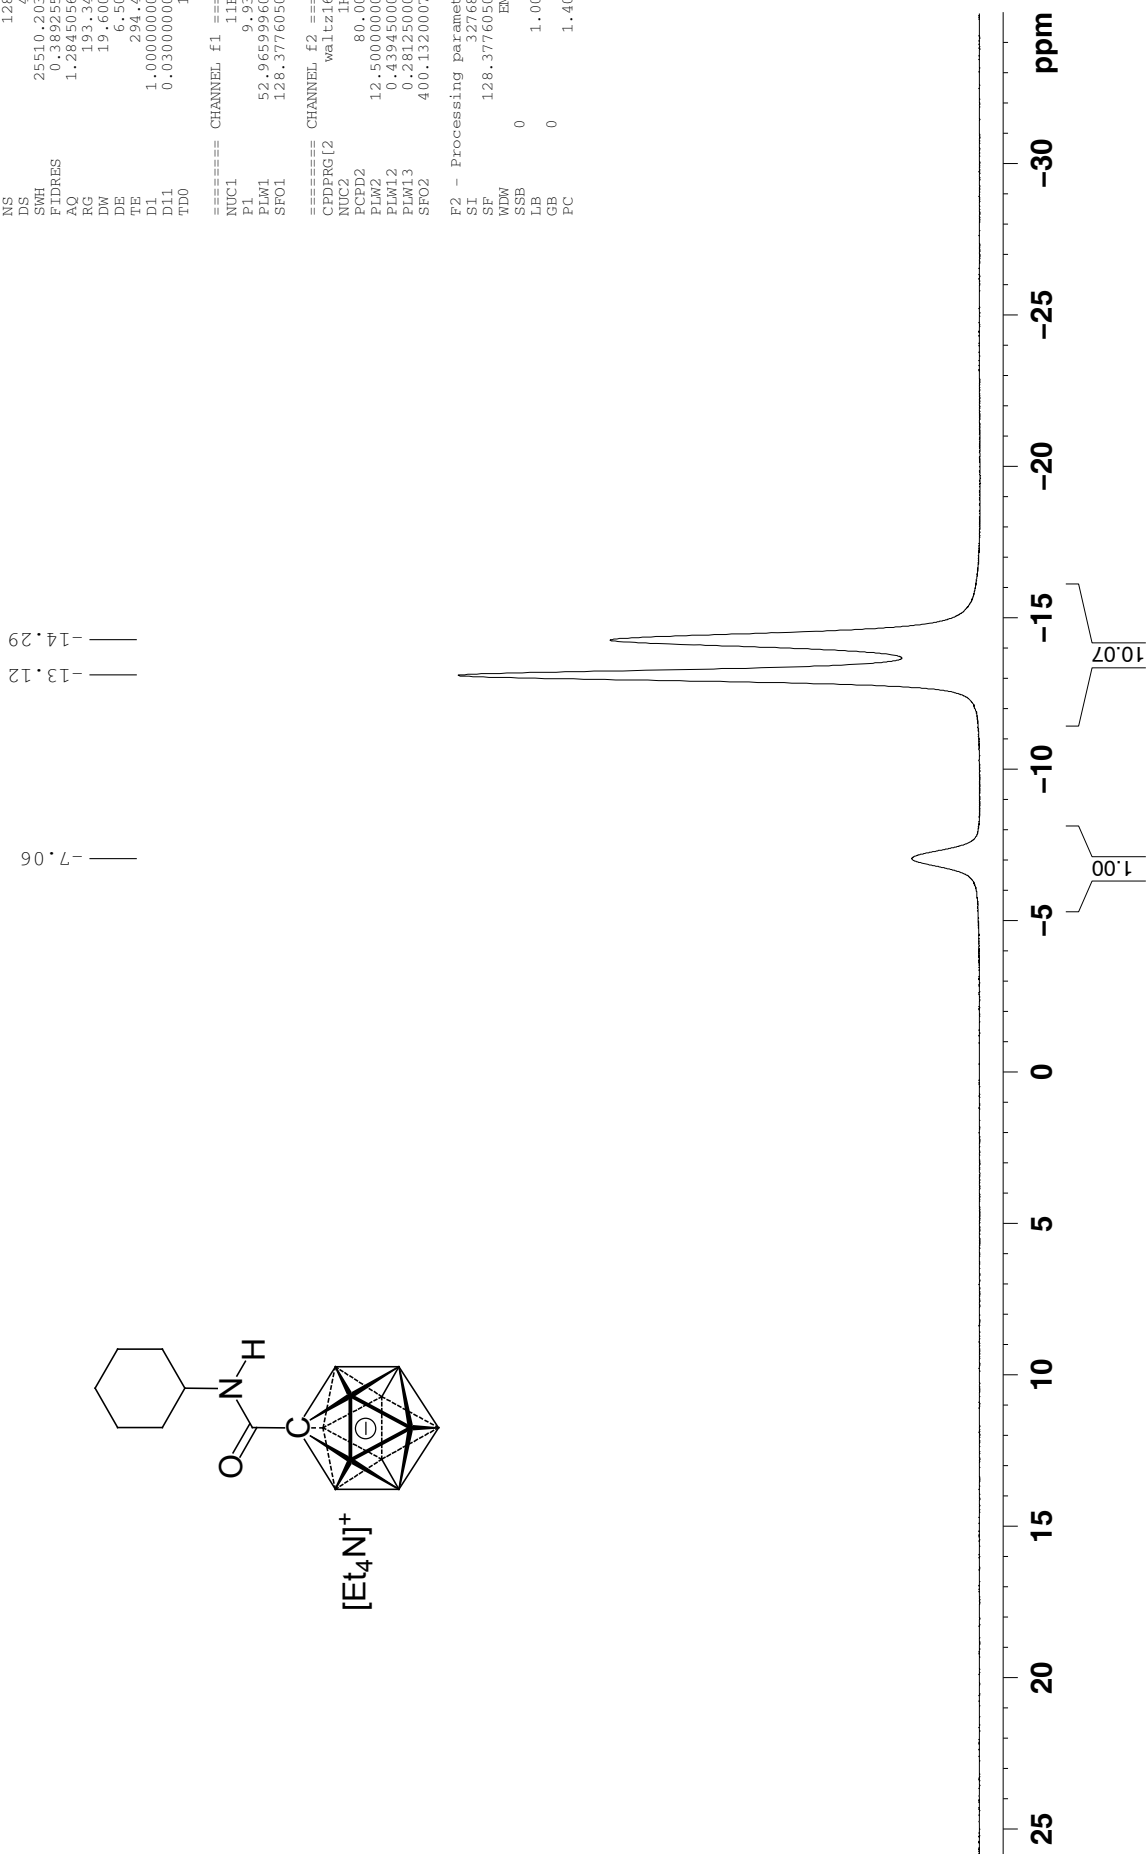

**[Et4N][CB11H11-CONHCyclohex], Ca. 20mg in acetone-d6  
13C{1H}, 100 MHz, T= 22 C**

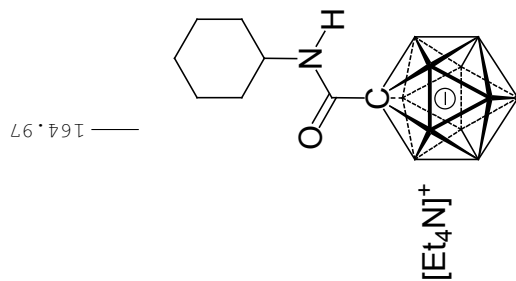

Current Data Parameters  
 NAME 20180110-zhk-cyclohex  
 EXPNO 4  
 PROCNO 1

F2 - Acquisition Parameters  
 Date\_ 20180111  
 Time 23.14  
 INSTRUM spect  
 PROBHD 5 mm PABBO BB/  
 PULPROG zgpg30  
 TD 65536  
 SOLVENT Acetone  
 NS 1024  
 DS 4  
 SWH 29761.904 Hz  
 FIDRES 0.454131 Hz  
 AQ 1.1010048 sec  
 RG 193.34  
 DW 16.800 usec  
 DE 6.50 usec  
 TE 294.3 K  
 D1 1.50000000 sec  
 D11 0.03000000 sec  
 TD0 1

==== CHANNEL f1 =====  
 NUC1 13C  
 P1 10.00 usec  
 PLW1 53.00000000 W  
 SFO1 100.6228293 MHz

==== CHANNEL f2 =====  
 CPDPRG12 waltz16  
 NUC2 1H  
 PCPD2 80.00 usec  
 PLW2 12.50000000 W  
 PLM12 0.43945000 W  
 PLM13 0.28125000 W  
 SFO2 400.1316005 MHz

F2 - Processing parameters  
 SI 32768  
 SF 100.6126863 MHz  
 NDM 0  
 SSB 0  
 LB 0  
 GB 0  
 PC 1.40

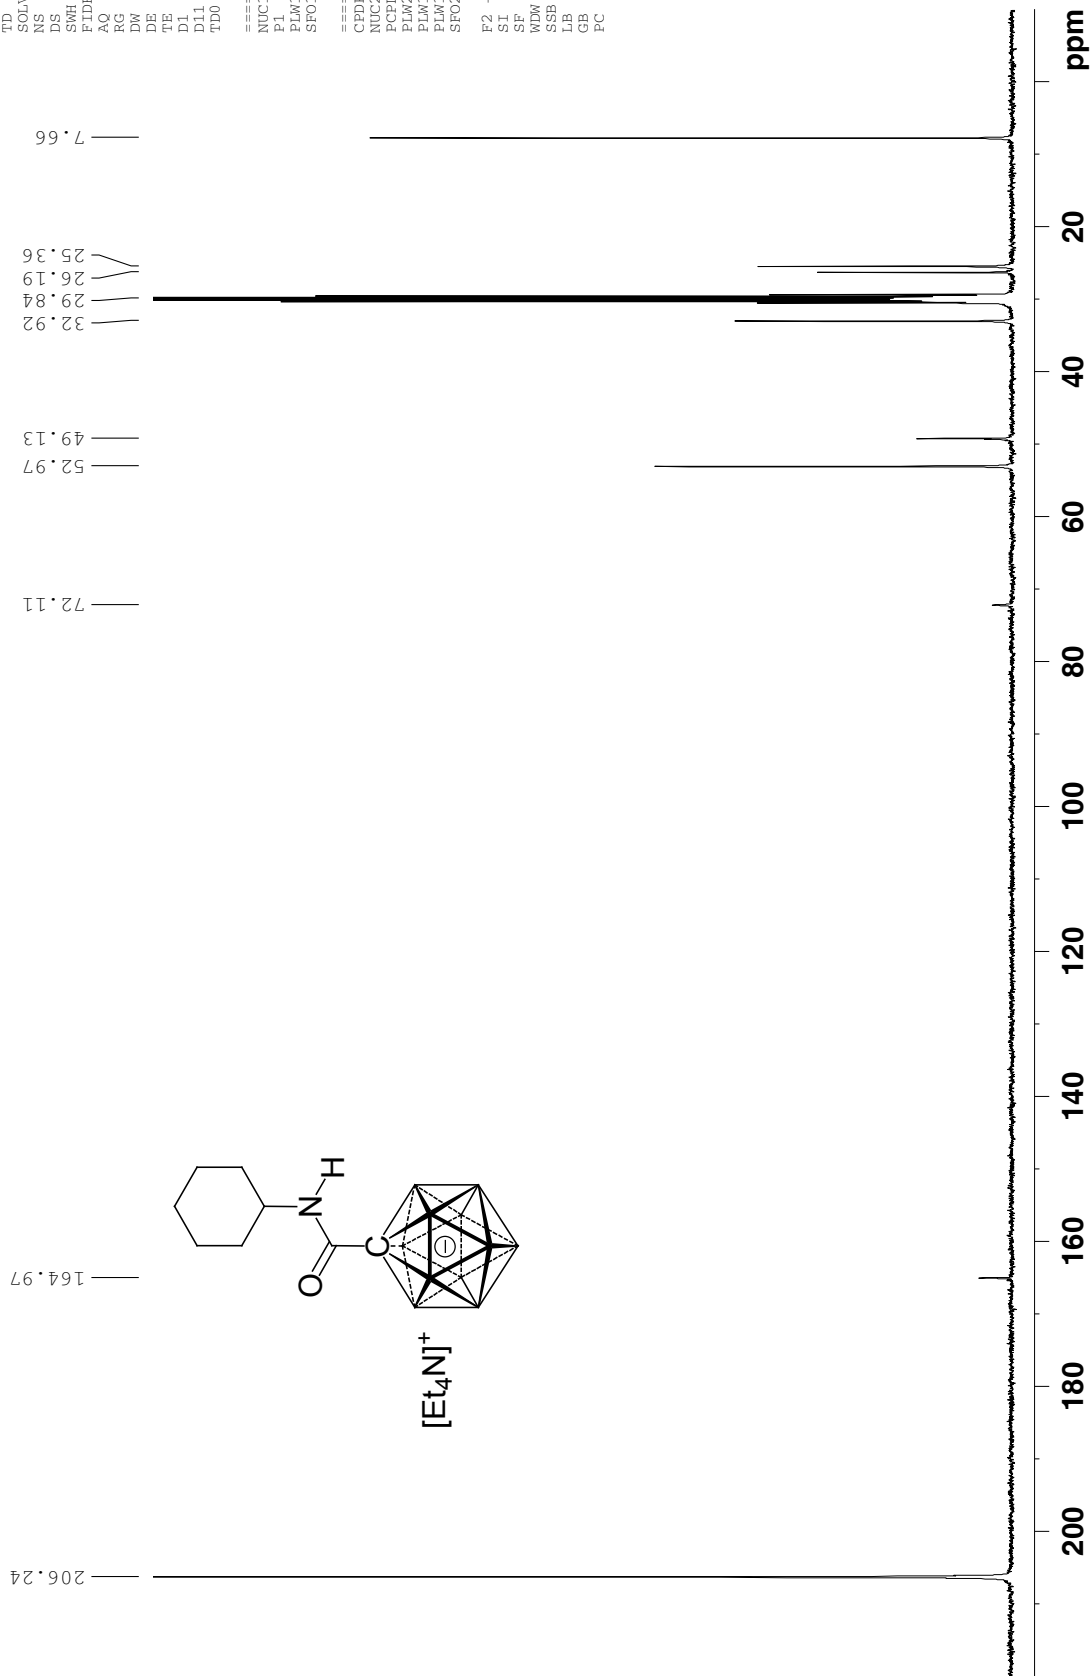



[Et4N][CB11H11-CONHtBu], Ca. 20mg in acetone-d6 \*  
<sup>11</sup>H{<sup>1</sup>H}, 400 MHz, T= 22 °C

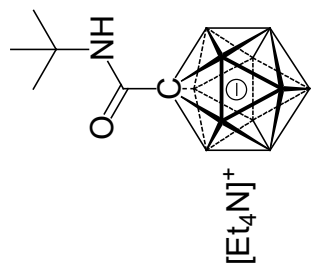

Current Data Parameters  
 NAME 20180119-zhk-t-butyl  
 EXPNO 2  
 PROCNO 1

F2 - Acquisition Parameters  
 Date\_ 20180120  
 Time\_ 14.16  
 INSTRUM spect  
 PROBD 5 mm F400 BB/  
 PULPROG zgpg30  
 TD 16384  
 SOLVENT Acetone  
 NS 16  
 DS 4  
 SWH 8012.820 Hz  
 FIDRES 0.489064 Hz  
 AQ 1.0223616 sec  
 RG 64.43  
 DW 62.400 usec  
 DE 6.50 usec  
 TE 294.8 K  
 D1 1.00000000 sec  
 D11 0.03000000 sec  
 TD0 1

==== CHANNEL f1 =====  
 NUC1 1H  
 P1 15.00 usec  
 PL1 12.50000000 W  
 SF1 400.1320007 MHz  
 ===== CHANNEL f2 =====  
 CPDPRG[2] garpa  
 NUC2 1H  
 P2 90.00 usec  
 PL2 52.96599960 W  
 SF2 400.1320007 MHz  
 F2 - Processing parameters  
 SI 32768  
 SF 400.1300075 MHz  
 EM  
 WDW 0  
 SSB 0  
 LB 1.00 Hz  
 GB 0  
 FC 1.40

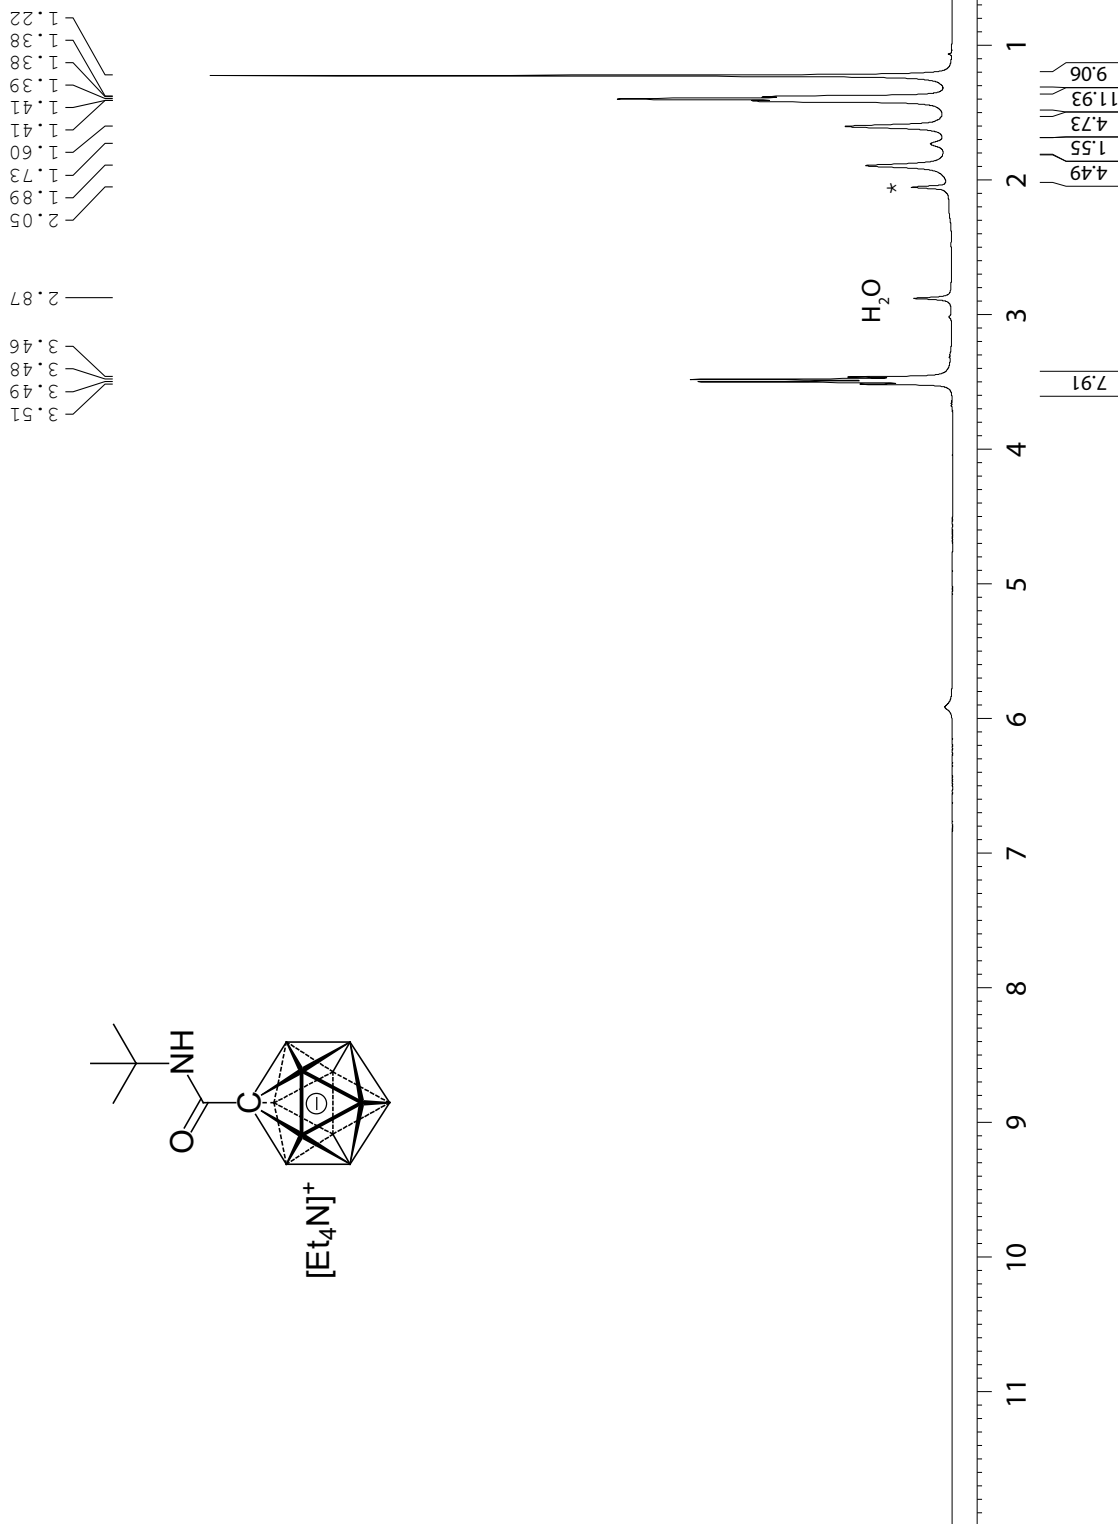

**[Et<sub>4</sub>N][CB11H<sub>11</sub>-CONHtBu], Ca. 20mg in acetone-d<sub>6</sub>  
11B, 128 MHz, T= 22 C**

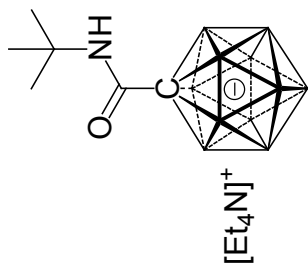

Current Data Parameters  
 NAME 20180119-zhk-t-butyl  
 EXPNO 3  
 PROCNO 1

F2 - Acquisition Parameters  
 Date\_ 20180120  
 Time\_ 14.22  
 INSTRUM spect  
 PROBD 5 mm PABBO BB/  
 PULPROG zg  
 TD 65536  
 SOLVENT Acetone  
 NS 128  
 DS 4  
 SMH 25510.203 Hz  
 FIDRES 0.389255 Hz  
 AQ 1.2845056 sec  
 RG 193.34  
 DW 19.600 usec  
 DE 6.50 usec  
 TE 295.0 K  
 D1 1.00000000 sec  
 TD0 1

==== CHANNEL f1 =====  
 NUC1 11B  
 P1 9.93 usec  
 PL1 52.9659960 W  
 SF01 128.3776052 MHz  
 F2 - Processing parameters  
 SI 32768  
 SF 128.3776050 MHz  
 WDW EM  
 SSB 0  
 LB 1.00 Hz  
 GB 0  
 PC 1.40

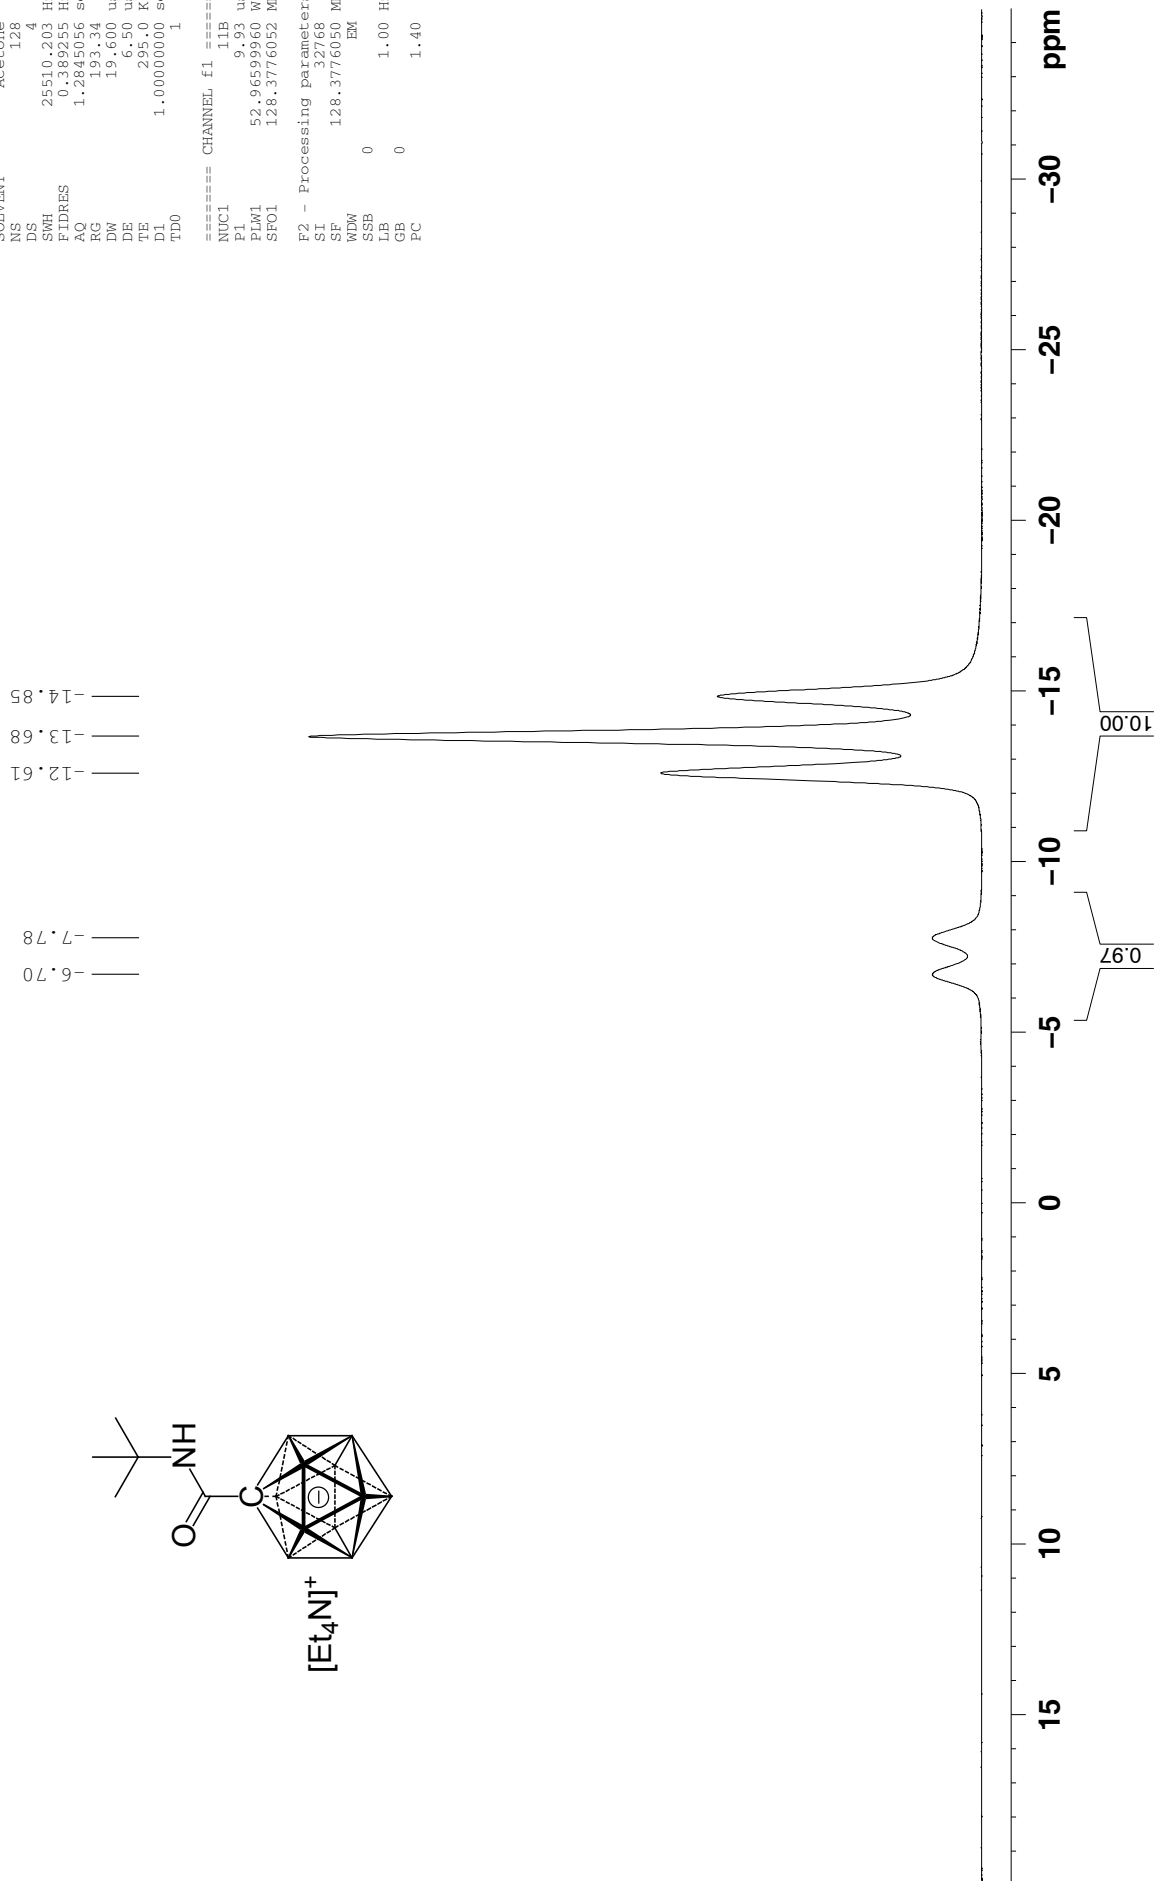

**[Et<sub>4</sub>N][CB11H<sub>11</sub>-CONHtBu], Ca. 20mg in acetone-d<sub>6</sub>  
<sup>11</sup>B{<sup>1</sup>H}, 128 MHz, T= 22 C**

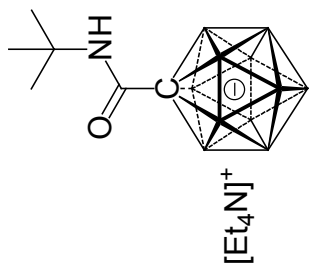

Current Data Parameters  
 NAME 20180119-zhk-t-butyl  
 EXPNO 4  
 PROCNO 1

F2 - Acquisition Parameters  
 Date\_ 20180120  
 Time\_ 14.28  
 INSTRUM spect  
 PROBH 5 mm PABBO BB/  
 PULPROG zgpg30  
 TD 65536  
 SOLVENT Acetone  
 NS 128  
 DS 4  
 SMH 25510.203 Hz  
 FIDRES 0.389255 Hz  
 AQ 1.2845056 sec  
 RG 193.34  
 DM 19.600 usec  
 DE 6.50 usec  
 TE 295.6 K  
 D1 1.0000000 sec  
 D11 0.0300000 sec  
 TD0 1

==== CHANNEL f1 =====  
 NUC1 <sup>11</sup>B  
 P1 9.93 usec  
 PLW1 52.9659960 W  
 SF01 128.3776050 MHz  
 =====  
 CHANNEL f2 =====  
 CPDPRG[2] waltz16  
 NUC2 <sup>1</sup>H  
 PCPD2 80.00 usec  
 PLW2 12.5000000 W  
 PLW3 0.43945000 W  
 PLW4 0.28725000 W  
 SF02 400.1320007 MHz

F2 - Processing parameters  
 SI 32768  
 SF 128.3776050 MHz  
 WDW EM  
 SSB 0  
 LB 1.00 Hz  
 GB 0  
 FC 1.40

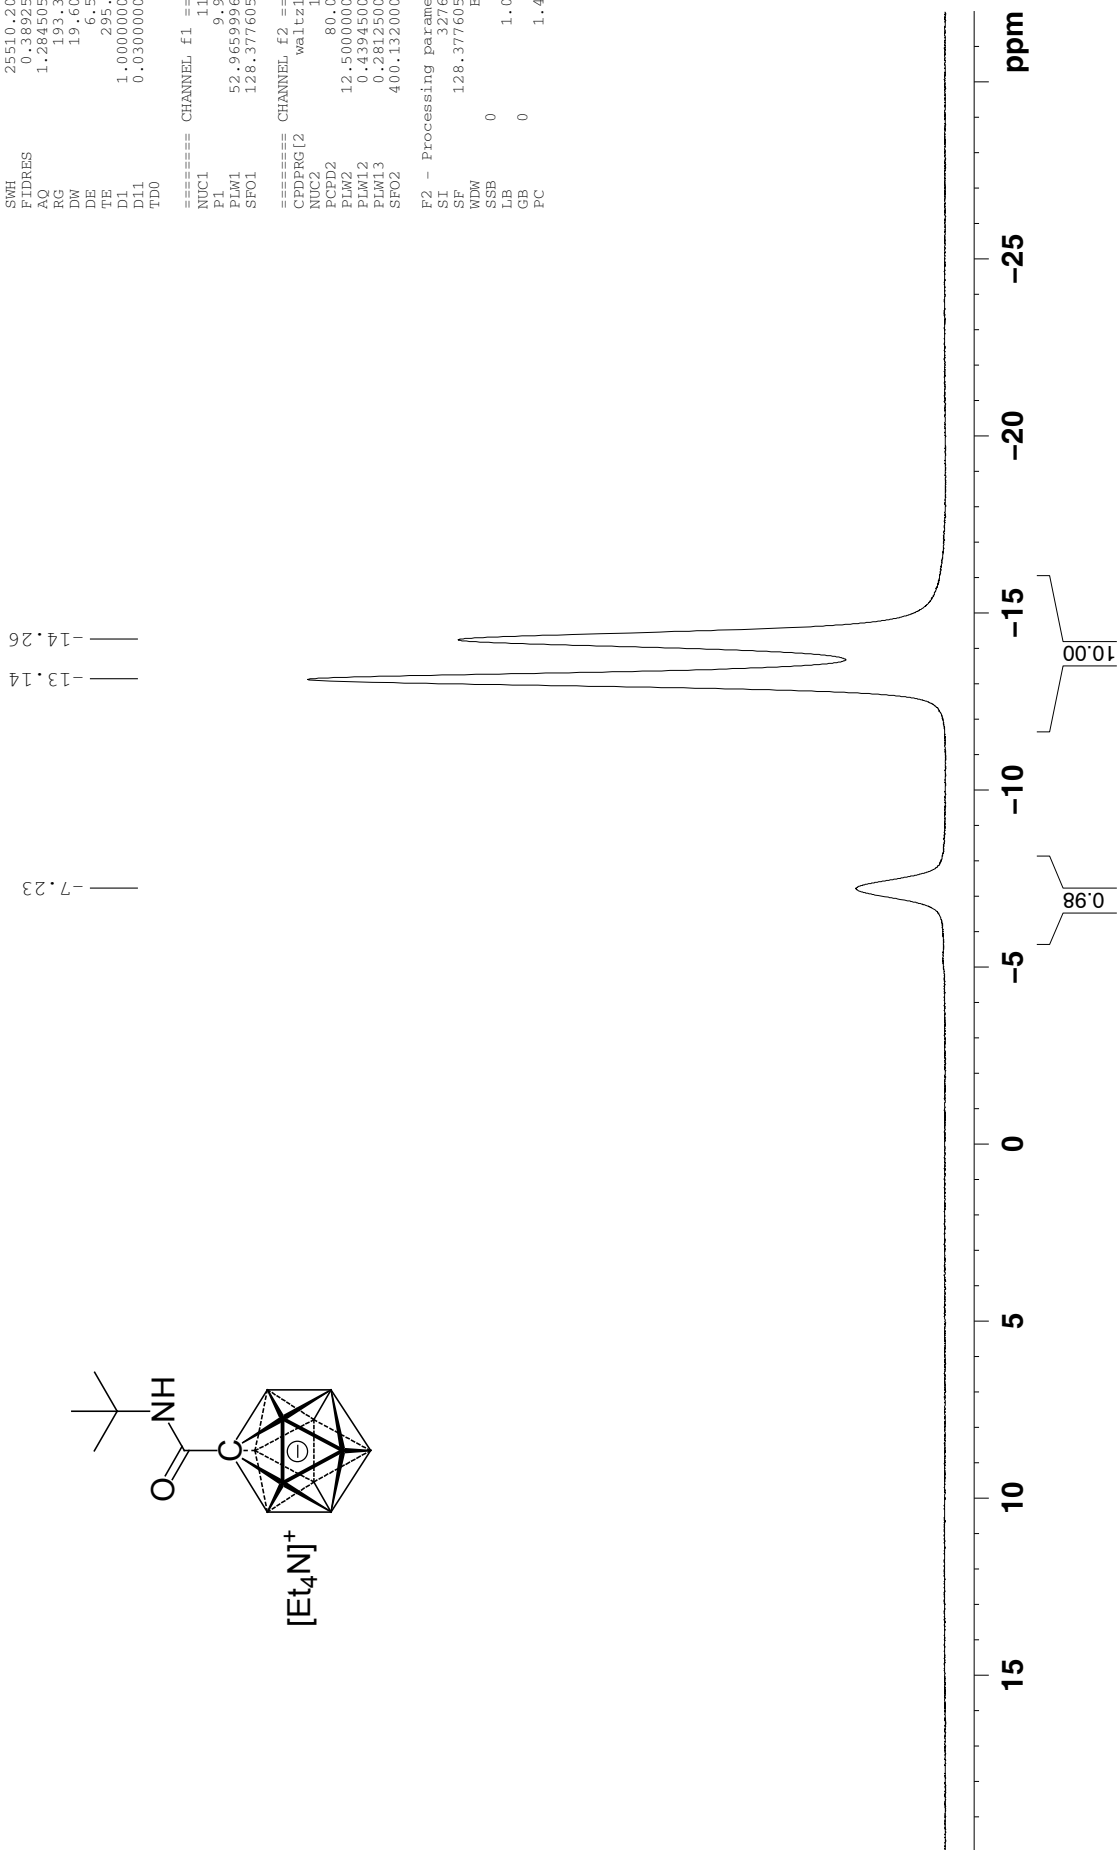

**[Et4N][CB11H11-CONHtBu], Ca. 20mg in acetone-d6  
13C{1H}, 100 MHz, T= 22 C**

Current Data Parameters  
 NAME 20180119-zhk-t-butyl  
 EXPNO 5  
 PROCNO 1

F2 - Acquisition Parameters  
 Date\_ 20180120  
 Time 14.53  
 INSTRUM spect  
 PROBHD 5 mm PABBO BB/  
 PULPROG zgpg30  
 TD 65536  
 SOLVENT Acetone  
 NS 512  
 DS 4  
 SWH 29761.904 Hz  
 FIDRES 0.454131 Hz  
 AQ 1.1010048 sec  
 RG 193.34  
 DW 16.800 usec  
 DE 6.50 usec  
 TE 295.5 K  
 D1 1.50000000 sec  
 D11 0.03000000 sec  
 TD0 1

==== CHANNEL f1 =====  
 NUC1 13C  
 P1 10.00 usec  
 PLW1 53.00000000 W  
 SFO1 100.6228293 MHz

==== CHANNEL f2 =====  
 CPDPRG[2] waltz16  
 NUC2 1H  
 PCPD2 80.00 usec  
 PLW2 12.50000000 W  
 PLW12 0.43945000 W  
 PLW13 0.28125000 W  
 SFO2 400.1316005 MHz

F2 - Processing parameters  
 SI 32768  
 SF 100.6126855 MHz  
 NDM 0  
 SSB 0  
 LB 2.00 Hz  
 GB 0  
 PC 1.40

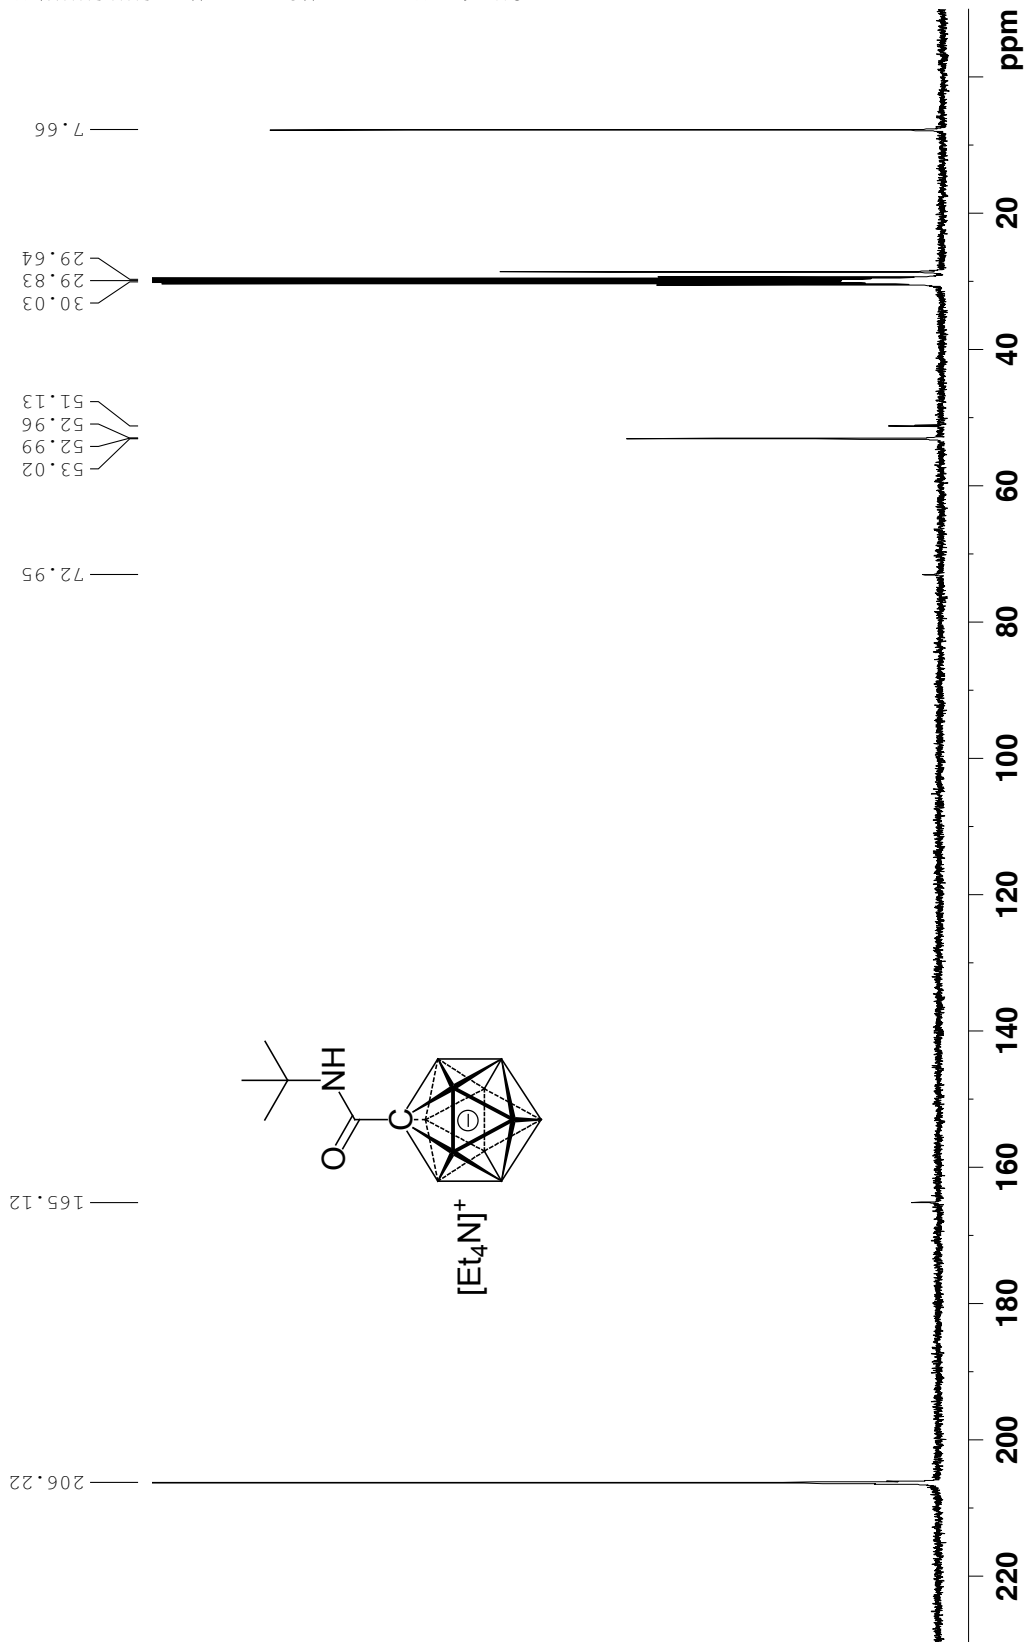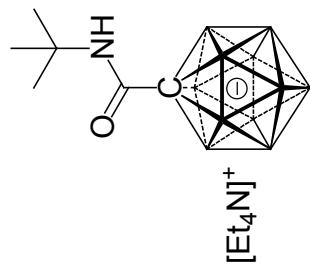

[Et<sub>4</sub>N][CB11H<sub>11</sub>-CONPip], Ca. 30mg in acetone-d<sub>6</sub> \*  
<sup>1</sup>H{<sup>1</sup>H}, 400 MHz, T = 22 °C

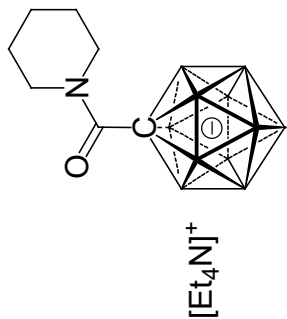

Current Data Parameters  
 NAME 20171214-zhk-C5H11N  
 EXPNO 1  
 PROCNO 1

F2 - Acquisition Parameters  
 Date\_ 20171216  
 Time\_ 22.42  
 INSTRUM spect  
 PROBHD 5 mm PABBO BB/  
 PULPROG zgig30  
 TD 16384  
 SOLVENT Acetone  
 NS 16  
 DS 4  
 SWH 8012.820 Hz  
 FIDRES 0.489064 Hz  
 AQ 1.0223616 sec  
 RG 71.39  
 DW 62.400 usec  
 DE 6.50 usec  
 TE 296.0 K  
 D1 1.00000000 sec  
 D11 0.03000000 sec  
 TDO 1

==== CHANNEL f1 =====  
 NUC1 <sup>1</sup>H  
 P1 15.00 usec  
 PLW1 12.50000000 W  
 SFO1 400.1320007 MHz

==== CHANNEL f2 =====  
 CPDPRG2 garp4  
 NUC2 <sup>11</sup>B  
 PCPD2 90.00 usec  
 PLW2 52.96599960 W  
 PLM2 0.64477998 W  
 SFO2 128.3776050 MHz

F2 - Processing Parameters  
 SI 32768  
 SF 400.1300093 MHz  
 WDW EM  
 SSB 0  
 GB 0  
 PC 1.40

3.65  
3.51  
3.49  
3.47  
3.45

2.05  
2.05  
1.84  
1.60  
1.44  
1.44  
1.42  
1.41  
1.39  
1.37

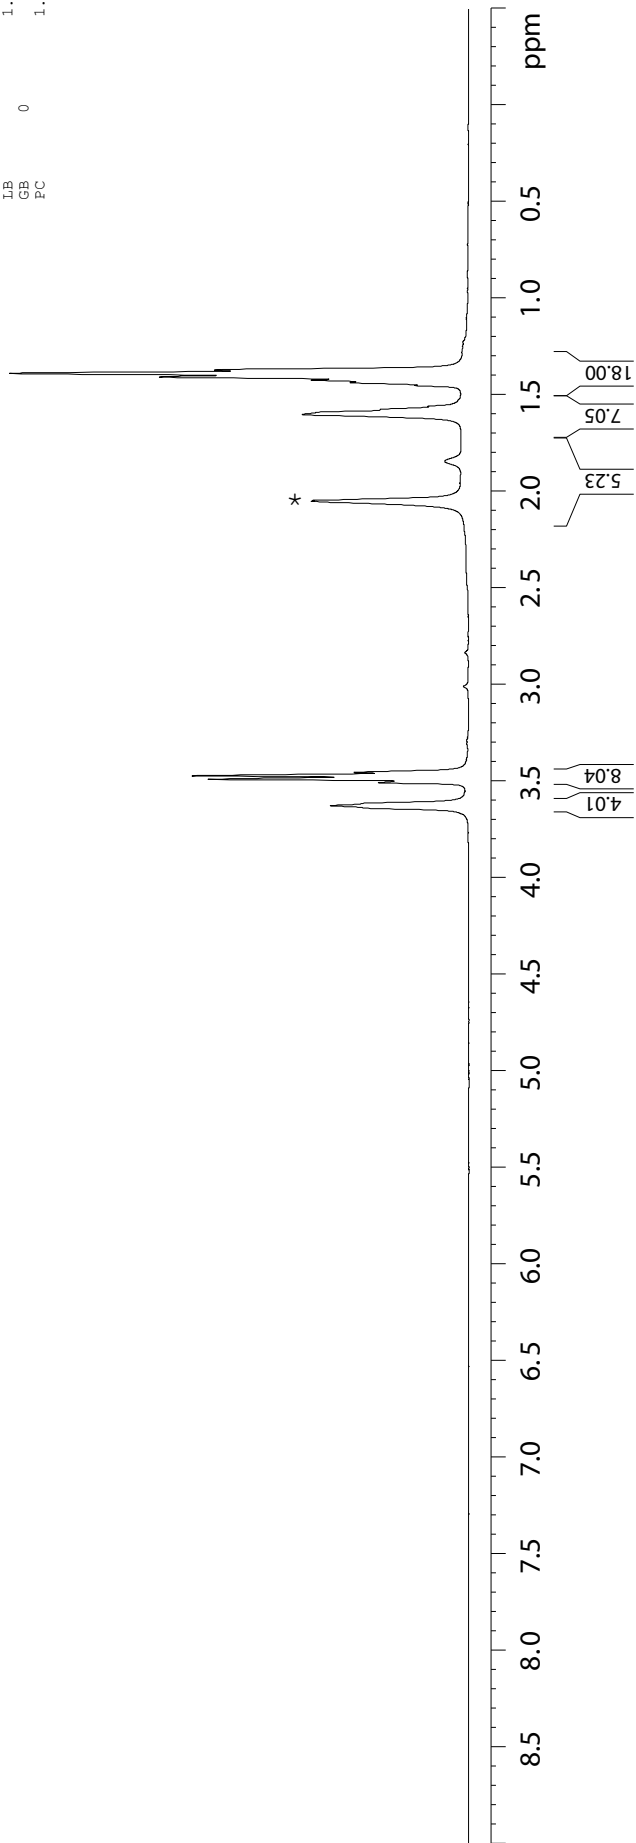

**[Et<sub>4</sub>N][CB11H<sub>11</sub>-CONPip], Ca. 30mg in acetone-d<sub>6</sub>  
11B, 128 MHz, T= 22 C**

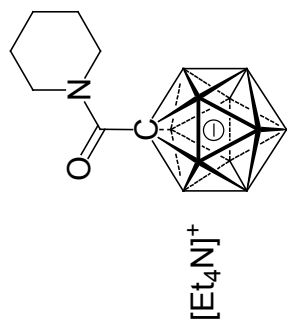

```

Current Data Parameters
NAME      20171214-ZHK-C5H11N
EXPNO    2
PROCNO   1

F2 - Acquisition Parameters
Date_    20171216
Time     22.47
INSTRUM  spect
PROBHD   5 mm PABBO BE/
PULPROG  zg
TD        65536
SOLVENT  Acetone
NS        128
DS        4
SWH       25510.203 Hz
FIDRES    0.389255 Hz
AQ        1.2845056 sec
RG        193.34
DW        19.600 usec
DE        6.50 usec
TE        295.5 K
D1        1.00000000 sec
TD0       1

===== CHANNEL f1 =====
NUC1      11B
P1        9.93 usec
PLW1     52.9659960 W
SFO1     128.3776052 MHz

F2 - Processing parameters
SI        32768
SF        128.3776050 MHz
WDW       EM
SSB       0
LB        1.00 Hz
GB        0
PC        1.40
  
```

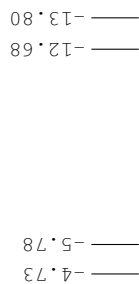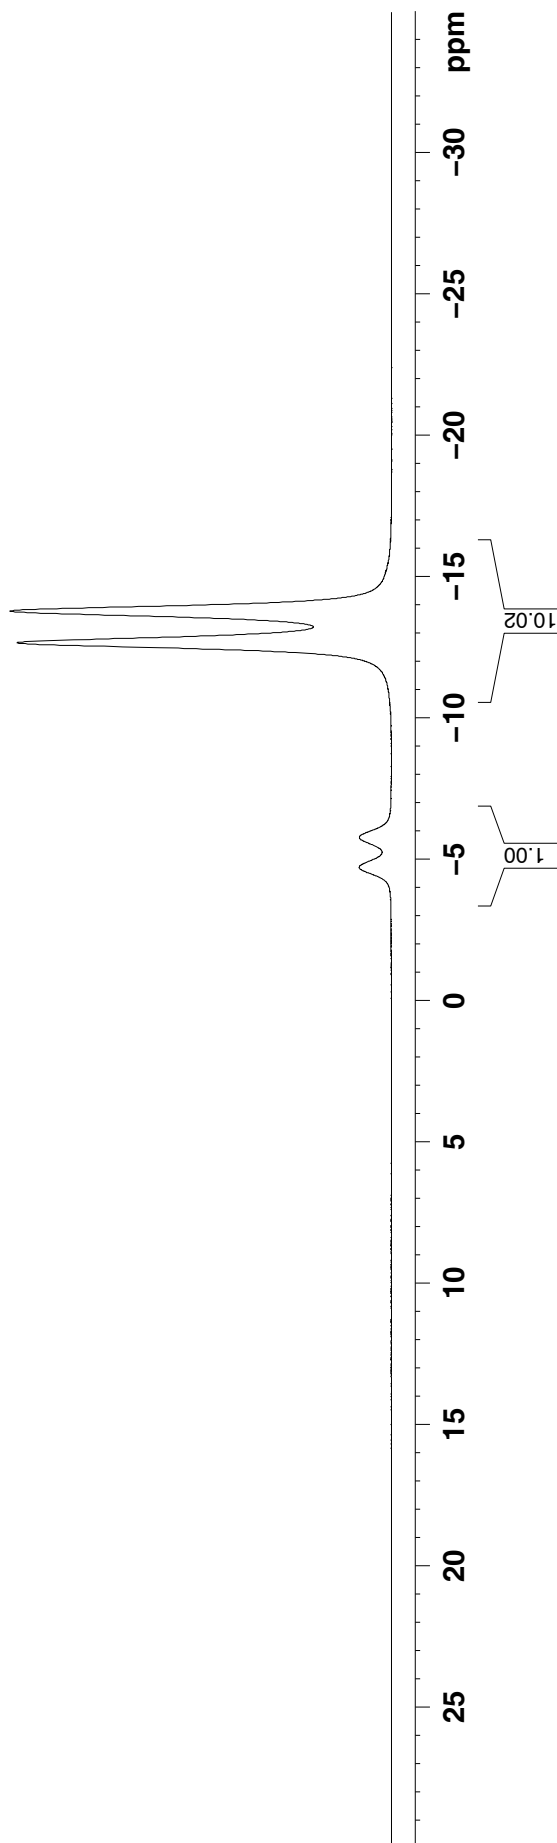

**[Et<sub>4</sub>N][CB11H<sub>11</sub>-CONPip], Ca. 30mg in acetone-d<sub>6</sub>  
11B{1H}, 128 MHz, T = 22 C**

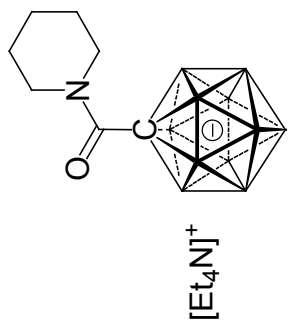

Current Data Parameters  
NAME 20171214-zhk-c5H11N  
EXPNO 3  
PROCNO 1

F2 - Acquisition Parameters  
Date\_ 20171216  
Time 22.54  
INSTRUM spect  
PROBHD 5 mm PABBO BB/  
PULPROG zgpg30  
TD 65536  
SOLVENT Acetone  
NS 128  
DS 4  
SWH 25510.203 Hz  
FIDRES 0.389255 Hz  
AQ 1.2845056 sec  
RG 193.34  
DW 19.600 usec  
DE 6.50 usec  
TE 296.2 K  
D1 1.00000000 sec  
D11 0.03000000 sec  
TDO 1

=====  
CHANNEL F1  
NUC1 11B  
P1 9.93 usec  
PLW1 52.96599560 W  
SF01 128.3776050 MHz

=====  
CHANNEL F2  
CPDPRG[2] waltz16  
NUC2 1H  
PCPD2 80.00 usec  
PLW2 12.50000000 W  
PLW12 0.43945000 W  
PLW13 0.28125000 W  
SF02 400.1320007 MHz

F2 - Processing Parameters  
SI 32768  
SF 128.3776050 MHz  
WDW EM  
SSB 0  
LB 1.00 Hz  
GB 0  
PC 1.40

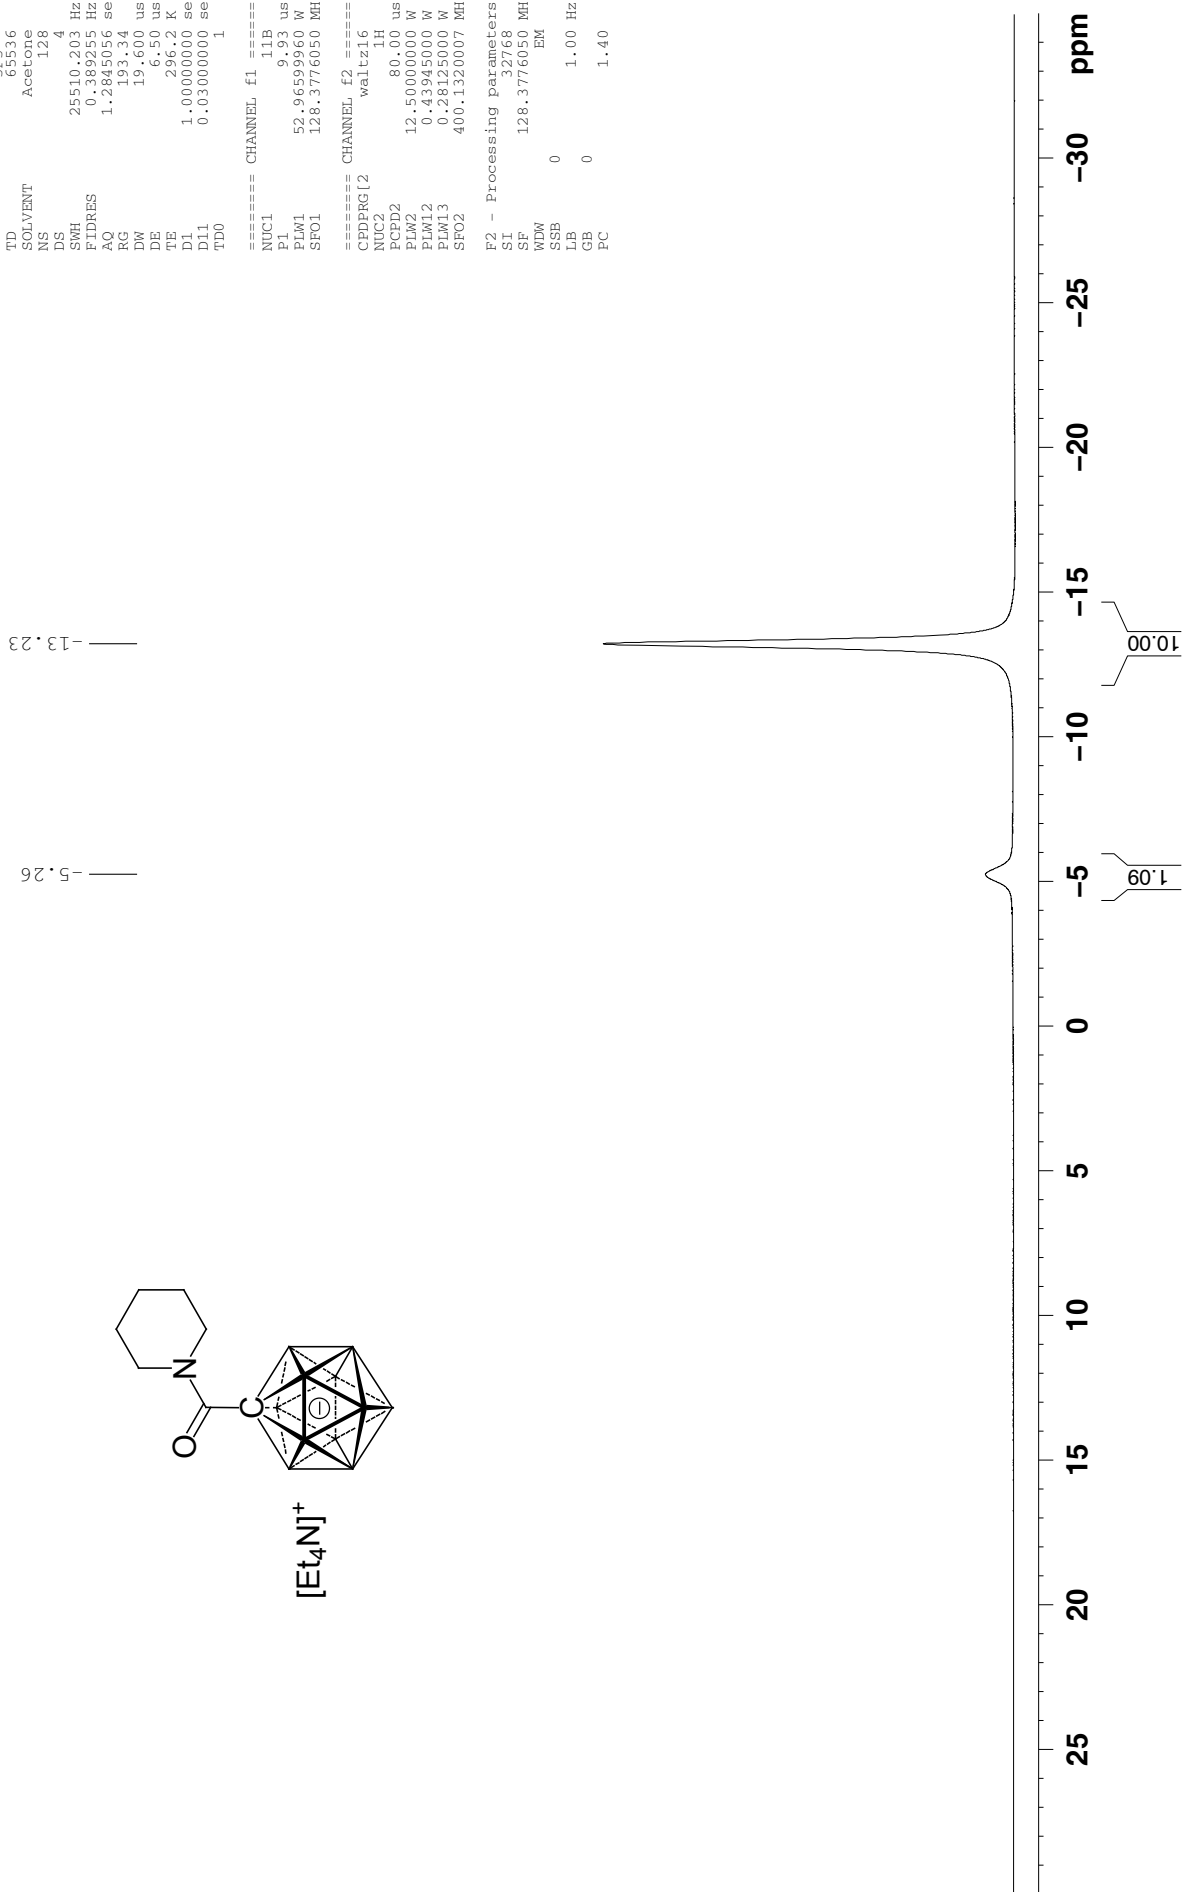

**[Et4N][CB11H11-CONPip], Ca. 30mg in acetone-d6  
13C{1H}, 100 MHz, T= 22 C**

Current Data Parameters  
 NAME 20171214-zhk-CSH11N  
 EXPNO 4  
 PROCNO 1  
 F2 - Acquisition Parameters  
 Date\_ 20171216  
 Time 23.40  
 INSTRUM spect  
 PROBHD 5 mm PABBO BB/  
 PULPROG zgpg30  
 TD 65536  
 SOLVENT Acetone  
 NS 1024  
 DS 4  
 SMH 29761.904 Hz  
 FIDRES 0.454131 Hz  
 AQ 1.1010048 sec  
 RG 193.34  
 DW 16.800 usec  
 DE 6.50 usec  
 TE 296.3 K  
 D1 1.50000000 sec  
 D11 0.03000000 sec  
 TDO 1

==== CHANNEL f1 =====  
 NUC1 13C  
 P1 10.00 usec  
 PLW1 53.0000000 W  
 SFO1 100.6228293 MHz  
 ===== CHANNEL f2 =====  
 CPDPRG2 waltz16  
 NUC2 1H  
 PCPD2 80.00 usec  
 PLW2 12.5000000 W  
 PLW3 0.43945000 W  
 PLW4 0.28125000 W  
 SFO2 400.1316005 MHz  
 F2 - Processing Parameters  
 SI 32768  
 SF 100.6126835 MHz  
 VDW EM  
 SSB 0  
 LB 3.00 Hz  
 GB 0  
 PC 1.40

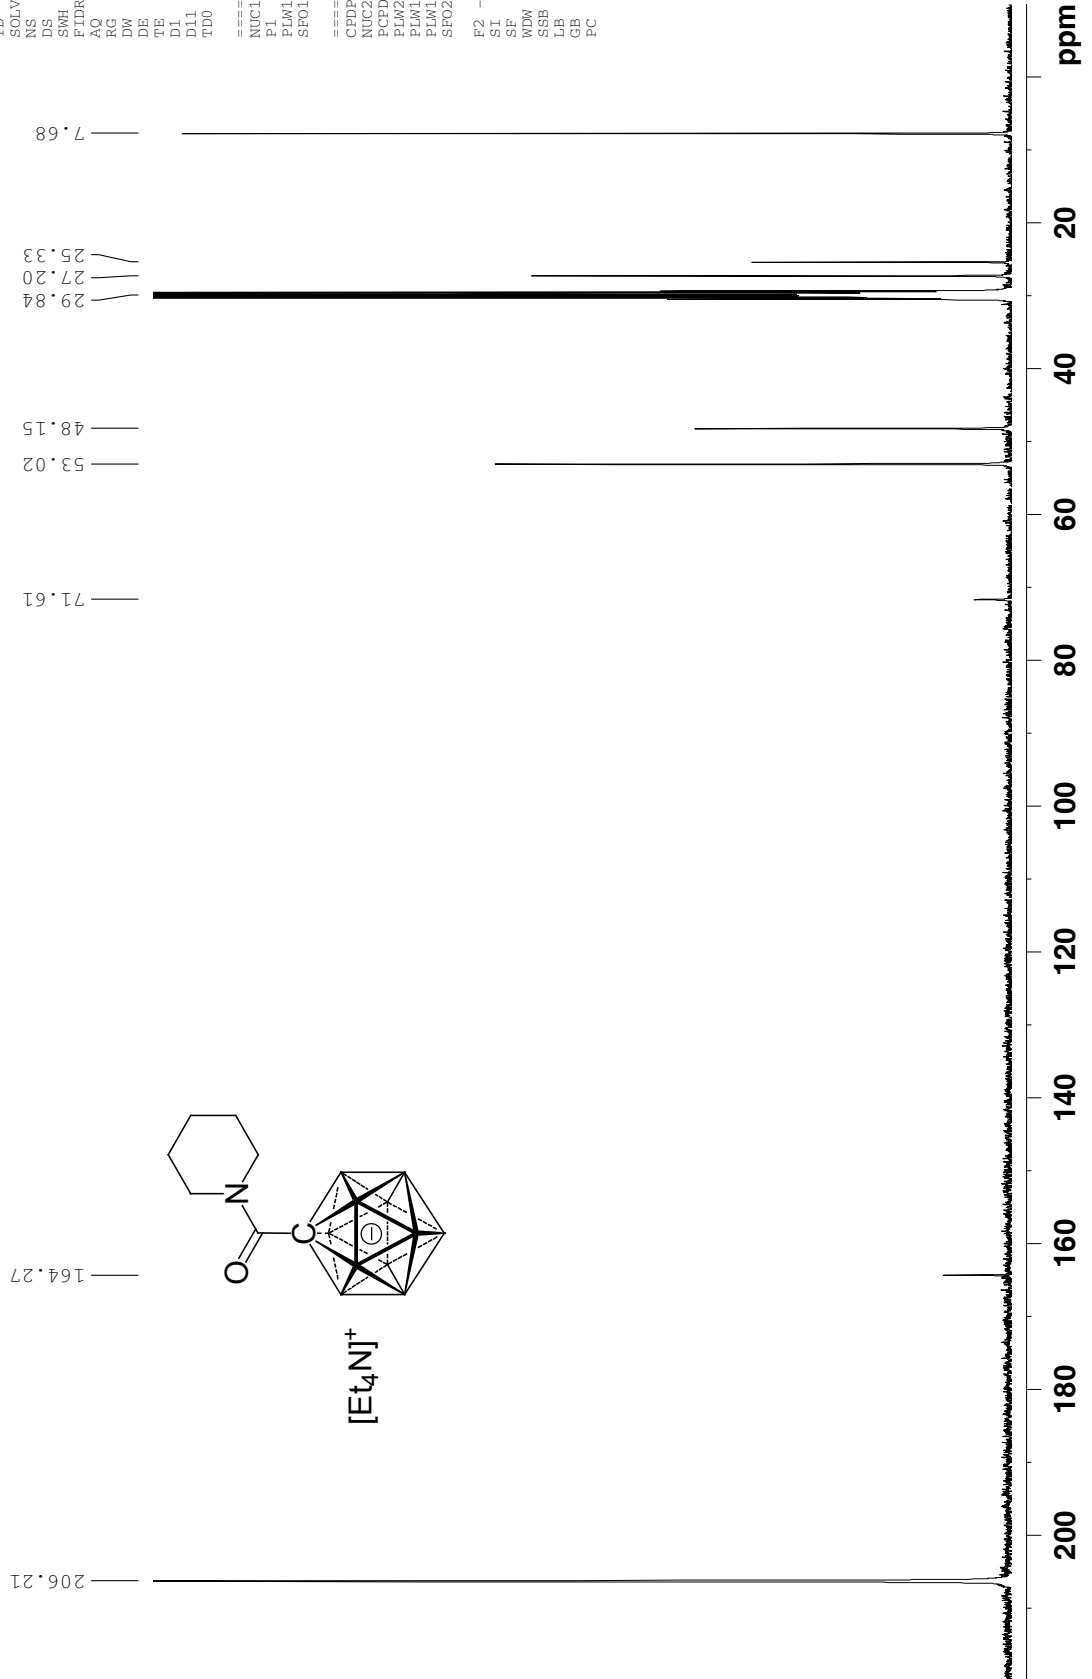



[Et4N][CB11H11-CONHC6H5], Ca. 30mg in acetone-d6 \*  
<sup>1</sup>H{<sup>1</sup>H}, 400 MHz, T = 22 °C

Current Data Parameters  
 NAME 2017-1220-zh-k-C6H5NH2  
 EXPNO 1  
 PROCNO 1

F2 - Acquisition Parameters  
 Date\_ 20171221  
 Time\_ 20.21  
 INSTRUM spect  
 PROBHD 5 mm PABBO BB/  
 PULPROG zgpg30  
 TD 16384  
 SOLVENT Acetone  
 DS 16  
 NS 4  
 SWH 8012.820 Hz  
 FIDRES 0.489064 Hz  
 AQ 1.0223616 sec  
 RG 64.43  
 DW 62.400 usec  
 DE 6.50 usec  
 TE 295.2 K  
 D1 1.00000000 sec  
 D11 0.03000000 sec  
 TD0 1

==== CHANNEL f1 =====  
 NUC1 <sup>1</sup>H  
 P1 15.00 usec  
 PL1 12.50000000 W  
 SFO1 400.1320007 MHz  
 =====  
 CHANNEL f2 =====  
 CPDPRG2 garr4  
 NUC2 <sup>13</sup>C  
 P2 90.00 usec  
 PL2 0.00000000 W  
 SFO2 125.7611550 MHz

F2 - Processing parameters  
 SI 32768  
 SF 400.1300030 MHz  
 WDM 0  
 SSB 0  
 LB 1.00 Hz  
 GB 0  
 FC 1.40

3.48  
3.46  
3.45  
3.43  
2.05  
2.04  
1.83  
1.69  
1.39  
1.39  
1.38  
1.38  
1.37  
1.36  
1.36  
1.36

8.13  
7.62  
7.60  
7.31  
7.29  
7.27  
7.07  
7.06  
7.04

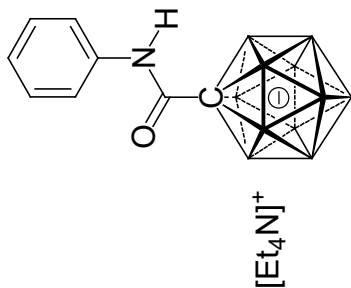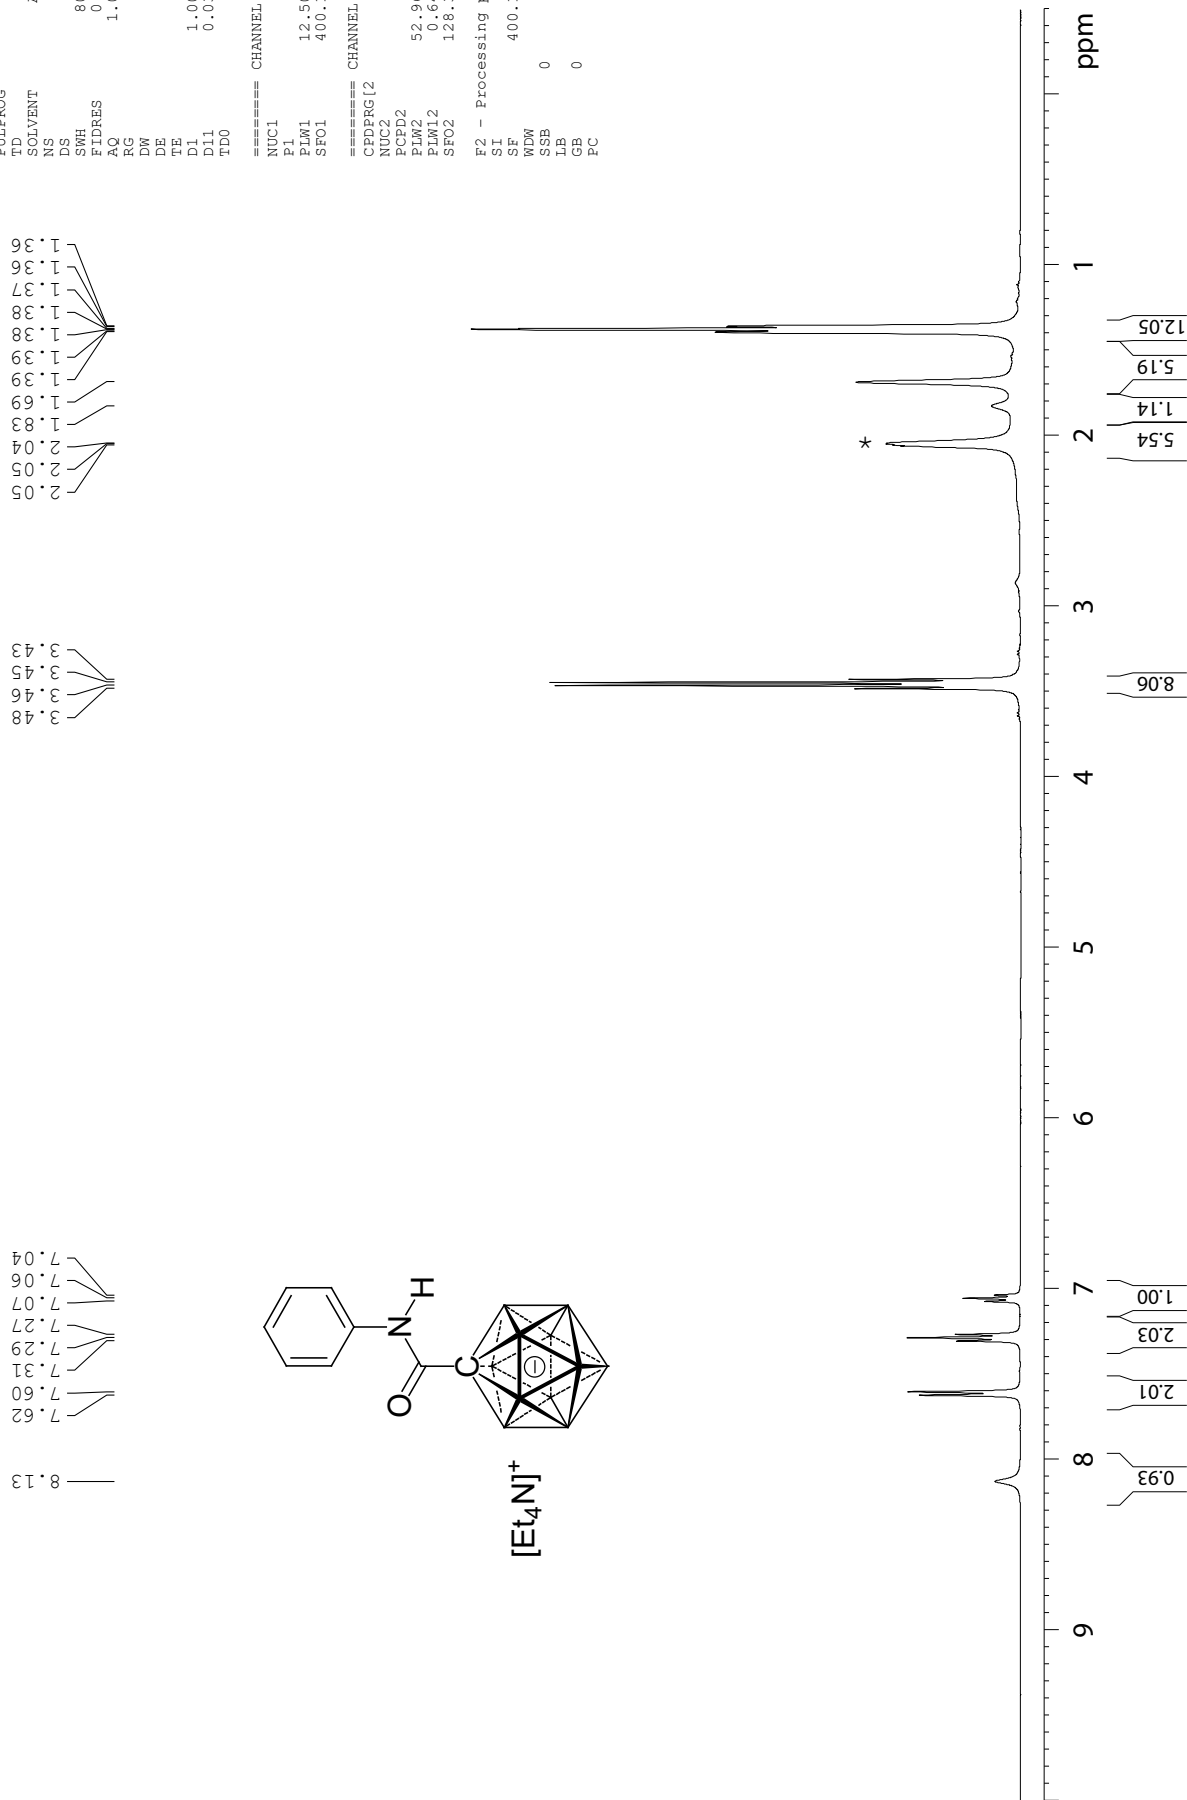

**[Et<sub>4</sub>N][CB11H11-CONHC6H5], Ca. 30mg in acetone-d<sub>6</sub>  
11B, 128 MHz, T= 22 C**

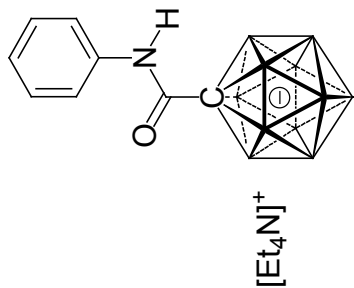

Current Data Parameters  
NAME 2017-1220-zhk-C6H5NH2  
EXPNO 3  
PROCNO 1

F2 - Acquisition Parameters  
Date\_ 20171221  
Time 20.33  
INSTRUM spect  
PROBHD 5 mm PABBO BB/  
PULPROG zg  
TD 65536  
SOLVENT Acetone  
NS 128  
DS 4  
SWH 25510.203 Hz  
FIDRES 0.389255 Hz  
AQ 1.2845056 sec  
RG 193.34  
DW 19.600 usec  
DE 6.50 usec  
TE 294.3 K  
D1 1.00000000 sec  
TD0 1

==== CHANNEL f1 =====  
NUC1 11B  
PI 9.93 usec  
PLW1 52.9659960 MHz  
SFO1 128.3776052 MHz

F2 - Processing parameters  
SI 32768  
SF 128.3776050 MHz  
WDW EM  
SSB 0  
LB 1.00 Hz  
GB 0  
FC 1.40

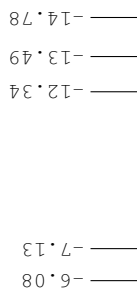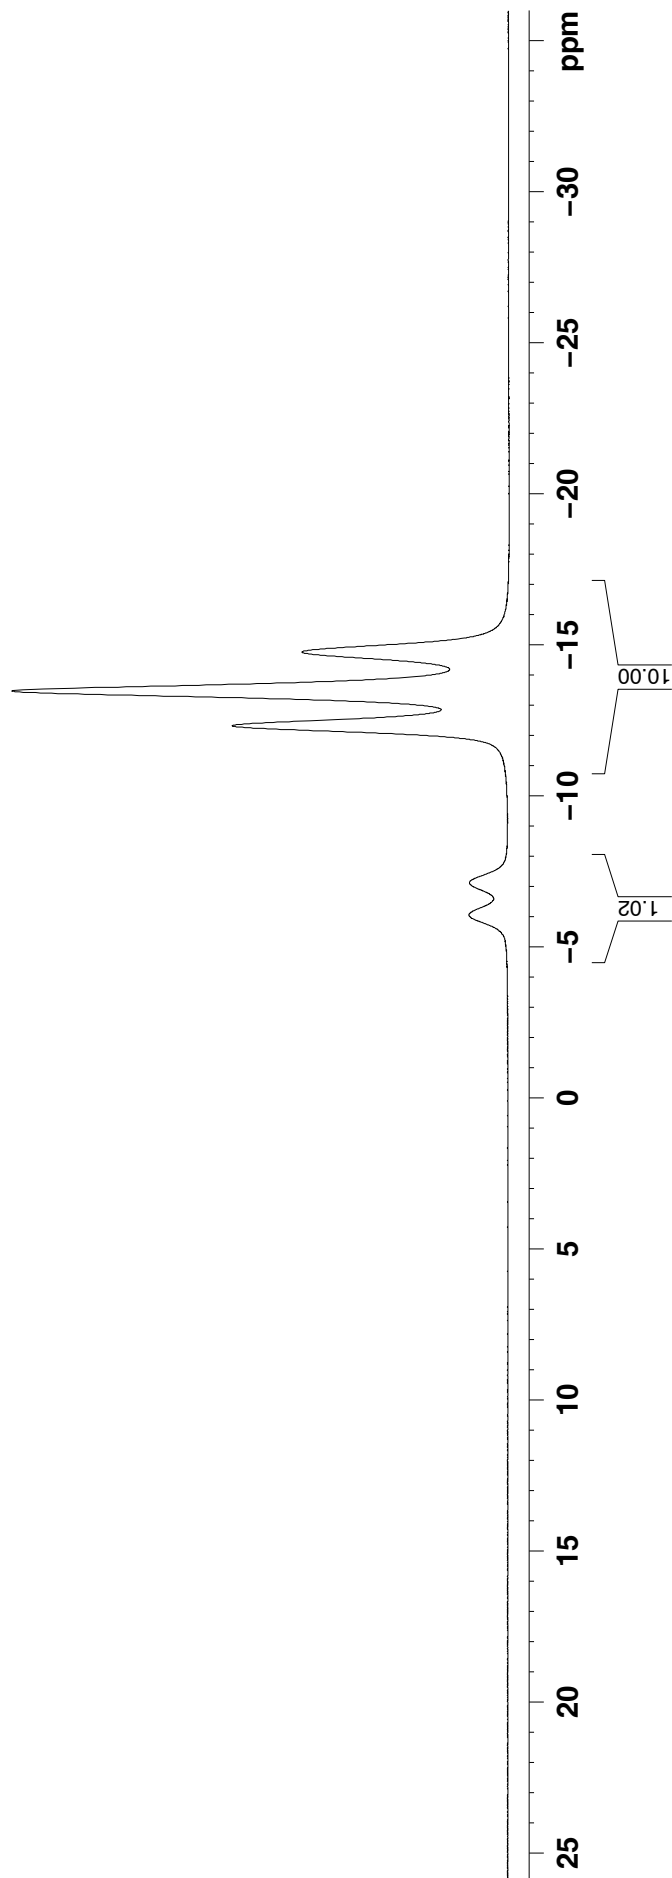

**[Et<sub>4</sub>N][CB11H<sub>11</sub>-CONHC<sub>6</sub>H<sub>5</sub>], Ca. 30mg in acetone-d<sub>6</sub>  
 11B{1H}, 128 MHz, T = 22 C**

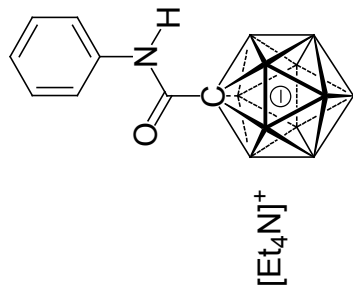

— 14.18  
 — 12.87  
 — 6.62

Current Data Parameters  
 NAME 2017-1220-zhk-C6H5NH2  
 EXPNO 2  
 PROCNO 1

F2 - Acquisition Parameters  
 Date\_ 20171221  
 Time 20.28  
 INSTRUM spect  
 PROBHD 5 mm PARBO BB/  
 PULPROG zgpg30  
 TD 65536  
 SOLVENT Acetone  
 NS 128  
 DS 4  
 SWH 25510.203 Hz  
 FIDRES 0.389255 Hz  
 AQ 1.2845056 sec  
 RG 193.34  
 DW 19.600 usec  
 DE 6.50 usec  
 TE 295.3 K  
 D1 1.00000000 sec  
 D11 0.03000000 sec  
 TD0 1

==== CHANNEL f1 =====  
 NUC1 11B  
 P1 9.93 usec  
 PLW1 52.9659960 W  
 SFO1 128.3776050 MHz

==== CHANNEL f2 =====  
 CPDPRG[2] waltz16  
 NUC2 1H  
 PCPD2 80.00 usec  
 PLW2 12.50000000 W  
 PLM2 0.43945000 W  
 PLM3 0.28135000 W  
 SFO2 400.1320007 MHz

F2 - Processing parameters  
 SI 32768  
 SF 128.3776050 MHz  
 WDM 0  
 SSB 0  
 LB 1.00 Hz  
 GB 0  
 FC 1.40

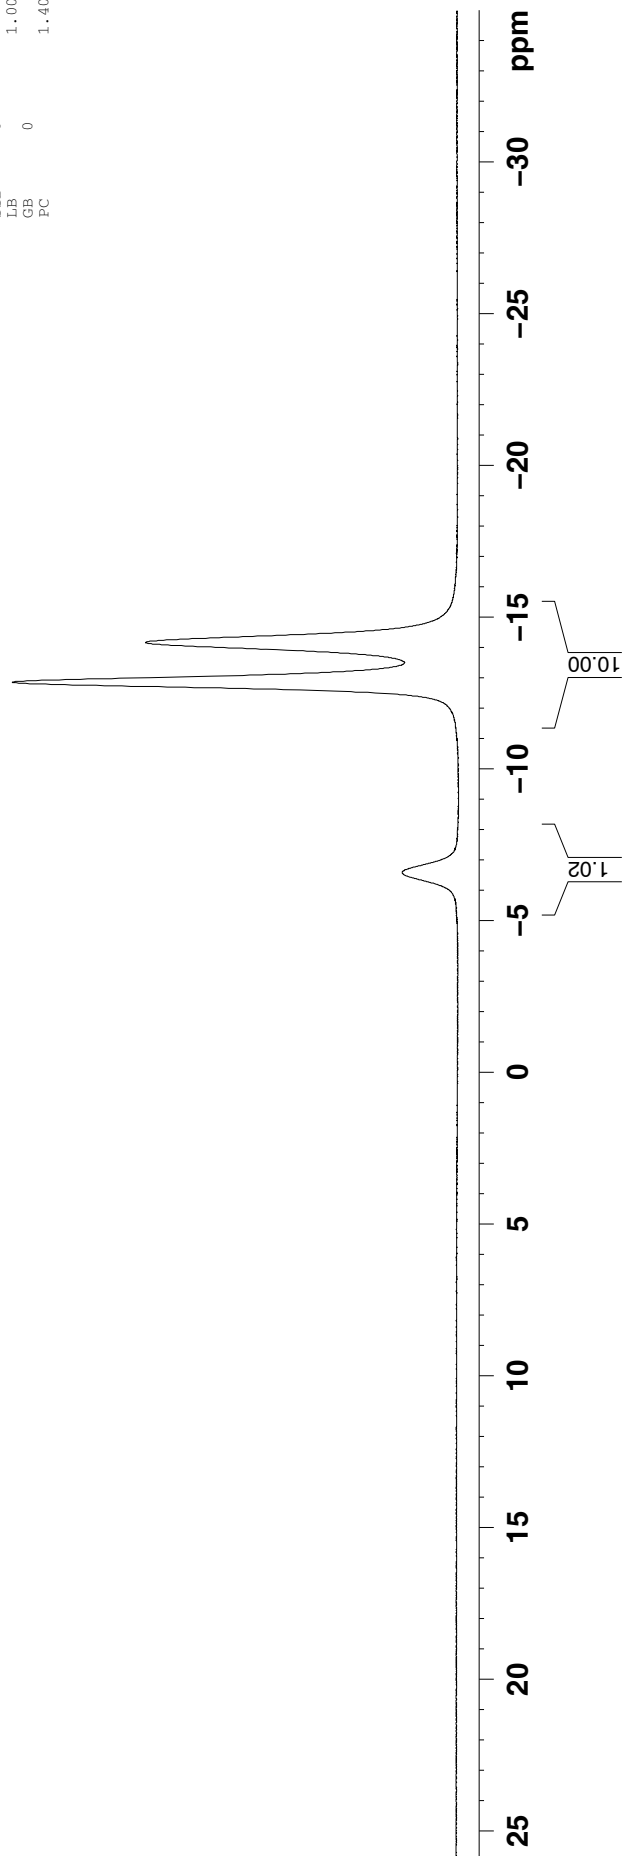

**[Et<sub>4</sub>N][CB11H<sub>11</sub>-CONHC<sub>6</sub>H<sub>5</sub>], Ca. 30mg in acetone-d<sub>6</sub>  
<sup>13</sup>C{<sup>1</sup>H}, 100 MHz, T= 22 C**

Current Data Parameters  
 NAME 2017-1220-zhk-c6h5nh2  
 EXPNO 4  
 PROCNO 1

F2 - Acquisition Parameters  
 Date\_ 20171221  
 Time 21.20  
 INSTRUM spect  
 PROBHD 5 mm PABBO BB/  
 PULPROG zgpg30  
 TD 65536  
 SOLVENT Acetone  
 NS 1024  
 DS 4  
 SWH 29761.904 Hz  
 FIDRES 0.454131 Hz  
 AQ 1.1010048 sec  
 RG 193.34  
 DW 16.800 usec  
 DE 6.50 usec  
 TE 295.3 K  
 D1 1.50000000 sec  
 D11 0.03000000 sec  
 TD0 1

=====  
 CHANNEL f1  
 NUC1 <sup>13</sup>C  
 P1 10.00 usec  
 PLW1 53.00000000 W  
 SFO1 100.6228293 MHz

=====  
 CHANNEL f2  
 CPDPRG2 waltz16  
 NUC2 <sup>1</sup>H  
 PCPD2 80.00 usec  
 PLW2 12.50000000 W  
 PLM2 0.43945000 W  
 PLM3 0.28125000 W  
 SFO2 400.1316005 MHz

F2 - Processing parameters  
 SI 32768  
 SF 100.6126866 MHz  
 MDW 0  
 SSB 0  
 LB 0  
 GB 0  
 PC 1.40

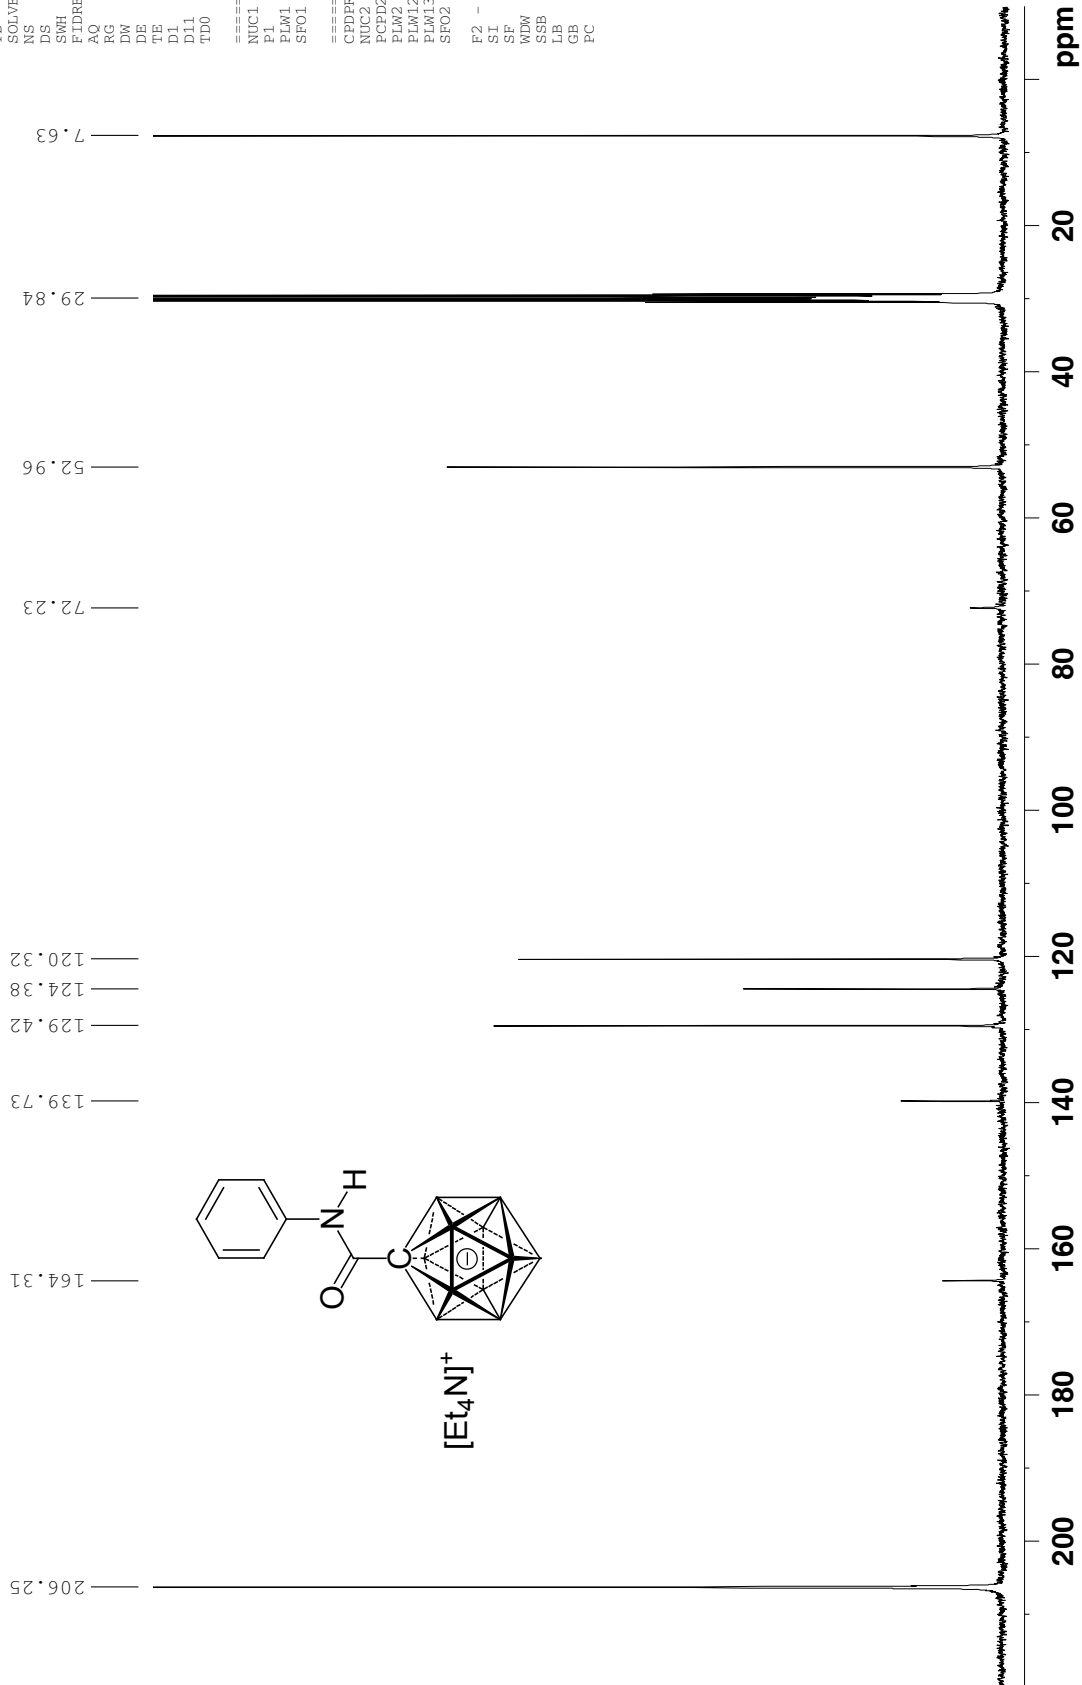

**[Et<sub>4</sub>N][CB11H11-CONHC6H4F], Ca. 30mg in acetone-d<sub>6</sub> \***  
**<sup>1</sup>H{<sup>11</sup>B}, 500 MHz, T= 22 C**

Current Data Parameters  
 NAME 1062-FB  
 EXPNO 1  
 PROCNO 1

F2 - Acquisition Parameters  
 Date\_ 20180201  
 Time\_ 12.33  
 INSTRUM spect  
 PROBHD 5 mm PABBO BB-  
 PULPROG zgpg30  
 TD 65536  
 SOLVENT Acetone  
 NS 16  
 DS 0  
 SWH 12500.000 Hz  
 FIDRES 0.190735 Hz  
 AQ 2.6214399 sec  
 RG 64  
 DM 40.000 usec  
 DE 6.50 usec  
 TE 295.7 K  
 D1 5.00000000 sec  
 D11 0.03000000 sec

==== CHANNEL f1 =====  
 NUC1 <sup>1</sup>H  
 P1 11.70 usec  
 PL1 19.0000000 W  
 SF01 500.1355009 MHz

==== CHANNEL f2 =====  
 CPDPRG2 garrp  
 NUC2 <sup>11</sup>B  
 P2 100.10 usec  
 PL2 95.0000000 W  
 SF02 1.63030005 MHz  
 SFO2 160.4615690 MHz

F2 - Processing parameters  
 SI 32768  
 SF 500.1300102 MHz  
 EM  
 ADW 0  
 SSB 0  
 LB 1.00 Hz  
 GB 0  
 FC 1.00

3.45  
3.46  
3.48  
3.49

2.05  
2.02  
1.81  
1.67  
1.39  
1.38  
1.37

8.18  
7.65  
7.64  
7.64  
7.64  
7.63

7.06  
7.04  
7.02

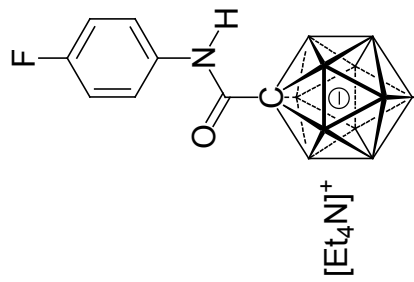

\*

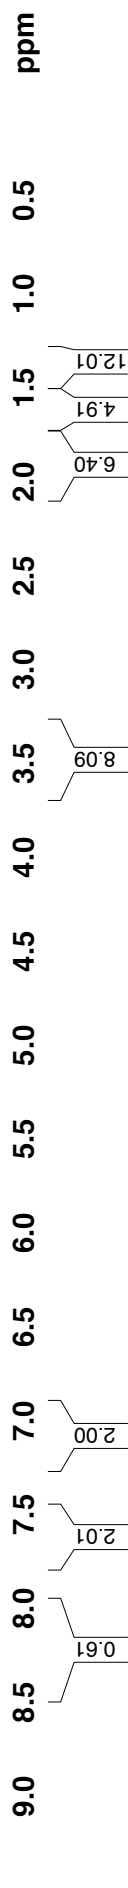

**[Et<sub>4</sub>N][CB11H11-CONHC6H4F], Ca. 30mg in acetone-d<sub>6</sub>  
11B, 160 MHz, T= 22 C**

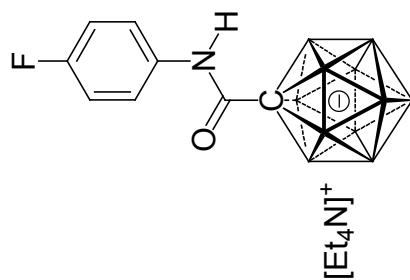

```

Current Data Parameters
NAME      1062-FB
EXPNO    2
PROCNO   1

F2 - Acquisition Parameters
Date_    20180201
Time     12.35
INSTRUM spect
PROBHD   5 mm PABBO BB-
PULPROG zg30
TD       64098
SOLVENT  Acetone
NS       32
DS       0
SMH      32051.281 Hz
FIDRES   0.500036 Hz
AQ        0.9999288 sec
RG        203
DM        15.600 usec
DE        6.50 usec
TE        295.4 K
D1        1.00000000 sec

===== CHANNEL f1 =====
NUC1      11B
P1        13.10 usec
PL1       95.00000000 W
SFO1      160.4615792 MHz

F2 - Processing Parameters
SI        32768
SF        160.4615790 MHz
WDW       EM
SSB       0
LB        0
GB        0
PC        1.40
    
```

-6.14  
 -6.99  
 -12.45  
 -13.36  
 -14.67

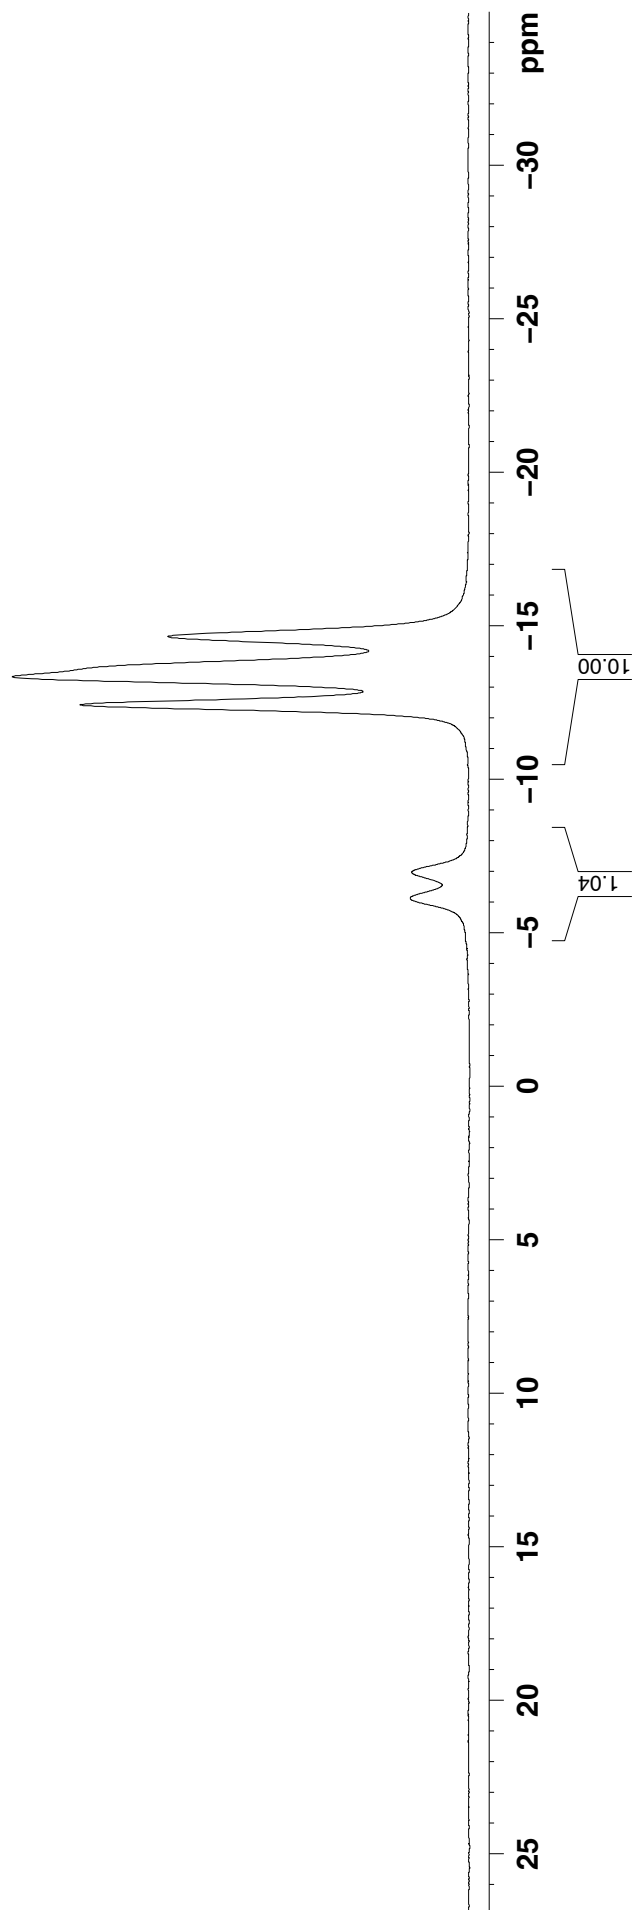

[Et4N][CB11H11-CONHC6H4F], Ca. 30mg in acetone-d6  
11B{1H}, 160 MHz, T= 22 C

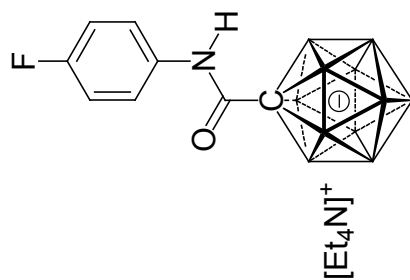

Current Data Parameters  
NAME 1062-FB  
EXPNO 3  
PROCNO 1

F2 - Acquisition Parameters  
Date\_ 20180201  
Time 12.37  
INSTRUM spect  
PROBHD 5 mm PABBO BB-  
PULPROG zgpg30  
TD 65536  
SOLVENT Acetone  
NS 32  
DS 0  
SMH 32051.281 Hz  
FIDRES 0.489064 Hz  
AQ 1.0223616 sec  
RG 203  
DM 15.600 usec  
DE 6.50 usec  
TE 295.6 K  
D1 1.00000000 sec  
D11 0.03000000 sec

==== CHANNEL f1 =====  
NUC1 11B  
P1 13.10 usec  
PL1 95.00000000 W  
SFO1 160.4615790 MHz

==== CHANNEL f2 =====  
CPDPRG2 waltz16  
NUC2 1H  
PCPD2 80.00 usec  
PLM2 19.00000000 W  
PLM1 0.40639001 W  
PLM3 0.26008999 W  
SFO2 500.1325007 MHz

F2 - Processing parameters  
SI 32768  
SF 160.4615790 MHz  
WDW EM  
SSB 0  
LB 1.00 Hz  
GB 0  
FC 1.40

12.87  
14.20  
6.54

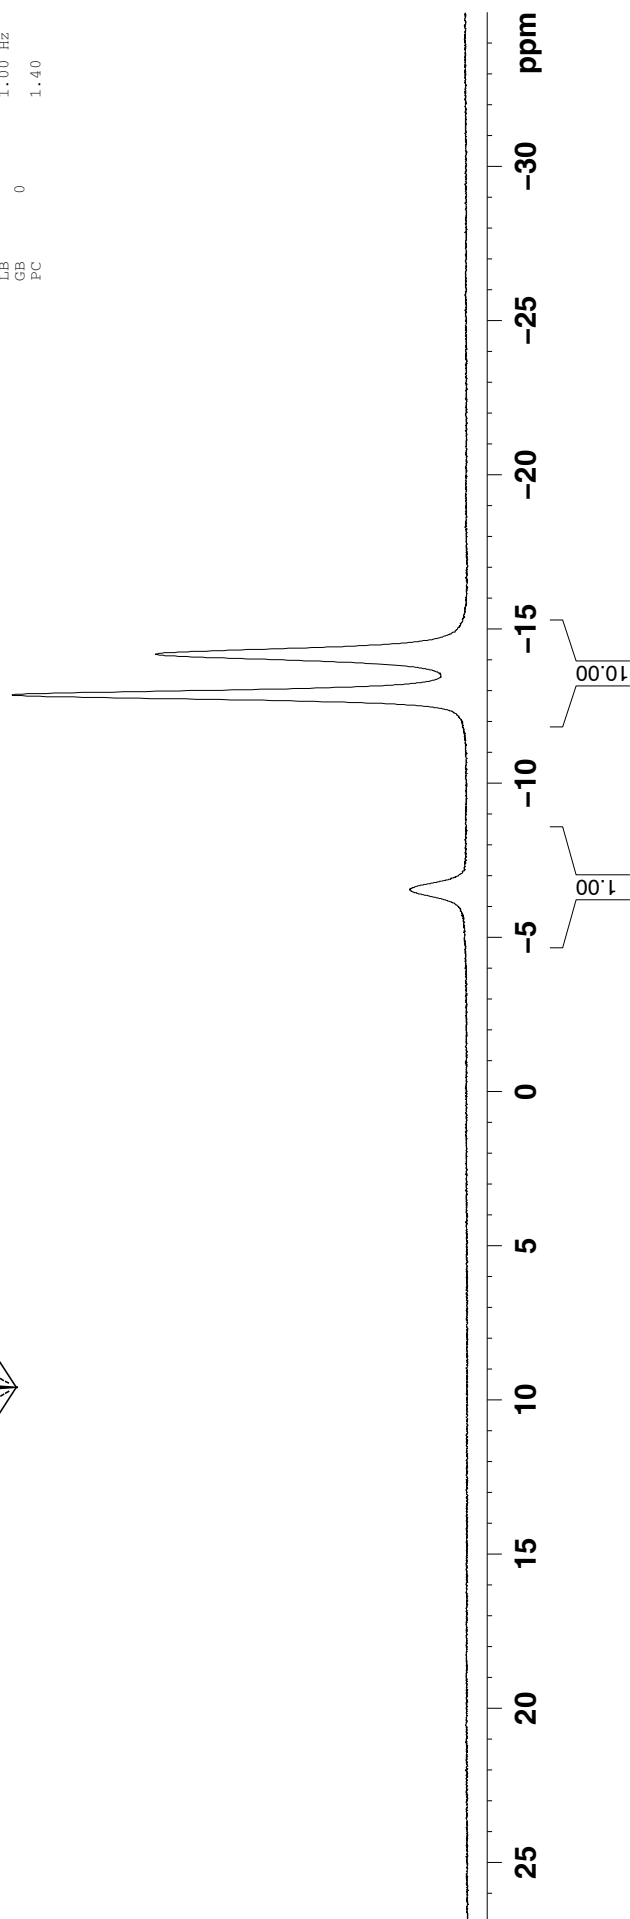

**[Et4N][CB11H11-CONHC6H4F], Ca. 30mg in acetone-d6  
13C{1H}, 125 MHz, T= 22 C**

```

Current Data Parameters
NAME      1062-FB
EXPNO    4
PROCNO   1

F2 - Acquisition Parameters
Date_    20180201
Time     13.20
INSTRUM spect
PROBHD   5 mm PABBO BB-
PULPROG zgpg30
TD       65536
SOLVENT  Acetone
NS       1024
DS       4
SWH      37878.789 Hz
FIDRES   0.577984 Hz
AQ       0.8650752 sec
RG       203
DW       13.200 usec
DE       6.50 usec
TE       296.4 K
D1       1.5000000 sec
D11      0.0300000 sec

===== CHANNEL f1 =====
NUC1     13C
P1       10.50 usec
PLW1    95.0000000 W
SFO1    125.716224 MHz

===== CHANNEL f2 =====
CPDPRG2  waltz16
NUC2     1H
PCPD2   80.00 usec
PLW2    19.0000000 W
PLW12   0.40639001 W
PLW13   0.26008999 W
SFO2    500.1320005 MHz

F2 - Processing parameters
SI       32768
SF       125.7576822 MHz
WDW      EM
SSB      0
LB       3.00 Hz
GB       0
PC       1.40
    
```

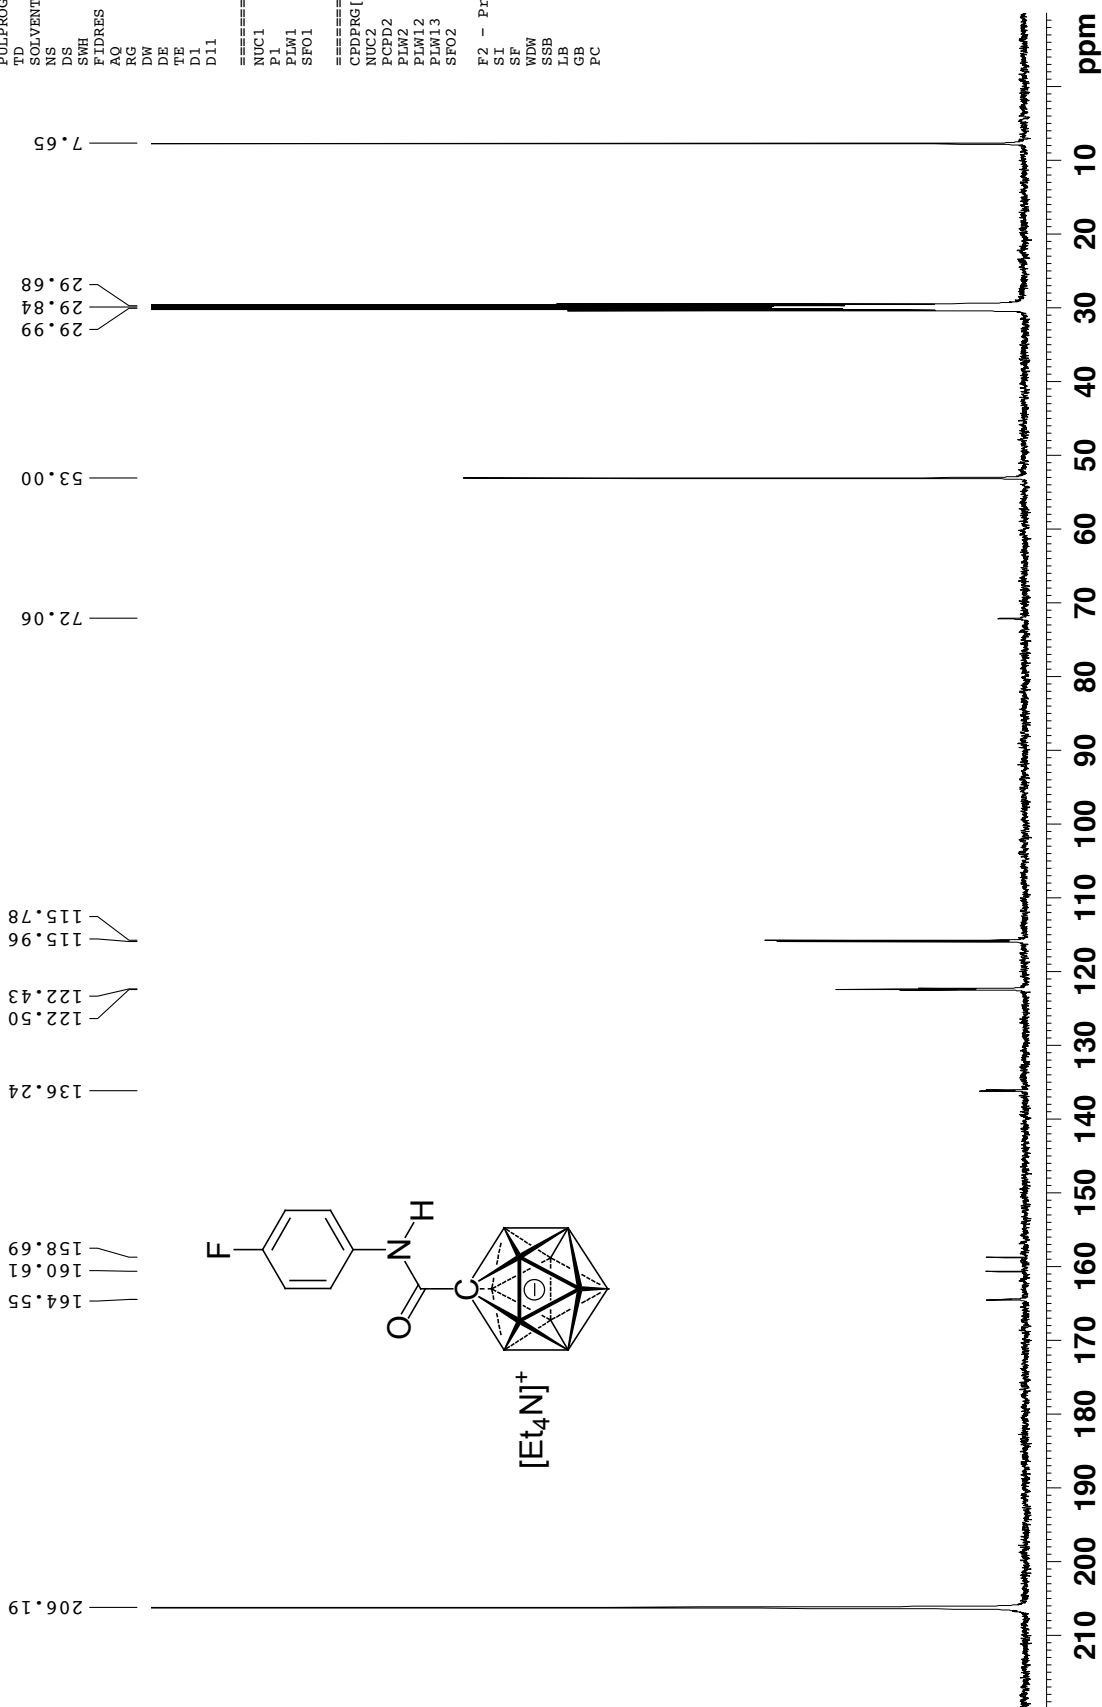



**[Et<sub>4</sub>N][CB11H<sub>11</sub>-CONHC<sub>6</sub>H<sub>4</sub>I], Ca. 30mg in acetonitrile-d<sub>3</sub> \***

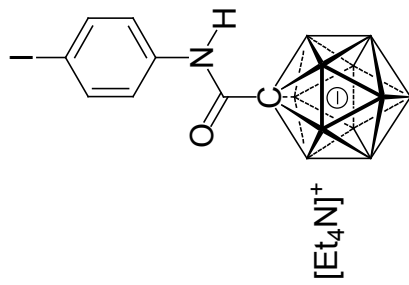

7.97  
7.58  
7.30  
7.28

3.15  
3.13  
3.11  
3.09

2.20  
1.95  
1.94  
1.94  
1.93  
1.92  
1.92  
1.96  
1.20  
1.19  
1.19  
1.16  
1.16  
1.15

Current Data Parameters  
 NAME 20171227-zhk-IC6H4NH2  
 EXPNO 1  
 PROCNO 1

F2 - Acquisition Parameters  
 Date\_ 20171230  
 Time 16.42  
 INSTRUM spect  
 PROBHD 5 mm FAPBO BB/  
 PULPROG zgpg30  
 ID 16384  
 SOLVENT CD3CN  
 NS 16  
 DS 4  
 SWH 8012.820 Hz  
 FIDRES 0.489064 Hz  
 AQ 1.0223616 sec  
 RG 71.39  
 DW 62.400 usec  
 DE 6.50 usec  
 TE 294.7 K  
 D1 1.0000000 sec  
 D11 0.0300000 sec  
 TDO 1

==== CHANNEL f1 =====  
 NUC1 1H  
 P1 15.00 usec  
 PLW1 12.5000000 W  
 SFO1 400.1320007 MHz

==== CHANNEL f2 =====  
 CPDPRG2 garp4  
 NUC2 11B  
 P2 90.00 usec  
 PLW2 52.9659960 W  
 PLW1 0.6447798 W  
 SFO2 128.3776050 MHz

F2 - Processing parameters  
 SI 32768  
 SF 400.1300179 MHz  
 WDW EM  
 SSB 0  
 LB 1.00 Hz  
 GB 0  
 FC 1.40

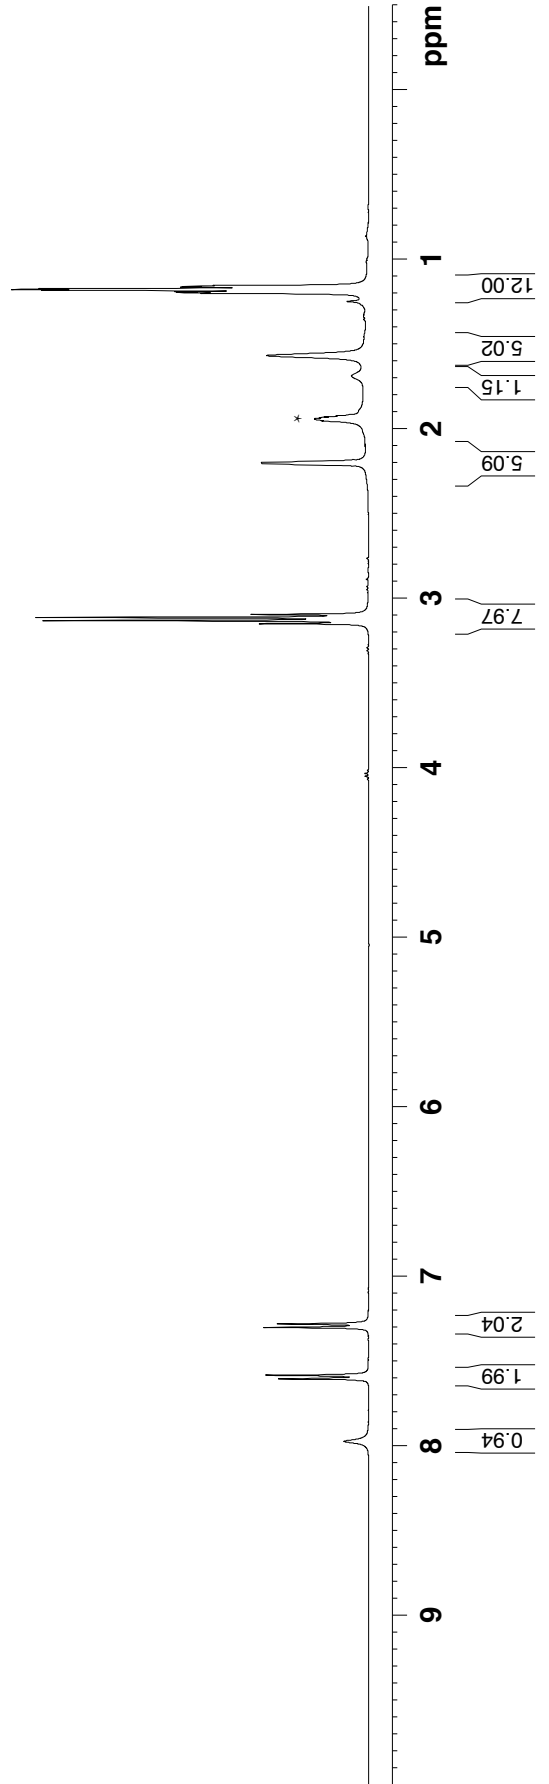

**[Et<sub>4</sub>N][CB11H<sub>11</sub>-CONHC<sub>6</sub>H<sub>4</sub>I], Ca. 30mg in acetonitrile-d<sub>3</sub>  
11B, 128 MHz, T= 22 C**

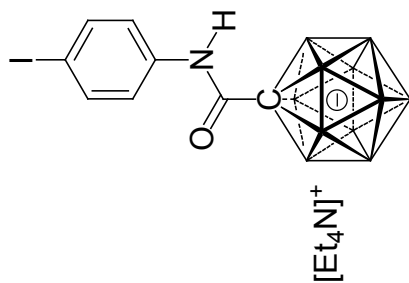

Current Data Parameters  
 NAME 20171227-zhk-IC6H4IH2  
 EXPNO 3  
 PROCNO 1

F2 - Acquisition Parameters  
 Date\_ 20171230  
 Time 16:54  
 INSTRUM spect  
 PROBHD 5 mm PABBO BB/  
 PULPROG zg  
 TD 65536  
 CD3CN 128  
 NS 4  
 DS 4  
 SWH 25510.203 Hz  
 FIDRES 0.389255 Hz  
 AQ 1.2845056 sec  
 RG 193.34  
 DW 19.600 usec  
 DE 6.50 usec  
 TE 294.5 K  
 D1 1.00000000 sec  
 TD0 1

==== CHANNEL f1 =====  
 NUC1 11B  
 P1 9.93 usec  
 PLW1 52.9659960 W  
 SFO1 128.3776052 MHz

F2 - Processing parameters  
 SI 32768  
 SF 128.3776050 MHz  
 MDW EM  
 SSB 0  
 LB 1.00 Hz  
 GB 0  
 FC 1.40

14.82  
 13.56  
 12.43  
 7.18  
 6.13

NMR50

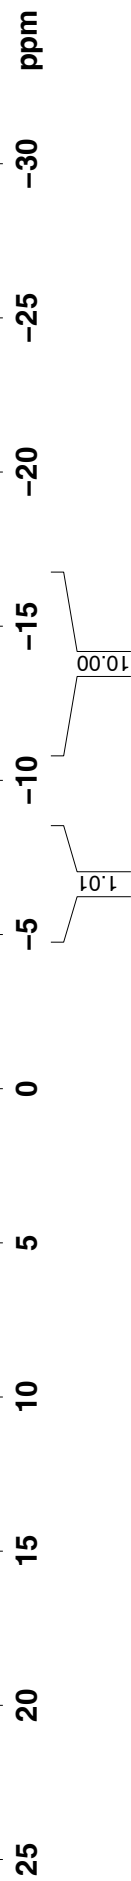

**[Et<sub>4</sub>N][CB11H<sub>11</sub>-CONHC<sub>6</sub>H<sub>4</sub>I], Ca. 30mg in acetonitrile-d<sub>3</sub>  
11B{1H}, 128 MHz, T= 22 C**

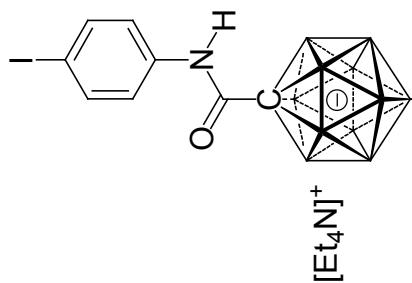

Current Data Parameters  
 NAME 20171227-zhk-1C6H4NH2  
 EXPNO 2  
 PROCNO 1

F2 - Acquisition Parameters  
 Date\_ 20171230  
 Time 16.48  
 INSTRUM spect  
 PROBHD 5 mm PARBO BB/  
 PULPROG zgpg30  
 TD 6536  
 SOLVENT CD3CN  
 NS 128  
 DS 4  
 SWH 25510.203 Hz  
 FIDRES 0.389255 Hz  
 AQ 1.2845056 sec  
 RG 193.34  
 DW 19.600 usec  
 DE 6.50 usec  
 TE 295.2 K  
 D1 1.00000000 sec  
 D11 0.03000000 sec  
 TD0 1

==== CHANNEL f1 =====  
 NUC1 11B  
 P1 9.93 usec  
 PLW1 52.9659960 W  
 SFO1 128.3776050 MHz

==== CHANNEL f2 =====  
 CPDPRG2 waltz16  
 NUC2 1H  
 P2 80.00 usec  
 PLW2 12.50000000 W  
 PLM2 0.43945000 W  
 PLM3 0.28135000 W  
 SFO2 400.1320007 MHz

F2 - Processing parameters  
 SI 32768  
 SF 128.3776050 MHz  
 EQ  
 WDM 0  
 LB 1.00 Hz  
 GB 0  
 FC 1.40

6.69  
 12.97  
 14.21

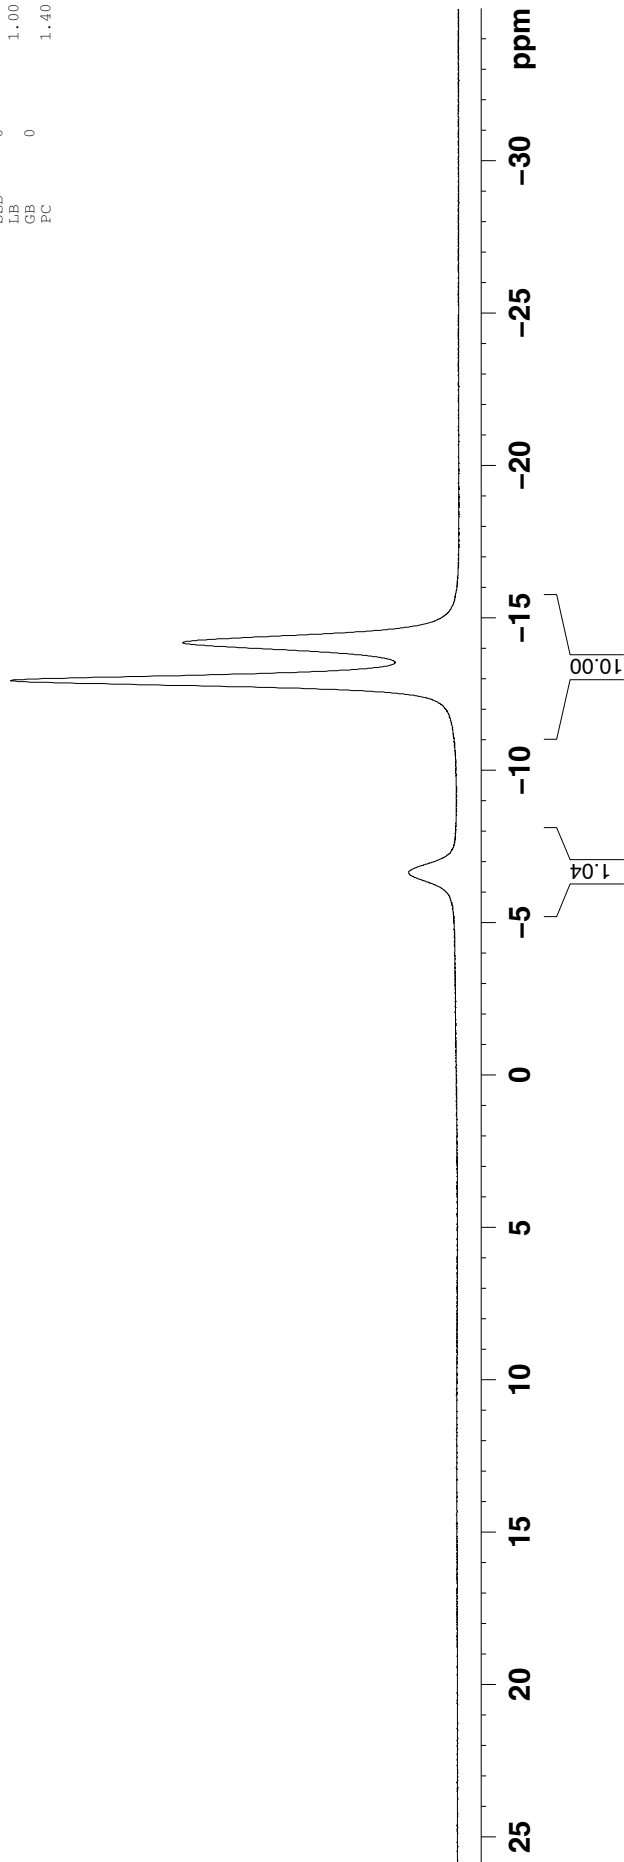

**[Et4N][CB11H11-CONHC6H4I], Ca. 30mg in acetonitrile-d3  
13C{1H}, 100 MHz, T= 22 C**

Current Data Parameters  
 NAME 20171227-zhk-1c6h4nh2  
 EXPNO 4  
 PROCNO 1

F2 - Acquisition Parameters  
 Date\_ 20171230  
 Time 17.41  
 INSTRUM spect  
 PROBHD 5 mm PABBO BB/  
 PULPROG zgpg30  
 TD 65536  
 SOLVENT CD3CN  
 NS 1024  
 DS 4  
 SWH 29761.904 Hz  
 FIDRES 0.454131 Hz  
 AQ 1.1010048 sec  
 RG 193.34  
 DW 16.800 usec  
 DE 6.50 usec  
 TE 295.4 K  
 D1 1.50000000 sec  
 D11 0.03000000 sec  
 TD0 1

==== CHANNEL f1 =====  
 NUC1 13C  
 P1 10.00 usec  
 PLW1 53.00000000 W  
 SFO1 100.6228293 MHz

==== CHANNEL f2 =====  
 CPDPRG2 waltz16  
 NUC2 1H  
 PCPD2 80.00 usec  
 PLW2 12.50000000 W  
 PLW12 0.43945000 W  
 PLW13 0.28125000 W  
 SFO2 400.1316005 MHz

F2 - Processing parameters  
 SI 32768  
 SF 100.6126793 MHz  
 NDM 0  
 SSB 0  
 LB 0  
 GB 0  
 PC 1.40

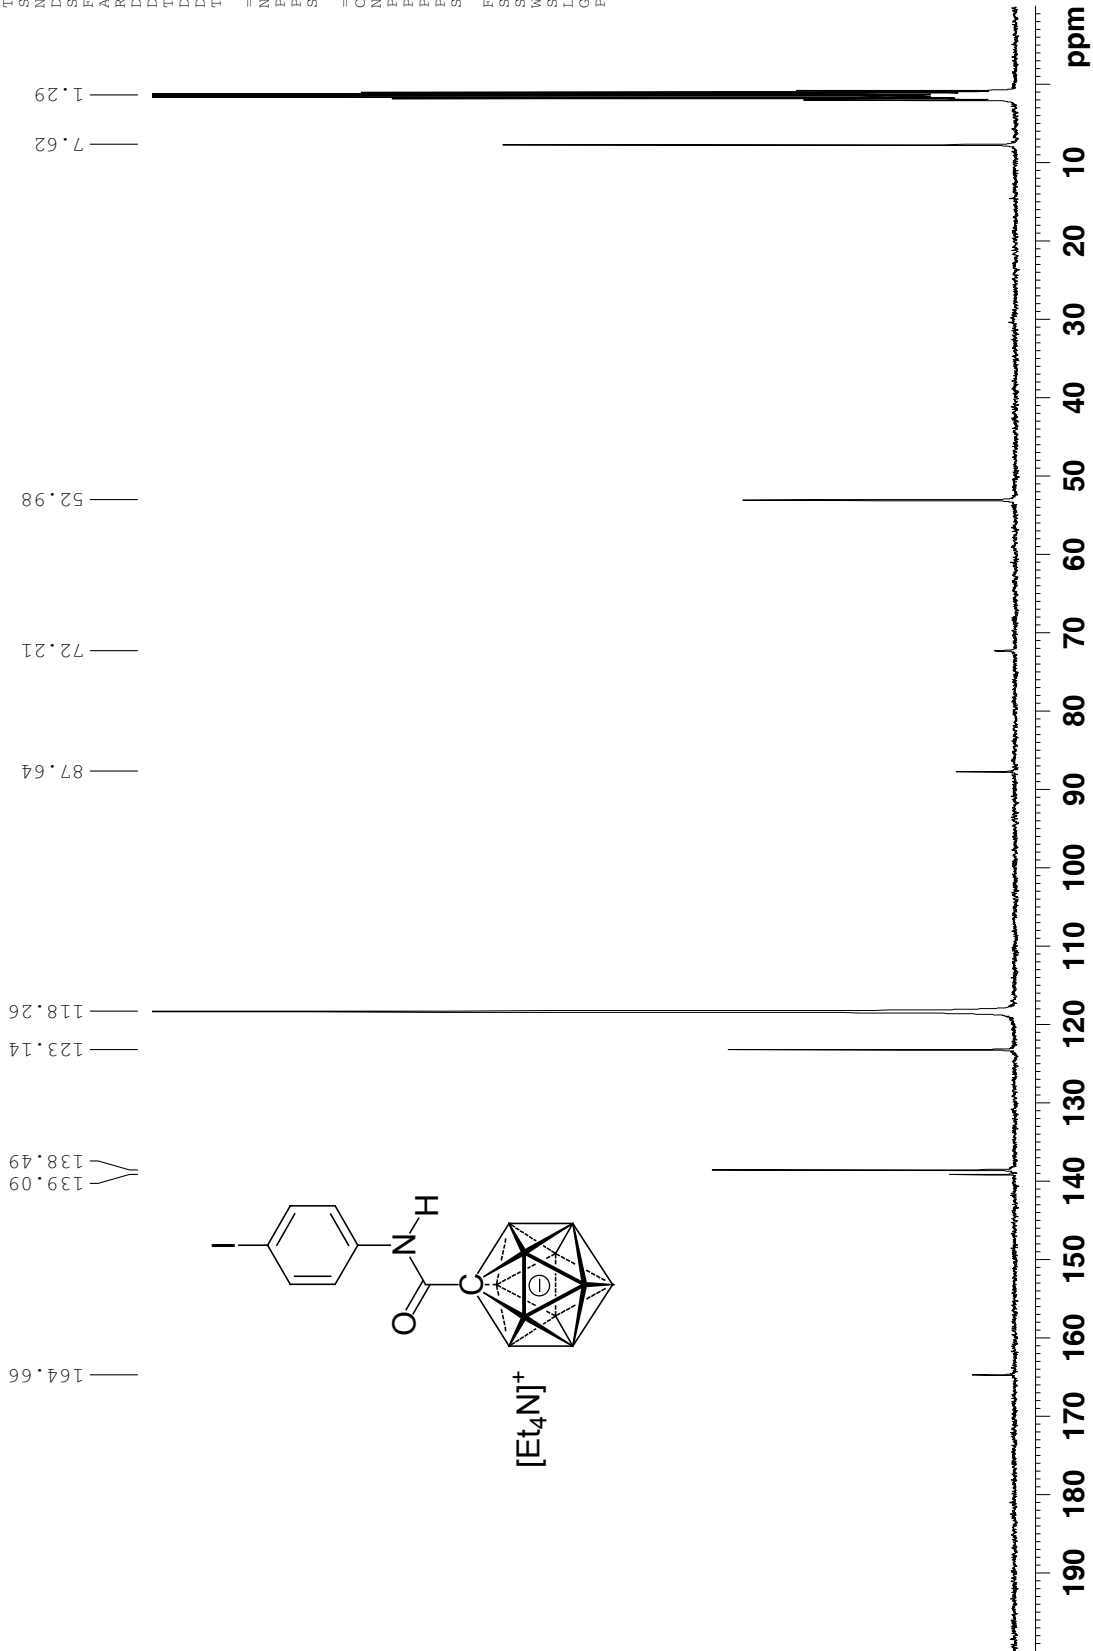

[Et<sub>4</sub>N][12-Br-CB11H10-CONPropyl], Ca. 30mg in acetone-d<sub>6</sub> \*  
 1H{11B}, 128 MHz, T= 22 C

Current Data Parameters  
 NAME 20180201-2HK-Br-SS-propyl  
 EXPNO 1  
 PROCNO 1

F2 - Acquisition Parameters  
 Date\_ 20180203  
 Time\_ 3.21  
 INSTRUM spect  
 PROBHD 5 mm PABBO BB/  
 PULPROG zgig30  
 TD 16384  
 SOLVENT Acetone  
 NS 16  
 DS 4  
 SMH 8012.820 Hz  
 FIDRES 0.489064 Hz  
 AQ 1.0223616 sec  
 RG 86.58  
 DW 62.400 usec  
 DE 6.50 usec  
 TE 294.4 K  
 D1 1.00000000 sec  
 D11 0.03000000 sec  
 TDO 1

==== CHANNEL f1 =====  
 NUC1 1H  
 P1 15.00 usec  
 PL1 12.50000000 W  
 SFO1 400.1320007 MHz  
 ===== CHANNEL f2 =====  
 CPDPRG2 gabra  
 NUC2 11B  
 P2 90.00 usec  
 PL2 52.96599960 W  
 PL12 0.64377998 W  
 SFO2 128.3776050 MHz

F2 - Processing parameters  
 SI 32768  
 SF 400.1300073 MHz  
 EQ 0  
 WDW 0  
 SSB 0  
 LB 1.00 Hz  
 GB 0  
 FC 1.40

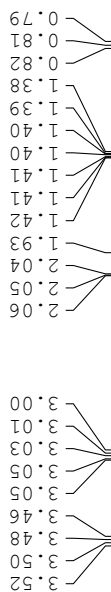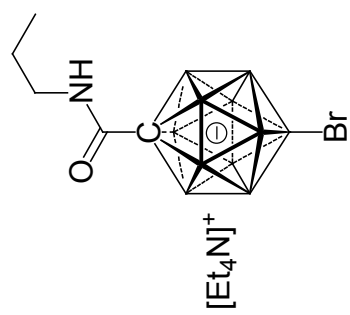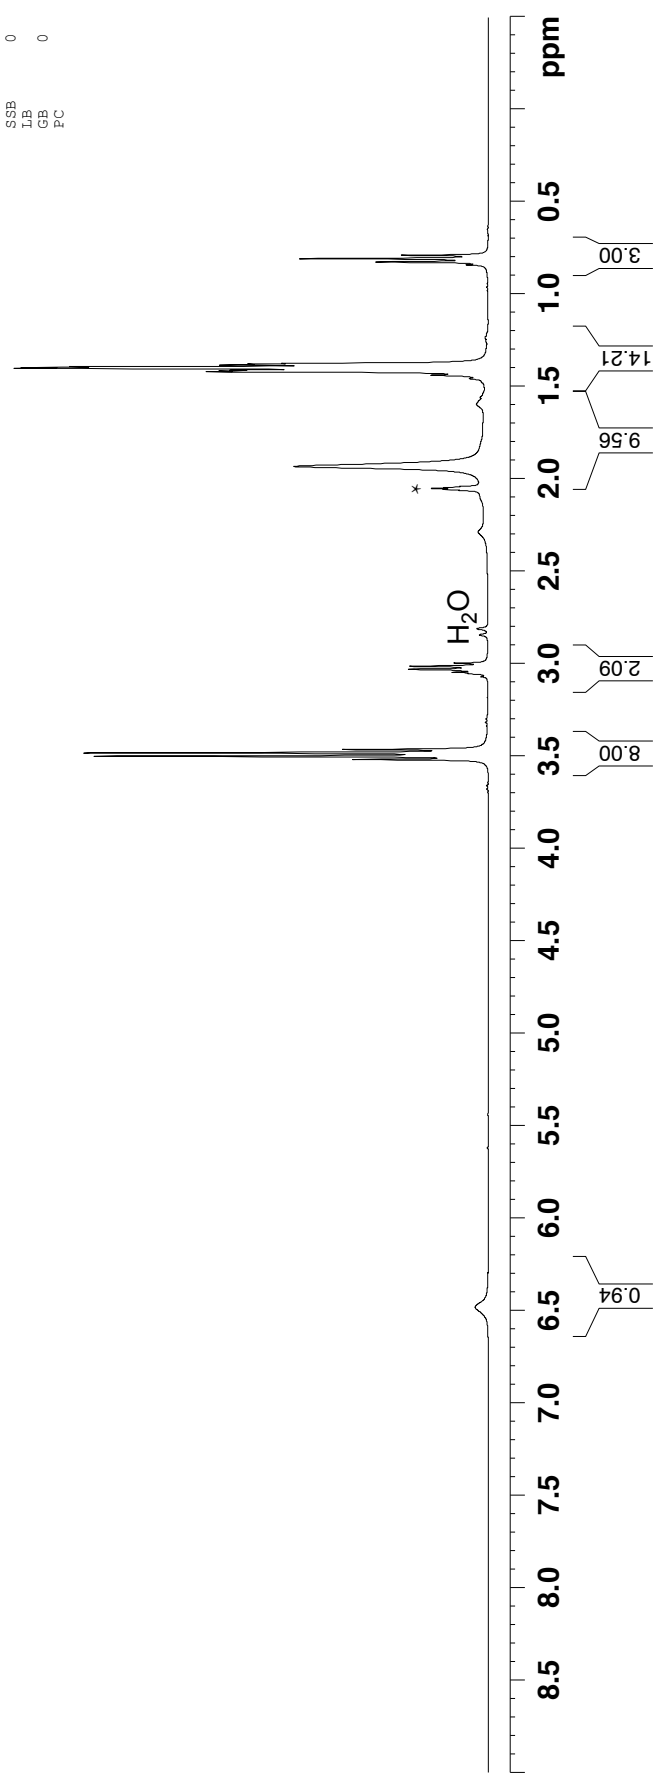

**[Et4N][12-Br-CB11H10-CONPropyl], Ca. 30mg in acetone-d6  
11B, 160 MHz, T = 22 C**

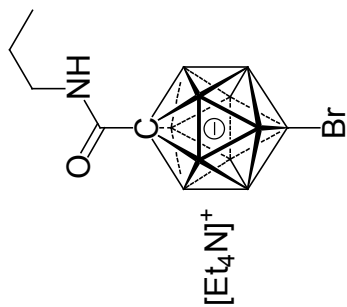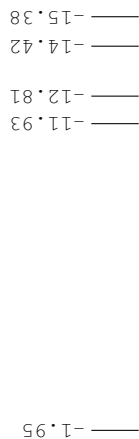

```

Current Data Parameters
NAME      1802-br-pro
EXPNO    1
PROCNO   1

F2 - Acquisition Parameters
Date_    20180323
Time     18.59
INSTRUM spect
PROBHD   5 mm PABBO BB-
PULPROG zg30
TD       64098
SOLVENT  Acetone
NS       32
DS       0
SWH      32051.281 Hz
FIDRES   0.500036 Hz
AQ       0.999288 sec
RG       203
DW       15.600 usec
DE       6.50 usec
TE       295.4 K
D1       1.0000000 sec

===== CHANNEL f1 =====
NUC1     11B
P1       13.10 usec
PLWL     95.0000000 W
SFO1     160.4615792 MHz

F2 - Processing parameters
SI       32768
SF       160.4615790 MHz
WDW      EM
SSB      0
LB       10.00 Hz
GB       0
PC       1.40
    
```

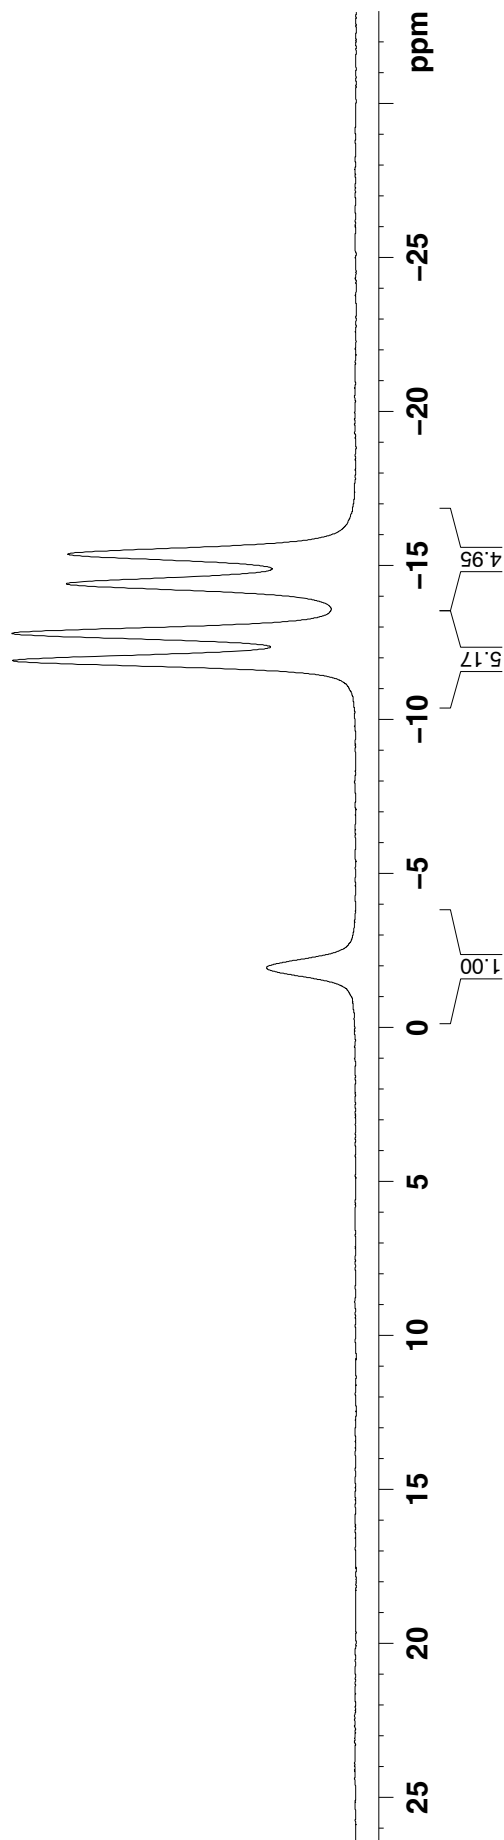

**[Et4N][12-Br-CB11H10-CONPropyl], Ca. 30mg in acetone-d6  
11B{1H}, 160 MHz, T = 22 C**

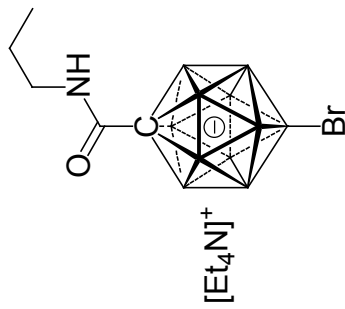

```

Current Data Parameters
NAME      1802-br-pro
EXPNO    2
PROCNO   1

F2 - Acquisition Parameters
Date_    20180323
Time     19.01
INSTRUM  spect
PROBHD   5 mm PABBO BB-
PULPROG  zgpg30
TD       65536
SOLVENT  Acetone
NS       32
DS       0
SWH      32051.281 Hz
FIDRES   0.489064 Hz
AQ       1.0223616 sec
RG       203
DW       15.600 usec
DE       6.50 usec
TE       295.8 K
D1       1.0000000 sec
D11      0.0300000 sec

===== CHANNEL f1 =====
NUC1     11B
P1       13.10 usec
PLW1     95.0000000 W
SFO1     160.4615790 MHz

===== CHANNEL f2 =====
CPDPRG2  waltz16
NUC2     1H
PCPD2    80.00 usec
PLW2     19.0000000 W
PLW12    0.40639001 W
PLW13    0.26008999 W
SFO2     500.1325007 MHz

F2 - Processing parameters
SI       32768
SF       160.4615790 MHz
WDW      EM
SSB      0
LB       5.00 Hz
GB       0
PC       1.40
  
```

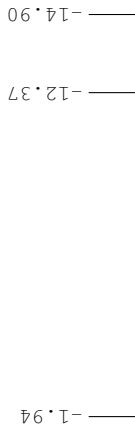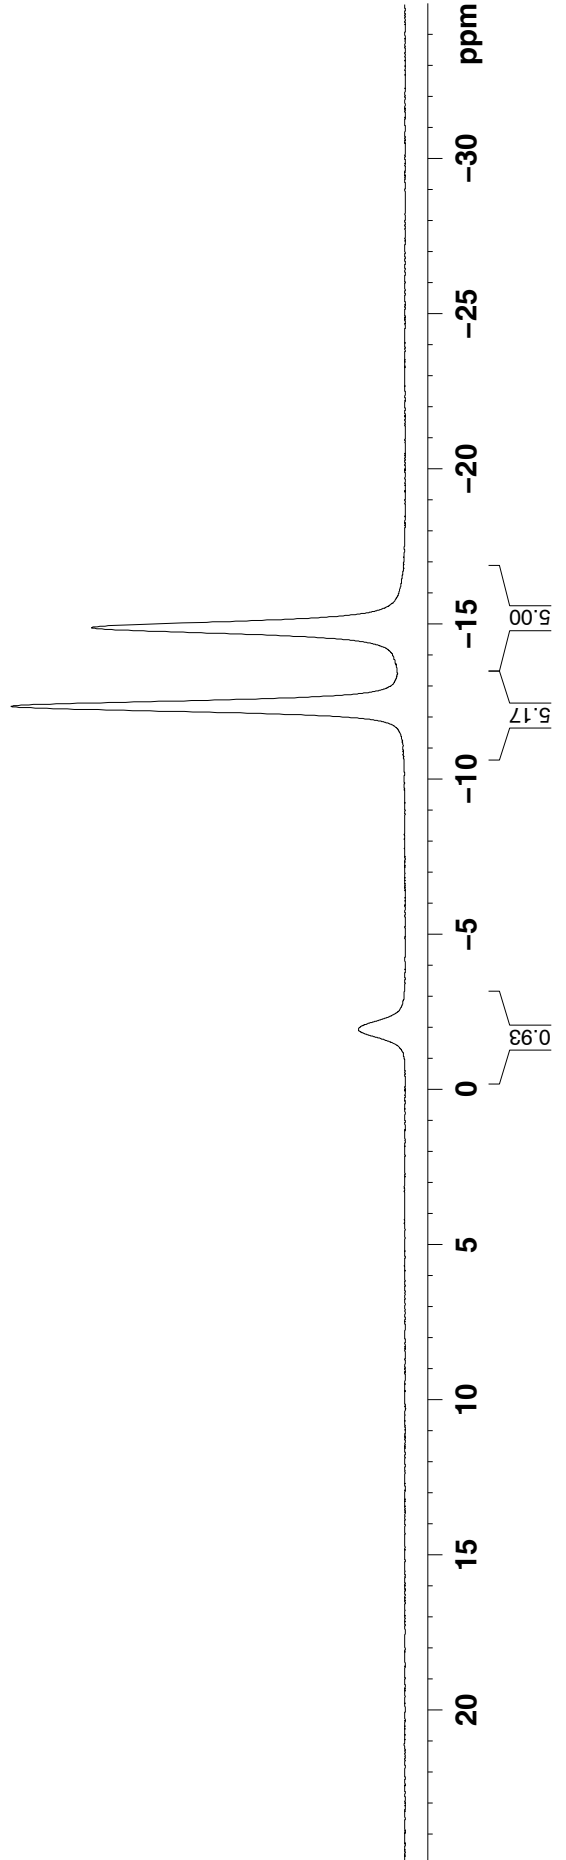

[Et4N][12-Br-CB11H10-CONPropyl], Ca. 30mg in acetone-d6  
<sup>13</sup>C{1H}, 100 MHz, T = 22 C

Current Data Parameters  
 NAME 20180201-ZHK-Br-SS-propyl  
 EXPNO 4  
 PROCNO 1

F2 - Acquisition Parameters  
 Date\_ 20180203  
 Time 4.20  
 INSTRUM spect  
 PROBHD 5 mm PABBO BB/  
 PULPROG zgpg30  
 TD 65536  
 SOLVENT Acetone  
 NS 1024  
 DS 4  
 SWH 29761.904 Hz  
 FIDRES 0.454131 Hz  
 AC 1.1010048 sec  
 RG 193.34  
 DW 16.800 usec  
 DE 6.50 usec  
 TE 295.2 K  
 D1 1.50000000 sec  
 D11 0.03000000 sec  
 TD0 1

==== CHANNEL f1 =====  
 NUC1 <sup>13</sup>C  
 P1 10.00 usec  
 PLW1 53.00000000 W  
 SFO1 100.6228293 MHz

==== CHANNEL f2 =====  
 CPDPRG2 waltz16  
 NUC2 <sup>1</sup>H  
 P2 80.00 usec  
 PLW2 12.50000000 W  
 PLW12 0.43945000 W  
 PLW13 0.28125000 W  
 SFO2 400.1316005 MHz

F2 - Processing parameters  
 SI 32768  
 SF 100.6126845 MHz  
 WDW EM  
 SSB 0  
 LB 3.00 Hz  
 GB 0  
 PC 1.40

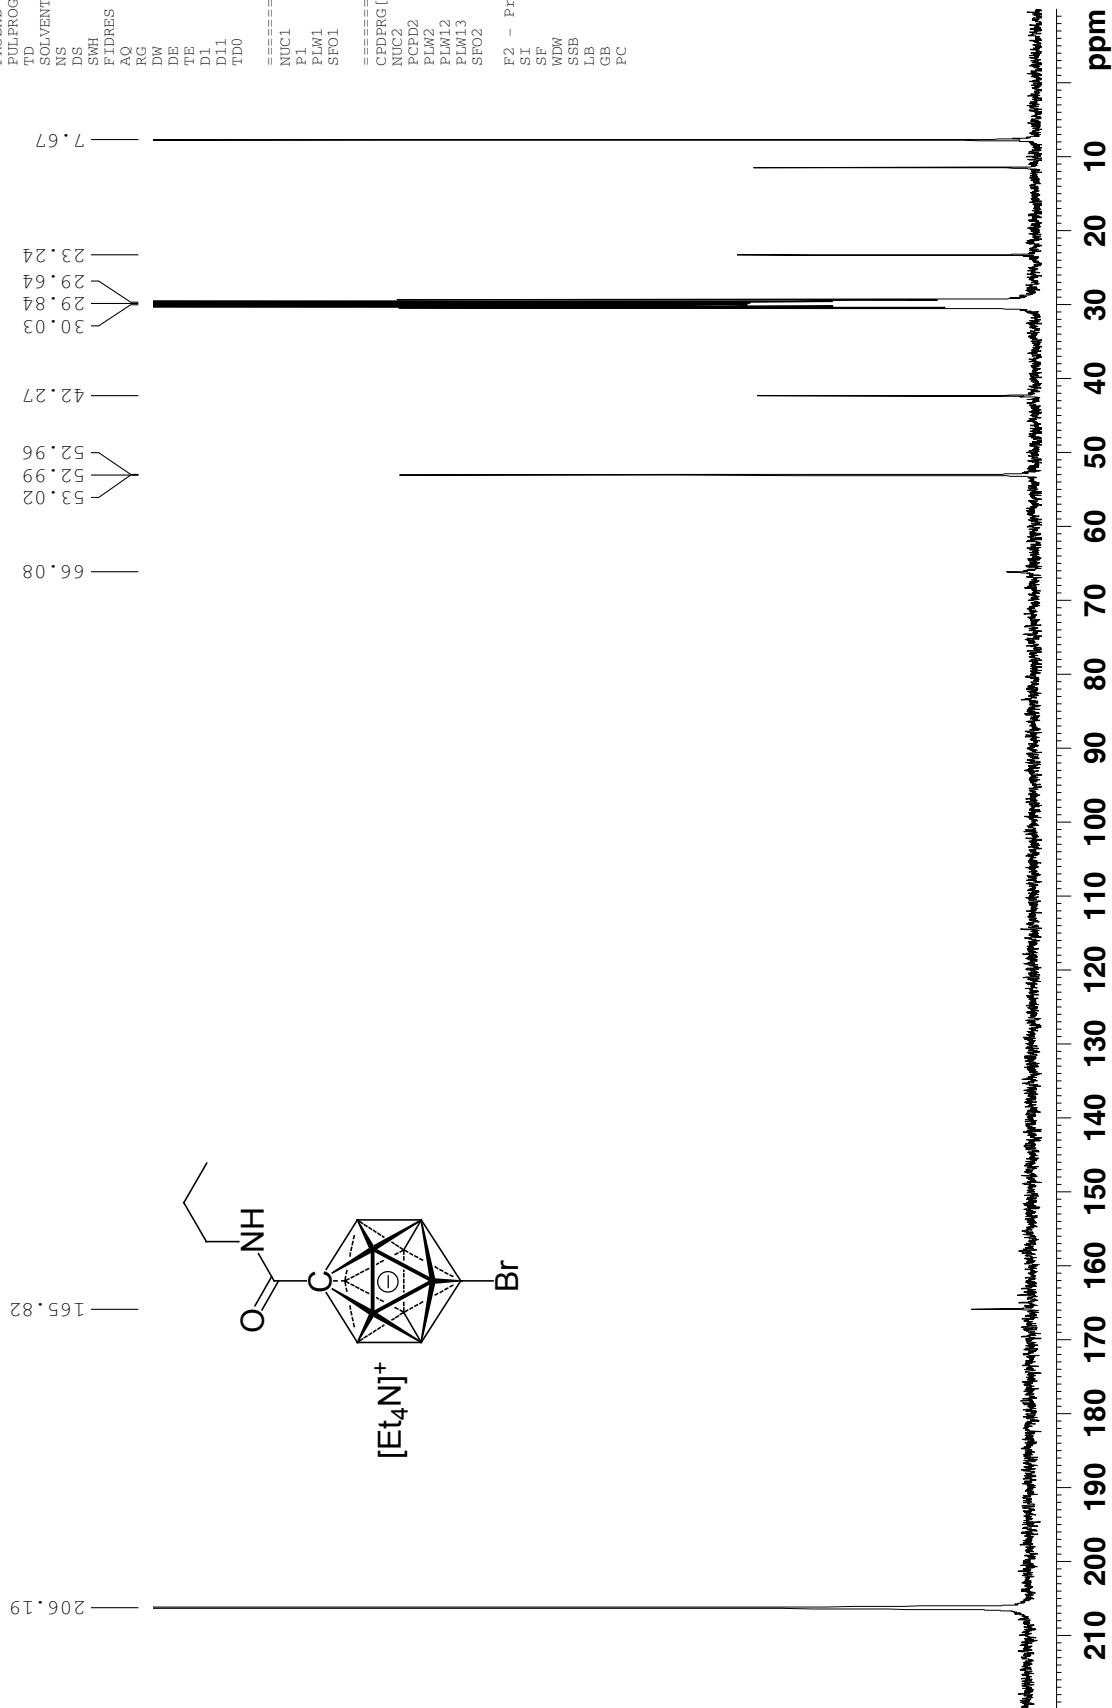



[Et4N][12-I-CB11H10-CONPropyl], Ca. 30mg in acetone-d6\*  
<sup>1</sup>H{<sup>11</sup>B}, 500 MHz, T= 22 °C

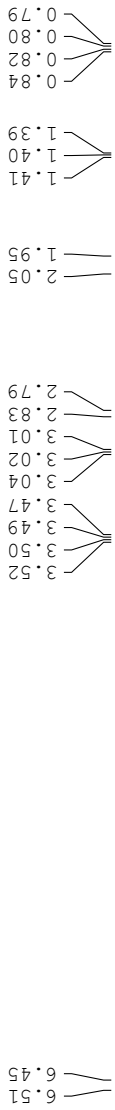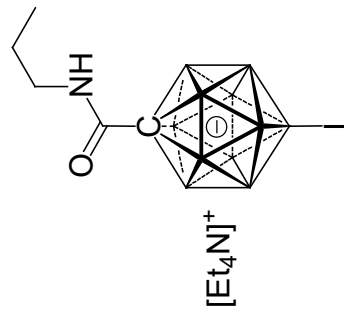

Current Data Parameters  
 NAME 1094-I-Propyl  
 EXPNO 1  
 PROCNO 1  
 F2 - Acquisition Parameters  
 Date\_ 20180202  
 Time\_ 12.02  
 INSTRUM spect  
 PROBHD 5 mm PABBO BB-  
 PULPROG zgpg30  
 TD 65836  
 SOLVENT Acetone  
 NS 16  
 DS 0  
 SWH 12500.000 Hz  
 FIDRES 0.190735 Hz  
 AQ 2.6214399 sec  
 RG 64  
 DM 40.000 usec  
 DE 6.50 usec  
 TE 295.9 K  
 D1 5.00000000 sec  
 D11 0.03000000 sec  
 ===== CHANNEL f1 =====  
 NUC1 <sup>1</sup>H  
 P1 11.70 usec  
 PL1 19.00000000 W  
 SFO1 500.1335009 MHz  
 ===== CHANNEL f2 =====  
 CPDPRG2 garrp  
 NUC2 <sup>11</sup>B  
 P2 100.10 usec  
 PL2 95.00000000 W  
 SFO2 1.63030005 MHz  
 SFO2 160.4615690 MHz  
 F2 - Processing parameters  
 SI 65536  
 SF 500.1300105 MHz  
 ADW EM  
 SSB 0  
 LB 1.00 Hz  
 GB 0  
 FC 1.00

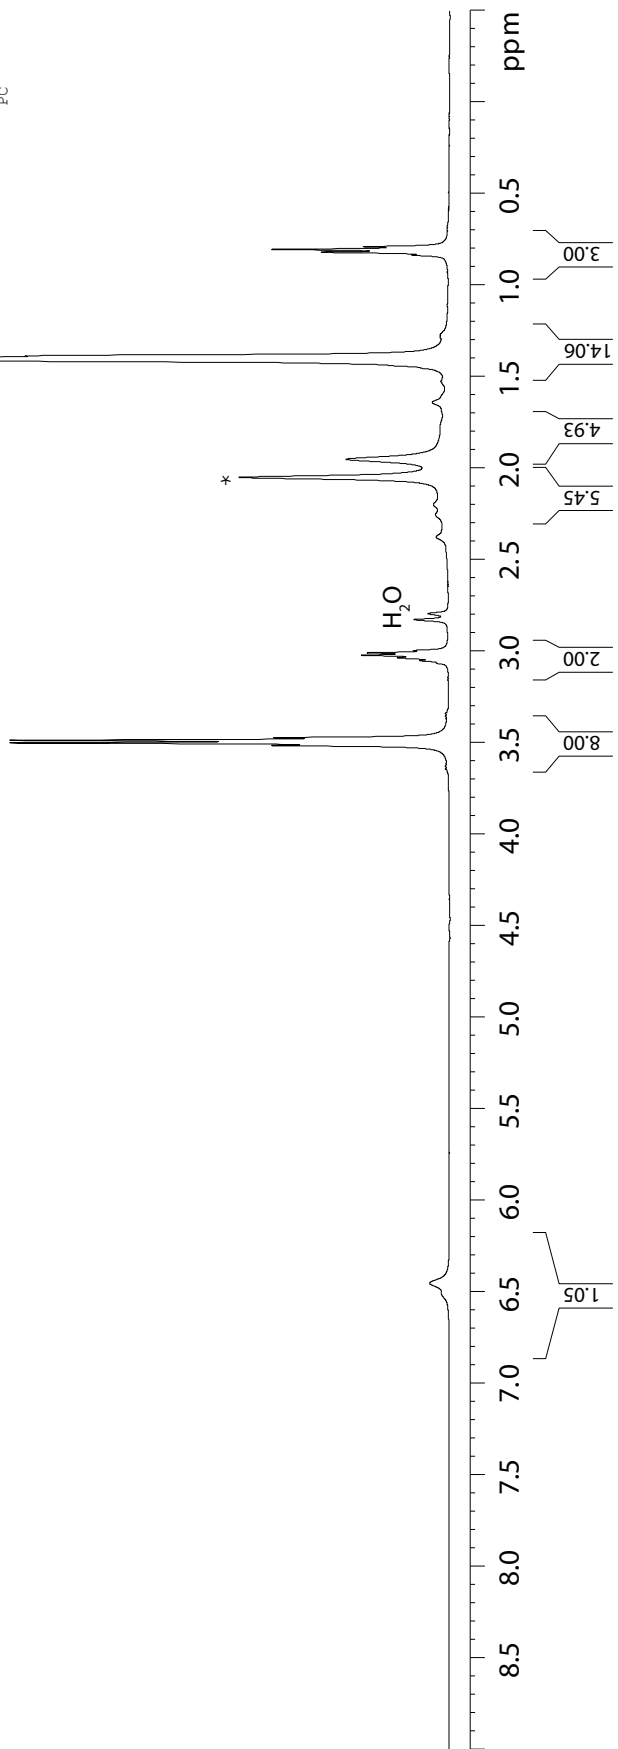

**[Et4N][12-I-CB11H10-CONPropyl], Ca. 30mg in acetone-d6  
11B, 160 MHz, T= 22 C**

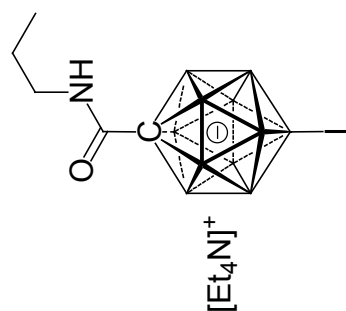

```

Current Data Parameters
NAME      1568-I-SS-propyl
EXPNO     1
PROCNO    1

F2 - Acquisition Parameters
Date_     20180316
Time      22.56
INSTRUM   spect
PROBHD    5 mm PABBO BB-
PULPROG   zg30
TD         64098
SOLVENT   Acetone
NS         32
DS         0
SWH        32051.281 Hz
FIDRES     0.500036 Hz
AQ         0.9999288 sec
RG         203
DW         15.600 usec
DE         6.50 usec
TE         296.9 K
DL         1.00000000 sec

===== CHANNEL f1 =====
NUC1       11B
P1         13.10 usec
PLM1       95.0000000 W
SFO1       160.4615792 MHz

F2 - Processing parameters
SI         32768
SF         160.4615790 MHz
WDW        EM
SSB        0
LB         10.00 Hz
GB         0
PC         1.40
    
```

-11.18  
 -12.08  
 -13.58  
 -14.54  
 -16.97

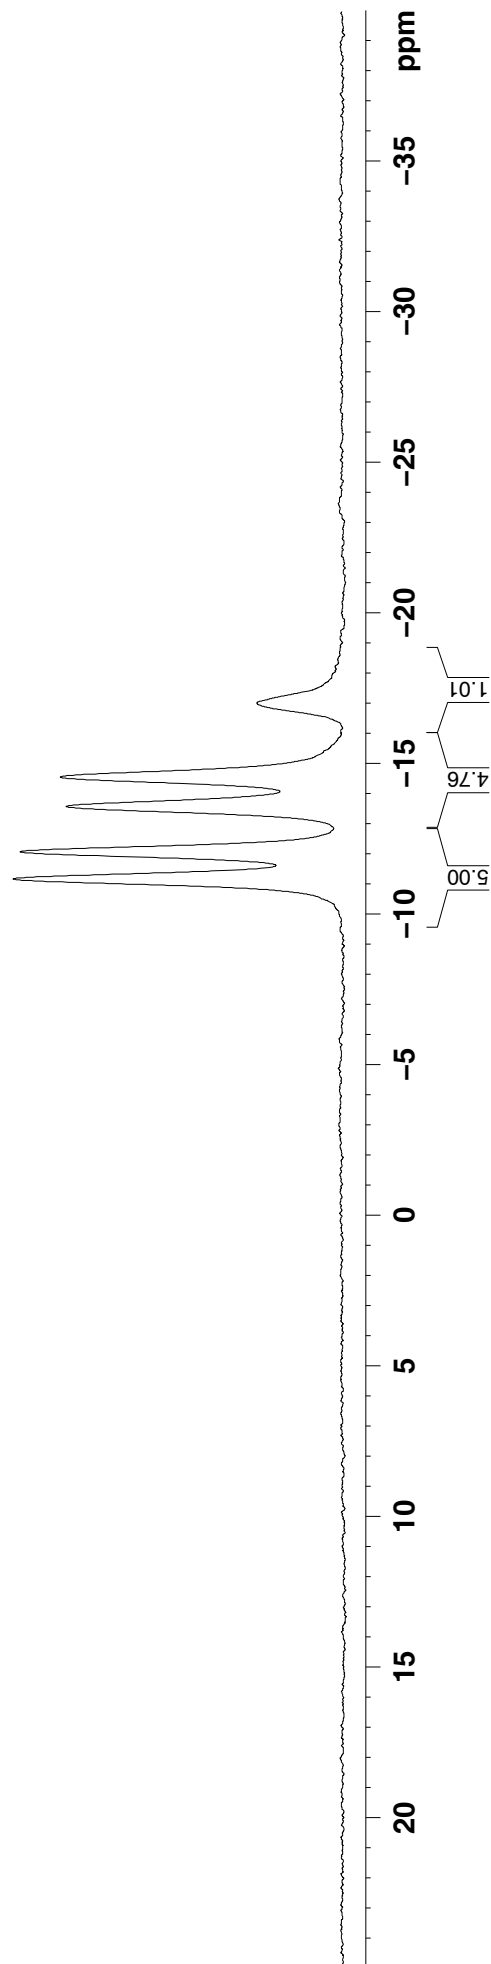

**[Et<sub>4</sub>N][12-I-CB11H10-CONPropyl], Ca. 30mg in acetone-d<sub>6</sub>  
11B{1H}, 160 MHz, T= 22 C**

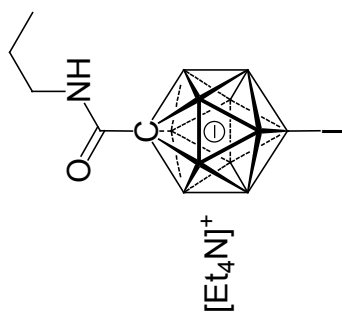

```

Current Data Parameters
NAME      1568-I-SS-propyl
EXPNO     2
PROCNO    1

F2 - Acquisition Parameters
Date_     20180316
Time      22.58
INSTRUM   spect
PROBHD    5 mm PABBO BB-
PULPROG   zgpg30
TD         65536
SOLVENT   Acetone
NS         32
DS         0
SWH        32051.281 Hz
FIDRES     0.489064 Hz
AQ          1.0223616 sec
RG          203
DW          15.600 usec
DE          6.50 usec
TE          297.0 K
D1          1.00000000 sec
D11         0.03000000 sec

===== CHANNEL f1 =====
NUC1       11B
P1         13.10 usec
PLM1       95.00000000 W
SFO1       160.4615790 MHz

===== CHANNEL f2 =====
CPDPRG2    waltz16
NUC2       1H
PCPD2      80.00 usec
PLM2       19.00000000 W
PLM12      0.40639001 W
PLM13      0.26008999 W
SFO2       500.1325007 MHz

F2 - Processing parameters
SI          32768
SF          160.4615790 MHz
WDW         EM
SSB         0
LB          5.00 Hz
GB          0
PC          1.40
    
```

11.64  
14.08  
17.00

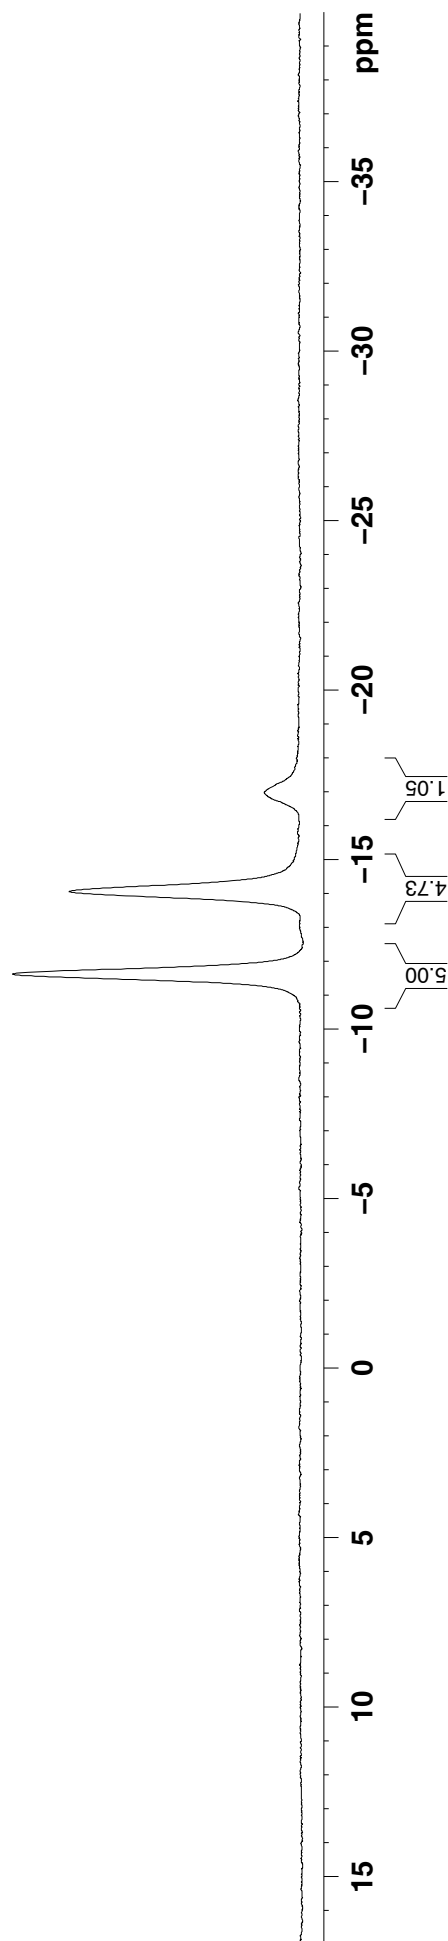

**[Et4N][12-I-CB11H10-CONPropyl], Ca. 30mg in acetone-d6  
13C{1H}, 125 MHz, T = 22 C**

Current Data Parameters  
 NAME 1094-I-Propyl  
 EXPNO 4  
 PROCNO 1

F2 - Acquisition Parameters  
 Date\_ 20180202  
 Time 12.48  
 INSTRUM spect  
 PROBHD 5 mm PABBO BB-  
 PULPROG zgpg30  
 TD 65536  
 SOLVENT Acetone  
 NS 1024  
 DS 4  
 SMH 37878.789 Hz  
 FIDRES 0.577984 Hz  
 AQ 0.8650752 sec  
 RG 203  
 DW 13.200 usec  
 DE 6.50 usec  
 TE 296.2 K  
 D1 1.50000000 sec  
 D11 0.03000000 sec

==== CHANNEL f1 =====  
 NUC1 13C  
 P1 10.50 usec  
 PLW1 95.0000000 W  
 SFO1 125.716224 MHz

==== CHANNEL f2 =====  
 CPDPRG2 waltz16  
 NUC2 1H  
 PCPD2 80.00 usec  
 PLW2 19.0000000 W  
 PLW12 0.40639001 W  
 PLW13 0.26008999 W  
 SFO2 500.1320005 MHz

F2 - Processing parameters  
 SI 32768  
 SF 125.7576832 MHz  
 WDW EM  
 SSB 0  
 LB 4.00 Hz  
 GB 0  
 FC 1.40

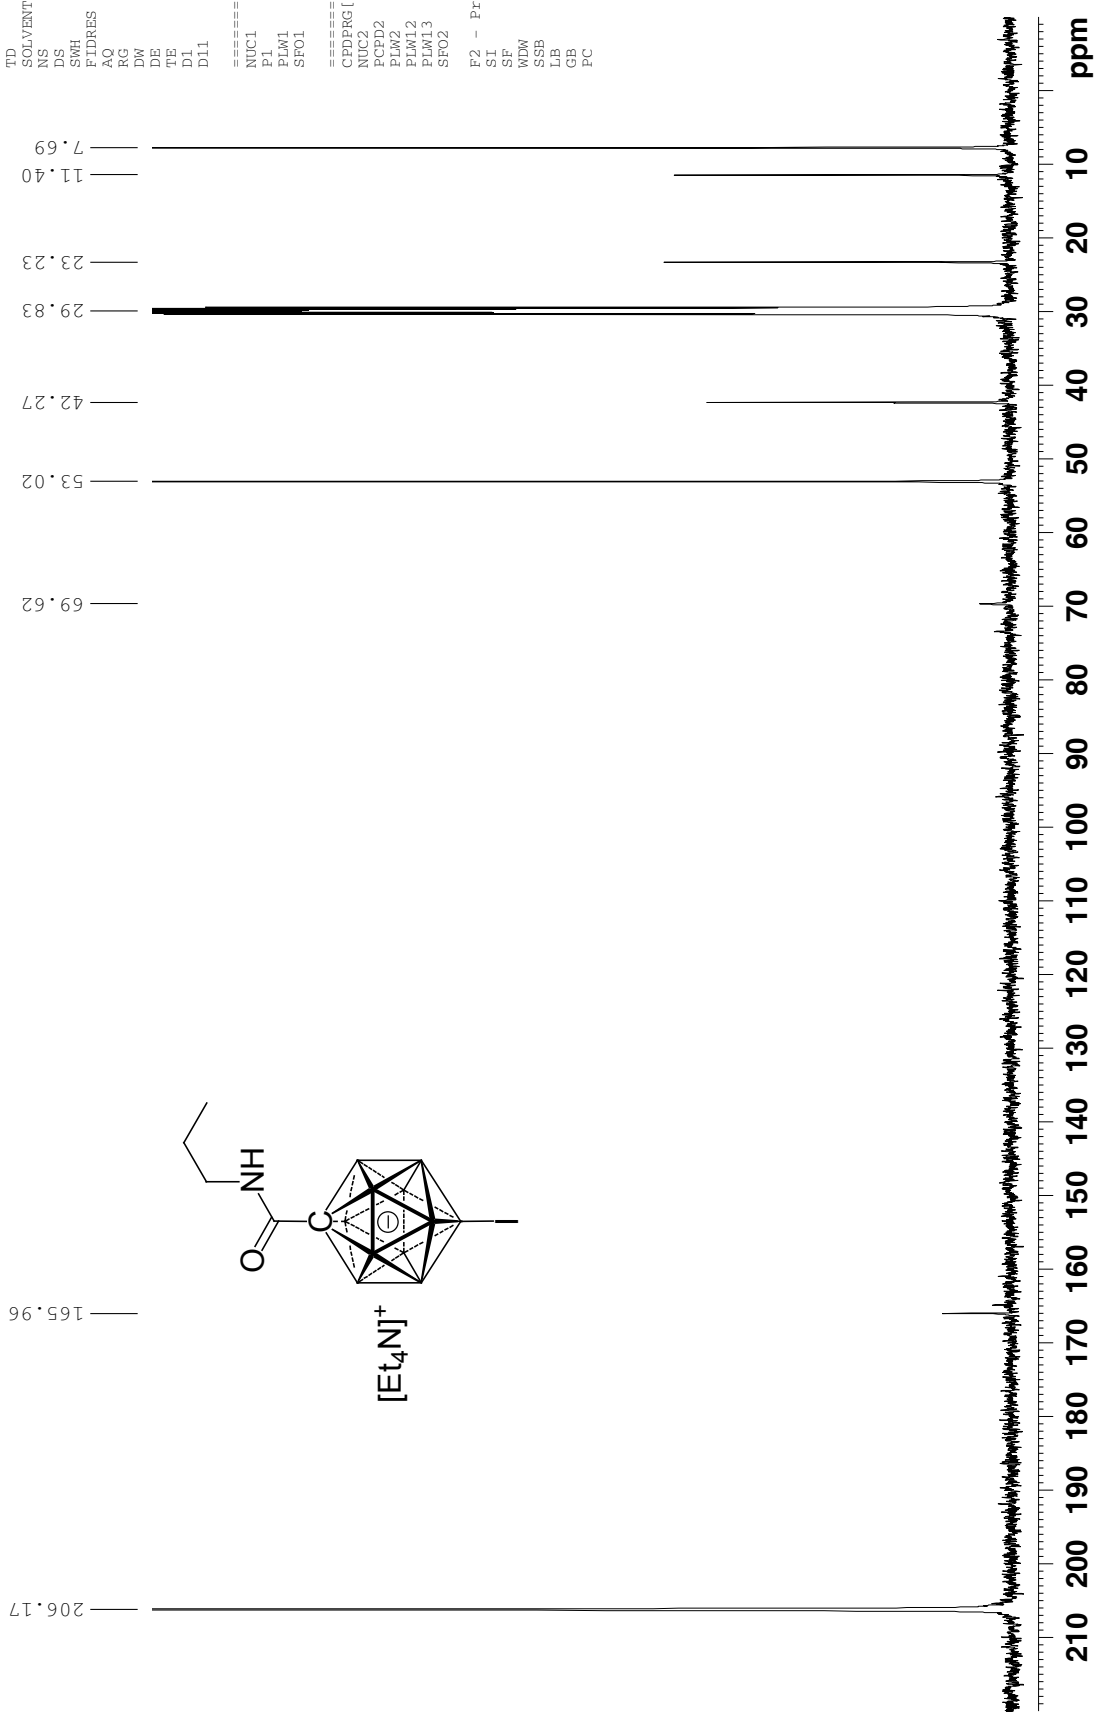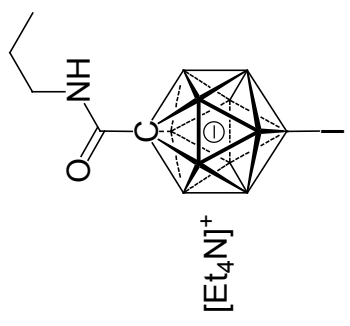

[Et<sub>4</sub>N][12-Br-CB11H10-CONHC6H5], Ca. 30mg in acetone-d<sub>6</sub> \*  
 1H{11B}, 400 MHz, T= 22 C

Current Data Parameters  
 NAME 20180201-2HK-Br-SS-phenyl  
 EXPNO 1  
 PROCNO 1

F2 - Acquisition Parameters  
 Date\_ 20180203  
 Time\_ 5.21  
 INSTRUM spect  
 PROBHD 5 mm PABBO BB/  
 PULPROG zgpg30  
 TD 16384  
 SOLVENT Acetone  
 NS 16  
 DS 4  
 SMH 8012.820 Hz  
 FIDRES 0.489064 Hz  
 AQ 1.0223616 sec  
 RG 78.69  
 DW 62.400 usec  
 DE 6.50 usec  
 TE 294.4 K  
 D1 1.00000000 sec  
 D11 0.03000000 sec  
 TD0 1

==== CHANNEL f1 =====  
 NUC1 1H  
 P1 15.00 usec  
 PL1 12.50000000 W  
 SFO1 400.1320007 MHz  
 ===== CHANNEL f2 =====  
 CPDPRG2 garr4  
 NUC2 11B  
 P2 90.00 usec  
 PL2 52.96599960 W  
 PL12 6.6437798 W  
 SFO2 128.3776050 MHz

F2 - Processing parameters  
 SI 32768  
 SF 400.1300051 MHz  
 EQ EM  
 WDW 0  
 LB 0  
 GB 0  
 PC 1.40

1.36  
1.37  
1.37  
1.38  
1.38  
1.39  
1.40  
1.40  
1.41  
2.01  
2.04  
2.05  
2.05

3.44  
3.46  
3.48  
3.50

7.06  
7.26  
7.28  
7.30  
7.30  
7.59  
7.61  
8.14

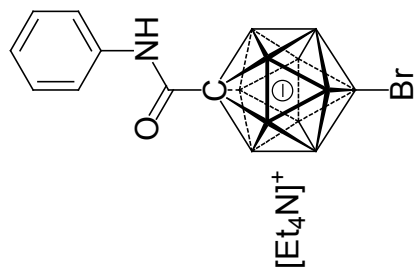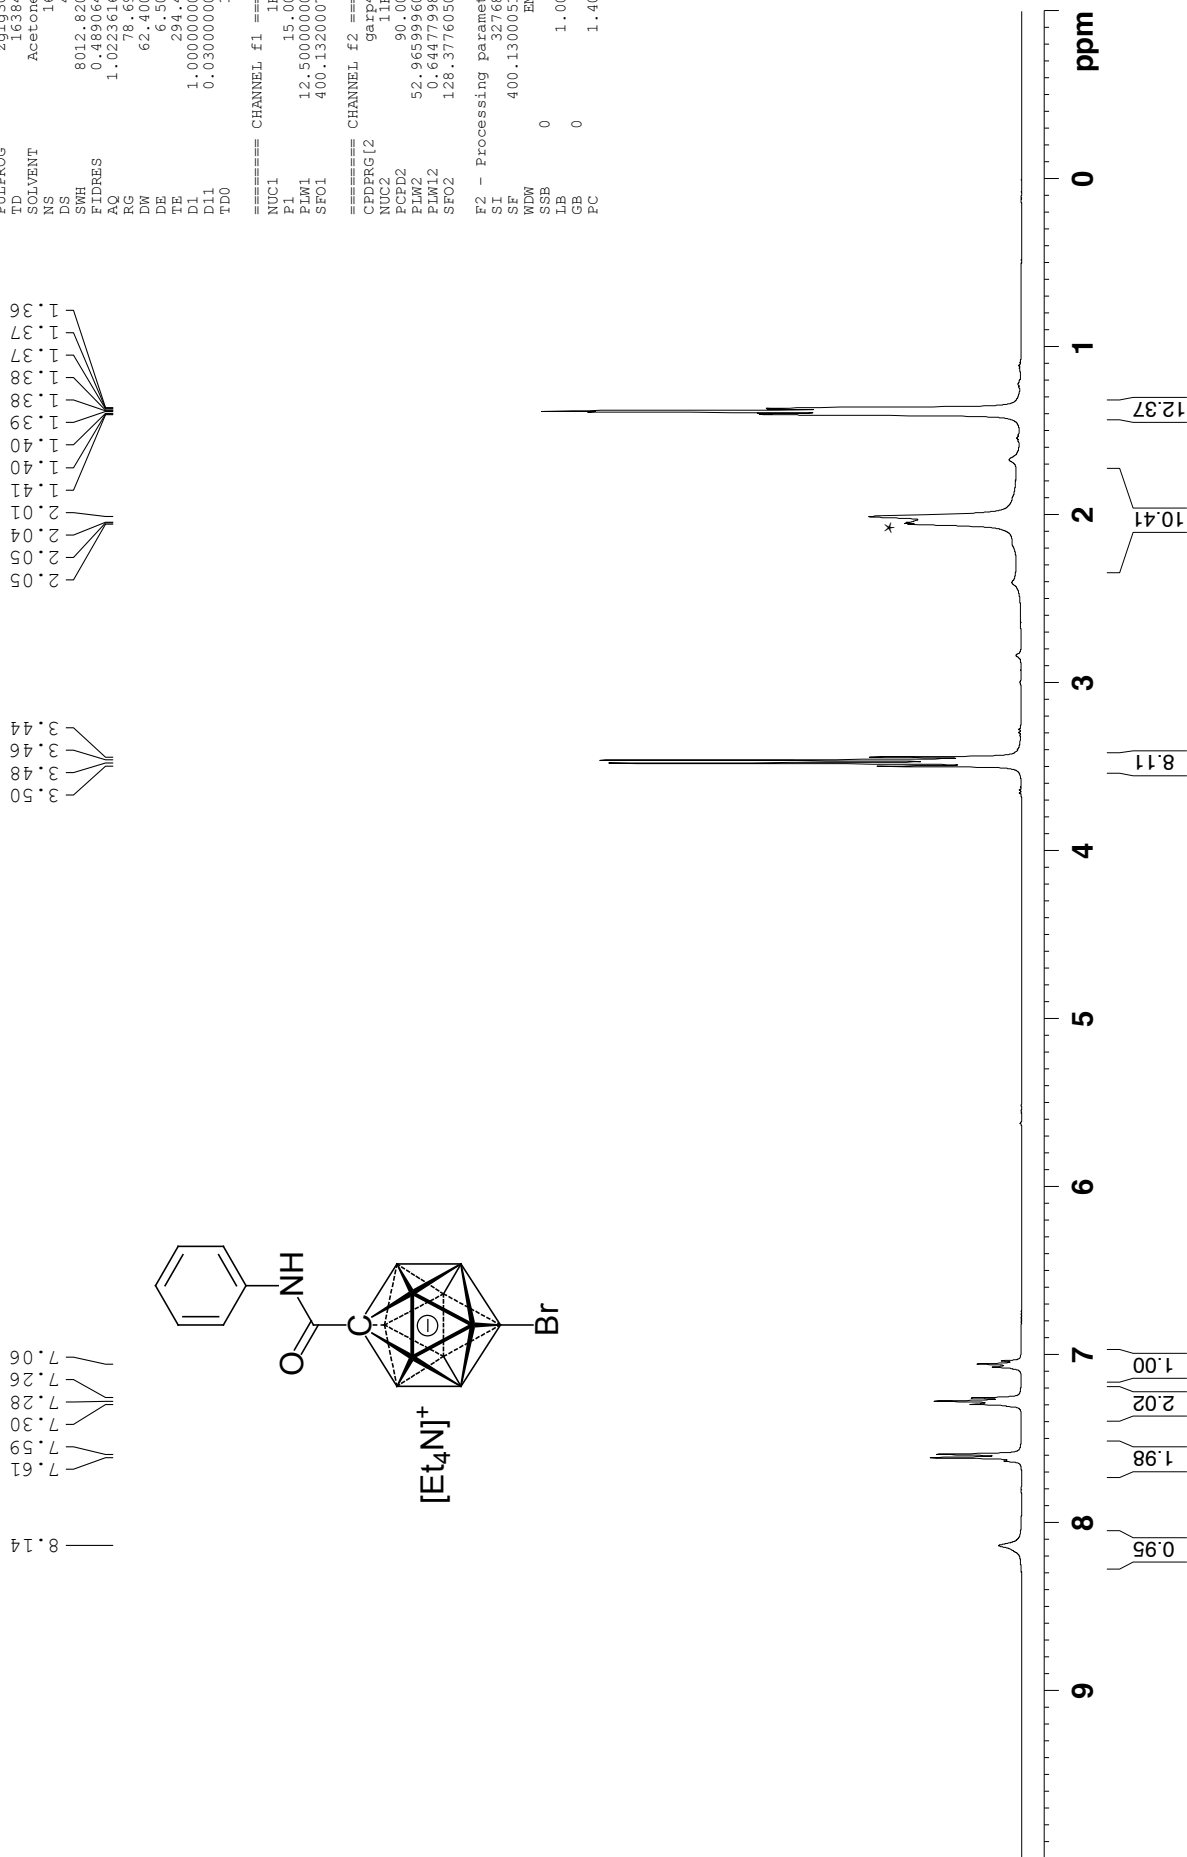

**[Et<sub>4</sub>N][12-Br-CB11H<sub>10</sub>-CONHC<sub>6</sub>H<sub>5</sub>], Ca. 30mg in acetone-d<sub>6</sub>  
11B, 160 MHz, T = 22 C**

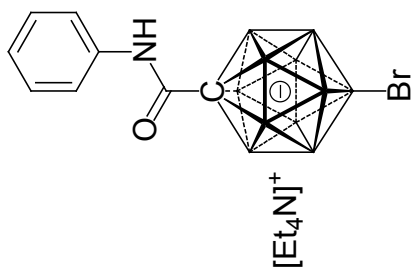

-1.58  
 -11.68  
 -12.57  
 -14.34  
 -15.30

Current Data Parameters  
 NAME 1801-br-ph  
 EXPNO 1  
 PROCNO 1  
 F2 - Acquisition Parameters  
 Date\_ 20180323  
 Time 18.52  
 INSTRUM spect  
 PROBHD 5 mm PABBO BB-  
 PULPROG zg30  
 TD 64098  
 SOLVENT Acetone  
 NS 32  
 DS 0  
 SWH 32051.281 Hz  
 FIDRES 0.500036 Hz  
 AQ 0.999288 sec  
 RG 203  
 DW 15.600 usec  
 DE 6.50 usec  
 TE 295.4 K  
 D1 1.0000000 sec  
 ===== CHANNEL f1 =====  
 NUC1 11B  
 P1 13.10 usec  
 PLW1 95.0000000 W  
 SFO1 160.4615792 MHz  
 F2 - Processing parameters  
 SI 32768  
 SF 160.4615790 MHz  
 WDW EM  
 SSB 0  
 LB 10.00 Hz  
 GB 0  
 PC 1.40

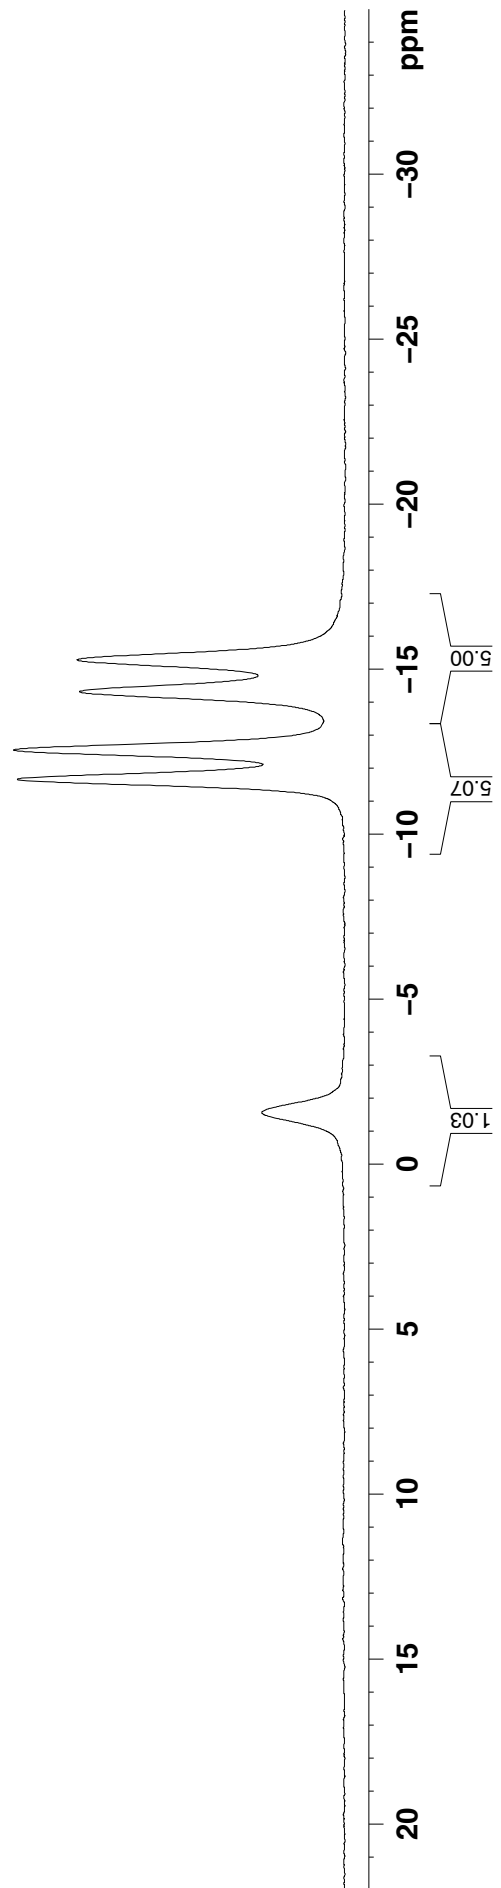

[Et<sub>4</sub>N][12-Br-CB11H<sub>10</sub>-CONHC<sub>6</sub>H<sub>5</sub>], Ca. 30mg in acetone-d<sub>6</sub>  
 11B{1H}, 160 MHz, T = 22 C

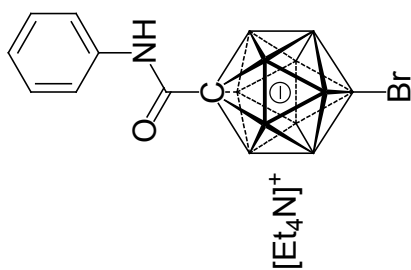

```

Current Data Parameters
NAME      1801-br-ph
EXPNO    2
PROCNO   1

F2 - Acquisition Parameters
Date_    20180323
Time     18.54
INSTRUM  spect
PROBHD   5 mm PABBO BB-
PULPROG  zgpg30
TD       65536
SOLVENT  Acetone
NS       32
DS       0
SWH      32051.281 Hz
FIDRES   0.489064 Hz
AQ       1.0223616 sec
RG       203
DW       15.600 usec
DE       6.50 usec
TE       295.8 K
D1       1.0000000 sec
D11      0.0300000 sec

===== CHANNEL f1 =====
NUC1     11B
P1       13.10 usec
PLW1    95.0000000 W
SFO1    160.4615790 MHz

===== CHANNEL f2 =====
CPDPRG2  waltz16
NUC2     1H
PCPD2    80.00 usec
PLW2    19.0000000 W
PLW12   0.40639001 W
PLW13   0.26008999 W
SFO2    500.1325007 MHz

F2 - Processing parameters
SI       32768
SF       160.4615790 MHz
WDW      EM
SSB      0
LB       5.00 Hz
GB       0
PC       1.40
    
```

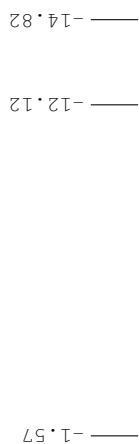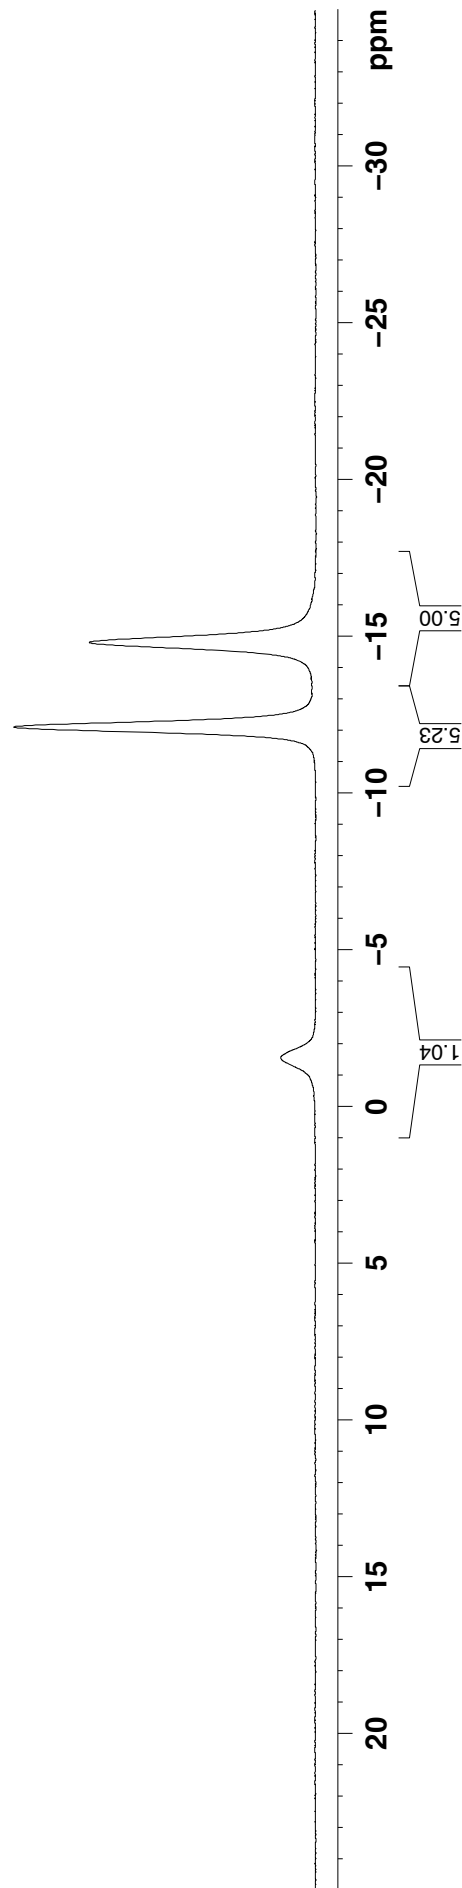

**[Et<sub>4</sub>N][12-Br-CB11H<sub>10</sub>-CONHC<sub>6</sub>H<sub>5</sub>], Ca. 30mg in acetone-d<sub>6</sub>  
<sup>13</sup>C{<sup>1</sup>H}, 100 MHz, T = 22 C**

Current Data Parameters  
 NAME 20180201-ZHK-Br-SS-phenyl  
 EXPNO 4  
 PROCNO 1

F2 - Acquisition Parameters  
 Date\_ 20180203  
 Time 5.58  
 INSTRUM spect  
 PROBHD 5 mm PABBO BB/  
 PULPROG zgpg30  
 TD 65536  
 SOLVENT Acetone  
 NS 512  
 DS 4  
 SWH 29761.904 Hz  
 FIDRES 0.454131 Hz  
 AC 1.1010048 sec  
 RG 193.34  
 DW 16.800 usec  
 DE 6.50 usec  
 TE 294.9 K  
 D1 1.50000000 sec  
 D11 0.03000000 sec  
 TD0 1

==== CHANNEL f1 =====  
 NUC1 <sup>13</sup>C  
 P1 10.00 usec  
 PLW1 53.00000000 W  
 SFO1 100.6228293 MHz  
 ===== CHANNEL f2 =====  
 CPDPRG[2] waltz16  
 NUC2 <sup>1</sup>H  
 P1 80.00 usec  
 PLW2 12.50000000 W  
 PLW12 0.43945000 W  
 PLW13 0.28125000 W  
 SFO2 400.1316005 MHz  
 F2 - Processing parameters  
 SI 32768  
 SF 100.6126853 MHz  
 WDM EM  
 SSB 0  
 LB 5.00 Hz  
 GB 0  
 PC 1.40

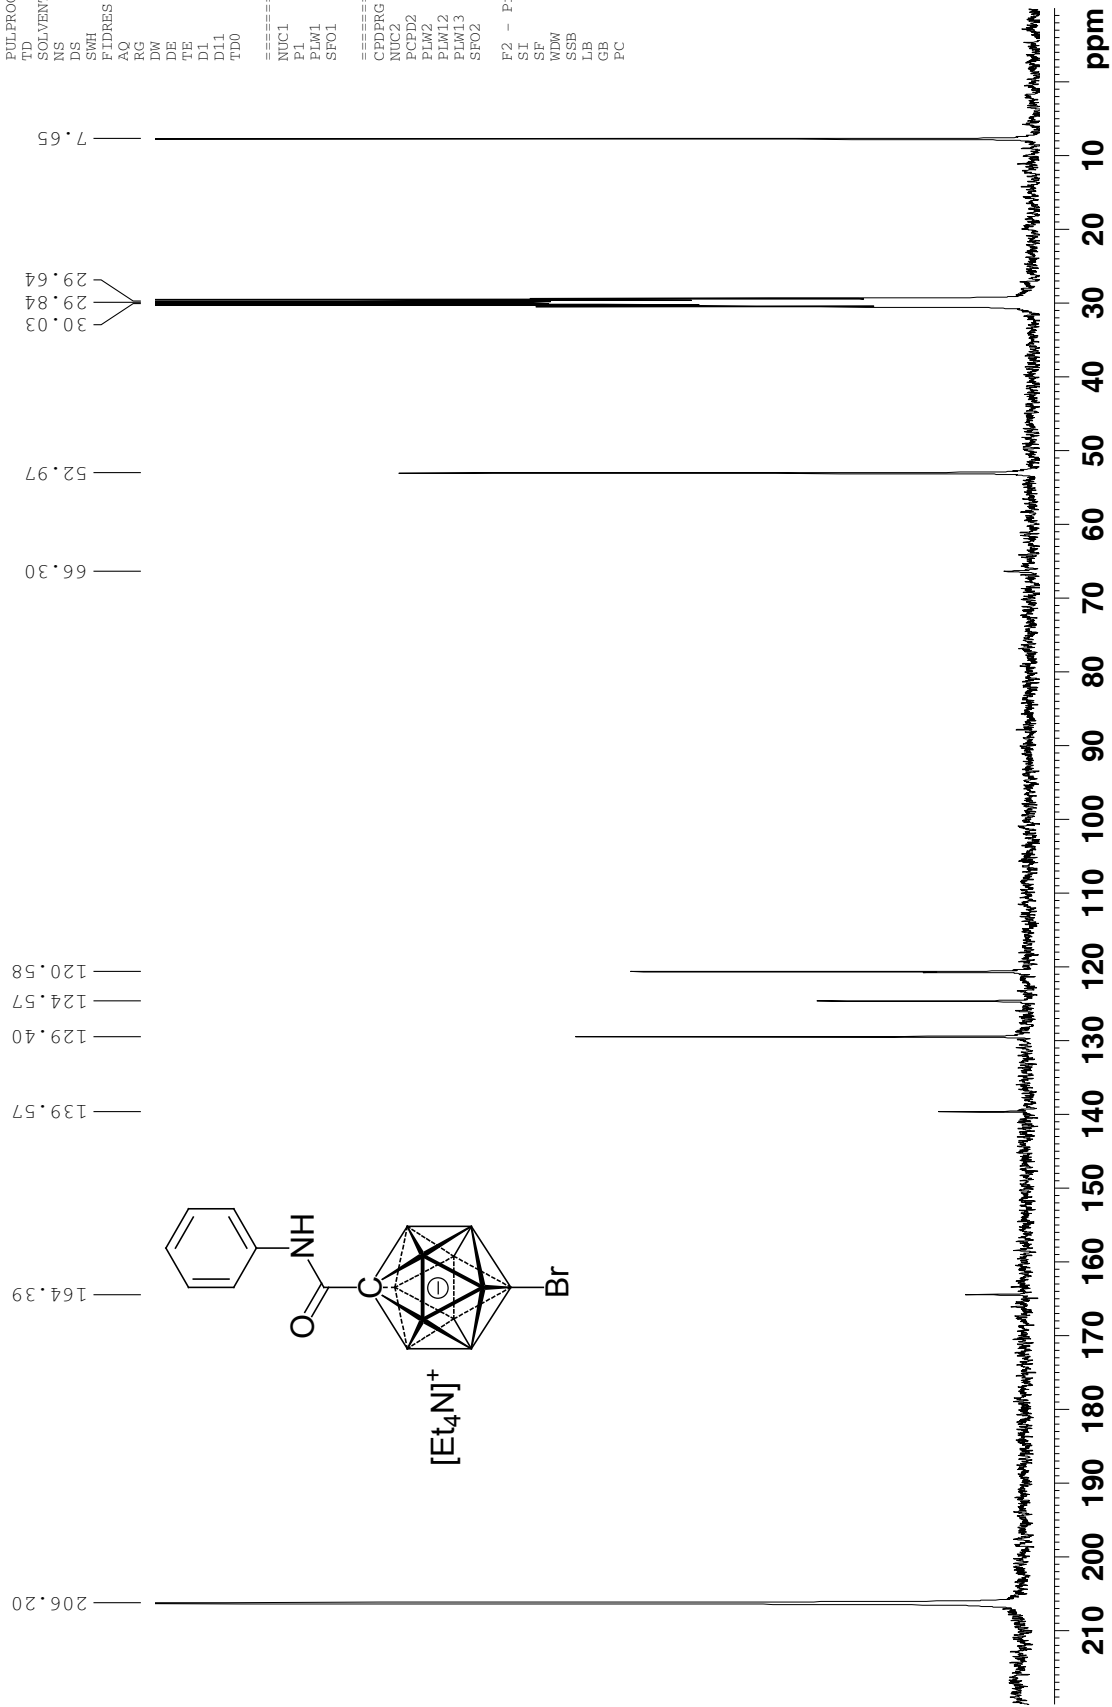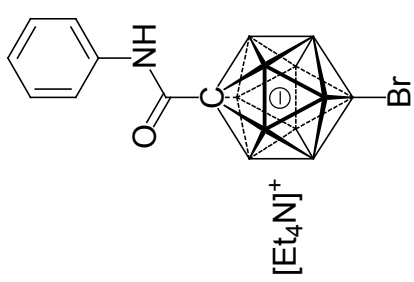



[Et4N][12-I-CB11H10-CONHC6H5], Ca. 30mg in acetone-d6  
<sup>1</sup>H{<sup>11</sup>B}, 500 MHz, T= 22 °C

8.10  
 7.60  
 7.58  
 7.28  
 7.27  
 7.25  
 7.07  
 7.06  
 7.05  
 7.03

3.49  
 3.48  
 3.46  
 3.45

2.81

2.12  
 2.05  
 2.05

1.40  
 1.39  
 1.38  
 1.37  
 1.37

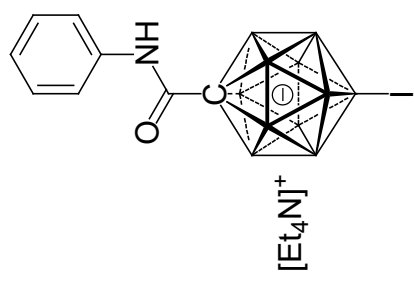

Current Data Parameters  
 NAME 1095-I-Phenyl  
 EXPNO 1  
 PROCNO 1

F2 - Acquisition Parameters  
 Date\_ 20180202  
 Time\_ 12.54  
 INSTRUM spect  
 PROHD 5 mm PABBO BB-  
 PULPROG zgpg30  
 TD 65536  
 SOLVENT Acetone  
 NS 16  
 DS 10  
 SWH 12500.000 Hz  
 FIDRES 0.190735 Hz  
 AQ 2.621439 sec  
 RG 64  
 DM 40.000 usec  
 DE 6.50 usec  
 TE 296.1 K  
 D1 5.0000000 sec  
 D11 0.0300000 sec

==== CHANNEL f1 =====  
 NUC1 <sup>1</sup>H  
 P1 11.70 usec  
 PL1 19.0000000 W  
 SF01 500.1355009 MHz

==== CHANNEL f2 =====  
 CPDPRG2 garrp  
 NUC2 <sup>11</sup>B  
 P2 100.10 usec  
 PL2 95.0000000 W  
 SF02 1.63030005 MHz  
 SFO2 160.4615690 MHz

F2 - Processing parameters  
 SI 32768  
 SF 500.1300108 MHz  
 ADW EM  
 SSB 0  
 LB 1.00 Hz  
 GB 0  
 FC 1.00

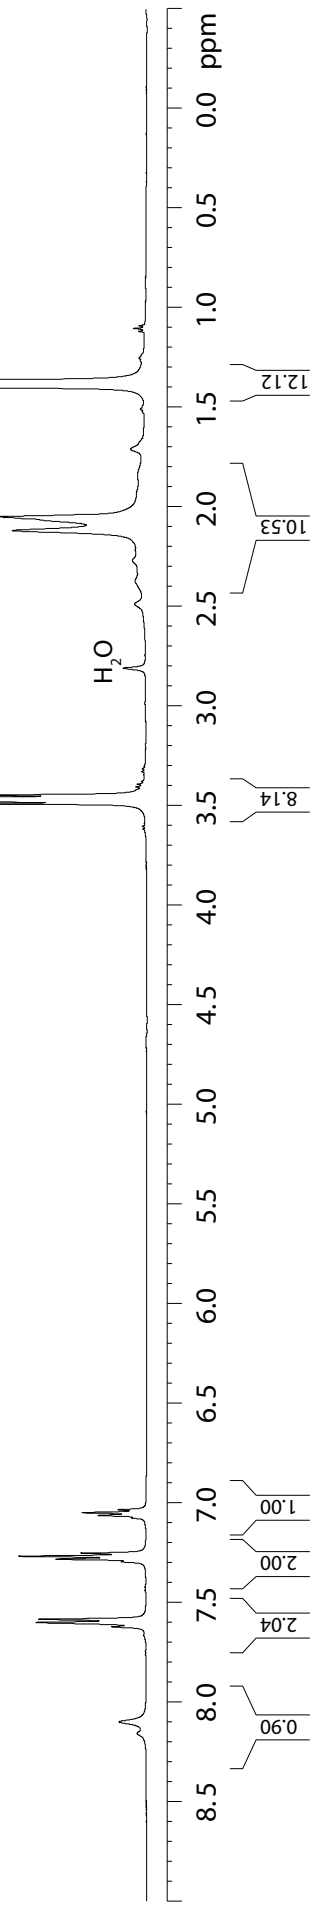

**[Et<sub>4</sub>N][12-|-CB11H10-CONHC6H5], Ca. 30mg in acetone-d<sub>6</sub>  
11B, 160 MHz, T = 22 C**

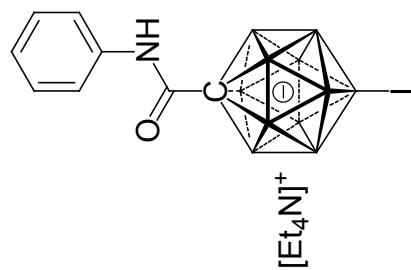

```

Current Data Parameters
NAME      1569-I-SS-phenyl
EXPNO     1
PROCNO    1

F2 - Acquisition Parameters
Date_     20180316
Time      23.02
INSTRUM   spect
PROBHD    5 mm PABBO BB-
PULPROG   zg30
TD         64098
SOLVENT   Acetone
NS         32
DS         0
SWH        32051.281 Hz
FIDRES     0.500036 Hz
AQ         0.9999288 sec
RG         203
DW         15.600 usec
DE         6.50 usec
TE         296.9 K
DL         1.00000000 sec

===== CHANNEL f1 =====
NUC1       11B
P1         13.10 usec
PLM1       95.00000000 W
SFO1       160.4615792 MHz

F2 - Processing parameters
SI         32768
SF         160.4615790 MHz
WDW        EM
SSB        0
LB         10.00 Hz
GB         0
PC         1.40
    
```

-10.92  
 -11.83  
 -13.46  
 -14.43  
 -16.65

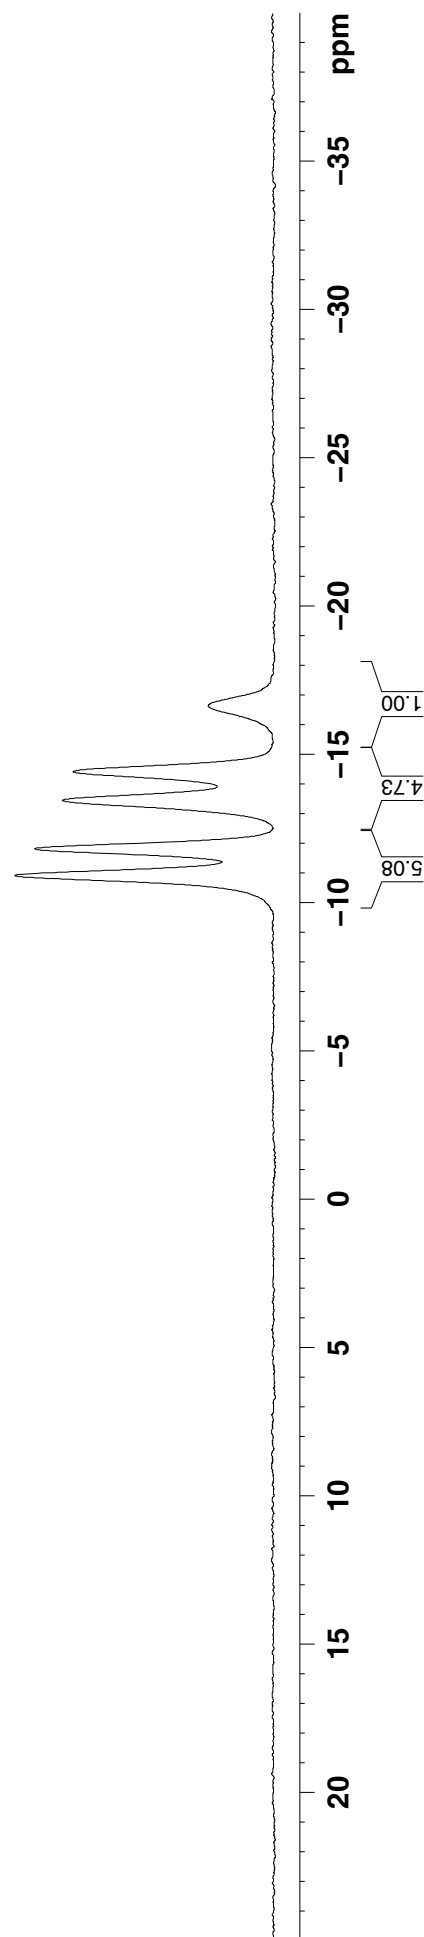

**[Et<sub>4</sub>N][12-I-CB11H10-CONHC6H5], Ca. 30mg in acetone-d<sub>6</sub>  
11B{1H}, 160 MHz, T= 22 C**

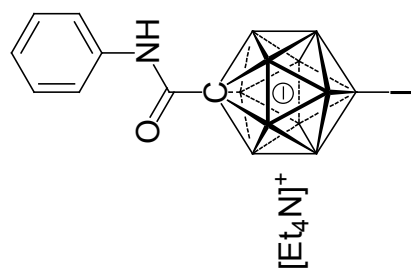

```

Current Data Parameters
NAME      1569-I-SS-phenyl
EXPNO     2
PROCNO    1

F2 - Acquisition Parameters
Date_     20180316
Time      23.04
INSTRUM   spect
PROBHD    5 mm PABBO BB-
PULPROG   zgpg30
TD         65536
SOLVENT   Acetone
NS         32
DS         0
SWH        32051.281 Hz
FIDRES     0.489064 Hz
AQ         1.0223616 sec
RG         203
DW         15.600 usec
DE         6.50 usec
TE         297.0 K
D1         1.00000000 sec
D11        0.03000000 sec

===== CHANNEL f1 =====
NUC1       11B
P1         13.10 usec
PLW1       95.00000000 W
SFO1       160.4615790 MHz

===== CHANNEL f2 =====
CFDPRG12  waltz16
NUC2       1H
PCPD2      80.00 usec
PLW2       19.00000000 W
PLW12     0.40639001 W
PLW13     0.26008999 W
SFO2       500.1325007 MHz

F2 - Processing parameters
SI         32768
SF         160.4615790 MHz
WDW        EM
SSB        0
LB         3.00 Hz
GB         0
PC         1.40
    
```

-11.41  
 -13.99  
 -16.71

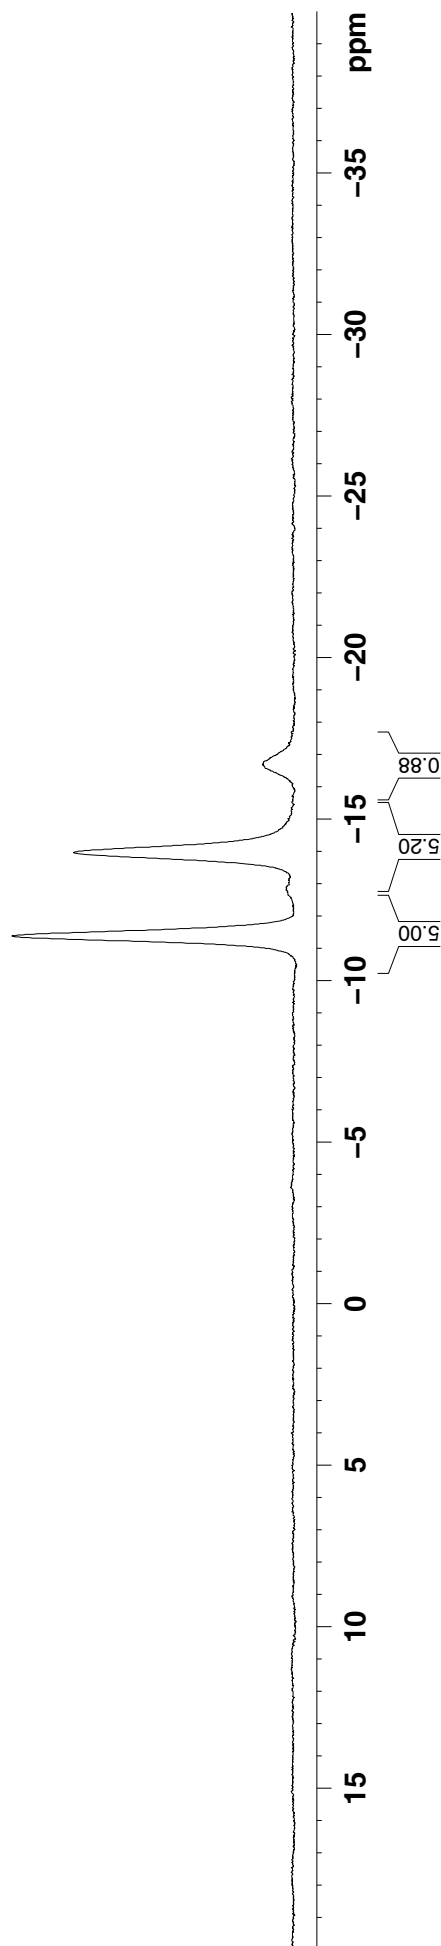

**[Et4N][12-I-CB11H10-CONHC6H5], Ca. 30mg in acetone-d6  
13C{1H}, 125 MHz, T= 22 C**

```

Current Data Parameters
NAME      1095-I-Phenyl
EXPNO    4
PROCNO   1

F2 - Acquisition Parameters
Date_    20180202
Time     13.41
INSTRUM  spect
PROBHD   5 mm PABBO BB-
PULPROG  zgpg30
TD        65536
SOLVENT  Acetone
NS        1024
DS         4
SMH       37878.789 Hz
FIDRES    0.577984 Hz
AQ         0.8650752 sec
RG         203
DW         13.200 usec
DE         6.50 usec
TE        295.8 K
D1        1.50000000 sec
D11       0.03000000 sec

===== CHANNEL f1 =====
NUC1      13C
P1        10.50 usec
PLW1     95.0000000 W
SFO1     125.716224 MHz

===== CHANNEL f2 =====
CPDPRG2  waltz16
NUC2      1H
PCPD2    80.00 usec
PLW2     19.0000000 W
PLW12    0.40639001 W
PLW13    0.26008999 W
SFO2     500.1320005 MHz

F2 - Processing parameters
SI        32768
SF        125.7576846 MHz
WDW       EM
SSB       0
LB        3.00 Hz
GB         0
PC        1.40
    
```

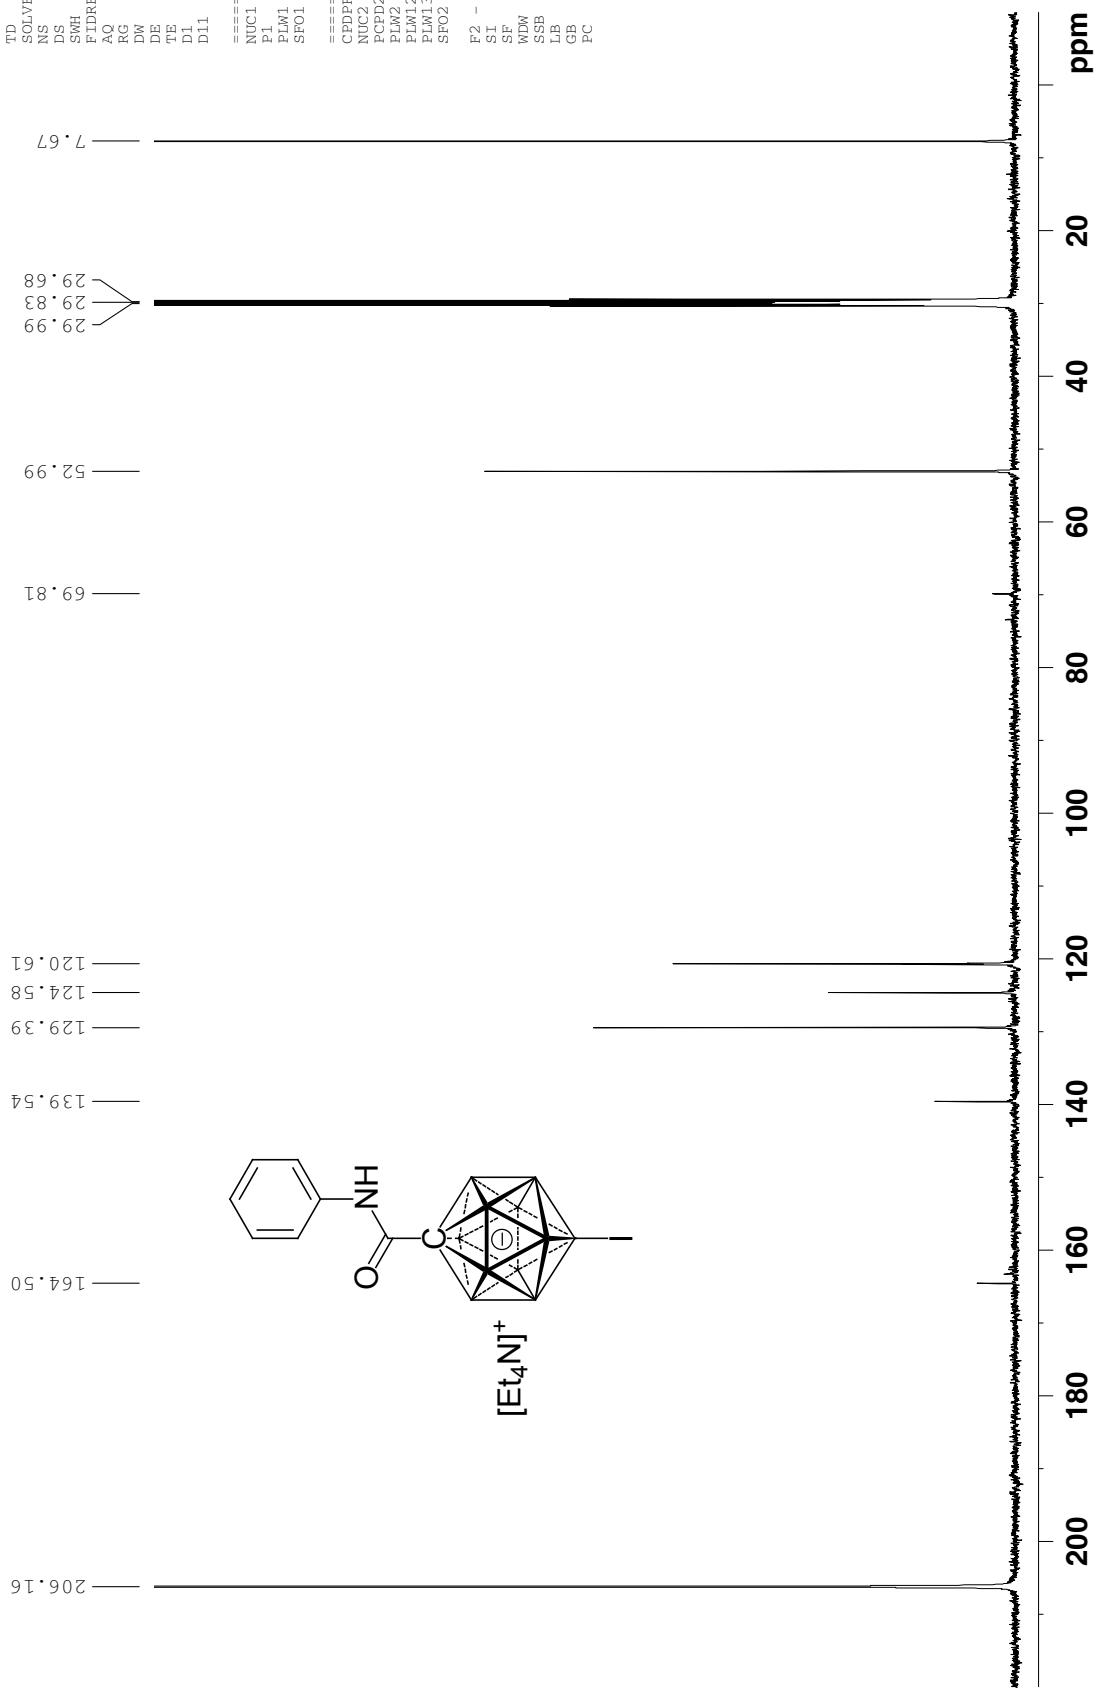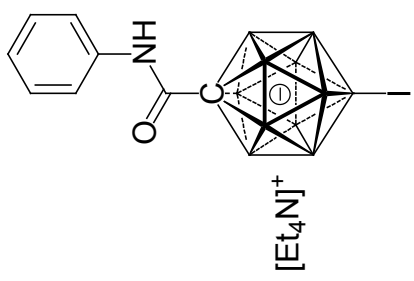

[Et<sub>4</sub>N][CB11H<sub>11</sub>-COOMe], Ca. 30mg in acetone-d<sub>6</sub> \*  
<sup>1</sup>H{<sup>11</sup>B}, 500 MHz, T=22 °C

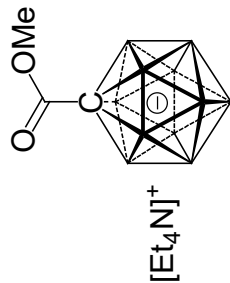

```

Current Data Parameters
NAME      1061-MeOH
EXPNO     1
PROCNO    1

F2 - Acquisition Parameters
Date_     20180201
Time      11.41
INSTRUM   spect
PROBHD    5 mm PABBO BB-
PULPROG   zgpg30
TD         65536
SOLVENT   Acetone
NS         16
DS         0
SWH        12500.000 Hz
FIDRES     0.190735 Hz
AQ         2.6214399 sec
RG         50.8
DM         40.000 usec
DE         6.50 usec
TE         295.7 K
D1         5.00000000 sec
D11        0.03000000 sec

===== CHANNEL f1 =====
NUC1       1H
P1         11.70 usec
PL1        19.00000000 W
SFO1       500.1355009 MHz

===== CHANNEL f2 =====
CPDPRG2    garrp
NUC2       11B
P2         100.10 usec
PL2        95.00000000 W
SFO2       160.4615690 MHz

F2 - Processing parameters
SI         32768
SF         500.1300104 MHz
WDW        EM
SSB        0
LB         0
GB         0
PC         1.00
  
```

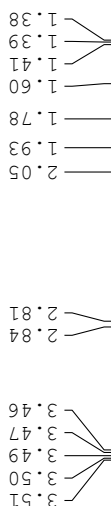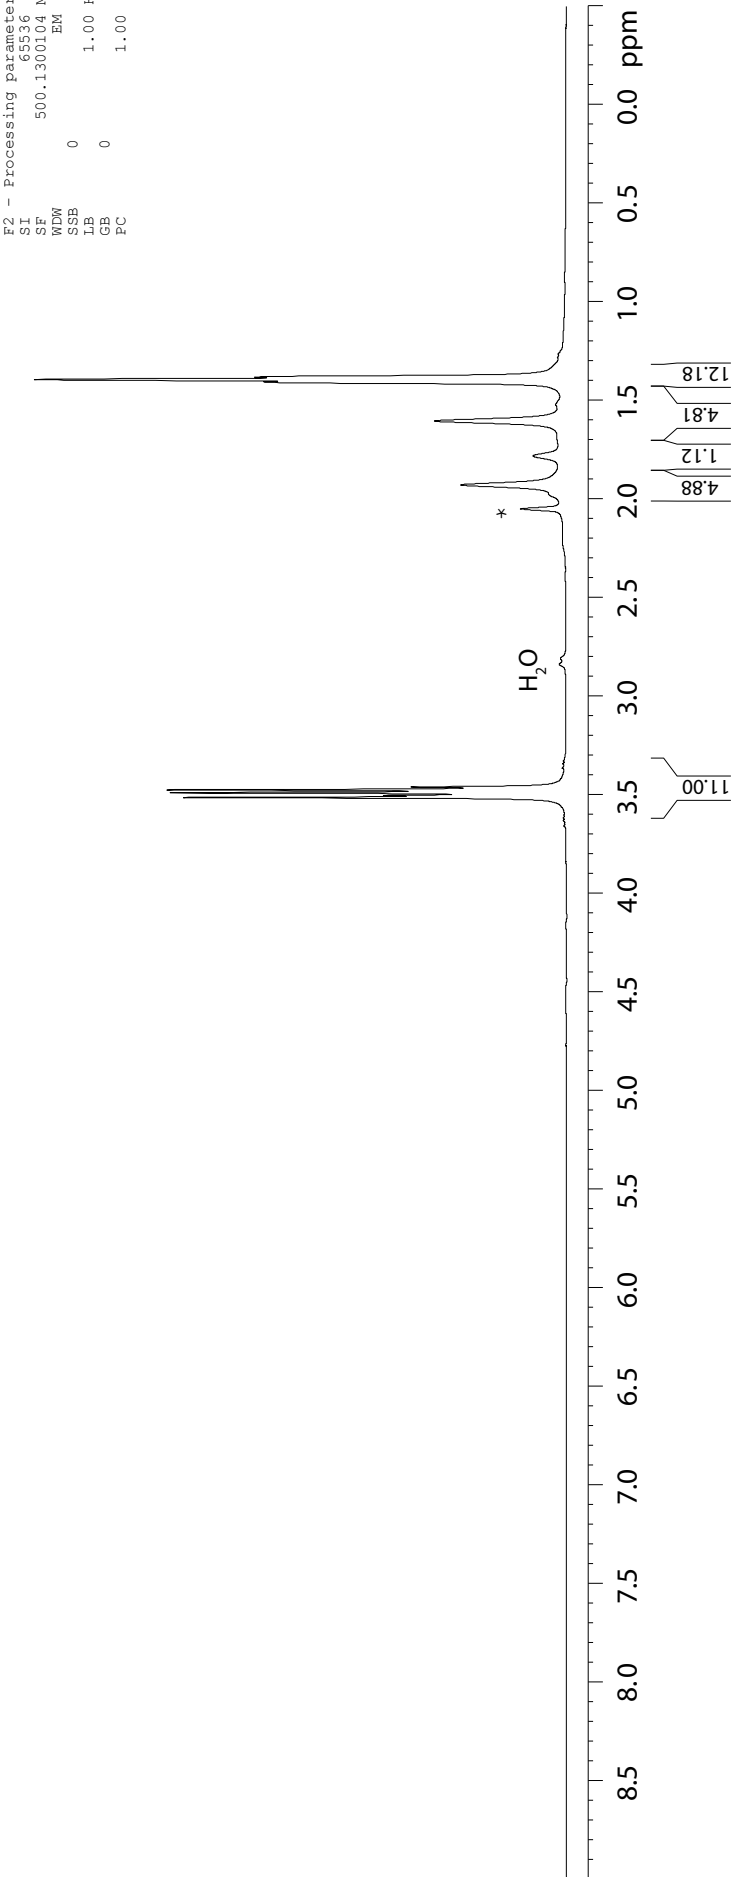

[Et<sub>4</sub>N][CB11H<sub>11</sub>-COOMe], Ca. 30mg in acetone-d<sub>6</sub>  
11B, 160 MHz, T = 22 C

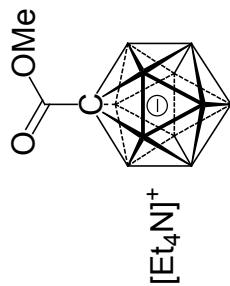

Current Data Parameters  
NAME 1061-MeOH  
EXPNO 2  
PROCNO 1

F2 - Acquisition Parameters  
Date\_ 20180201  
Time 11.43  
INSTRUM spect  
PROBHD 5 mm PABBO BB-  
PULPROG zg30  
TD 64098  
SOLVENT Acetone  
NS 32  
DS 0  
SMH 32051.281 Hz  
FIDRES 0.500036 Hz  
AQ 0.9999288 sec  
RG 203  
DM 15.600 usec  
DE 6.50 usec  
TE 295.3 K  
D1 1.00000000 sec

==== CHANNEL f1 =====  
NUC1 11B  
P1 13.10 usec  
PLM1 95.0000000 W  
SFO1 160.4615792 MHz

F2 - Processing Parameters  
SI 32768  
SF 160.4615790 MHz  
WDW EM  
SSB 0  
LB 10.00 Hz  
GB 0  
PC 1.40

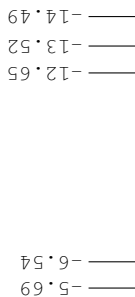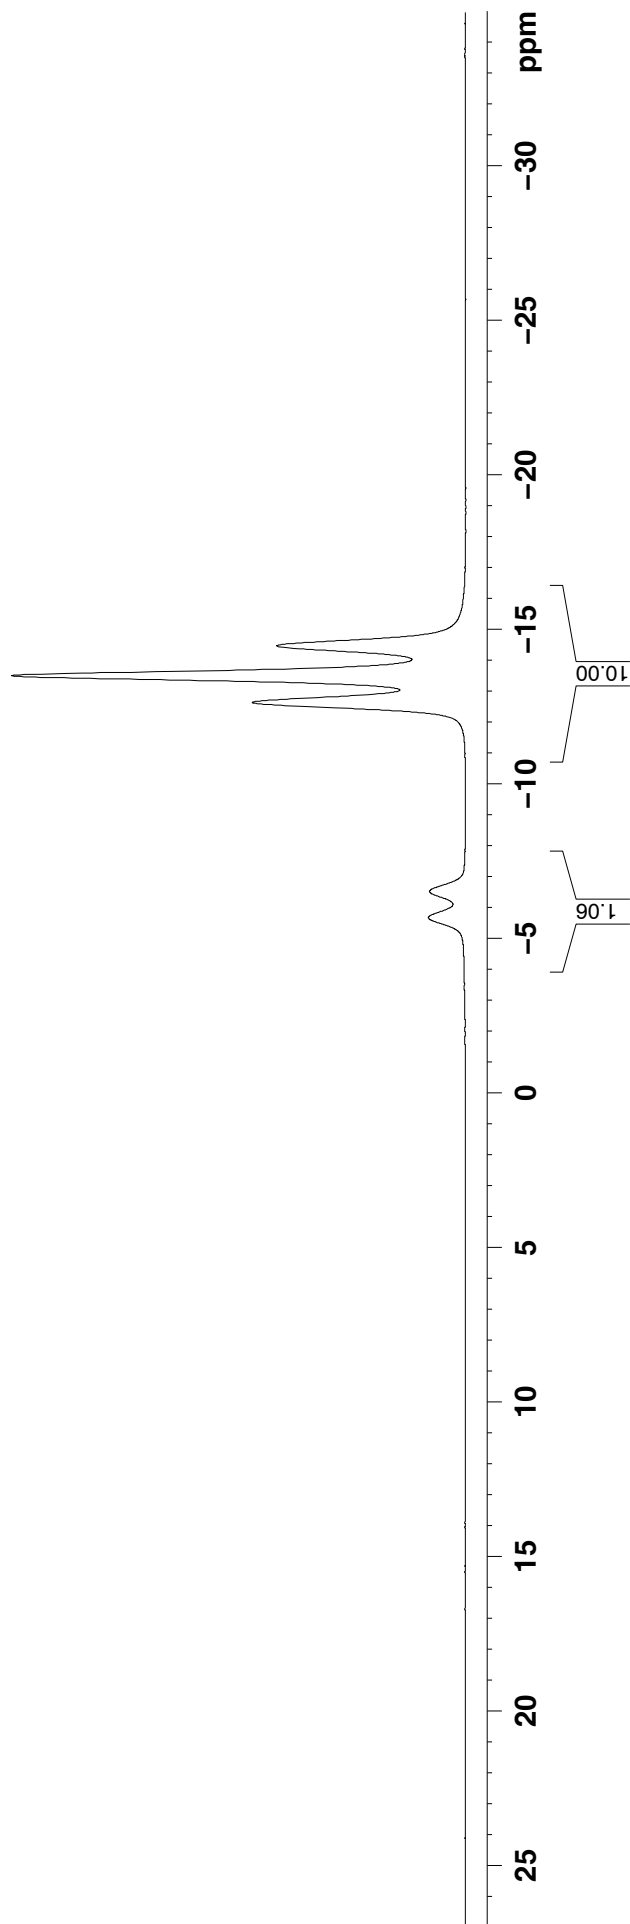

**[Et<sub>4</sub>N][CB11H<sub>11</sub>-COOMe], Ca. 30mg in acetone-d<sub>6</sub>  
11B{1H}, 160 MHz, T = 22 C**

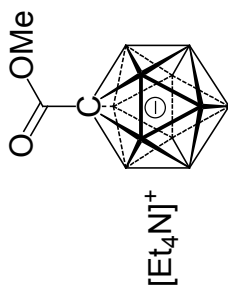

```

Current Data Parameters
NAME      1061-MeOH
EXPNO     3
PROCNO    1

F2 - Acquisition Parameters
Date_     20180201
Time     11.45
INSTRUM  spect
PROBHD   5 mm PABBO BB-
PULPROG  zgpg30
TD       65536
SOLVENT  Acetone
NS       32
DS       0
SMH      32051.281 Hz
FIDRES   0.489064 Hz
AQ       1.0223616 sec
RG       203
DW       15.600 usec
DE       6.50 usec
TE       295.6 K
D1       1.00000000 sec
D11      0.03000000 sec

===== CHANNEL f1 =====
NUC1      11B
P1        13.10 usec
PL1       95.00000000 W
SFO1      160.4615790 MHz

===== CHANNEL f2 =====
CPDPRG2  wait16
NUC2      1H
PCPD2     80.00 usec
PLPD2    19.00000000 W
PLM2      0.40639001 W
PLM3      0.26008999 W
SFO2      500.1325007 MHz

F2 - Processing parameters
SI        32768
SF        160.4615790 MHz
WDW       EM
SSB       0
LB        1.00 Hz
GB        0
PC        1.40
    
```

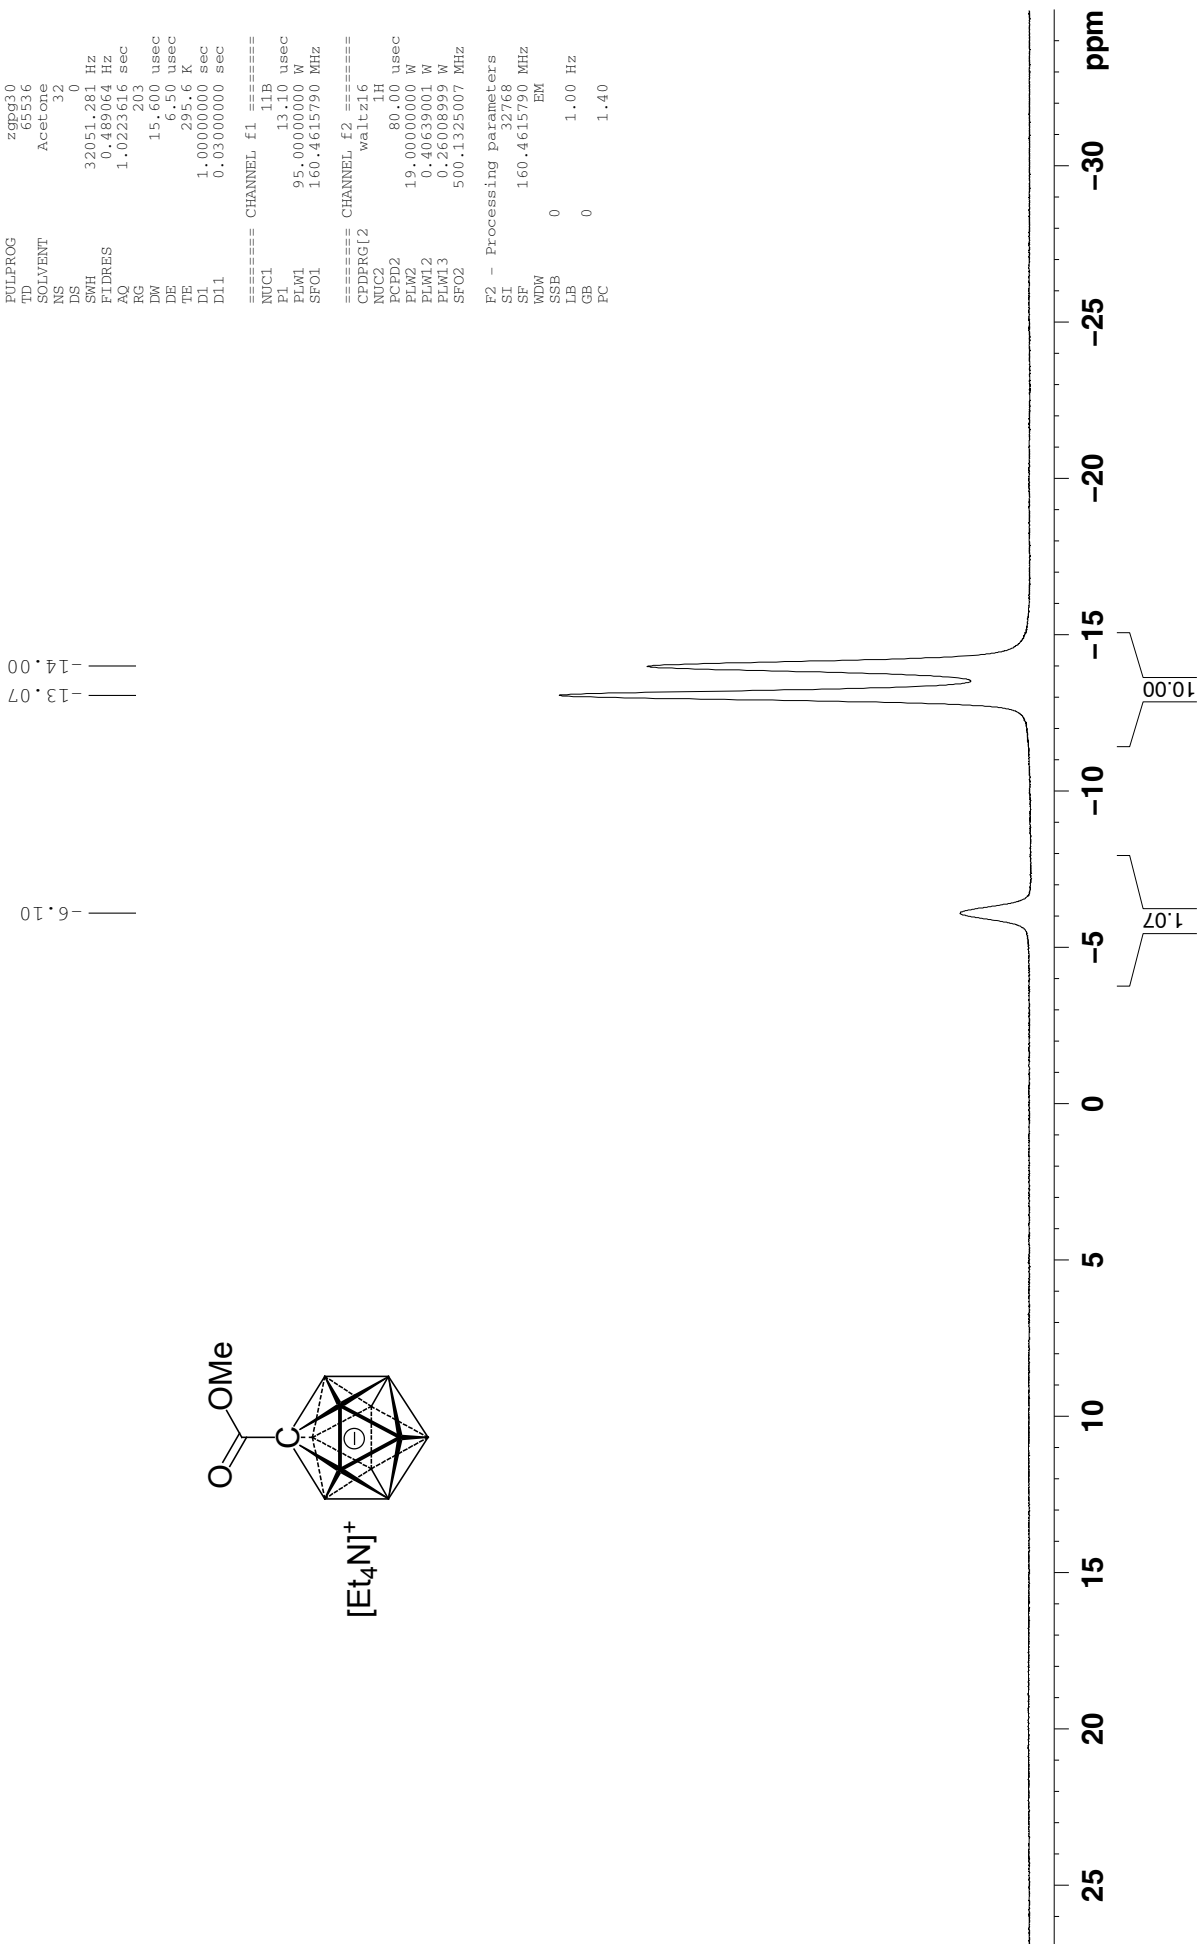

**[Et<sub>4</sub>N][CB11H<sub>11</sub>-COOMe], Ca. 30mg in acetone-d<sub>6</sub>  
<sup>13</sup>C{<sup>1</sup>H}, 125 MHz, T = 22 C**

Current Data Parameters  
 NAME 1061-MeOH  
 EXPNO 4  
 PROCNO 1

F2 - Acquisition Parameters  
 Date\_ 20180201  
 Time 12.27  
 INSTRUM spect  
 PROBHD 5 mm PABBO BB-  
 PULPROG zgpg30  
 TD 65536  
 SOLVENT Acetone  
 NS 1024  
 DS 4  
 SMH 37878.789 Hz  
 FIDRES 0.577984 Hz  
 AQ 0.8650752 sec  
 RG 203  
 DW 13.200 usec  
 DE 6.50 usec  
 TE 296.0 K  
 D1 1.50000000 sec  
 D11 0.03000000 sec

==== CHANNEL f1 =====  
 NUC1 <sup>13</sup>C  
 P1 10.50 usec  
 PLW1 95.0000000 W  
 SFO1 125.716224 MHz

==== CHANNEL f2 =====  
 CPDPRG2 waltz16  
 NUC2 <sup>1</sup>H  
 PCPD2 80.00 usec  
 PLW2 19.0000000 W  
 PLW12 0.40639001 W  
 PLW13 0.26008999 W  
 SFO2 500.1320005 MHz

F2 - Processing Parameters  
 SI 32768  
 SF 125.7576844 MHz  
 WDW EM  
 SSB 0  
 LB 3.00 Hz  
 GB 0  
 EC 1.40

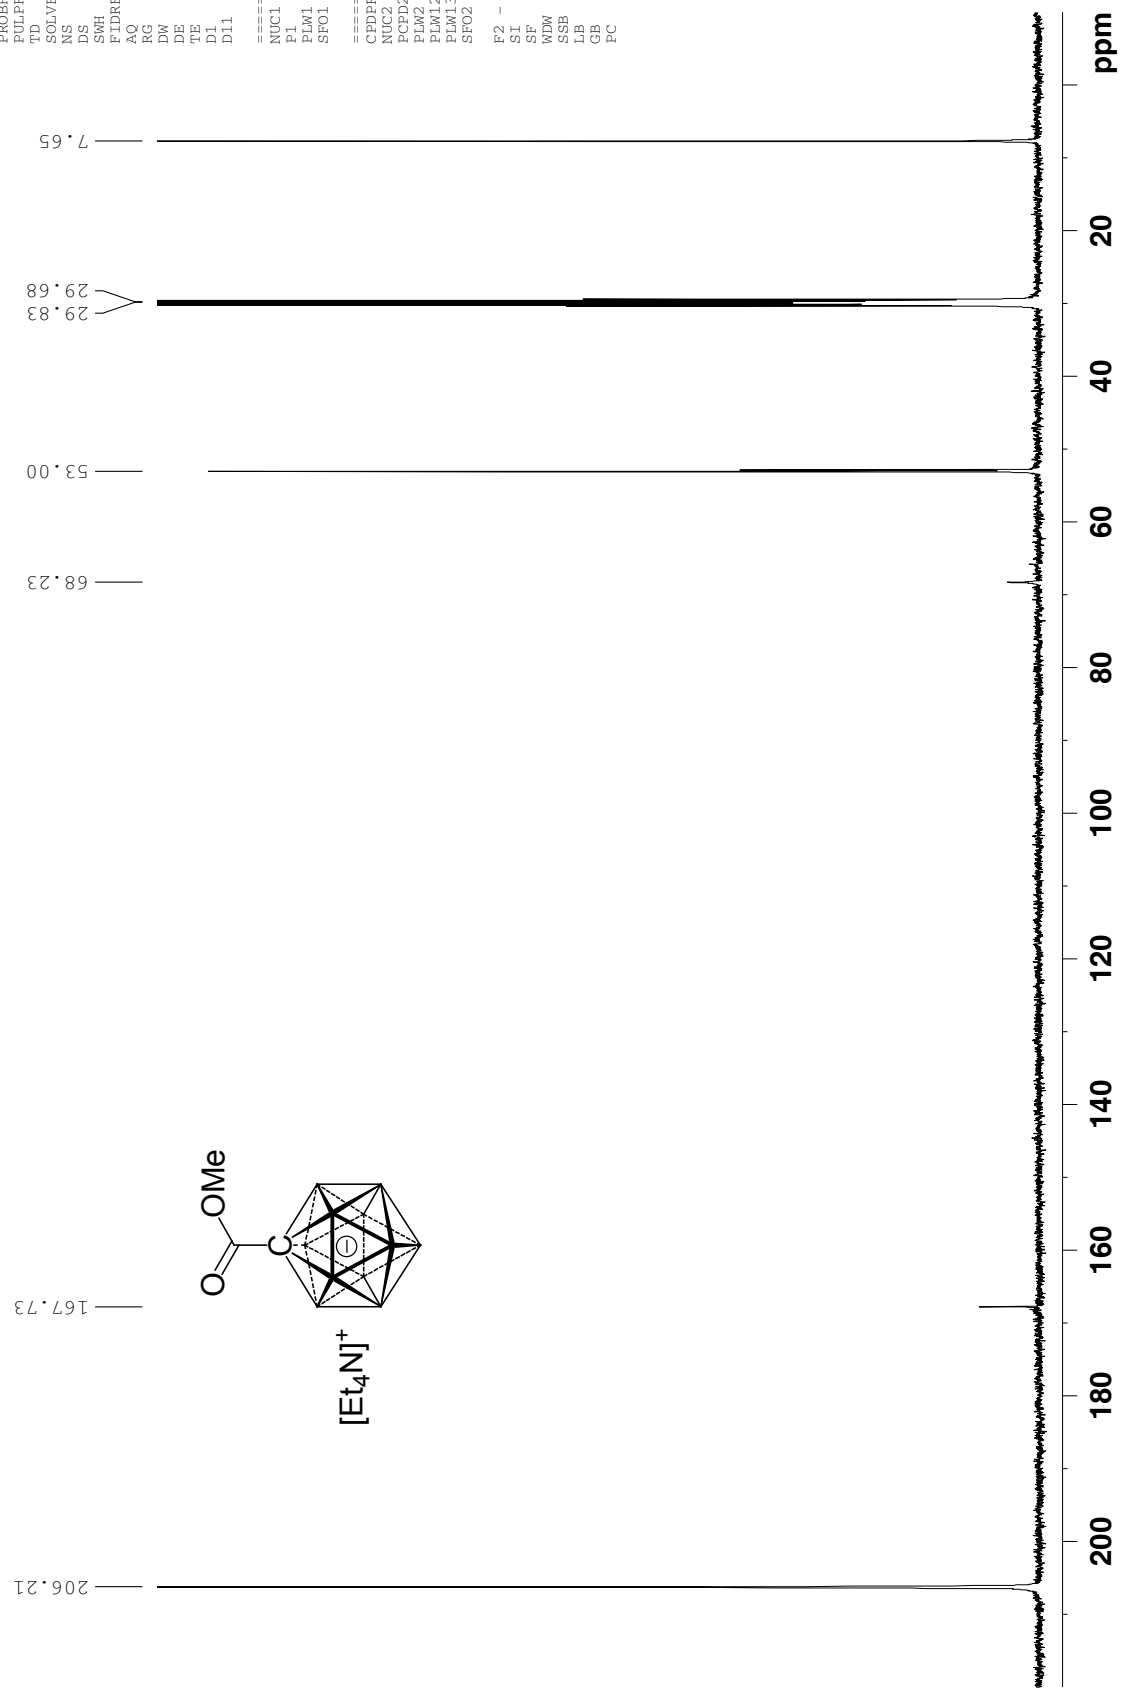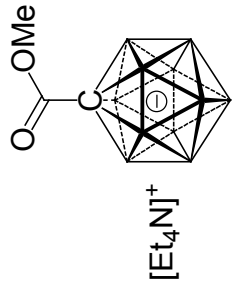



[Et4N][CB11H11-CH2-N(pyrrolidine)] in acetone-d6\*  
 1H{11B} NMR, 500 MHz, T = 22

Current Data Parameters  
 NAME 20180317\_1566-PY  
 EXPNO 1  
 PROCNO 1

F2 - Acquisition Parameters  
 Date\_ 20180316  
 Time\_ 22.43  
 INSTRUM spect  
 PROBHD 5 mm PABBO1 BB-  
 PULPROG zgpg30  
 TD 65536  
 SOLVENT Acetone  
 NS 10  
 DS 1  
 SWH 12500.000 Hz  
 FIDRES 0.190735 Hz  
 AQ 2.6214399 sec  
 RG 40.004  
 DW 40.00 usec  
 DE 6.50 usec  
 TE 296.3 K  
 D1 5.0000000 sec  
 D11 0.03000000 sec

==== CHANNEL f1 =====  
 NUC1 1H  
 F1 11.70 usec  
 PLW1 19.0000000 W  
 SFO1 500.1335009 MHz

==== CHANNEL f2 =====  
 CPDPRG2 garp  
 NUC2 11B  
 F2 100.00 usec  
 PLW2 95.0000000 W  
 PLW12 1.63030005 W  
 SFO2 160.4615690 MHz

F2 - Processing parameters  
 SI 65536  
 SF 500.1300101 MHz  
 WDW EM  
 SSB 0  
 LB 1.00 Hz  
 GB 0  
 FC 1.00

1.66  
 1.77  
 2.05  
 2.10  
 2.11  
 2.12  
 2.13  
 2.18  
 2.20  
 2.21  
 3.08  
 3.31  
 3.32  
 3.33  
 3.34  
 3.34  
 3.35  
 3.72  
 3.73  
 3.97  
 3.98  
 3.99  
 4.00

7.82

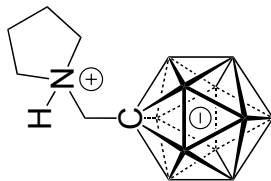

grease  
 H<sub>2</sub>O

\*

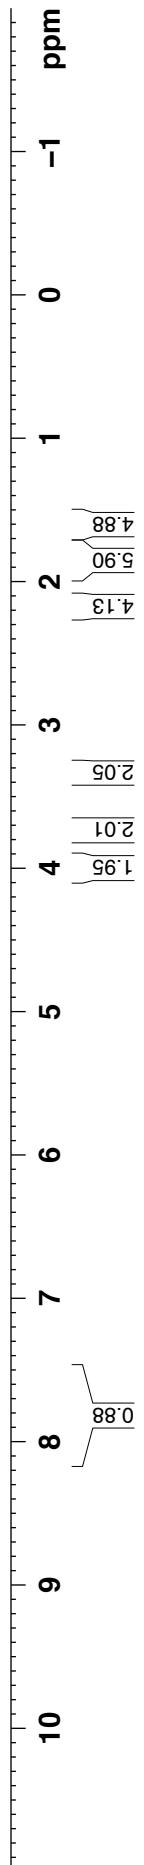

**[H]ICB11H11-CH2NC4H8], Ca. 30mg in acetone-d6  
11B, 128 MHz, T = 22 C**

Current Data Parameters  
NAME 20180405-zhk-Py-re  
EXFNO 2  
PROCNO 1

F2 - Acquisition Parameters  
Date\_ 20180407  
Time 0.33  
INSTRUM spect  
PROBHD 5 mm PABBO BB/  
PULPROG zg  
TD 65536  
SOLVENT Acetone  
NS 128  
DS 4  
SWH 25510.203 Hz  
FIDRES 0.389255 Hz  
AQ 1.2845056 sec  
RG 193.34  
DM 19.600 usec  
DE 6.50 usec  
TE 296.1 K  
D1 1.00000000 sec  
TDO 1

==== CHANNEL f1 =====  
NUCL 11B  
P1 9.93 usec  
PLWL 52.9659960 W  
SFOL 128.3776052 MHz

F2 - Processing parameters  
SI 32768  
SF 128.3776050 MHz  
WDW EM  
SSB 0  
LB 1.00 Hz  
GB 0  
PC 1.40

— 14.65  
— 12.97  
— 11.85  
— 7.88  
— 6.81

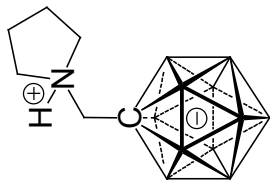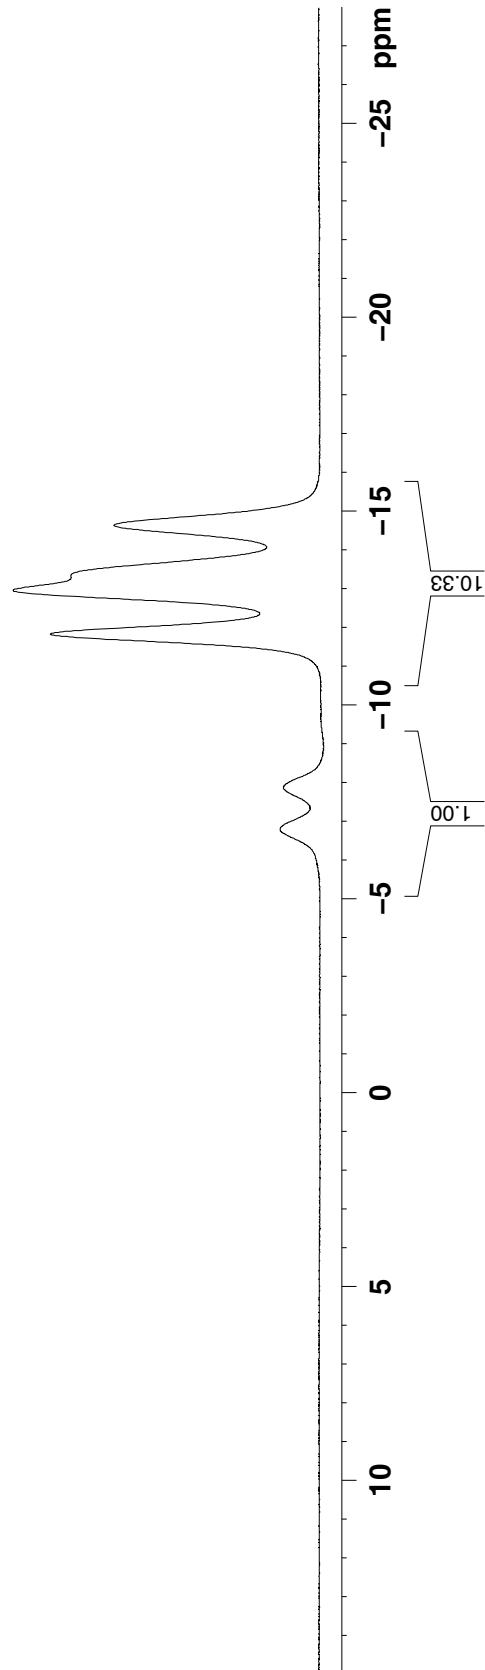

**[<sup>1</sup>H]ICB11H11-CH<sub>2</sub>NC<sub>4</sub>H<sub>8</sub>, Ca. 30mg in acetone-d<sub>6</sub>  
11B{1H}, 128 MHz, T = 22 C**

Current Data Parameters  
 NAME 20180405-zhk-Py-re  
 EXFNO 1  
 PROCNO 1

F2 - Acquisition Parameters  
 Date\_ 20180407  
 Time 0.27  
 INSTRUM spec  
 PROBHD 5 mm PABBO BB/  
 PULPROG zgpg30  
 TD 65536  
 SOLVENT Acetone  
 NS 128  
 DS 4  
 SWH 25510.203 Hz  
 FIDRES 0.389255 Hz  
 AQ 1.2845056 sec  
 RG 193.34  
 DW 19.600 usec  
 DE 6.50 usec  
 TE 296.8 K  
 D1 1.0000000 sec  
 D1.1 0.0300000 sec  
 TDO 1

===== CHANNEL f1 =====  
 NUC1 11B  
 P1 9.93 usec  
 PLW1 52.9659960 W  
 SF01 128.3776050 MHz

===== CHANNEL f2 =====  
 CPDPRG[2] waltz16  
 NUC2 1H  
 PCPD2 80.00 usec  
 PLW2 12.5000000 W  
 PLW12 0.43945000 W  
 PLW13 0.28125000 W  
 SF02 400.1320007 MHz

F2 - Processing parameters  
 SI 32768  
 SF 128.3776050 MHz  
 WDW EM  
 SSB 0  
 LB 1.00 Hz  
 GB 0  
 FC 1.40

— 14.08  
 — 12.39  
 — 7.37

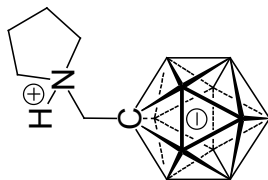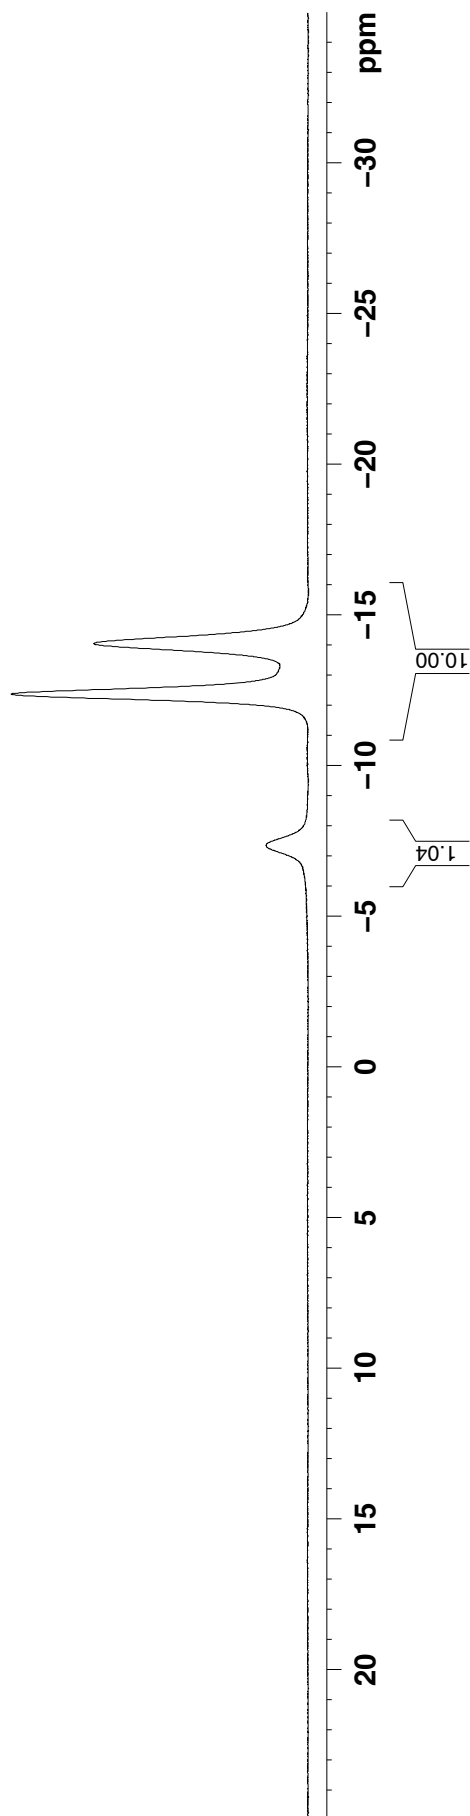

[Et4N][CB11H11-CH2-N(pyrrolidinium)] in acetone-d6\*  
 13C{1H} NMR, 500 MHz, T = 22

```

Current Data Parameters
NAME      20180209-zhk-py-re
EXPNO    4
PROCNO   1

F2 - Acquisition Parameters
Date_    20180209
Time     16.40
INSTRUM spect
PROBHD   5 mm PABBO BB/
PULPROG zgpg30
TD       65536
SOLVENT  Acetone
NS       512
DS       4
SWH      24038.461 Hz
FIDRES   0.366798 Hz
AQ       1.3631488 sec
RG       205.44
DW       20.800 usec
DE       6.50 usec
TE       298.1 K
D1       2.00000000 sec
D11      0.03000000 sec
TD0      1

=====
CHANNEL f1 =====
SFO1     100.6228293 MHz
NUC1     13C
P1       9.50 usec
PLW1     68.00000000 W

=====
CHANNEL f2 =====
SFO2     400.1316005 MHz
NUC2     1H
PCPD2    waltz16
PCPD2    90.00 usec
PLW2     17.00000000 W
PLW12    0.18941000 W
PLW13    0.15343000 W

F2 - Processing parameters
SI       32768
SF       100.6126813 MHz
WDW      EM
SSB      0
LB       3.00 Hz
GB       0
PC       1.40
    
```

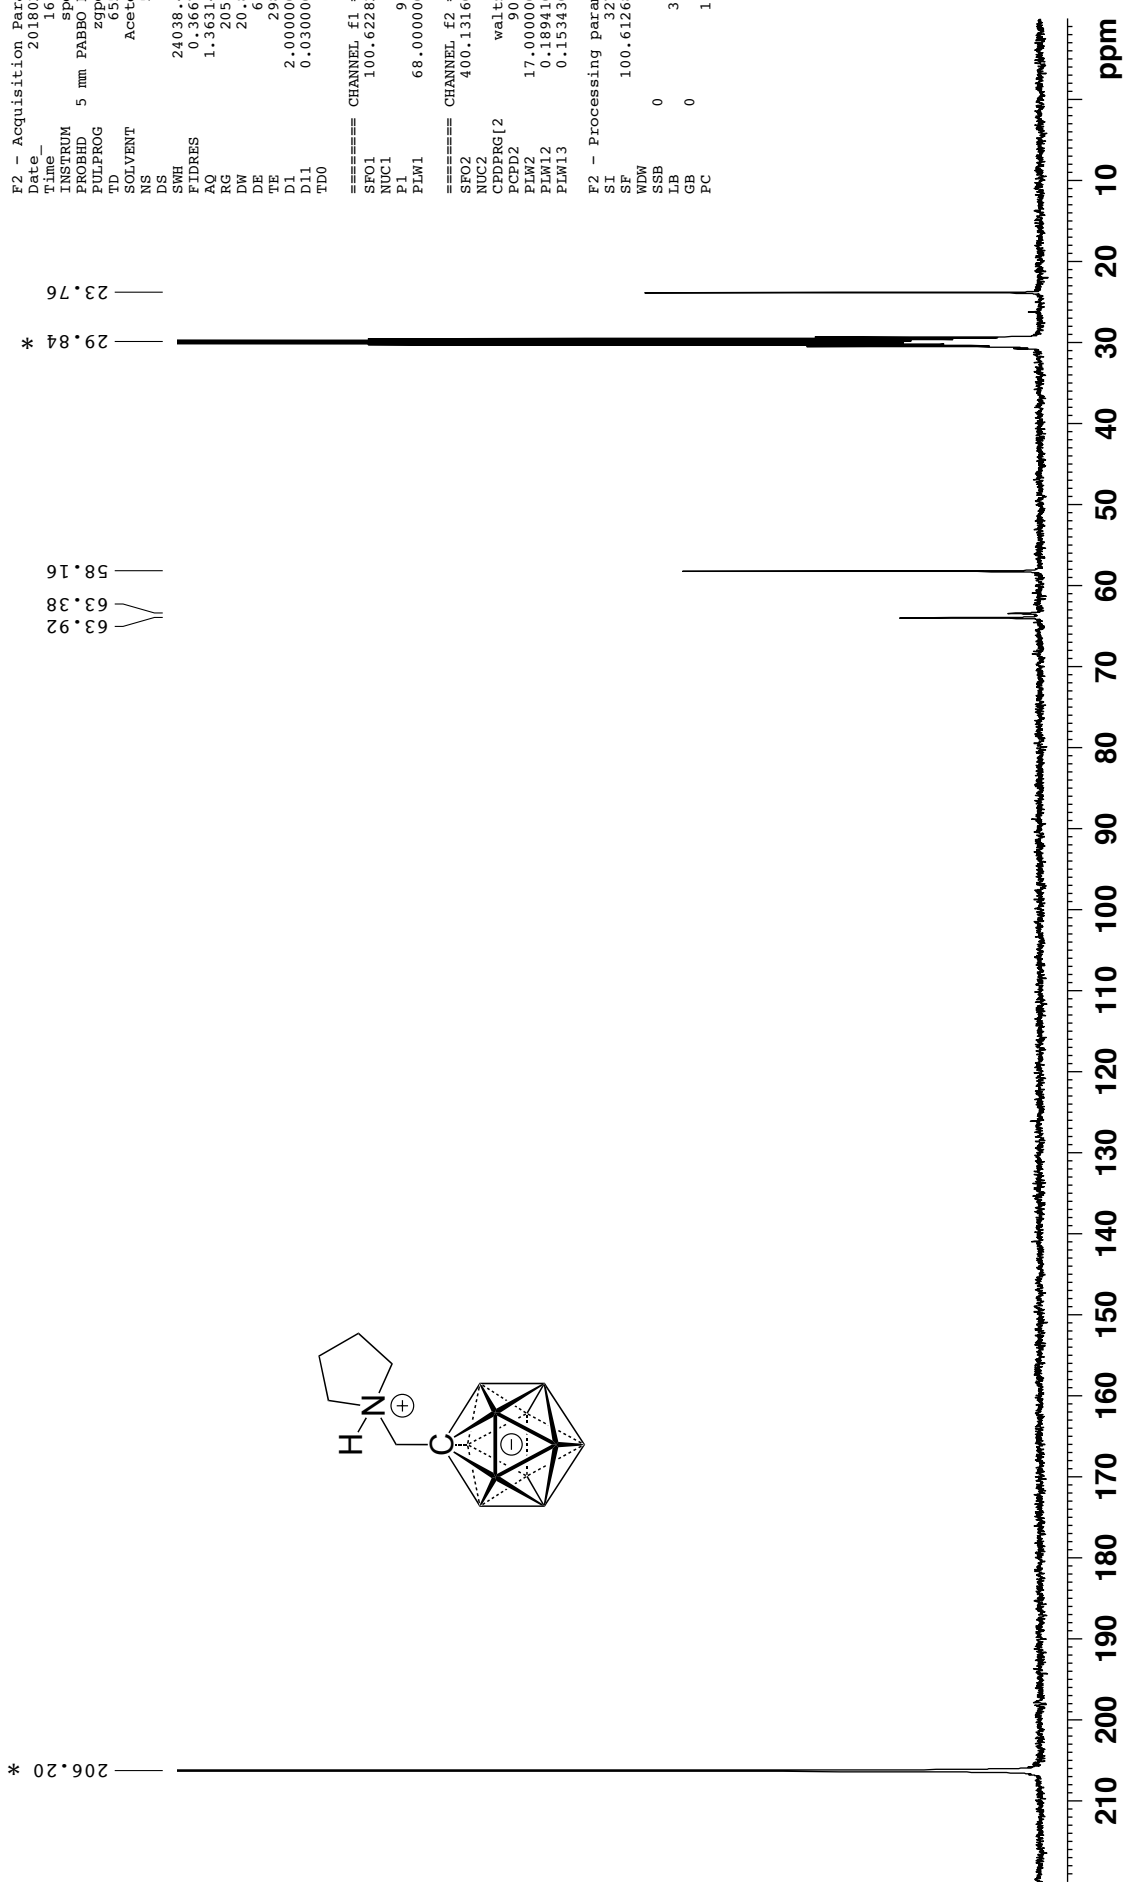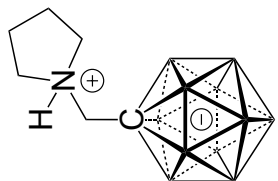

**[Et4N][CB11H11-CH2-N(piperidine)] in acetone-d6\***  
**1H{11B} NMR, 500 MHz, T = 22**

```

Current Data Parameters
NAME      20180317_1567-F1
EXPNO     1
PROCNO    1

F2 - Acquisition Parameters
Date_     20180316
Time     22.51
INSTRUM   spect
PROBHD    5 mm PABBO BB
PULPROG   zgpg30
TD         65536
SOLVENT   Acetone
NS         16
DS         4
SWH        12500.000 Hz
FIDRES     0.190733 Hz
AQ         2.621439 sec
RG         45.2
DW         40.000 usec
DE         6.50 usec
TE         296.3 K
D1         5.00000000 sec
D11        0.03000000 sec

===== CHANNEL f1 =====
NUC1       1H
P1         11.70 usec
PLW1       19.00000000 W
SFO1       500.1335009 MHz

===== CHANNEL f2 =====
CPDPRG2    garp
NUC2       11B
P2         100.00 usec
PLW2       95.00000000 W
SFO2       1.63030005 W
SFO2       160.4615690 MHz

F2 - Processing parameters
SI         65536
SF         500.1300101 MHz
WDW        EM
SSB        0
LB         1.00 Hz
GB         0
PC         1.00
    
```

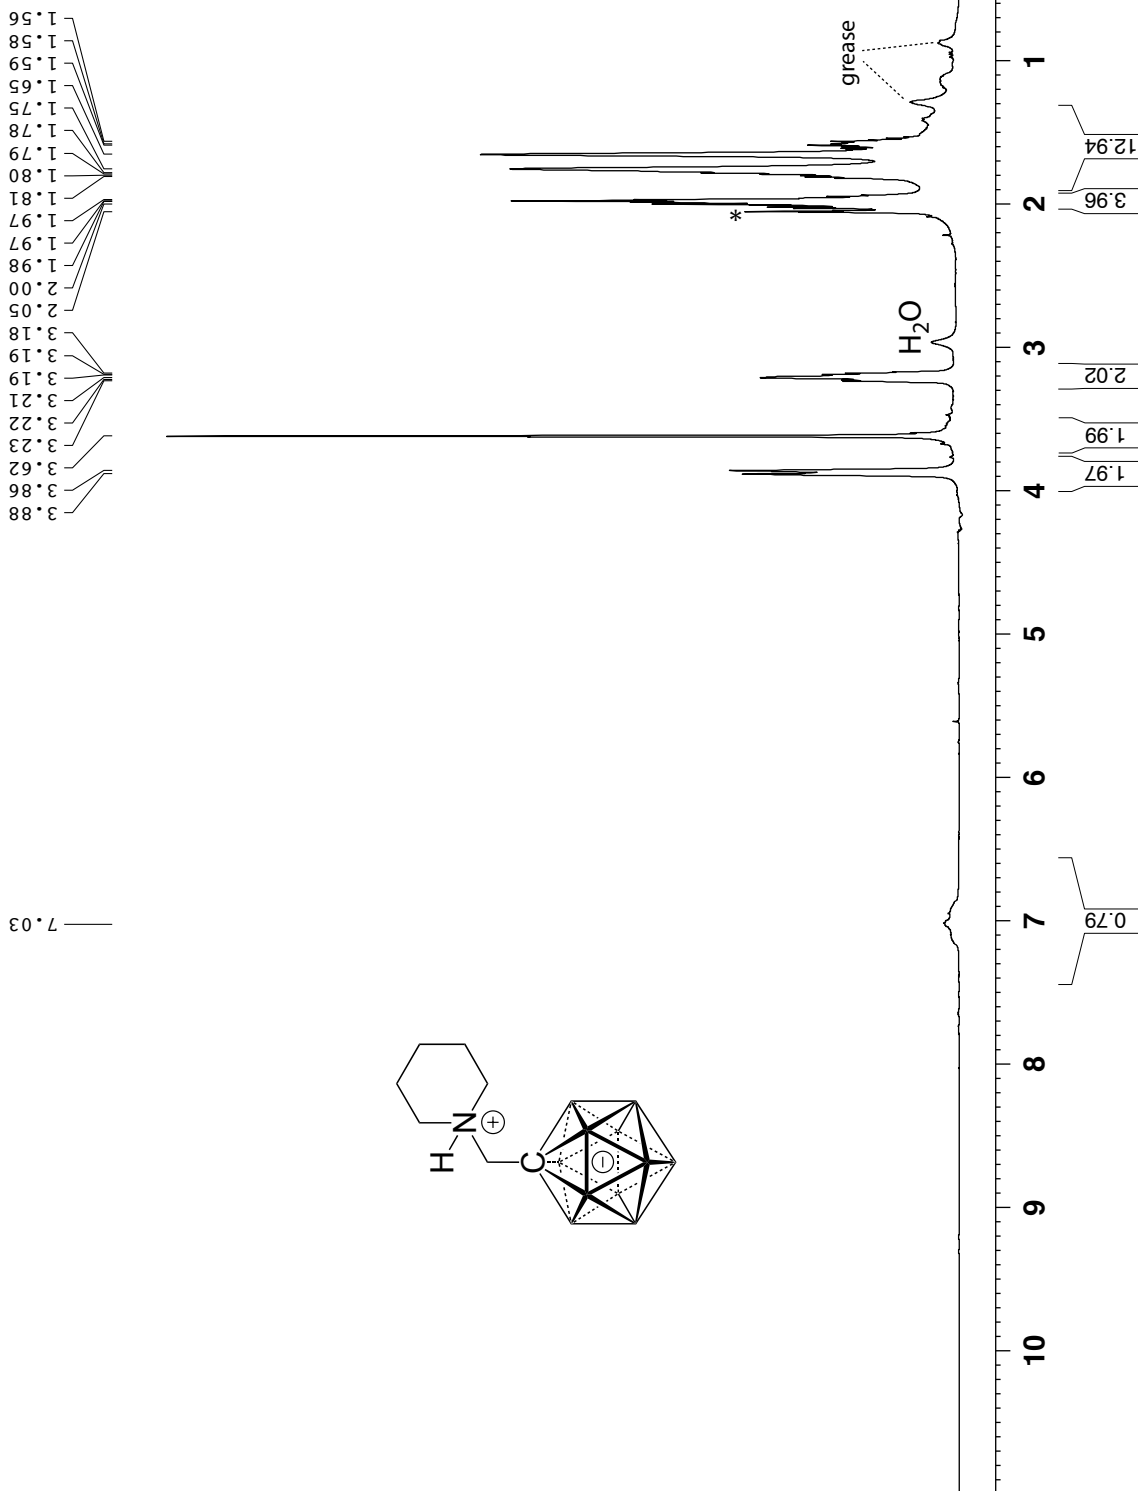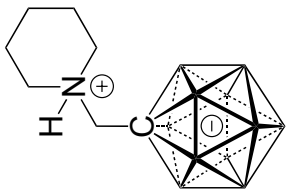

20180316-zhk-PI-re  
11B, 128 MHz, T = 22 C

```

Current Data Parameters
NAME      20180316-zhk-PI-re
EXPNO    2
PROCNO   1

F2 - Acquisition Parameters
Date_    20180321
Time     13.54
INSTRUM  spect
PROBHD   5 mm PABBO BB/
PULPROG  zg
TD        65536
SOLVENT  Acetone
NS        128
DS         4
SWH       25510.203 Hz
FIDRES    0.389255 Hz
AQ         1.2845056 sec
RG         193.34
DW         19.600 usec
DE         6.50 usec
TE         294.1 K
D1         1.0000000 sec
TD0        1

===== CHANNEL f1 =====
NUC1      11B
P1         9.93 usec
PLW1      52.9659960 W
SFO1      128.3776052 MHz

F2 - Processing parameters
SI         32768
SF         128.3776050 MHz
WDW        EM
SSB         0
LB         5.00 Hz
GB         0
PC         1.40
    
```

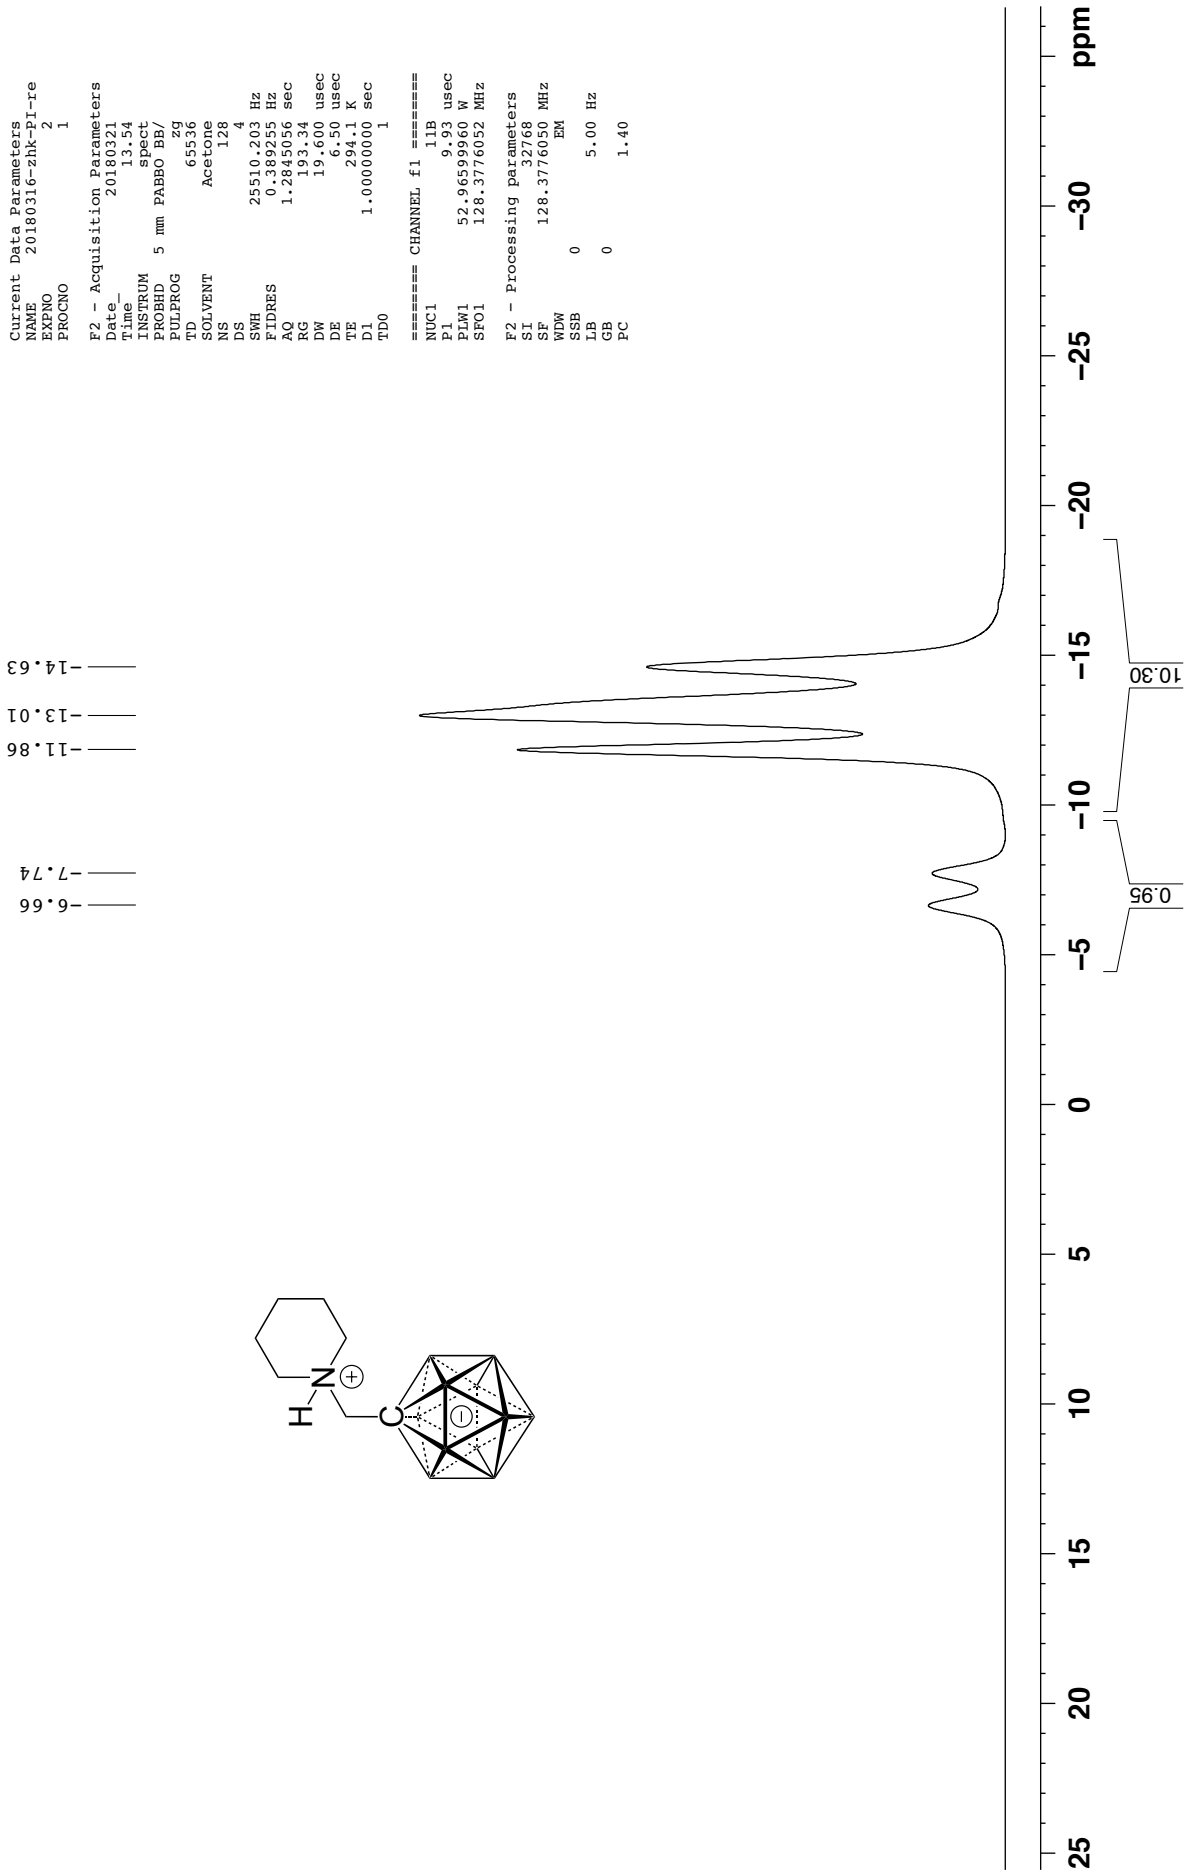

20180316-zhk-PI-re  
 11B{1H}, 128 MHz, T=ϕ2

Current Data Parameters  
 NAME 20180316-zhk-PI-re  
 EXPNO 1  
 PROCNO 1

F2 - Acquisition Parameters  
 Date\_ 20180321  
 Time 13.48  
 INSTRUM spect  
 PROHD 5 mm PABBO BB/  
 PULPROG zgpg30  
 TD 65536  
 SOLVENT Acetone  
 NS 128  
 DS 4  
 SWH 25510.203 Hz  
 FIDRES 0.389255 Hz  
 AQ 1.2845056 sec  
 RG 193.34  
 DW 19.600 usec  
 DE 6.50 usec  
 TE 294.8 K  
 D1 1.00000000 sec  
 D11 0.03000000 sec  
 TDO 1

==== CHANNEL f1 =====  
 NUC1 11B  
 P1 9.93 usec  
 PLW1 52.9659960 W  
 SFO1 128.3776050 MHz  
 =====  
 CHANNEL f2 =====  
 CPDPRG2 waltz16  
 NUC2 1H  
 PCPD2 80.00 usec  
 PLW2 12.5000000 W  
 PLW12 0.43945000 W  
 PLW13 0.28125000 W  
 SFO2 400.1320007 MHz  
 F2 - Processing parameters  
 SI 32768  
 SF 128.3776050 MHz  
 WDW EM  
 SSB 0  
 LB 10.00 Hz  
 GB 0  
 PC 1.40

14.04  
 12.40  
 7.21

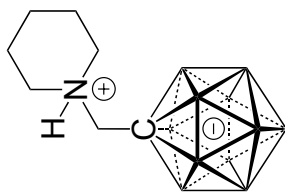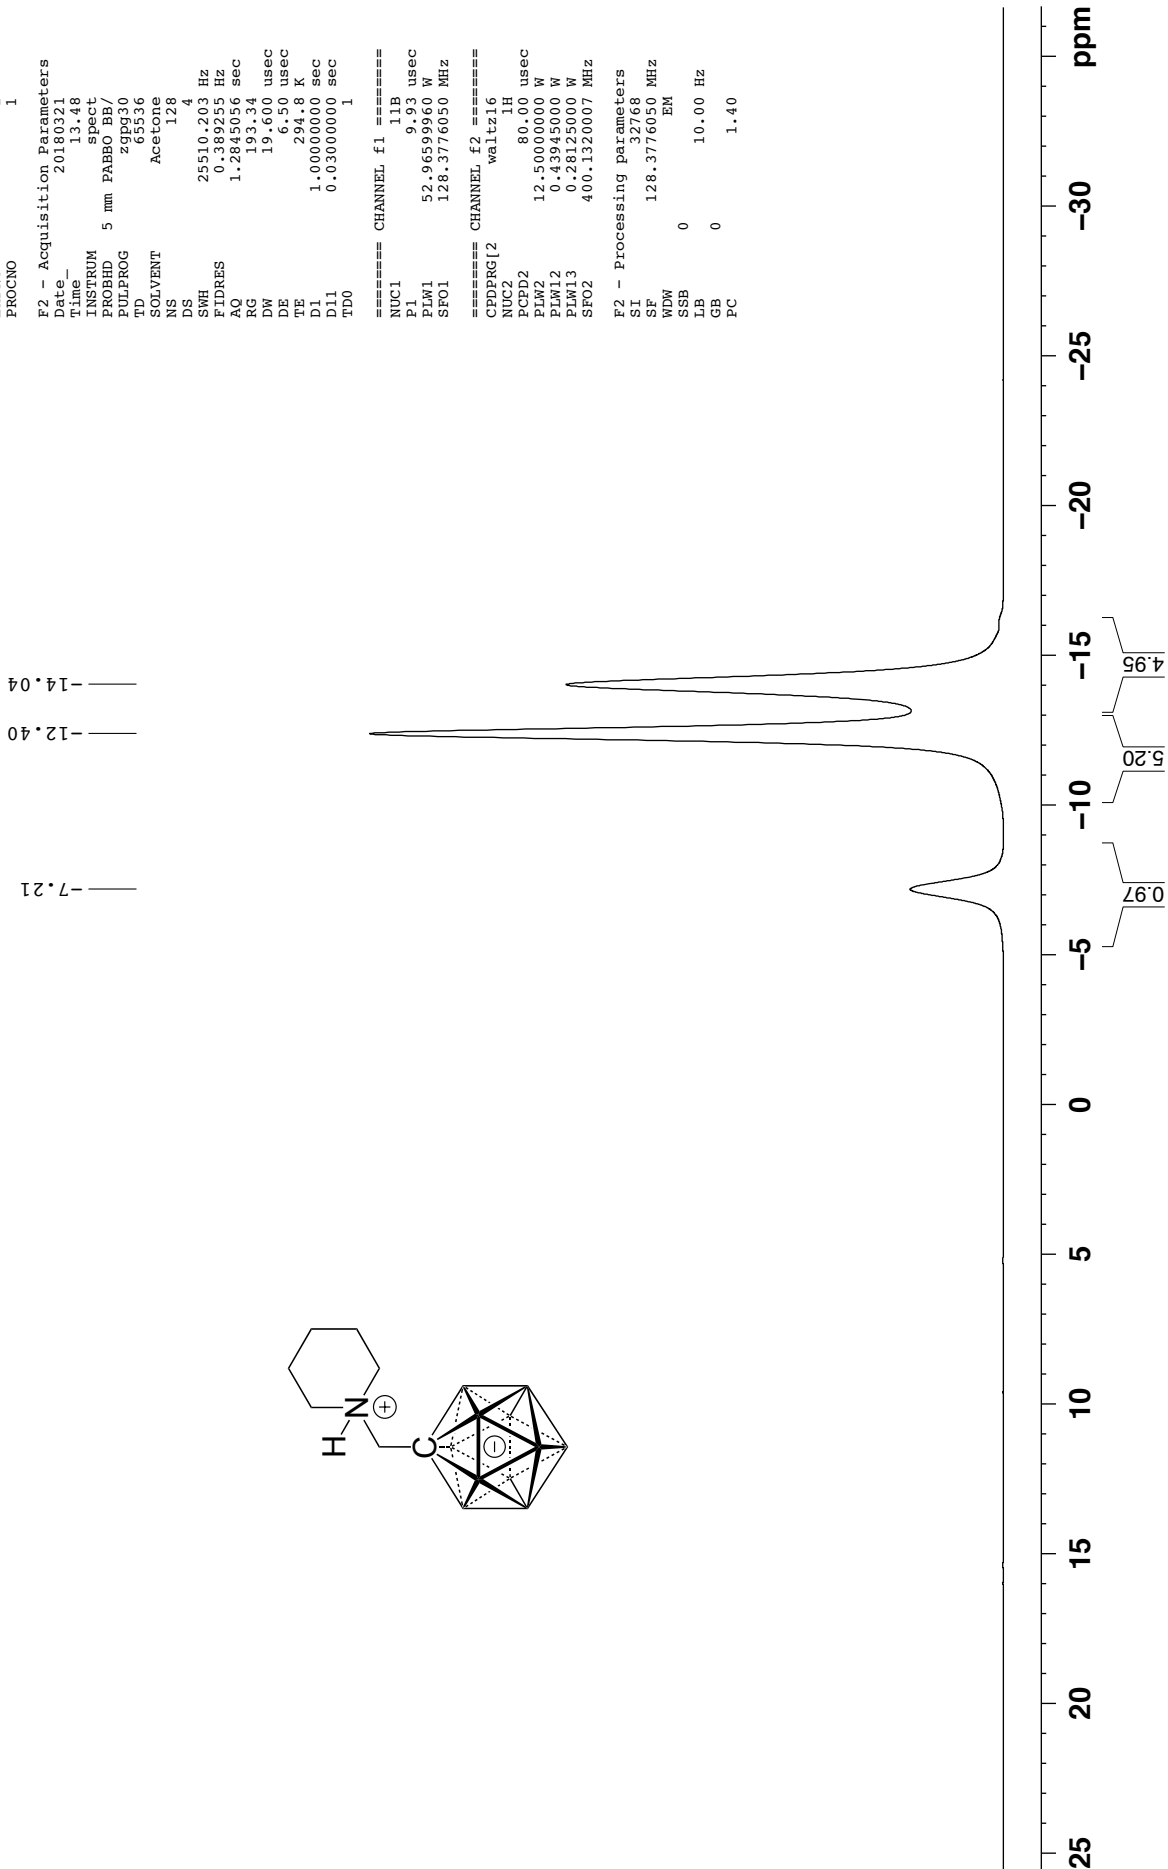

[Et4N][CB11H11-CH2-N(piperidine)] in acetone-d6\*  
 13C{1H} NMR, 500 MHz, T = 22

Current Data Parameters  
 NAME 20180209-zhk-pl-re  
 EXPNO 4  
 PROCNO 1

F2 - Acquisition Parameters  
 Date\_ 20180209  
 Time 15.54  
 INSTRUM spect  
 PROHD 5 mm PABBO BB/  
 PULPROG zgpg30  
 TD 65536  
 SOLVENT Acetone  
 NS 512  
 DS 4  
 SWH 24038.461 Hz  
 FIDRES 0.366798 Hz  
 AQ 1.3631488 sec  
 RG 205.44  
 DW 20.800 usec  
 DE 6.50 usec  
 TE 298.2 K  
 D1 2.0000000 sec  
 D11 0.0300000 sec  
 TD0 1

==== CHANNEL f1 =====  
 SF01 100.6228293 MHz  
 NUC1 13C  
 P1 9.50 usec  
 PLW1 68.0000000 W

==== CHANNEL f2 =====  
 SF02 400.1316005 MHz  
 NUC2 1H  
 CPDPRG2 waltz16  
 PCPD2 90.00 usec  
 PLW2 17.0000000 W  
 PLW12 0.18941000 W  
 PLW13 0.15343000 W

F2 - Processing parameters  
 SI 32768  
 SF 100.6126836 MHz  
 WDW EM  
 SSB 0  
 LB 3.00 Hz  
 GB 0  
 PC 1.40

64.60  
 62.61  
 56.69  
 29.84 \*  
 22.82  
 21.98

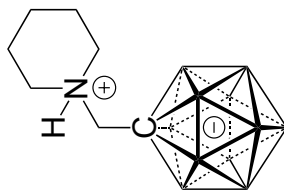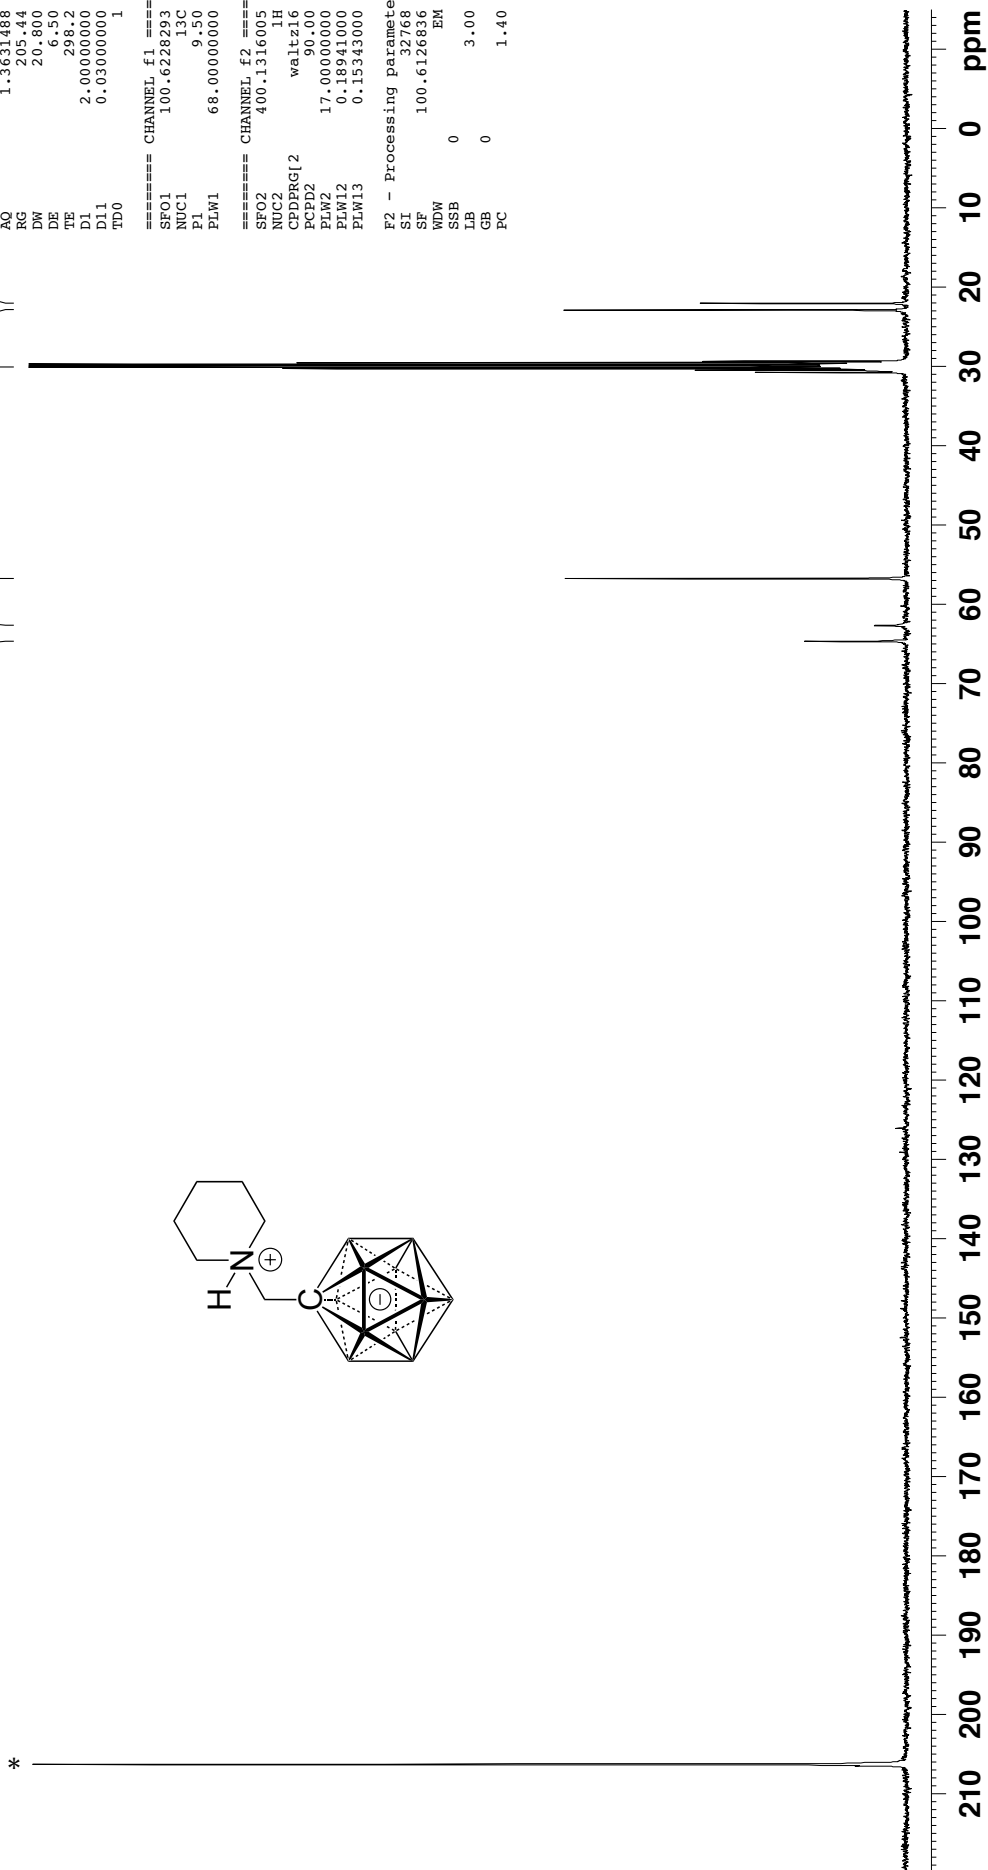



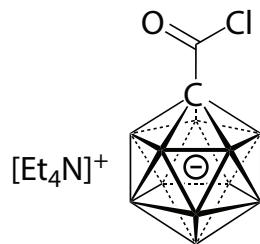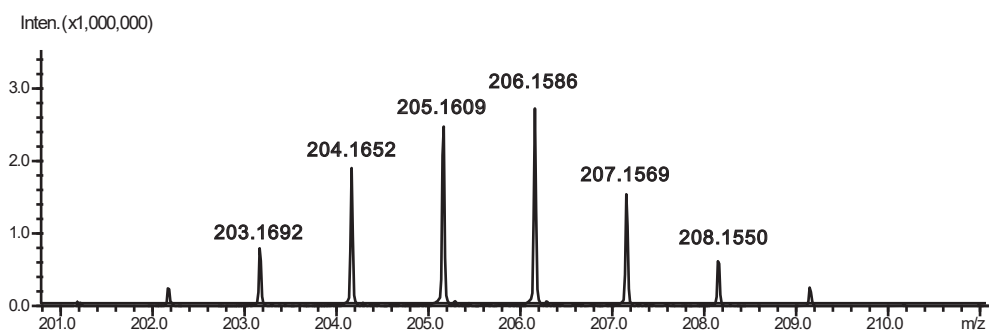

(-)-ESI-HRMS Shimadzu IT-TOF

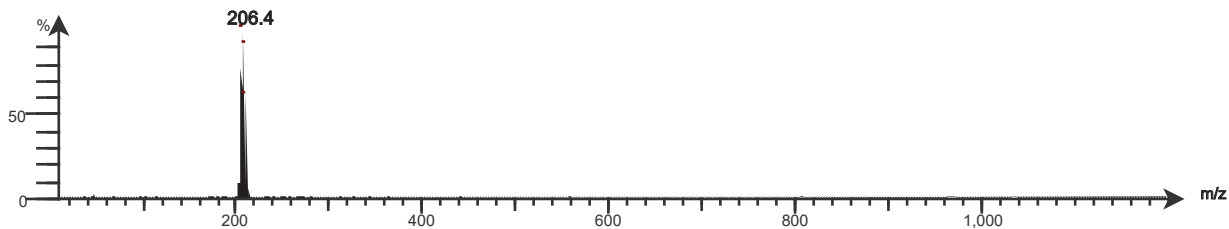

Full-range (-)-ESI-MS Expression CMS

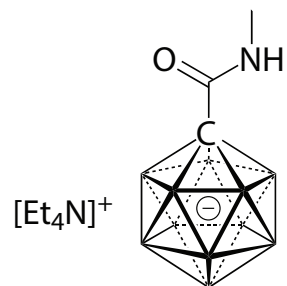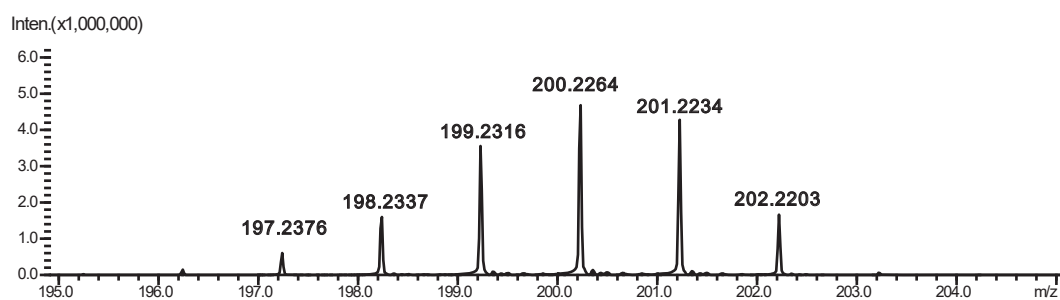

(-)-ESI-HRMS Shimadzu IT-TOF

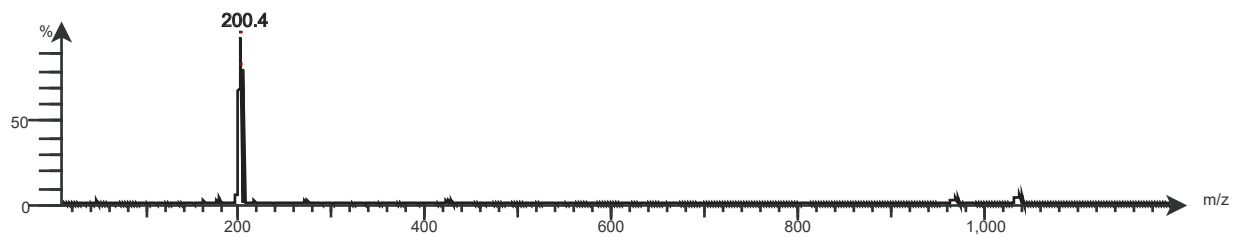

Full-range (-)-ESI-MS Expression CMS

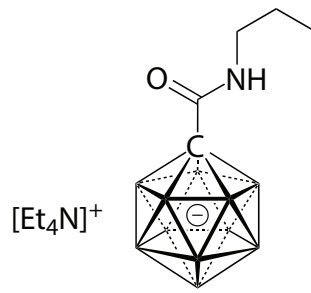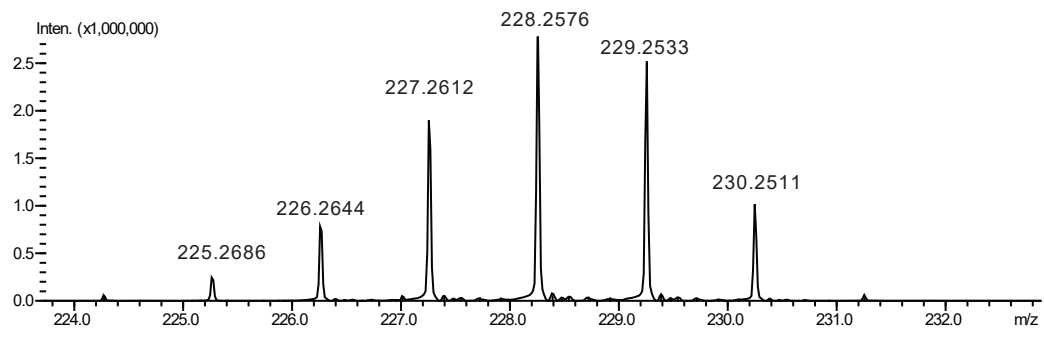

(-)-ESI-HRMS Shimadzu IT-TOF

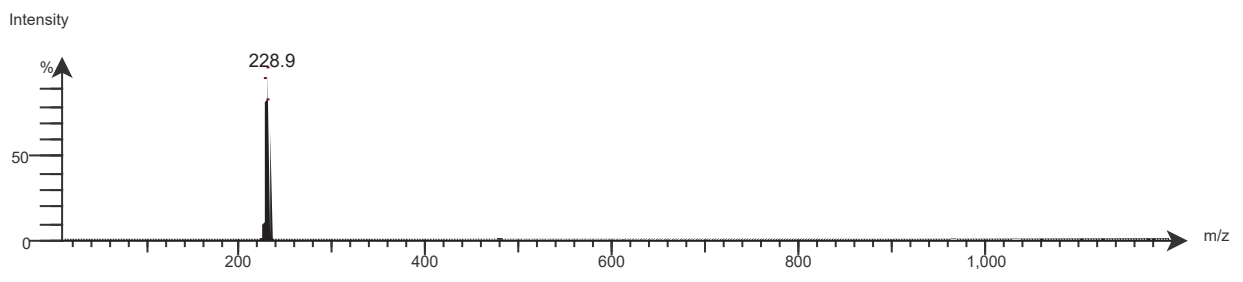

Full-range (-)-ESI-MS Expression CMS

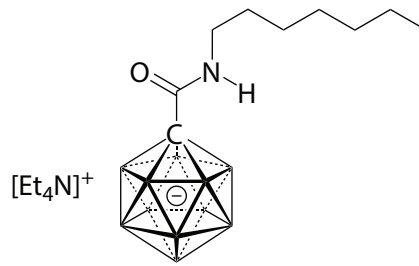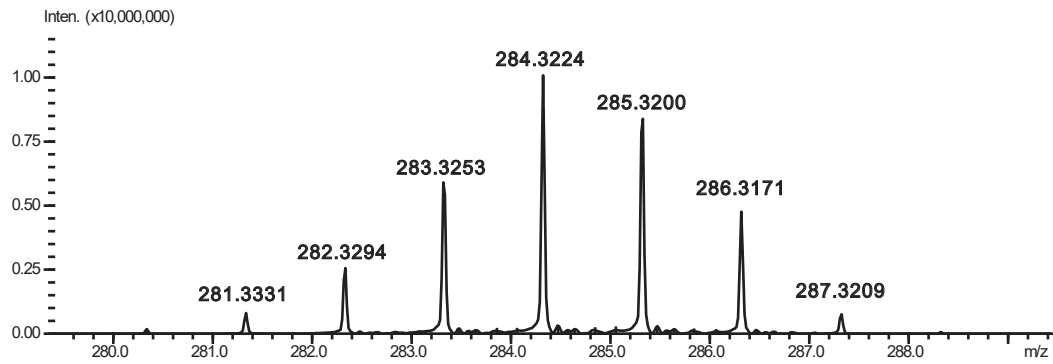

(-)-ESI-HRMS Shimadzu IT-TOF

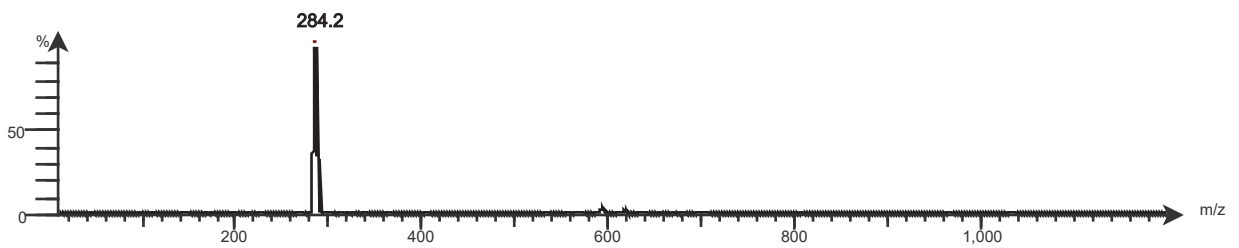

Full-range (-)-ESI-MS Expression CMS

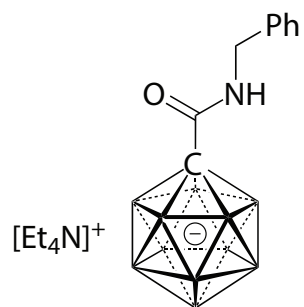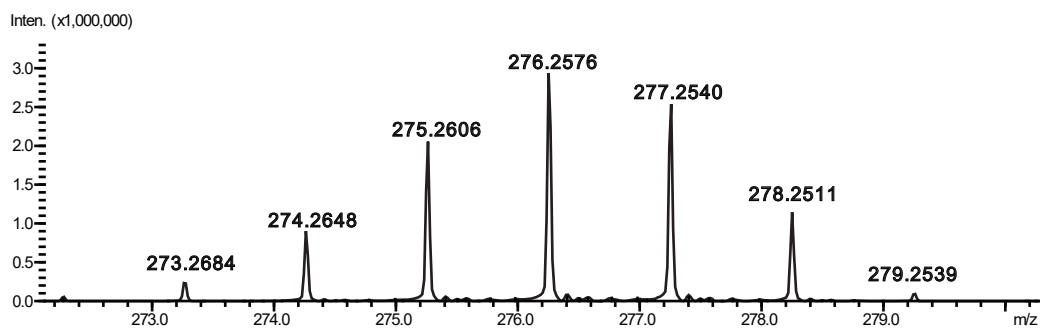

(-)-ESI-HRMS Shimadzu IT-TOF

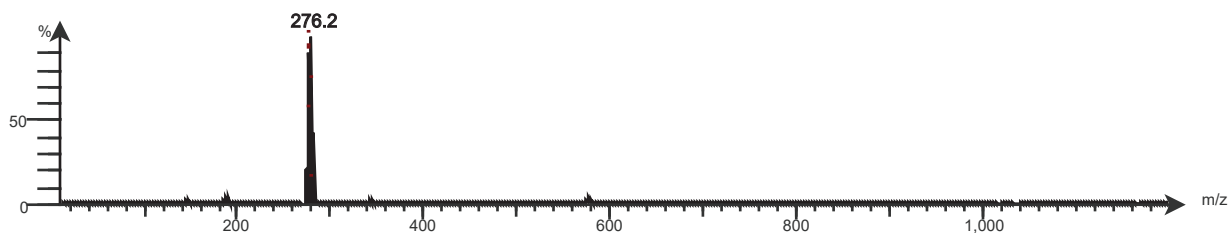

Full-range (-)-ESI-MS Expression CMS

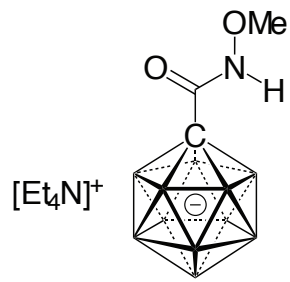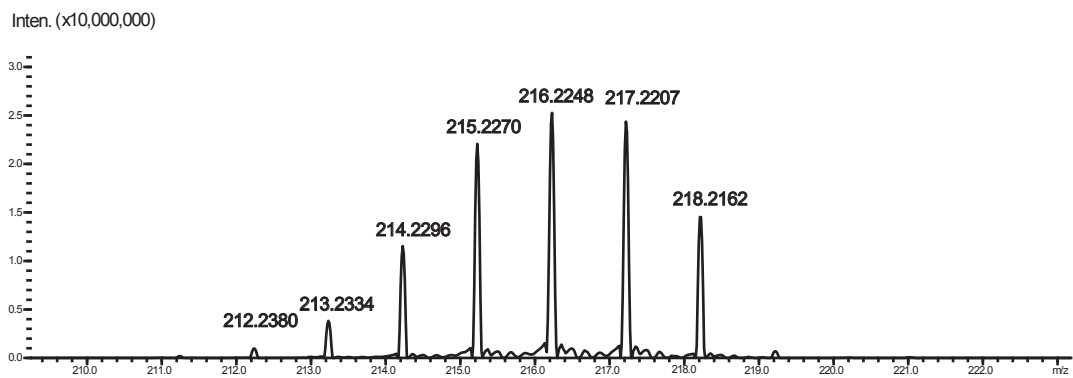

(-)-ESI-HRMS Shimadzu IT-TOF

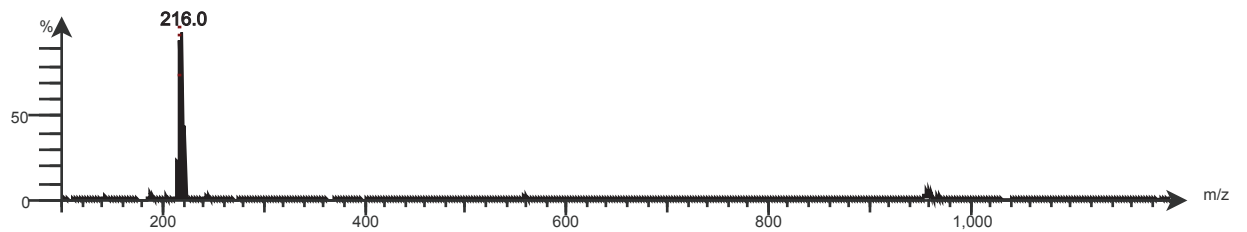

Full-range (-)-ESI-MS Expression CMS

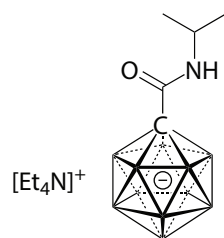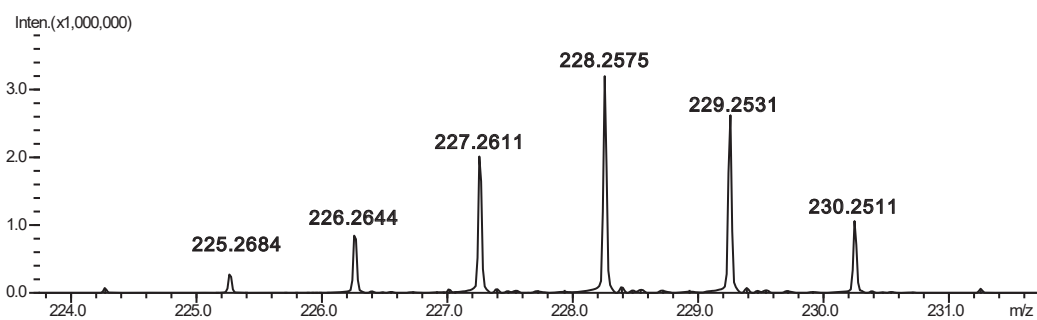

(-)-ESI-HRMS Shimadzu IT-TOF

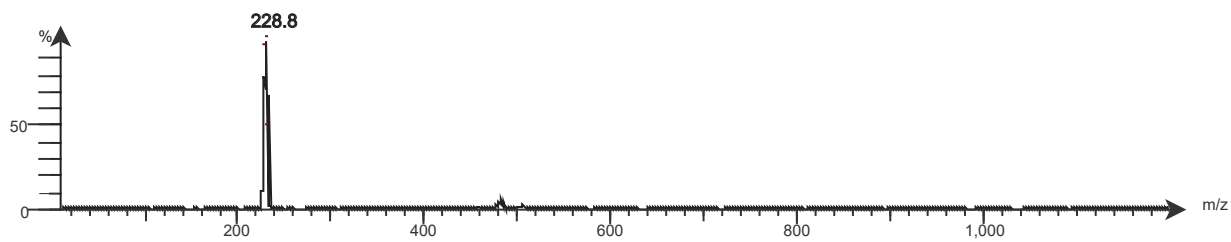

Full-range (-)-ESI-MS Expression CMS

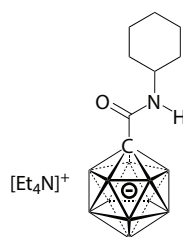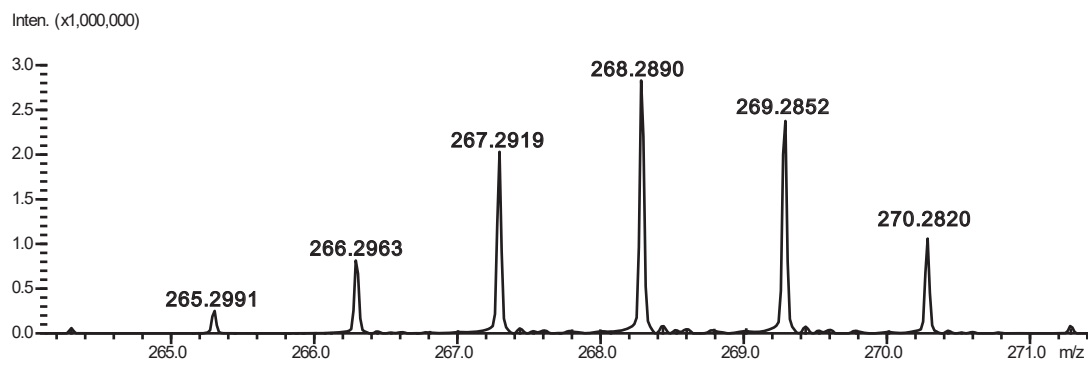

(-)-ESI-HRMS Shimadzu IT-TOF

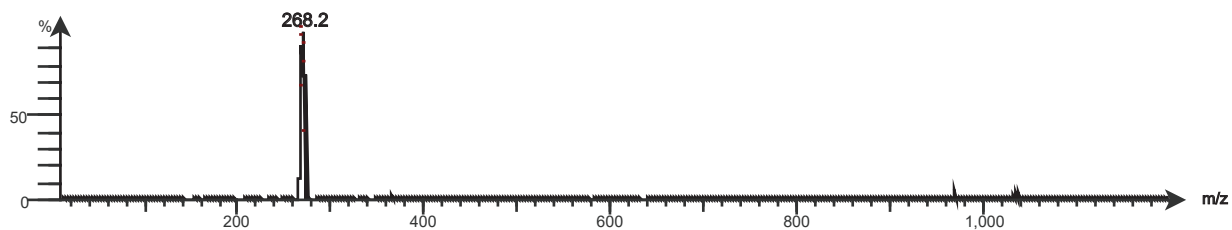

Full-range (-)-ESI-MS Expression CMS



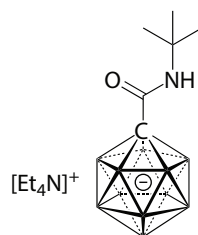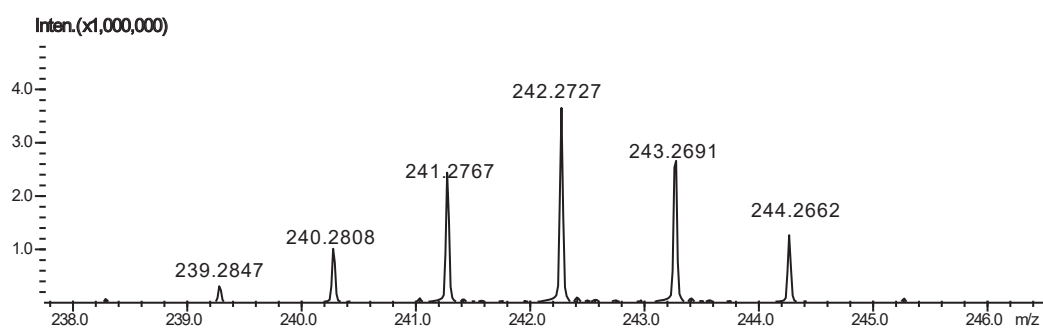

(-)-ESI-HRMS Shimadzu IT-TOF

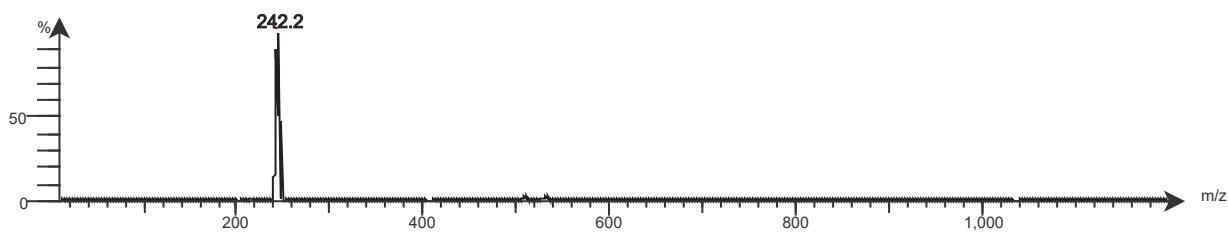

Full-range (-)-ESI-MS Expression CMS

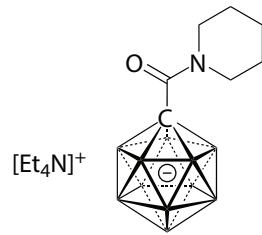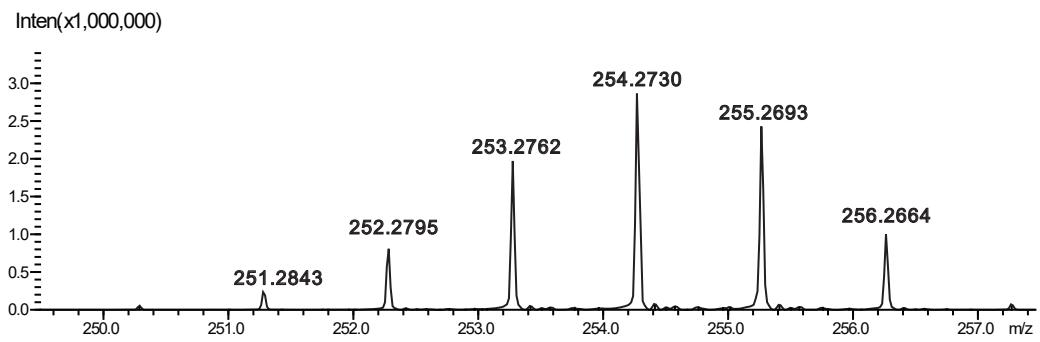

(-)-ESI-HRMS Shimadzu IT-TOF

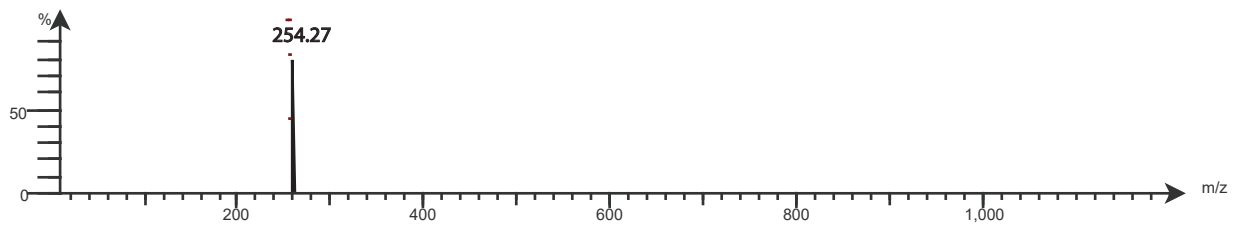

Full-range (-)-ESI-MS Expression CMS

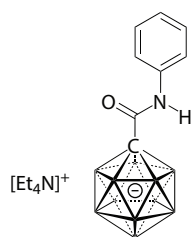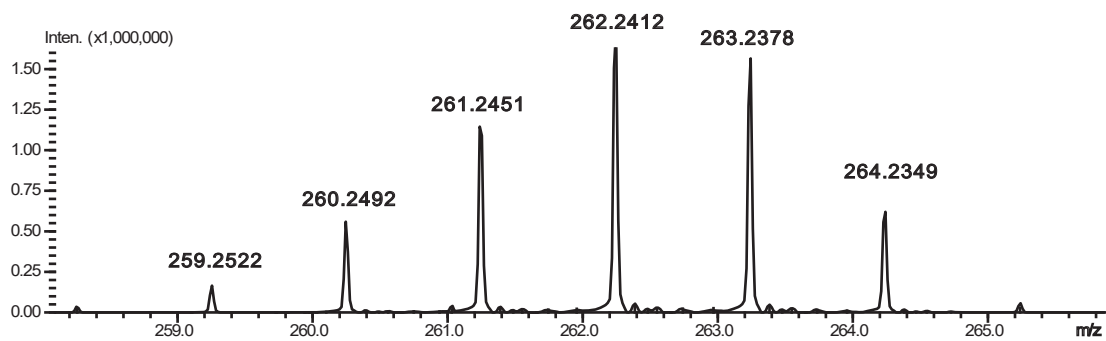

(-)-ESI-HRMS Shimadzu IT-TOF

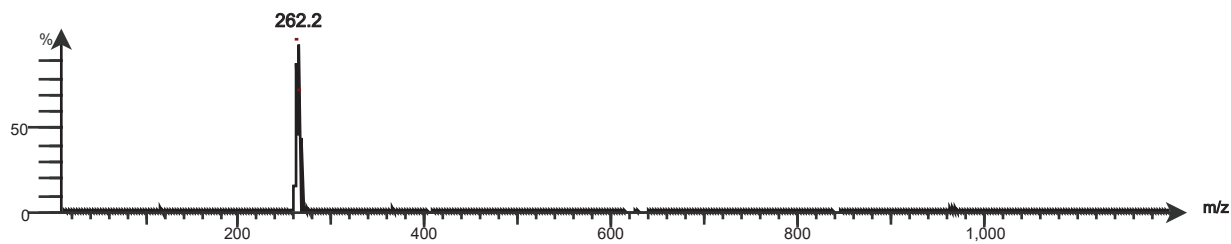

Full-range (-)-ESI-MS Expression CMS

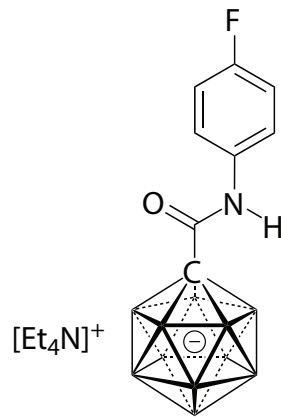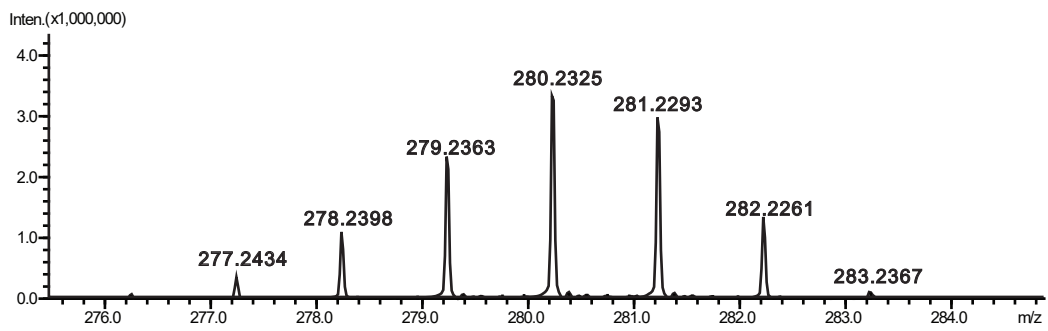

(-)-ESI-HRMS Shimadzu IT-TOF

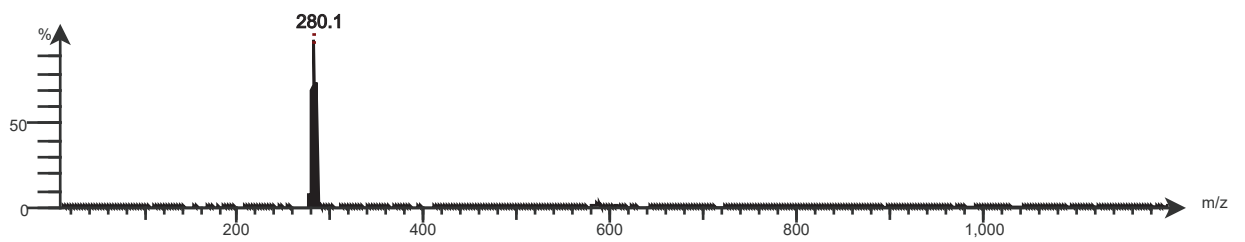

Full-range (-)-ESI-MS Expression CMS

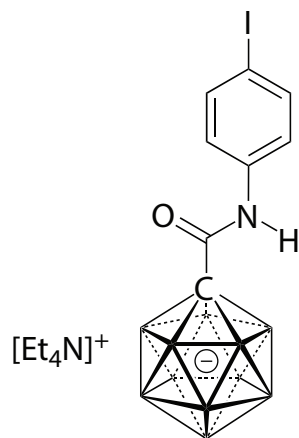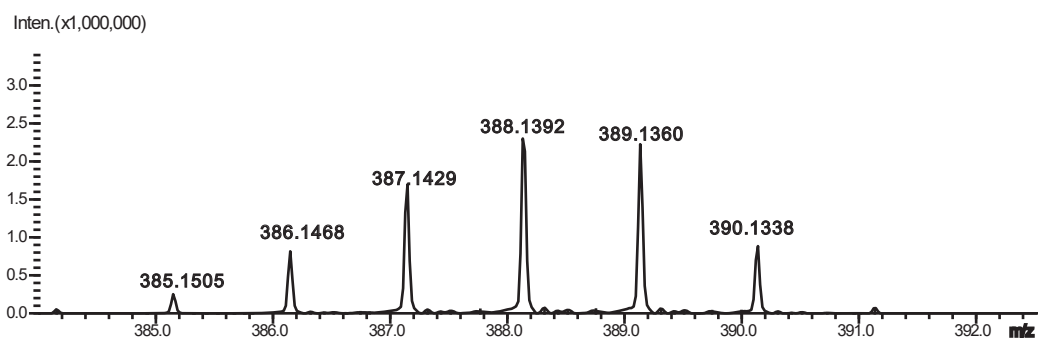

(-)-ESI-HRMS Shimadzu IT-TOF

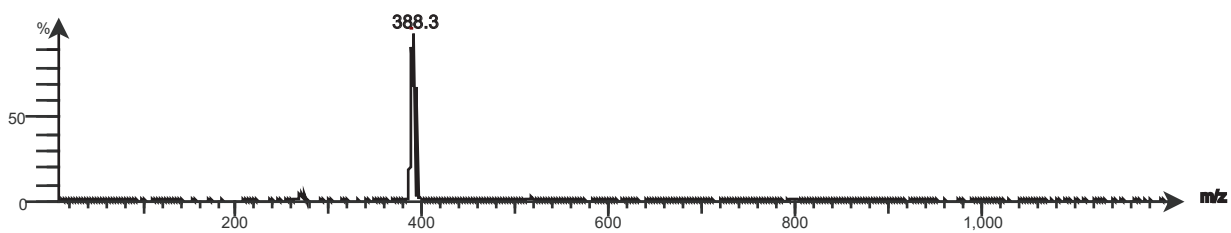

Full-range (-)-ESI-MS Expression CMS

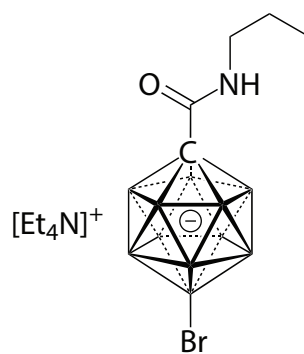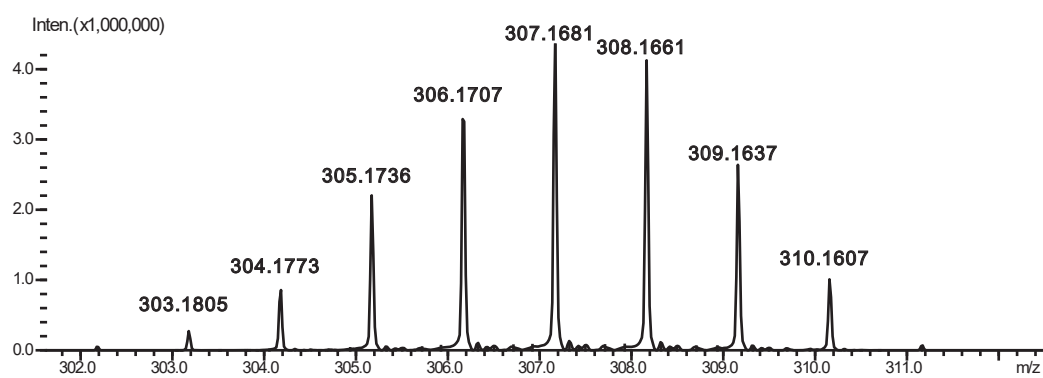

(-)-ESI-HRMS Shimadzu IT-TOF

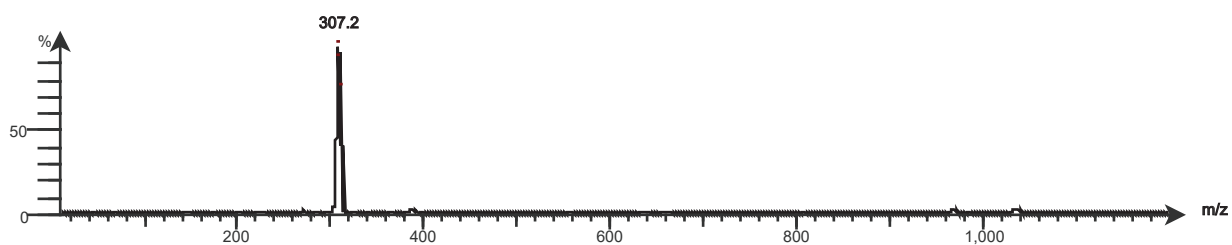

Full-range (-)-ESI-MS Expression CMS

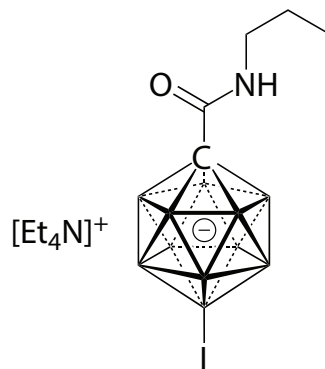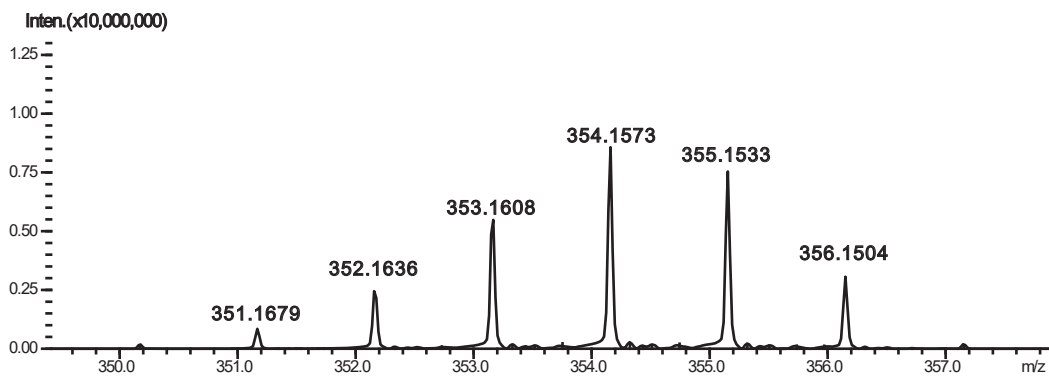

(-)-ESI-HRMS Shimadzu IT-TOF

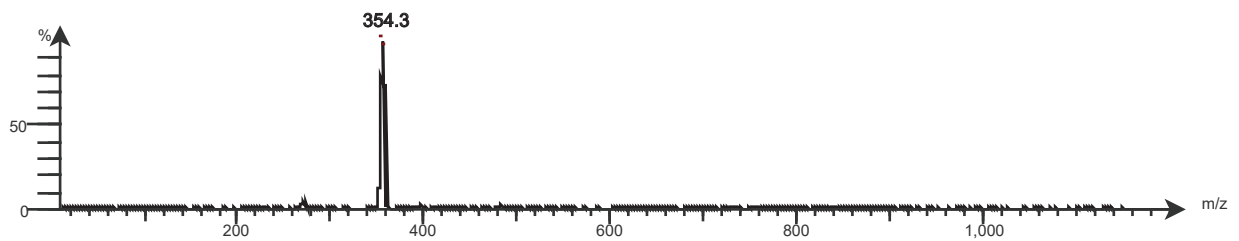

Full-range (-)-ESI-MS Expression CMS

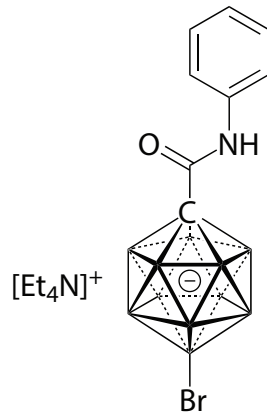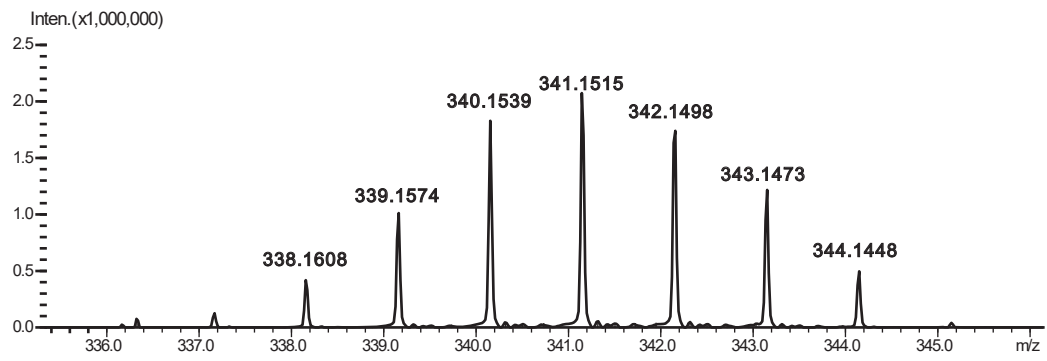

(-)-ESI-HRMS Shimadzu IT-TOF

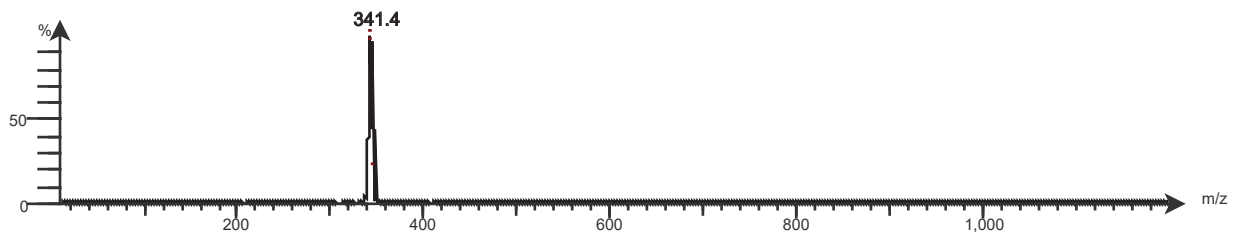

Full-range (-)-ESI-MS Expression CMS



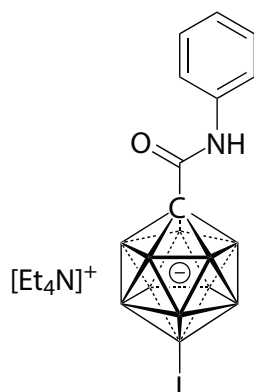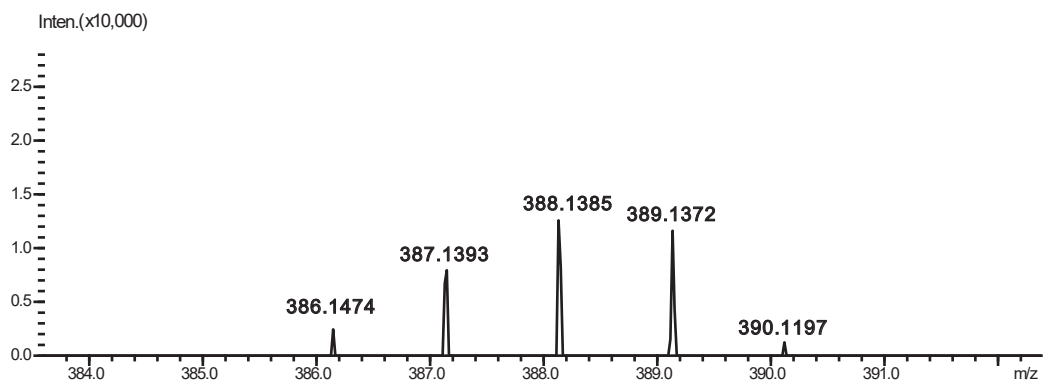

(-)-ESI-HRMS Shimadzu IT-TOF

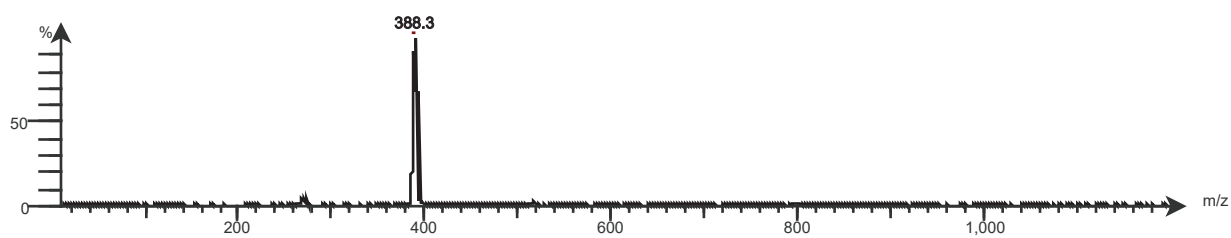

Full-range (-)-ESI-MS Expression CMS

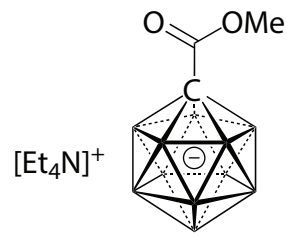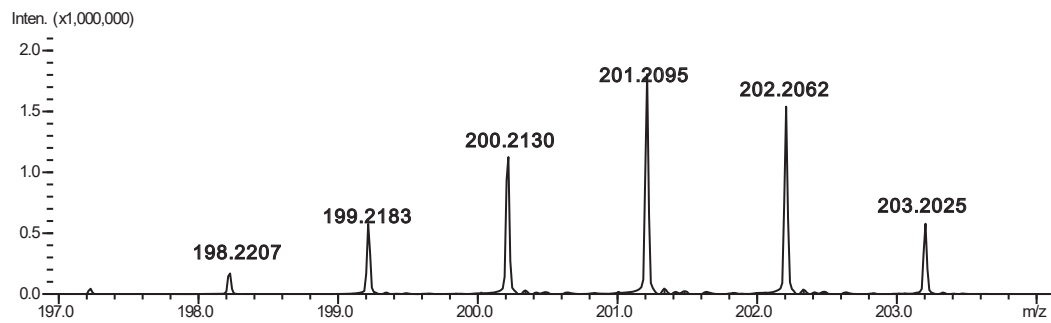

(-)-ESI-HRMS Shimadzu IT-TOF

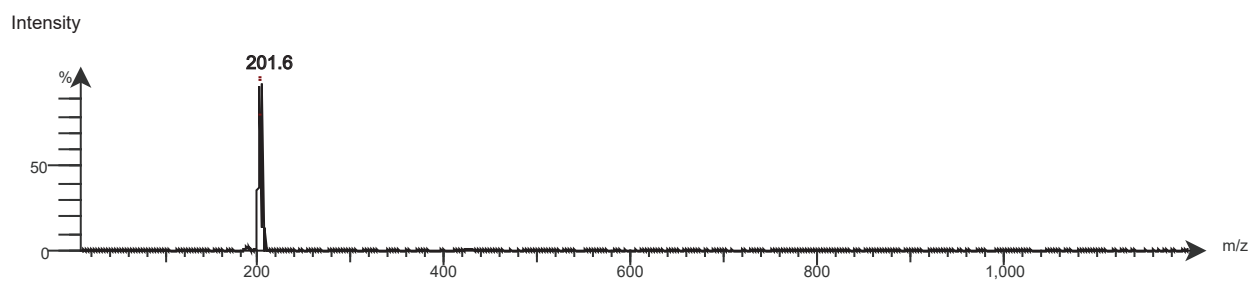

Full-range (-)-ESI-MS Expression CMS

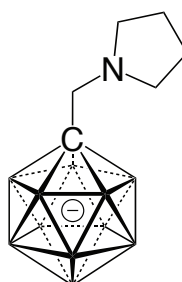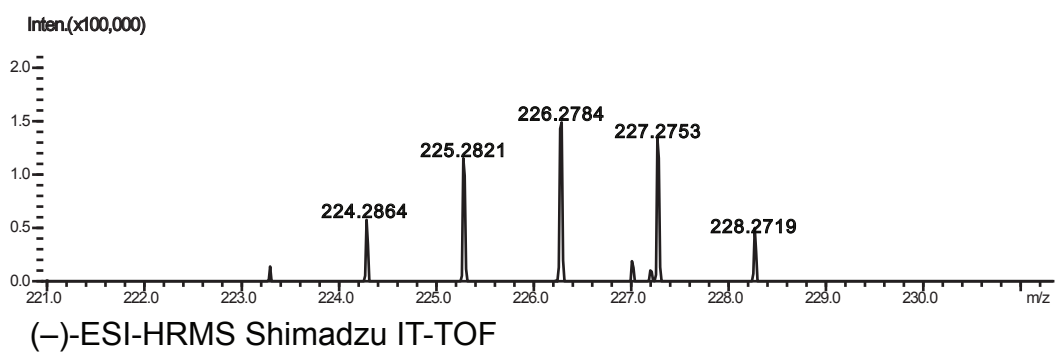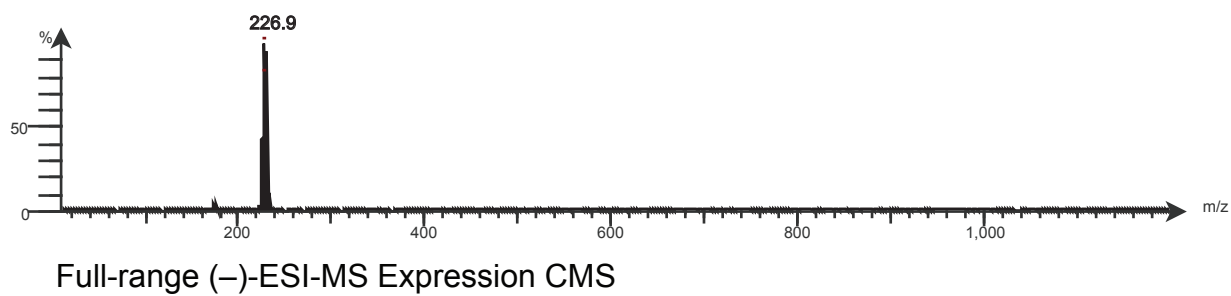

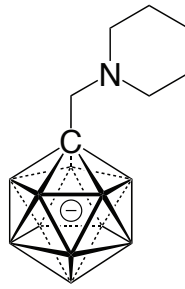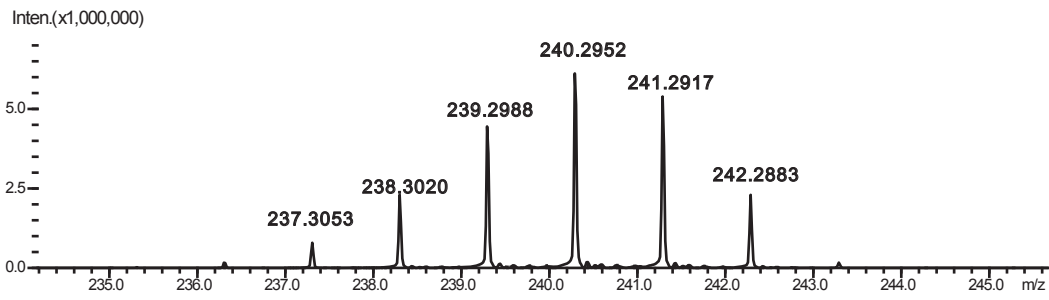

(-)-ESI-HRMS Shimadzu IT-TOF

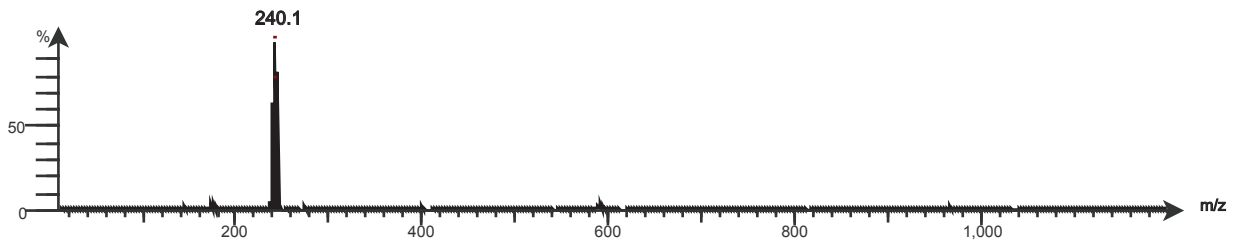

Full-range (-)-ESI-MS Expression CMS
